# Supplementary material for: Genome-Wide Identification and Expression Profiling of the NAC Transcription Factor Family in the Waterlogging-Tolerant Tree Magnolia sinostellata
Source: Research Square preprint supplement (doi:10.21203/rs.3.rs-8390673/v1), 2025-12-25
Supplement: Supplementary file 1 [file 736d781b2b705248d6919d06.xlsx]

## Sheet: Table1
Table S1 Pfam domain architecture of the identified NAC genes in M. sinostellata.
Gene family	Pfam
NAC	No apical meristem (NAM) protein：PF02365

## Sheet: Table2
Table S2 Primer sequences used for RT-qPCR validation.
Gene ID	Forward primer	Reverse primer
MsNAC70	TACTCGGGTACAGAAGCCCA	GCAGACGAGGTATGGAGTCG
MsNAC63	AGCGTTGTTCGGAGAGAAGG	CGACTCTGTTGGGTCGTGAA
MsNAC16	CTAAACCTGCCACCCGGATT	AGCCTTCTCAGGAAGTTGCC
MsNAC14	TCGATCCATGGGACCTTCCT	TCAGCTTGTCTGTTCCCGTC
MsNAC66	TCAAAGATCGCCCTCCCAAC	ATGGCCTGGTCTTGCATCAA
MsNAC65	GTGACATCGACTGCTGTGGA	ATGGTCACCTAAAAGGCGGG

## Sheet: Table3
Table S3 Genome assembly information used for the genome-wide identification of NAC genes.
Species name	Genome data links
Arabidopsis thaliana	https://www.arabidopsis.org/
Magnolia sinica	https://ngdc.cncb.ac.cn/gwh/Genome/2521/show
Magnolia biondii Pamp.	https://doi.org/10.5061/dryad.s4mw6m947

## Sheet: Table4
Table S4 Amino acid sequences of the NAC transcription factor family in M. sinostellata.
Gene Name	Protein name	geneID	pfam_id1	pfam_name1	chromosome	strand	start	end	CDS_seq	protein_seq	protein_len	Description	GOs
MsNAC1	evm.model.ctg102.5	evm.TU.ctg102.5	PF02365.20	No apical meristem (NAM) protein	Chr8	-	18794365	18795424	ATGGGAGAAGATAGAATCAATCTCCCCCCTGGTTTCCGATTTTATCCCACGGATGAAGAGCTCGTTGTTCATTTCCTTCGTCGTAAGGCAGCCCATTTAACTTTCCACCCTGATATCATCCCTGATGTCGATCTCGACCGCTACAATCCATGGGAACTCAGTGGTAAGGCATTAGAAGCAAATAATCAATGGTATTTCTTCAGCCAAATGACCCAAAATCGAGTTTCATCGAATGGATATTGGAAAACCGTTGGTTATGATGAACCCATTACAAGTGGGAGCAAGACAGTGGGCATGAAGAAATCTCTTGTTTTCTACGTTGGTGAATCTCCAACCGGTATGAAAACCAACTGGGCCATGCACGAGTATCAGCTCTTGGAATGTGGCACATCTACTAGC…	MGEDRINLPPGFRFYPTDEELVVHFLRRKAAHLTFHPDIIPDVDLDRYNPWELSGKALEANNQWYFFSQMTQNRVSSNGYWKTVGYDEPITSGSKTVGMKKSLVFYVGESPTGMKTNWAMHEYQLLECGTSTSSRSSKRRGKPKIAWNEWVLCRVYENNCGSQSGFCDDGTETDLSSLDEVFLSLDDMDEISLPN	195	NAC transcription factor	GO:0003674,GO:0003700,GO:0006355,GO:0007275,GO:0008150,GO:0009888,GO:0009889,GO:0010087,GO:0010089,GO:0010468,GO:0010556,GO:0010941,GO:0019219,GO:0019222,GO:0031323,GO:0031326,GO:0032501,GO:0032502,GO:0043067,GO:0048367,GO:0048731,GO:0048856,GO:0050789,GO:0050794,GO:0051171,GO:0051252,GO:0060255,GO:0065007,GO:0080090,GO:0140110,GO:1903506,GO:2000112,GO:2001141
MsNAC2	evm.model.ctg103.41	evm.TU.ctg103.41	PF02365.20	No apical meristem (NAM) protein	Chr8	-	20802572	20805391	ATGGTCTTTGGTGATTTTTTAGAGCAGTCTATGGCAATCTCAGCAGCCATGAGCGGTGGTGGCGCTGATAAGGATGGCCACGAGCATGACGTCGTGATGCCCGGCTTCCGCTTCCACCCCACGGAGGAAGAGCTCATCGAATTCTACCTCCGTAGAAAGGTTGAAGGAAAGCGCTTCAACGTCGAGCTGATAACCTTCGTCGATCTCTACCGCTACGATCCATGGGAGCTCCCTGCTTTAGCAGCAATTGGAGAGAAGGAATGGTTCTTCTATGTGCCTAGAGACCGGAAATATCGAAACGGAGACCGACCGAACCGAGTGACGACTTCTGGGTACTGGAAGGCAACAGGTGCCGATCGGACAATCAGAAGTGAGAGCTGCCGGTCAATCGGATTGAAG…	MVFGDFLEQSMAISAAMSGGGADKDGHEHDVVMPGFRFHPTEEELIEFYLRRKVEGKRFNVELITFVDLYRYDPWELPALAAIGEKEWFFYVPRDRKYRNGDRPNRVTTSGYWKATGADRTIRSESCRSIGLKKTLVFYSGKAPKGVRTSWIMNEYRLPHNETDRHQKTEISLCRVYKRPGVEDHCPHPSSLSSRPSSSKGTELDKNANMGHQVTASSQTLRGDPPSSEIDNMNEEGSSNSVNAEAALGFHRSYGVYTPTAPISSALMEEETRLLHQSKQEGPLQPTCTFFPSSSSMPITTIDELHRLIDSQHTYGHHPTQIYPSVSSSQSQSLAFNAMPNTLPTFSDKLWEWNLIPDANRDYTTYK	367	NAC domain-containing protein	GO:0003674,GO:0003700,GO:0006355,GO:0008150,GO:0009889,GO:0010468,GO:0010556,GO:0019219,GO:0019222,GO:0031323,GO:0031326,GO:0050789,GO:0050794,GO:0051171,GO:0051252,GO:0060255,GO:0065007,GO:0080090,GO:0140110,GO:1903506,GO:2000112,GO:2001141
MsNAC3	evm.model.ctg103.69	evm.TU.ctg103.69	PF02365.20	No apical meristem (NAM) protein	Chr8	-	21675733	21679984	ATGACGACGTCGAATGGTGGGGTCCCACCTGGGTTTCGTTTCCATCCAACGGACGAGGAACTCCTGCATTACTACCTGAGGAAGAAGATTTCTTTTCAAAAATTCGACTTGGAGGTGATCAGAGACGTTGATCTGAATAAGATGGAGCCGTGGGACTTACAAGAGAGGTGTAGGATAGGATCGACGCCTCAGAACGAGTGGTATTTCTTCAGTCACAAGGACAGGAAGTATCCAACAGGGTCGAGGACGAACAGAGCGACAAACGCGGGTTTTTGGAAGGCGACTGGCAGGGATAAGTGTATAAGGAACAGCTACAAGAAGATAGGTATGAGGAAGACGCTTGTGTTTTACAGAGGGCGGGCCCCACATGGCCAAAAGACGGACTGGATCATGCACGAG…	MTTSNGGVPPGFRFHPTDEELLHYYLRKKISFQKFDLEVIRDVDLNKMEPWDLQERCRIGSTPQNEWYFFSHKDRKYPTGSRTNRATNAGFWKATGRDKCIRNSYKKIGMRKTLVFYRGRAPHGQKTDWIMHEYRLEENDDIQGNGTEDGWVVCRVFKKKNLFKVGNEGSTSSGPDRQINGGMSIDQSRPLTLKDVHYDRRQHNQDNLHTYDLYKPDLALHYSHVPTTPYSNVEAQAHLQNHKPIGYDFPGLPTEPPIMVKQFLSSQGACDSDEGLARQVQYQPCDAGLEVGTCEQSQQMVEGRDGGLNDWAMLDRLVSNTQVGQEESSKGVRFVDASPSVHQMNHQLSLRGEMDLWGYGK	361	BEARSKIN1-like	GO:0003674,GO:0003676,GO:0003677,GO:0003700,GO:0005488,GO:0006355,GO:0007275,GO:0008150,GO:0009832,GO:0009834,GO:0009889,GO:0009891,GO:0009893,GO:0009987,GO:0010468,GO:0010556,GO:0010557,GO:0010604,GO:0010628,GO:0019219,GO:0019222,GO:0022622,GO:0031323,GO:0031325,GO:0031326,GO:0031328,GO:0032501,GO:0032502,GO:0042546,GO:0043565,GO:0044085,GO:0045893,GO:0045935,GO:0048364,GO:0048518,GO:0048522,GO:…
MsNAC4	evm.model.ctg106.321	evm.TU.ctg106.321	PF02365.20	No apical meristem (NAM) protein	Chr8	-	45470930	45479043	ATGGCACCAATGACTTTACCTCCTGGCTTTCGTTTTCATCCAACCGATGAAGAACTCGTTGCCTACTACCTCAAGAGAAAGATCAACGGCCGTAAGATTGAGTTAGAGATCATCCCCGCAGTCGATCTTTACAAATGCGAGCCATGGGATTTGCCAGAGAAATCATTCTTGCCAAGCAAAGATCTTGAGTGGTATTTCTTCAGCCCTCGAGATCGTAAGTATCCTAACGGATCGAGGACGAATCGAGCGACCAAGGCCGGCTACTGGAAGGCAACGGGGAAAGATCGGAAGGTGATGTCCCACATGCGGGAAGTTGGCATGAAGAAGACGCTCGTCTACTACCGAGGACGTGCTCCCCACGGCTCACGGACGGACTGGGTCATGCACGAATACCGCCTT…	MAPMTLPPGFRFHPTDEELVAYYLKRKINGRKIELEIIPAVDLYKCEPWDLPEKSFLPSKDLEWYFFSPRDRKYPNGSRTNRATKAGYWKATGKDRKVMSHMREVGMKKTLVYYRGRAPHGSRTDWVMHEYRLDERECETLSGLQDAYALCRVFKKNGLGPKMDDQYVAPHDDHSQWMHNDRSSGMELSSDGRGEDMESNGYPFPSDTCSSGIVQGASFHVHERGDGAWMQFLAEEALSSADPPFPDNADFAFLPSKVDVALERARLHQRLTLPPLEMDDFPQIDLPGPHSGFSRPDVNEVDILQEILSVACASQQLIDQSNHKEMWATGNYHPSDEFSPVTELEIGGRNEKNQVGDMVSSKLIEISDLEEEFEGAKVVENLRGVKMSHKNLEESTQEH…	573	NAC domain-containing protein	GO:0001067,GO:0003674,GO:0003676,GO:0003677,GO:0003700,GO:0005488,GO:0005575,GO:0005622,GO:0005623,GO:0005634,GO:0005737,GO:0006355,GO:0008150,GO:0009314,GO:0009416,GO:0009628,GO:0009642,GO:0009644,GO:0009889,GO:0009891,GO:0009893,GO:0009962,GO:0009987,GO:0010468,GO:0010556,GO:0010557,GO:0010604,GO:0010628,GO:0016043,GO:0019219,GO:0019222,GO:0022411,GO:0030154,GO:0031323,GO:0031325,GO:0031326,GO:…
MsNAC5	evm.model.ctg111.127	evm.TU.ctg111.127	PF02365.20	No apical meristem (NAM) protein	Chr8	-	88927632	88930885	ATGGAAAAAACATCCTCCGACCTGGATCTCCCAGGATTTAGGTTCCACCCAACAGAAGAAGAGCTCCTTGATTTCTATCTGAAGGGCATTCTCTACGGTAAAAAGCTTAGCTTTGATATCATTGGAACCCTCAACTTGTATCGCCATGACCCTTGGGAGTTGCCAGGGTTGGCGAAGATAGGCGAGCGGGAATGGTACTTCTTCGTGCCGAGAGACAGACGTCATGCGAACGGGGGGCGTCCGAATCGTACGACTGAGAATGGATTTTGGAAGGCAACGGGTTCGGATCGTCAGATACGAAGCGTGAAGGACCCCAAACGGGTTATTGGGTTGAGGAAGACGCTTGTTTTTTACAAGGGAAGAGCCCCACGAGGGTGTAAGACGGACTGGGTCATGAAC…	MEKTSSDLDLPGFRFHPTEEELLDFYLKGILYGKKLSFDIIGTLNLYRHDPWELPGLAKIGEREWYFFVPRDRRHANGGRPNRTTENGFWKATGSDRQIRSVKDPKRVIGLRKTLVFYKGRAPRGCKTDWVMNEYRVPDTCPSPKEDIVLCKIYRKATSLKVLEQRAAMEEDMRTSQVCISEADMVLSPEQENLPMTMIPTKEDVWEEEKKNKNEKGSEVSSKQMSWVKDNLPELQLPKFNMEWMQETFSLRSPWLENWTPYANVLNF	268	NAC domain-containing protein	-
MsNAC6	evm.model.ctg137.42	evm.TU.ctg137.42	PF02365.20	No apical meristem (NAM) protein	Chr10	-	992475	998579	ATGGAAGAAAAATTAGGAATGGCGAGAGTAGGAGAGGGGAAGAAAAATGAACGGTTTGATGGAGGTTTTCCACCGGGCTACAGGTTCTGTCCCACTGATGCTGAGCTTATCGTTTATTACCTTAAAAGGAAAAACCTTGGCCAACCTCTTCCACCTAATATTATTGGTGAAATAGAGTTGTACAATCATAGCCCAGATGAACTTGTACGTTTATATCTCACCATGCATGGGACTGAAAGAGATGCAGATTACTCATTGAGTAGAAAAAGGAAAGAATGTTACTTCTTTACTTCTAGAGATAAAAAATACAAGAAGGGAGAGCGTCCCAGACGGGACGCTGGAAACGGCTTCTGGAAAGCTACGGGTGCAGATAATCCCATCGTTGATGAGAATGGTGTT…	MEEKLGMARVGEGKKNERFDGGFPPGYRFCPTDAELIVYYLKRKNLGQPLPPNIIGEIELYNHSPDELVRLYLTMHGTERDADYSLSRKRKECYFFTSRDKKYKKGERPRRDAGNGFWKATGADNPIVDENGVDTGGVKKSLVYYIGNHKASDKSNWIMHEYRLEKTPETMVRNDGNMRMDGWVLCRIYEKNEKKDSSDNLNEIEDEEVNAVISNEPQSTEASPTISNNKGNFNNWLVRANAAISTEDGGQHRKNELRFIKNFNNWLDRTYAAISTEDGGEHLKSDPLLMADYANPISAMASSSCHHGVNPTAFNNNDNFENGLVESYAAISTEDGGEHLKSKPGLMAADVNPISTIASSSYHPECLNQYHDPFEGLSEEE	381	NAC domain-containing protein	GO:0001101,GO:0003674,GO:0003700,GO:0006355,GO:0006950,GO:0008150,GO:0009414,GO:0009415,GO:0009628,GO:0009889,GO:0010035,GO:0010468,GO:0010556,GO:0019219,GO:0019222,GO:0031323,GO:0031326,GO:0042221,GO:0050789,GO:0050794,GO:0050896,GO:0051171,GO:0051252,GO:0060255,GO:0065007,GO:0080090,GO:0140110,GO:1901700,GO:1903506,GO:2000112,GO:2001141
MsNAC7	evm.model.ctg140.1	evm.TU.ctg140.1	PF02365.20	No apical meristem (NAM) protein	Chr10	+	28747811	28750508	GTCTTGCAAGAGTGGCCAGGTTTACCTCGAGGTGTGAAATTTGATCCATCTGATCCAGAGCTTCTTTGGCATTTATGTGCAAAAGCTGGTGTGGGGGACGTAAAAGCCCATCCTTTTATTGATGAATTCATCCCAACTGTTGATGAAGATGGCGGAATCTGTTGTAGCCATCCACGGAAGCTGCCAGGAGTTAAGGAGGATGGAAATGTGTCCCACTTCTTCCATAGAACATTCAAGGCGTATAACACCGGAACTAGGAAGCGTCGAAAGGTGCAGAATGATGACTTTGGGGACGTCCGTTGGCATAAGACTGGCAAGACTAAACCTTTACTTGTTGATGGAATACACAAAGGATGCAAGAAGATAATGGTTTTGTATATGAACACGGCGAGGGGTGGA…	VLQEWPGLPRGVKFDPSDPELLWHLCAKAGVGDVKAHPFIDEFIPTVDEDGGICCSHPRKLPGVKEDGNVSHFFHRTFKAYNTGTRKRRKVQNDDFGDVRWHKTGKTKPLLVDGIHKGCKKIMVLYMNTARGGKAEKTNWVMHQYHLGTGEEEKDGEFVVSKVFYQQQSKPSDKNEQELPLDVMEAMPVDIPEAVIPKVDPVTPKSVTPEPPRSEKQHPDCGLGHEPMYACNERSAQVSVIEYNEIEHEESGAQPEWEEEKCDYHENQPTEDQKWWEGESQFLLDSQQLVEGLSLCDELLQSQSSCGGGEPRKDMPRLSDYAHIGAEDLKKDLEECQKLSHFDNTNIELDTPPEFRLSQLEFGSQESFLAWAGSKVGD	378	NAC domain transcription factor superfamily protein	-
MsNAC8	evm.model.ctg144.249.1	evm.TU.ctg144.249	PF02365.20	No apical meristem (NAM) protein	Chr10	-	67190007	67191740	ATGAAGAGAGAAAGAGATGCTGAAGCTGAATTGAATTTACCACCCGGATTCCGTTTCCATCCAACGGACGAGGAGCTCGTCATCCATTACCTCTGCCGTAAAGCCACTTACCAGTGCCTGCCCGTTCCAATCATTGCCGAGGTCGATCTCTACAAATTCGATCCGTGGCAGCTTCCAGAGAAGGCATTGTTTGGAGAAAAGGAATGGTATTTCTTCACCCCGCGGGACAGGAAATACCCGAACGGATCCAGGCCTAACAGGGCTGCTGGTACTGGCTATTGGAAGGCGACTGGTGCCGATAAACCCATCAGACCGACAGGGAGCGCTAGGCATGCCGGCATAAAGAAGGCATTAGTCTTCTACGCTGGGAAAGCACCCAAAGGAGTTAAGACTAATTGG…	MKRERDAEAELNLPPGFRFHPTDEELVIHYLCRKATYQCLPVPIIAEVDLYKFDPWQLPEKALFGEKEWYFFTPRDRKYPNGSRPNRAAGTGYWKATGADKPIRPTGSARHAGIKKALVFYAGKAPKGVKTNWIMHEYRLADPNRSTNKKGSLRVSFTILNSLLLQSLLLISNGLTWRSGFLQLDDWVLCRLYNKKNGLEKVVQKTEAPSFEETMDSLEAIDDTGSDSFRTPESDVDNDSFTEVNHLGRGKAMKTDMTSNFKMDEHLKEDNDWFMGLNLDDLQNSFAGFEGIPTSDSLYQDYYFQSLSSPQLKPGQTNFLPF	322	(NAC) domain-containing protein	GO:0003674,GO:0003676,GO:0003677,GO:0005488,GO:0005515,GO:0006355,GO:0008150,GO:0009889,GO:0010468,GO:0010556,GO:0019219,GO:0019222,GO:0031323,GO:0031326,GO:0042802,GO:0042803,GO:0043565,GO:0046983,GO:0047484,GO:0048518,GO:0048583,GO:0048584,GO:0050789,GO:0050794,GO:0051171,GO:0051252,GO:0060255,GO:0065007,GO:0080090,GO:0080134,GO:0097159,GO:1901000,GO:1901002,GO:1901363,GO:1902584,GO:1903506,GO:…
MsNAC9	evm.model.ctg144.270	evm.TU.ctg144.270	PF02365.20	No apical meristem (NAM) protein	Chr10	+	68168906	68171918	ATGTCAAACCCAGAACCATCCCTTCCACCAGGTTTCAGATTCCACCCGACCGACGAAGAGCTCATCCTCCACTATCTAAAAAACAAAACCACCTCCACCCCATGTCCGGTCTCCATCATAGCCGAAGTTGATATATACAAGTTCAATCCATGGGATCTTCCAGCTAAAGCAGCTTTCGGAGATAAAGAGTGGTATTTTTTCACCCCCAGAGATCGAAAGTACCCGAACGGGGCCCGCCCAAATCGGGCCGCTGCTTGTGGGTATTGGAAGGCGACTGGAACCGATAAACCGATATCGAGGACGACGGCTGGGAAGGAGAATATAGGAGTGAAGAAAGCTCTTGTATTTTACAAGGGTAGACCTCCTAAGGGCATCAAGACTAACTGGATCATGCATGAA…	MSNPEPSLPPGFRFHPTDEELILHYLKNKTTSTPCPVSIIAEVDIYKFNPWDLPAKAAFGDKEWYFFTPRDRKYPNGARPNRAAACGYWKATGTDKPISRTTAGKENIGVKKALVFYKGRPPKGIKTNWIMHEYRLAEVENHYKPMKLKDSSMRLDDWVLCRIYRKNSHIHPNEAIVTDQELEDRSIASSMWSNTAHRSAMELPKTSSFSDILAAGDFSSLTNLLSDNPSNSVAPELSSIFCNANNSQPISINSNNNNSYPVQKLSQQDPSALDIDNQIKRHRSADPTEGVLHPSKKFNSSCNFSNMSSQLEAPQYHLLNQPFFNPQILLNSHFEFQ	337	No apical meristem (NAM) protein	-
MsNAC10	evm.model.ctg144.273	evm.TU.ctg144.273	PF02365.20	No apical meristem (NAM) protein	Chr10	+	68302619	68304448	ATGGAGCAAGTTGAAATTCTATCAAAGGGAGATGACTGTATAGATTTACCAGCTGGATTTAGGTTTCATCCCACAGATGAAGAGATCATAACCCATTATCTTTCACCCAAGGTCTTGGATAACGGCTTCAGTGCAAGAGCCATTGGAGAAGTGGATTTGAATAGGTGTGAGCCTTGGGAACTGCCTGATAAAGCTAAGATGGGAGAGAAGGAATGGTATTTCTTTTGCCAAAGAGATAGGAAATATCCAACTGGAACGAGGACTAATAGAGCCACAGAAGCTGGTTATTGGAAAGCCACAGGAAAAGATAAGGAGATCTACAAAGGGAAAGGTTGTCTTGTTGGGATGAAAAAGACTCTTGTTTTCTACAAAGGTAGAGCACCCAAAGGAGAAAAAACC…	MEQVEILSKGDDCIDLPAGFRFHPTDEEIITHYLSPKVLDNGFSARAIGEVDLNRCEPWELPDKAKMGEKEWYFFCQRDRKYPTGTRTNRATEAGYWKATGKDKEIYKGKGCLVGMKKTLVFYKGRAPKGEKTNWVMHEFRLDGKLSFYKLSKASKDEWVVCKVFHKLSGIKRSPISGIPRMNSYSHDFFDSTSLPPLSDVPHLDGNQPSSSFIYGEGQDQVDQKSFLPNNYSNINHQNSITNTQLPLPNTMFPFPGSDNLGYSNISIPRFPSSNFDGPDLVMLRALAATLKASGLKTECKVEQFSNQSMVSQDTGISADVNPEISSVISKHEMGFEDLDCPSTAGPVDLDYLWNY	356	(NAC) domain-containing protein	GO:0003674,GO:0003700,GO:0005575,GO:0005622,GO:0005623,GO:0005634,GO:0005737,GO:0006355,GO:0008150,GO:0009889,GO:0009893,GO:0009894,GO:0009896,GO:0010271,GO:0010468,GO:0010556,GO:0019219,GO:0019222,GO:0031323,GO:0031325,GO:0031326,GO:0031329,GO:0031331,GO:0043226,GO:0043227,GO:0043229,GO:0043231,GO:0044424,GO:0044464,GO:0048518,GO:0048522,GO:0048831,GO:0050789,GO:0050793,GO:0050794,GO:0051094,GO:…
MsNAC11	evm.model.ctg162.147	evm.TU.ctg162.147	PF02365.20	No apical meristem (NAM) protein	Chr11	+	79430221	79440747	ATGACGCAGAAGCCCAACTTCCCTCCTGGCTACCGCTTTGTTCCGACTGATGCTGAGTTGTTGCTATACTATCTCAAGAACAAGAATCTGGGTCGTCCGCTCCCTGCTGATATAATCCCAGAATGTGATATCTATAAGTTAAATCCTAACGATCTTGCAAGCGCACTCTCACCGTATCTCCTCCTCCTCTTCCTCTCCGCTTCCGTCCTCTTCTCCGCTTCCGTCCTCTTCTCCGCCACCACCGCCACCGACCACATCGTCGGCGACAACCGCGGCTGGAATCCCGGCGTCAACTACACGCTCTGGGCCGGAAATCACACCTTCTACGTCGGAGATCTCATCTCCTTCAGGTACCAGAAAACCACCTACAATGTCTACAGGGTCAATGAGACCGGGTAC…	MTQKPNFPPGYRFVPTDAELLLYYLKNKNLGRPLPADIIPECDIYKLNPNDLASALSPYLLLLFLSASVLFSASVLFSATTATDHIVGDNRGWNPGVNYTLWAGNHTFYVGDLISFRYQKTTYNVYRVNETGYDNCTTEGALGNWSSGKDFISLDKAKRYYFICGNGFCFSGMKVTVLVHPLPPPPAASVSEDHKNGGEAVFRRGWAVFRVVLSVMTVSIGWVIGELI	228	Plastocyanin-like domain	GO:0005575,GO:0005622,GO:0005623,GO:0005737,GO:0005773,GO:0005886,GO:0016020,GO:0031224,GO:0031225,GO:0031226,GO:0043226,GO:0043227,GO:0043229,GO:0043231,GO:0044424,GO:0044425,GO:0044444,GO:0044459,GO:0044464,GO:0046658,GO:0071944
MsNAC12	evm.model.ctg163.24	evm.TU.ctg163.24	PF02365.20	No apical meristem (NAM) protein	Chr11	-	82924456	82926267	ATGGAATCCCAAGTAGCTTCAAAAGGACGGATGGAAGAAGAATGGAAGCTTTCCATCCCCATTGGAATCAAATTCCAGCCAAACGACGTAGAGCTGATTGACTATCTCTTTCGAAAAGTATATCGAATGCCGATCTATCCAGGGATTGTTGCTGAAGCTAATGTCTACAACTACGATCCAGCAGATCTTAGAGATATCAGCTTTGACCATGGCGATGGTGTATTCTATTTCTTCACCCCTACATACAGAAGATGCCGTGGTGGAAATAGACCTAATCGAAAGGCTGCAGGCAGAGGATATTGGAAAGCGAATGGAAGCGAACAACCAATAAAAGATTCTTGCAACAAGGTGGTAGGAAGCAAGAGAATGCTGGTTTTCTTTTATGATAAACCTTGTGAC…	MESQVASKGRMEEEWKLSIPIGIKFQPNDVELIDYLFRKVYRMPIYPGIVAEANVYNYDPADLRDISFDHGDGVFYFFTPTYRRCRGGNRPNRKAAGRGYWKANGSEQPIKDSCNKVVGSKRMLVFFYDKPCDKDIKKSKTKWIMYEYKLPTDINPFIHYNEGIEMLDTMVLCKIYYKKESALHQRQQGEQQQQQQQQHHHHHHHQQQQQQERLQSEPAPSMTQLPPNSKLDDDNFFLYCEELSPLLPLWA	251	No apical meristem (NAM) protein	-
MsNAC13	evm.model.ctg164.231	evm.TU.ctg164.231	PF02365.20	No apical meristem (NAM) protein	Chr11	+	89581614	89586635	ATGGAGGGAGCTCCGACGAAGGAGGAGACGTTACCTCCCGGTTTTCGATTTCATCCCACCGATGAAGAACTCATCACATACTATCTGACCCACAAGATATCGGATTCCAGTTTCACCGGACGGGCGATCGCTGACGTTGATCTCAACAAATGTGAACCGTGGGATCTTCCAAGCAAGGCGAAAATGGGAGAAAAGGAGTGGTATTTCTTCAGCCTTCGGGACCGGAAATATCCGACAGGCGTTCGGACGAACCGCGCGACGAATGCCGGCTACTGGAAAACGACAGGCAAAGACAAGGAGATCTTCAACAGCGTCACGTCGGAGTTAGTCGGAATGAAGAAGACGCTCGTGTTCTATAGAGGAAGAGCTCCAAGAGGAGAGAAAACAAACTGGGTCATG…	MEGAPTKEETLPPGFRFHPTDEELITYYLTHKISDSSFTGRAIADVDLNKCEPWDLPSKAKMGEKEWYFFSLRDRKYPTGVRTNRATNAGYWKTTGKDKEIFNSVTSELVGMKKTLVFYRGRAPRGEKTNWVMHEYRCHSKSAYKTTKDEWVVCRIFQKSSGVKKYSSTQSRTNPYHLDMAPNNILPSMMQGDISHFGPGRGYVHNTDLAELNRVLRGSSSANLPIQPQFNYPGAFTLSGLNLNLGASAPQVVRAPPAIQNQPMMATNGPPTMMGGCVQVTDNGICSDMNPSGNNRYQQMDPCVDLDGYWPPY	313	(NAC) domain-containing protein	-
MsNAC14	evm.model.ctg167.14	evm.TU.ctg167.14	PF02365.20	No apical meristem (NAM) protein	Chr12	+	961231	963833	ATGTCGAATCCTGAAACATGCTTACCACCAGGTTTCAGGTTCCACCCAACAGATGAAGAGCTGATCCTTCACTACCTGAAGAAGAAAGTGGGATCGAGCCCATGTCCGGTATCCATCATAGCAGAAGTAGACATCTACAAGTTCGATCCATGGGACCTTCCTGCTAAAGCGGCGTTTGGTGAAAAAGAGTGGTATTTCTTCAGCCCAAGAGATCGTAAATACCCGAACGGGGCTCGACCCAACAGGGCGGCTGTGTCTGGTTACTGGAAGGCGACGGGAACAGACAAGCTGATAATGACTAAAGGAAGGAATGAGAATATAGGAGTGAAGAAGGCTTTGGTTTTCTATGAGGGTAGACCACCTAAGGGTTTAAAAACTGCTTGGATAATGCATGAATAT…	MSNPETCLPPGFRFHPTDEELILHYLKKKVGSSPCPVSIIAEVDIYKFDPWDLPAKAAFGEKEWYFFSPRDRKYPNGARPNRAAVSGYWKATGTDKLIMTKGRNENIGVKKALVFYEGRPPKGLKTAWIMHEYRLSESKYSIRNKPIKSKDTSMRLDEWVLCRIYRKGPPLSTYSQQQEDPLIQEIPNQTNLPIQKSASFSDLLSSADFSLLSRFLLDNQSDSTPSQLTHIFNNSNLYQPNNNSSITTNNNHNNNNSSSSTTTTTNNNSSYSLQQVTMDNQFNPQPPASVTTTVTGEGVLSHPCKKFNNTCTFTNMINQLDTSQYHPLFNHQQILLNSHLQFQSM	345	NAC transcription factor	GO:0000003,GO:0001101,GO:0003006,GO:0003674,GO:0003676,GO:0003677,GO:0003700,GO:0005488,GO:0005575,GO:0005622,GO:0005623,GO:0005634,GO:0006355,GO:0006521,GO:0006950,GO:0007275,GO:0008150,GO:0009413,GO:0009415,GO:0009628,GO:0009790,GO:0009791,GO:0009793,GO:0009889,GO:0009891,GO:0009893,GO:0010035,GO:0010154,GO:0010364,GO:0010365,GO:0010468,GO:0010556,GO:0010565,GO:0010817,GO:0019219,GO:0019222,GO:…
MsNAC15	evm.model.ctg167.17	evm.TU.ctg167.17	PF02365.20	No apical meristem (NAM) protein	Chr12	+	1117015	1119091	ATGGAAATGGGTGTTGAGGGTGCAAGCATGGGAGAAGTTTCAGTTATTGCAAAAGGAGAAGAGTGTATAGATCTGCCACCTGGTTTTAGGTTTCATCCCACAGATGAAGAGATCATAACCCACTATCTTACAGAGAAGGTCTTGAATACCTGCTTCAGCGCAAGAGCCATAGGAGAGGTAGATTTGAACAAGTGCGAGCCTTGGGATCTACCAAGTAAGGCTAAGATGGGAGAGAAGGAATGGTACTTCTTCTGTCAGAGAGATAGGAAGTATCCAACAGGCATGAGAACAAATAGGGCTACAGAAGCTGGGTATTGGAAGGCAACAGGCAAGGATAAGGAGATTTACAAAGGAAAAGGTTGTCTTGTTGGGATGAAAAAGACTCTTGTTTTCTATAGG…	MEMGVEGASMGEVSVIAKGEECIDLPPGFRFHPTDEEIITHYLTEKVLNTCFSARAIGEVDLNKCEPWDLPSKAKMGEKEWYFFCQRDRKYPTGMRTNRATEAGYWKATGKDKEIYKGKGCLVGMKKTLVFYRGRAPKGEKTNWVMHEYRLEGKFSYYNLPKTAKDEWVVCRVFHKSTGVKRNPISGLLRMNSFEDDLMDSPSMPPLLDTPFFNPNRPSTSFFSDDDDFKGTSTLAASRPSNGIHLSYLSTAMNNQQDDKIFLPNHYSNLNQQGNPCVPSTNSIIYPQISHPNHILSLPGSANFGYLHQVRNNPTPSFPTSGFKAPDLAMLRALAATQESSGLRTQCKLEQFSNQSMVSQDTAASTDVNTEISSVISKHDQIDRNGCDDNLDGTSSDGP…	408	(NAC) domain-containing protein	GO:0003674,GO:0003700,GO:0005575,GO:0005622,GO:0005623,GO:0005634,GO:0005737,GO:0006355,GO:0008150,GO:0009889,GO:0009893,GO:0009894,GO:0009896,GO:0010271,GO:0010468,GO:0010556,GO:0019219,GO:0019222,GO:0031323,GO:0031325,GO:0031326,GO:0031329,GO:0031331,GO:0043226,GO:0043227,GO:0043229,GO:0043231,GO:0044424,GO:0044464,GO:0048518,GO:0048522,GO:0048831,GO:0050789,GO:0050793,GO:0050794,GO:0051094,GO:…
MsNAC16	evm.model.ctg167.8	evm.TU.ctg167.8	PF02365.20	No apical meristem (NAM) protein	Chr12	-	747386	748920	ATGGAGAGGAAAAGAGATGCAGAAGCTGAACTAAACCTGCCACCCGGATTCCGATTCCACCCGACCGATGAGGAGCTCATTGTTCATTATCTCTGCCACAGAGTCATGCACCAGCCTCTCCCCGTTCCCATCATTGCCGAAGTTGATCTCTACAAATACGATCCTTGGCAACTTCCTGAGAAGGCTTTGTTCGGACAGAAAGAGTGGTACTTCTTCACGCCAAGGGATCGCAAGTATCCCAACGGTTCCAGGCCCAACAGGGCAGCAGGAACCGGATACTGGAAAGCTACAGGTGCTGATAAACCCATCAGACCAGCAGGAAGCATCAAGCATGTGGGCATTAAGAAGGCTTTGGTTTTCTATGCTGGGAAAGCACCCAAGGGAATCAAGACTAATTGG…	MERKRDAEAELNLPPGFRFHPTDEELIVHYLCHRVMHQPLPVPIIAEVDLYKYDPWQLPEKALFGQKEWYFFTPRDRKYPNGSRPNRAAGTGYWKATGADKPIRPAGSIKHVGIKKALVFYAGKAPKGIKTNWIMHEYRLMDPNSPNNRKGSLRLDDWVLCRIYNKKNSYERIVQQNEETSLEETMDSFEAIEDIGSARTPESDVDNNSFLELDNLGRTKGYTSQGPDGVQAVRIDMMGTFQKGECLKEDNEWLMNLNLDDLQNSLATHGGTSMQDLTNQDFFFSGLCSPQFKTCQNQMLPF	302	(NAC) domain-containing protein	GO:0003674,GO:0003676,GO:0003677,GO:0005488,GO:0005515,GO:0006355,GO:0008150,GO:0009889,GO:0010468,GO:0010556,GO:0019219,GO:0019222,GO:0031323,GO:0031326,GO:0042802,GO:0042803,GO:0043565,GO:0046983,GO:0047484,GO:0048518,GO:0048583,GO:0048584,GO:0050789,GO:0050794,GO:0051171,GO:0051252,GO:0060255,GO:0065007,GO:0080090,GO:0080134,GO:0097159,GO:1901000,GO:1901002,GO:1901363,GO:1902584,GO:1903506,GO:…
MsNAC17	evm.model.ctg178.78.1	evm.TU.ctg178.78	PF02365.20	No apical meristem (NAM) protein	Chr13	+	2259420	2266661	ATGAGTCCGCTGGCACCTGTCTCTCCACCTTATATCGACTTAGATGCAGATGATGCGGATATGATGATGCATTTGAAGAGTATCGAACATGGGGATGCTTGCCCTCGTAACGTGATTATAGATCTGAATCCTCAAACTGTTGCACCCGAAAATTTGCCTCCGAATATGTTGTTCCTTTGCAATTTGGAGGAGGGAGTTGAAGCACAGGGTGGATACTGGAAGCTCATGAGGCAAGACCCAATAATATCGAAGAATTCTCCTACTGTAGGTTCGAGGACTACTTTGAAATTCTATACTGGACAAGCTCCCAATGGATATGGAACTGATTGGGTTATGCATGCATACACGATGGAACCAAACGGTTCCAGTTCATTATGTAGAGTTTTTTTGGATGATGGT…	MSPLAPVSPPYIDLDADDADMMMHLKSIEHGDACPRNVIIDLNPQTVAPENLPPNMLFLCNLEEGVEAQGGYWKLMRQDPIISKNSPTVGSRTTLKFYTGQAPNGYGTDWVMHAYTMEPNGSSSLCRVFLDDGRRLNNVEPEPHNQDDTDIDIQQVLMNWLEAEENETTNSSQVVSRREHGEYHPEDYDLLTGNYLEVNDLLTPSSISESTCIASMTSDECFNSGGLMFDPETGNTTAGVPNMEQQHADCRFNVSVSQGSQRMVIQQPPSGSLHSNNNPQTKEIMASATMPKRLRVADAPLPITASLEAQPNLKAPNHGPKRNMVNESPSNPRGGTSHHGREERKTAARIAKLRRKYCCFFPI	363	No apical meristem (NAM) protein	GO:0003002,GO:0003674,GO:0003700,GO:0005575,GO:0005622,GO:0005623,GO:0005634,GO:0006355,GO:0007275,GO:0007389,GO:0008150,GO:0009832,GO:0009834,GO:0009889,GO:0009987,GO:0010453,GO:0010455,GO:0010468,GO:0010556,GO:0019219,GO:0019222,GO:0022622,GO:0031323,GO:0031326,GO:0032501,GO:0032502,GO:0042546,GO:0043226,GO:0043227,GO:0043229,GO:0043231,GO:0044085,GO:0044424,GO:0044464,GO:0045595,GO:0045597,GO:…
MsNAC18	evm.model.ctg178.79	evm.TU.ctg178.79	PF02365.20	No apical meristem (NAM) protein	Chr13	+	2299447	2305218	ATGTGTCCGTCGGCACACGTCTCTCCACCTTGTATCGACTTGCATGCAGATGATGTGGAGATGGTGATGCATTTGGAGAGAATGCAACGTGGGGATCCTCCCCCTTCTAATGTGATTACAGATTTGAATCCTTACACAGTTGTACCCAATAATTTGCCTGAGAAGATGTTGTACCTTTGCAATTTGGAGCACCCAAGAGCCGAAGCTAGACAGGAGGGATACTGGCAGCCCAGGGGGGAAGACCATAGAATATTGACAAATTCTCCTACTGTAGGTTGGAAGACTACTTTGGAATTCCATACTGGACAAGCACCTGATGGAGAAAAAACTGATTGGATGATGCATGTGTACAGGATGGGACAAAGGGGTTCCAATTTGTTATGCAGAGTTTTTCTCAAT…	MCPSAHVSPPCIDLHADDVEMVMHLERMQRGDPPPSNVITDLNPYTVVPNNLPEKMLYLCNLEHPRAEARQEGYWQPRGEDHRILTNSPTVGWKTTLEFHTGQAPDGEKTDWMMHVYRMGQRGSNLLCRVFLNDGQTLNNVELEPHSQGDTEVDVEGTLMYMLETEENETTNSSQVVGRKEHGQPDVSTNHPHDMGLDRLPQYPPEGYDFSAGDYLELNDLLMSSISESTCIASMTSDEYFDSEALMCDLEAGNITASISNMEQWHDSCRFNVSASQGLHQMVIQPPPSGSLHGNNNPQAKETMASTTMSKRLRVPDAPLPVTASLDPQPNLNAPNHLPNVNMANEGGTTQLSSQ	355	NAC domain-containing protein	GO:0003674,GO:0003700,GO:0005575,GO:0005622,GO:0005623,GO:0005634,GO:0005737,GO:0006355,GO:0008150,GO:0009314,GO:0009416,GO:0009628,GO:0009642,GO:0009644,GO:0009889,GO:0009891,GO:0009893,GO:0009962,GO:0010468,GO:0010556,GO:0010557,GO:0010604,GO:0010628,GO:0019219,GO:0019222,GO:0031323,GO:0031325,GO:0031326,GO:0031328,GO:0043226,GO:0043227,GO:0043229,GO:0043231,GO:0044424,GO:0044464,GO:0045893,GO:…
MsNAC19	evm.model.ctg178.80	evm.TU.ctg178.80	PF02365.20	No apical meristem (NAM) protein	Chr13	+	2368979	2376793	ATGCGTCCGTCAGTGCTTGTCTCTCCACCTTGTATCGACTTAAATGCAGGTGATGTGGAGATGGTGATGCATTTGGAGCGAATGCATCGCGGGGATCCTCCCCCTGTTAACGTGATTACAGAAGTGAATCCTTACACAGTTGCACCCAAGAATTTGCCTGAGAGGATGTTGTACCTTTGCAATTTGGAGGACCCAAGAGCTGAAGCTAGACTGGAGGGATACTGGCAGCCCAGGGGGAAAGACGATAGAATATCGACGAATTCTCCTACTGTAGGTTGGAAGACTACTTTGGAATTCCATACTGGACAAGCTCCCAATGGAGTAAAAACTGACTGGTTGATGCATGAGTACCGGATGGGACAAAGGGGTTCCAGTTCGTTATGCAGAGTTTTTCTCAAT…	MRPSVLVSPPCIDLNAGDVEMVMHLERMHRGDPPPVNVITEVNPYTVAPKNLPERMLYLCNLEDPRAEARLEGYWQPRGKDDRISTNSPTVGWKTTLEFHTGQAPNGVKTDWLMHEYRMGQRGSSSLCRVFLNNGSQGDTEVDVEGLLMHMLETEDNETTNSSQVVSRKEHGQPDVSTNHPHDMGLDHIPLNPPEGYDFSTEDYLELDDLLTSSSISESTCIASMTSDDYFDSEALMCYLETENMTANVPNTEQRHDDCRFNVSASQGPHQMVIQPPPSGSLRSNNNLQTKETMVSATMPKKLRVRDAPPHIAASIEPQPNLKVQNHGPKVNMANEGPSNERGRTSHHARGERKTAGWMAKLRRRYCCFFPI	372	NAC domain-containing protein	GO:0003674,GO:0003700,GO:0005575,GO:0005622,GO:0005623,GO:0005634,GO:0005737,GO:0006355,GO:0008150,GO:0009314,GO:0009416,GO:0009628,GO:0009642,GO:0009644,GO:0009889,GO:0009891,GO:0009893,GO:0009962,GO:0010468,GO:0010556,GO:0010557,GO:0010604,GO:0010628,GO:0019219,GO:0019222,GO:0031323,GO:0031325,GO:0031326,GO:0031328,GO:0043226,GO:0043227,GO:0043229,GO:0043231,GO:0044424,GO:0044464,GO:0045893,GO:…
MsNAC20	evm.model.ctg185.156	evm.TU.ctg185.156	PF02365.20	No apical meristem (NAM) protein	Chr13	-	73829797	73830811	ATGAAACCTATGTTGAAATTCCCTCCAGGTTATCGCTTCCTTCCCACCGACTCTGAATTATTAGTACATTATCTTAATAATAAGAATCTAGGTCTTCCACTCCCCGCTCAAGTAATCCAAGAAATCGATATCTACAGCTTCAATCCTGATGATCTTGCAAGTCGGTTTGCGGTTGAAGAAGAGAAGGACATGTATTTTTTCACAGAAAGGAATCGTAAGTATGAGGGTGGATCACGACCAGCTCGGAAAGCAGGAAACGGATACTGGAAGGCTACTACCGGACATACAACGGTTCTTGATCAAGATAAAGTAGTTGGGTATAAAATGAATTTGAAATTCCACGTTGGTACGGCACCTAAAGGGATGAAAACAGATTGGTTGATGACAGAGTATAGGATC…	MKPMLKFPPGYRFLPTDSELLVHYLNNKNLGLPLPAQVIQEIDIYSFNPDDLASRFAVEEEKDMYFFTERNRKYEGGSRPARKAGNGYWKATTGHTTVLDQDKVVGYKMNLKFHVGTAPKGMKTDWLMTEYRIDQVDPPTTTTETEARKRKKKMVAATQEDHHIRMNGFVLCRIYKHKSGAKKTNETAVNEVIEEDCTSYMAPCYEDDQVNIIDYKCMHSLSWDMIFDEITPEVDRLINIPWDNNEYLPPLTLSEFNDPSPFDVMPTI	268	NAC domain-containing protein	-
MsNAC21	evm.model.ctg185.179	evm.TU.ctg185.179	PF02365.20	No apical meristem (NAM) protein	Chr13	-	74462227	74466359	ATGGCTATGGTTAGTCGTAGCCCCTACTTTTTCGATATGTCTTTGATATGTATCGAAGGTCAGTTTGCGGTTGAAGAAGAGAAGGACATGTATTTCTTCACACAAAGGAATCGAAAGTATGAGGGTGGATCACGCCCAGCTCGGAAAGCAGGAAACGGCTACTGGAAGGCTACCACCGGACATACGACGGTTCTTGATCAAGATAAAGTAGTTGGATATAAGATGAATTTGAAATTCCATGTTGGTACGGCACCTAAAGGGAAGAAAACAGATTGGCTAATGACAGAGTATAGGATGGAGGAGGTTGATCTTCCTACAACAACGGGTACTGCTACTGAGGCTGGCAATGGAAAGAGAAAGAGGAAAATGGTGGCTGCAACTCAGGAGGATCATCACATA…	MAMVSRSPYFFDMSLICIEGQFAVEEEKDMYFFTQRNRKYEGGSRPARKAGNGYWKATTGHTTVLDQDKVVGYKMNLKFHVGTAPKGKKTDWLMTEYRMEEVDLPTTTGTATEAGNGKRKRKMVAATQEDHHIRMNGFVLCRIYKHKSGAKKTKEDCTSYMAPCYEDDQTNIIDYNCMHSPSWDMIFDEITPEVDRLINIPWDNNEYLPPLTLSDFNDPSPFDVIPTI	228	NAC domain-containing protein	GO:0001101,GO:0003674,GO:0003700,GO:0006355,GO:0006950,GO:0007154,GO:0007165,GO:0008150,GO:0009414,GO:0009415,GO:0009628,GO:0009719,GO:0009725,GO:0009753,GO:0009755,GO:0009867,GO:0009889,GO:0009987,GO:0010033,GO:0010035,GO:0010468,GO:0010556,GO:0019219,GO:0019222,GO:0023052,GO:0031323,GO:0031326,GO:0032870,GO:0042221,GO:0050789,GO:0050794,GO:0050896,GO:0051171,GO:0051252,GO:0051716,GO:0060255,GO:…
MsNAC22	evm.model.ctg185.194	evm.TU.ctg185.194	PF02365.20	No apical meristem (NAM) protein	Chr13	+	75032470	75039995	ATGAAACCTGTGTTGAAATTCCCTCCAGGTTATCGCTTCCTTCCCACCGACTCTGAATTATTAGTACATTATCTTAATAATAAGAATCTAGGTCTTCCACTCCCCGCTCAAGTAATCCAAGAAATCGATATCTACTACTTCAATCCTGATGATCTTACAAGAAAGGGGACCACACCACAGAAGGCTCATGCATGTGTCACTTACCACATTTTATGGGTATGGATGGAGGGAGCGTGTCAATCAAAAGGCTCCATGACCCATCATGATGTGGCAACATGTACTCCGTCCATCATTTCTGAAATATGA	MKPVLKFPPGYRFLPTDSELLVHYLNNKNLGLPLPAQVIQEIDIYYFNPDDLTRKGTTPQKAHACVTYHILWVWMEGACQSKGSMTHHDVATCTPSIISEI	101	NAC domain-containing protein	-
MsNAC23	evm.model.ctg185.195	evm.TU.ctg185.195	PF02365.20	No apical meristem (NAM) protein	Chr13	+	75061289	75062780	ATGCAAGCCTGGTCTGCTCCGGGATACCCAATTCTAGTGGGTAAGTTTCCGGCTGAGCGGGAGAACATGTACTTCTTTACACAGCTGAATCTTATAAATGATGGTGGGTCGCGTGCAAAACGCCAAGCAAAAGACGGTTTTTGGGTACATAAAAATGCTGAGAACTCAATTGGTTATAAGAAGAGTACTTTGAACTTCCACAAGGGTGTGAAGTCCAAAGGAAAGAAAACCAATTGTATAGATCATGAGCAGCCCGAACCAGTGAAAACTGATTGGCTGATGAAAGAGTATAGGCTCGATGAGATGAAAGAATATGTTCTTTGTCAAATTTACAAGAAGAATAAAGCTGAGAAAACTAATAAAGCAACTACCAATCAAATTGATAAGAAAGAGAGGGTA…	MQAWSAPGYPILVGKFPAERENMYFFTQLNLINDGGSRAKRQAKDGFWVHKNAENSIGYKKSTLNFHKGVKSKGKKTNCIDHEQPEPVKTDWLMKEYRLDEMKEYVLCQIYKKNKAEKTNKATTNQIDKKERVAKKTTKDPIDEVNTEERAPCFTPDQPNIINNERLRTTPDIFADLGDIITDDSYQFDYYPDF	194	#N/A	#N/A
MsNAC24	evm.model.ctg185.207	evm.TU.ctg185.207	PF02365.20	No apical meristem (NAM) protein	Chr13	+	75353008	75372192	ATGACGCCTCTGTCTAGGGTTGATGGCCAGCTGATTTCATCATCCTCCGAAAAAGTACCAGTAGGCTGGCGTTTTATCCCGACGGACGTGCAAATTTTGGCGCATTTTCTTCCGAAAAAGAATGGAGACCATGCATATTCGGCAGAACCCATTCAAGAATCAGATATCTACGGGTGCAGTCCCGATGAGCTTGCGAGTAAGGAACCCTCTCTCTTTCAAGGTGGAGGGGACGCCATGTACTTCTTTACACCGCTGAATCATGAGGGTGGGTTGCGCAAGGCTCGCAAAGCCGGAGACGGTTCCTGGAAGGCCACCGACGGACGTAAACCTGTTGAGCACCAAGGGAAAGTAATTGGTTGGAAGATGAATTTGAAATTCTACAAGGGCAGCGGGCCCAAT…	MTPLSRVDGQLISSSSEKVPVGWRFIPTDVQILAHFLPKKNGDHAYSAEPIQESDIYGCSPDELASKEPSLFQGGGDAMYFFTPLNHEGGLRKARKAGDGSWKATDGRKPVEHQGKVIGWKMNLKFYKGSGPNAEKTNWLMTEYTTDKDDLPTMKTTTKAGRENVEGKDDHRNRMTEFVLYQIRKKMGAKKTNDAPSIKVTAKDATSNRIDKVNPPTMKTTTKADYGNGKRMIKDDTQNKKRVVKKTKKTLINKVIIEDYTSYRIDNIDSPTIKTTIEAGCGNMKRMTATEDDPQEKRVAKKTKKAPMINEVTMEDHTSYRIDKVNPPIMKTTTEAGCGNRKRMAGIHVDHGKQMNDFVTYENHKNEMVAQKSNKAPINEVTAELQASNLALEDETNII…	539	No apical meristem (NAM) protein	-
MsNAC25	evm.model.ctg185.211	evm.TU.ctg185.211	PF02365.20	No apical meristem (NAM) protein	Chr13	+	75497046	75499941	ATGACGGATCTGGTACCGTTCCACAGCCCTCCCCAAGTCCTCCCACAAGAACTGCACGAACCACACACTGTCCTTCTCCTTCACCTTGTCTGCGAAGGTAAGTATCAGGTTGAAGGGGAGAACATGTACTTCTTTACACAGCTGAATCTTCAGCATTATGGTGGGTCGCGTGCAAATCGCCAAGCAAAAGACGGTTTTTGGGTGTCTTCTGATGGATATAAACATGTTGAGAATCCAGGAAACCCACTTGGTTATAAGAAAATTACTTTGAACTTCTGCAAGGGTGTGAAGTCCAAAGGAAAGAAAACCCATTGTACAGATCATGAGCAGCCCAAACCAATGAAAACTGATTGGCTGATGAAAGAGTATAGGCTCGATGAGGCAAAGCCTCCCACCGTG…	MTDLVPFHSPPQVLPQELHEPHTVLLLHLVCEGKYQVEGENMYFFTQLNLQHYGGSRANRQAKDGFWVSSDGYKHVENPGNPLGYKKITLNFCKGVKSKGKKTHCTDHEQPKPMKTDWLMKEYRLDEAKPPTVETTVEACGQKGKRVAETQDDNPKKMKKYVLCQIYKKSKAEKTNKATTNQIDKKKRVAKNTTKDLIDKVITKERTSYFTPDQPNIINNKCLPTTPGMQIYSQEHSFTDIVWEDYFTPDQTNITTN	257	#N/A	#N/A
MsNAC26	evm.model.ctg185.44	evm.TU.ctg185.44	PF02365.20	No apical meristem (NAM) protein	Chr13	+	68976179	68986929	ATGGAAGAAAGATTAGGTATATCTAGAGAGGAGAAGAAAAAGGAAAGGTTGGATAGAGATTATCCAGCAGGATATAGGTTCTGGCCCACTGATCTTGAGATCATCCGTGATTACCTTGTTAAAAAGAACCTTGGTCAACCTCTTCCACCTAATATTATCGGTGAAGTCGAGTTGTACAATCATAGCCCAGATGACCTTATACGTGAACATCTCACCATGCATGGAACGGAGAGGGATGCAGATTGCTTGTCGAGTAGGAGAAACAAAGAGTGCTACTTCTTTACTTCCAGAGATGGAAAATACAAGAAAGGATATCGTCCCAATCGGGATGCTGGAAACGGCTTTTGGAAAGCTACGGGTGCAGATAATCCTATCATCGATGAGAATGGTGTTGATACT…	MEERLGISREEKKKERLDRDYPAGYRFWPTDLEIIRDYLVKKNLGQPLPPNIIGEVELYNHSPDDLIREHLTMHGTERDADCLSSRRNKECYFFTSRDGKYKKGYRPNRDAGNGFWKATGADNPIIDENGVDTGWVKKSLVYYRGNHKASEKSNWIMHEYRLKESPEPVVRTDDNMRLDGWVLCRIYEKNEKKDSSDNLNEVQNDGRNAVISNEEQDDEANSITSNNDNFMEFIDFSANYIEDGGEHPKSDAGLMTAAVNPISAIPSCSYQPENDLLFNVYSGEDEYLMYILNSPTKPPSQNLPPLDQQPELINSLTESQAIGSHDSLTESQALGSHDRNQVPRGSNKWTSNGLFGVFQRTFRTHGAKKEEPKSL	375	NAC domain-containing protein	-
MsNAC27	evm.model.ctg185.47	evm.TU.ctg185.47	PF02365.20	No apical meristem (NAM) protein	Chr13	-	69246323	69255339	ATGGAAGAAAGGGTAGGAATAAAGAGAGAAAGAGAGGAGGAGCGATTCGATAGATGTTATCCCCCAGGCTATAGATTCTGTCCAACTGATCTTGAGCTCATCTTTCATTACCTTCTGAAGAAAAACCTCGGCCAACCTCTCCCTTCTAATATCATCGGTGAAGTAGACTTCTACAATTACAGTCCAGATGAACTTGTATGTGCATATCACACCATGCATGGGACGGAGAGCCATACAGATTACCAGTCGAGTAGGAGAATAAGAAAAGAATGTTACTTCTTTACCTCTAGAGATAGAAAATACAAAAATGGACGGCGTCCCAATCGGAGTGCTGGAAATGGCTACTGGAAAGCTACTGGTTCAGATAATCCCATCACTGATGAGAATGGTTTGGATACT…	MEERVGIKREREEERFDRCYPPGYRFCPTDLELIFHYLLKKNLGQPLPSNIIGEVDFYNYSPDELVCAYHTMHGTESHTDYQSSRRIRKECYFFTSRDRKYKNGRRPNRSAGNGYWKATGSDNPITDENGLDTGWVKKALVYYRGGHKVSTKTNWSMIEYRLKELSDTKTRSSDGNMRLDGWVLCRIYERSEKKNTNGNPNEVEDEETNAIISNEVQDEETNAIISNEVQEGANSTISYNDNYDEWEEWINSVDFEGESAAICTEDSSEYPKSEVGLTTTGVNPLVAKESYSYPPGFLFPDYLPFDNYSGEDEMLGCTVHSSIPPSQDSSALDYNPEFINYVTNLQALGIHDRNQVPRGLNEWTINDSFGTLQDRHLGPMGSYRKKHKYL	390	NAC domain-containing protein	-
MsNAC28	evm.model.ctg189.14	evm.TU.ctg189.14	PF02365.20	No apical meristem (NAM) protein	Chr14	+	2729839	2731056	ATGGAAAGCACCGACTCATCATCCGGCTCACAGCAGCCTCACCTGCCACCGGGTTTCCGTTTCCACCCAACAGACGAAGAGCTGGTGGTTCACTACCTGAAGAAGAAGGTATCTTCTATTCCTCTCCCAATACCGATTATAGCCGAAATCGAACTCTACAAGTTCGATCCATGGGAGCTTCCAGGTAAGTCGAATTTCGGAGAGCATGAGTGGTATTTCTTCAGCCCCAGAGATCGAAAATACCCAAATGGCGCTCGGCCTAATCGGGCCGCAACATCGGGCTACTGGAAGGCAACTGGAACTGATAAGCCTATATTAACAGCTGGAGGGACTCAGAAGATTGGAGTGAAGAAGGCGTTAGTCTTTTATGGAGGAAGGCCACCGAAAGGAATTAAAACT…	MESTDSSSGSQQPHLPPGFRFHPTDEELVVHYLKKKVSSIPLPIPIIAEIELYKFDPWELPGKSNFGEHEWYFFSPRDRKYPNGARPNRAATSGYWKATGTDKPILTAGGTQKIGVKKALVFYGGRPPKGIKTDWIMHEYRLTENDNKVMKPPCAEVASKKSSLRLDDWVLCRIYKKNSQRAIERIKDDSMDEMLEKLPTATQAQHSQNAQAHKTTNFRSLIDNDEQFFEGILTDDGMNSNHISHLASSSRSKPELSILLAGGPLTLKRTVTSPYWTDPMPATPPTKRFHSNDSSTDGNSSMTALLNQLPQTDPFQHQTLLGSLGDGVLMQQYQNSGMNWNS	342	NAC domain-containing protein	GO:0000003,GO:0001067,GO:0001101,GO:0003006,GO:0003674,GO:0003676,GO:0003677,GO:0003700,GO:0005488,GO:0005575,GO:0005622,GO:0005623,GO:0005634,GO:0006355,GO:0007275,GO:0008150,GO:0009555,GO:0009653,GO:0009719,GO:0009725,GO:0009753,GO:0009791,GO:0009888,GO:0009889,GO:0009908,GO:0010033,GO:0010154,GO:0010468,GO:0010556,GO:0019219,GO:0019222,GO:0022414,GO:0031323,GO:0031326,GO:0032501,GO:0032502,GO:…
MsNAC29	evm.model.ctg195.174	evm.TU.ctg195.174	PF02365.20	No apical meristem (NAM) protein	Chr14	-	53230170	53234202	ATGGCGCCTGTTCTCCCTCCTGGTTTTCGTTTCCACCCCACCGACGAGGAACTAGTGGCCTACTATCTCGACAGGAAGATCAGTGGCCGGACGATAGAGCTTGAAATCATCCCAGTCGTTGATCTTTACAAATGTGAGCCTTGGGACTTGCCAGGTAAATCCTTTTTACCTAGCAAGGATATGGAGTGGTACTTCTTTAGCCCACGAGATCGAAAGTATCCAAATGGCTCGAGAACGAATCGTGCAACCAAAGCCGGGTACTGGAAGGCGACGGGCAAGGACCGCATGGTGCAATCTAACAAGTGCCCAGTCGGTATGAAGAAGACTTTGGTCTATTACAGAGGCCGCGCTCCTAATGGCATCCGTTCTAACTGGGTGATGCATGAGTATCGACTCATG…	MAPVLPPGFRFHPTDEELVAYYLDRKISGRTIELEIIPVVDLYKCEPWDLPGKSFLPSKDMEWYFFSPRDRKYPNGSRTNRATKAGYWKATGKDRMVQSNKCPVGMKKTLVYYRGRAPNGIRSNWVMHEYRLMDSEWDVTMPLKDAFALCRVFKKNVCKPKMDDPQGVIFTDESSWVPNDYLLGDDDTSYGNVICRREFGEENYEMDDSKFPSDASSSEVTQGSPFDNAMTYNLQGCFAAIDEANSSTNVSPFRVESTSNPTKKDIRVPYYPSLQQEFSYPPLVLEDFPQMDTMEGKSHNTHIMEECIMYDKYNEASILEDIFYGGCSSQENSTNLAFQDSSYPDNLNHHEIDQ	354	NAC domain-containing protein	GO:0003674,GO:0003700,GO:0005575,GO:0005622,GO:0005623,GO:0005634,GO:0005737,GO:0006355,GO:0008150,GO:0009314,GO:0009416,GO:0009628,GO:0009642,GO:0009644,GO:0009889,GO:0009891,GO:0009893,GO:0009962,GO:0010468,GO:0010556,GO:0010557,GO:0010604,GO:0010628,GO:0019219,GO:0019222,GO:0031323,GO:0031325,GO:0031326,GO:0031328,GO:0043226,GO:0043227,GO:0043229,GO:0043231,GO:0044424,GO:0044464,GO:0045893,GO:…
MsNAC30	evm.model.ctg196.307	evm.TU.ctg196.307	PF02365.20	No apical meristem (NAM) protein	Chr14	+	69747567	69753999	ATGAGTTCTTTGGACAAGCAAGAAGGAGAGGTGGTGCTTCCCGGATTCAGATTCCATCCGACCGACGAAGAGCTCGTCGACTTCTATCTACGACGGAAGGTGGAGAAGAGGCCCATCAGCTTAGAACTCATCAAACAGATAGATATCTATAAATATGACCCATGGGATCTTCCTAAGGTGAGCAATGTGGGAGGCAAGGAGAAGGAGTGGTACTTCTATTGCCTAAGAGGGAGAAAGTACAGGAACAGCATCAGGCCCAACAGGGTCACAGGGTCTGGATTTTGGAAGGCCACAGGCATTGATAGGCCTATCTATTCTCCTGGAGAAAAATCTAATGACTGTATTGGGCTGAAGAAATCTCTAGTTTATTACAGAGGAAGCGCTGGAAAAGGCACCAAA…	MSSLDKQEGEVVLPGFRFHPTDEELVDFYLRRKVEKRPISLELIKQIDIYKYDPWDLPKVSNVGGKEKEWYFYCLRGRKYRNSIRPNRVTGSGFWKATGIDRPIYSPGEKSNDCIGLKKSLVYYRGSAGKGTKTDWMMHEFRLPSTAAKNTNILNAKNTQEAEVWTICRIFQRTVSYRKYTPSDWIGPSIKQHPTDSSSKTCSVESDDGDKYKYFDASAIQRFEKKPVIDHIETKDQIFSGQLSSMAQSTVTTFYPGFPTSNTNEFFKEASWDELGAMVGYPIDTDVFSCRYSL	294	Transcription factor JUNGBRUNNEN 1-like	GO:0003674,GO:0003700,GO:0005975,GO:0005984,GO:0005991,GO:0005992,GO:0006082,GO:0006355,GO:0006520,GO:0006560,GO:0006561,GO:0006725,GO:0006790,GO:0006807,GO:0006950,GO:0006970,GO:0006972,GO:0007275,GO:0007568,GO:0008150,GO:0008152,GO:0008652,GO:0009058,GO:0009064,GO:0009084,GO:0009311,GO:0009312,GO:0009403,GO:0009404,GO:0009628,GO:0009651,GO:0009700,GO:0009718,GO:0009812,GO:0009813,GO:0009889,GO:…
MsNAC31	evm.model.ctg197.85	evm.TU.ctg197.85	PF02365.20	No apical meristem (NAM) protein	Chr14	+	76985077	76991685	ATGAGTTTCCTAAGCTTTGTGGAGGCGAAATTGCCTCCAGGATTTAGGTTCCATCCAAGGGATGAAGAGCTTGTATGTGACTACTTAGTGAAAAAGGTCAGCGGCAAAGGCAGCACCAATCCTAGTTCTTATGAAACCCCAGTACTCATTGAAGTCGACTTGAACAAGATTGAGCCATGGGATCTTCCAGATATTGCTTGTGTGGGTGGCAAGGAATGGTATTTCTTCAGTCTCCGGGACCGGAAATACGCGACCGGGCTGCGTACTAACCGTGCGACGTTGTCCGGCTACTGGAAGGCGACCGGAAAAGATCGACCGGTGATCGACGTCCGGACTGGGGCGATCGTCGGCATGCGAAAAACCCTAGTGTTCTATCAAGGAAGAGCTCCAAAAGGGAAG…	MSFLSFVEAKLPPGFRFHPRDEELVCDYLVKKVSGKGSTNPSSYETPVLIEVDLNKIEPWDLPDIACVGGKEWYFFSLRDRKYATGLRTNRATLSGYWKATGKDRPVIDVRTGAIVGMRKTLVFYQGRAPKGKKSEWVMHEFRLEGPSDASKIPLKEDWVLCRVFYKSRGISAKPSQENSYDDTSSSSLPPLLDSFLAFDQTPLNLEGFEQVPCFSNLSQNTTSQTIPQIMPHLPLLEPNMSTMSLAHLVTPPDLATLFNPLQCEKKVIKAVLDHFTKIESNQKMMMVSPGYGEGITESYFPEMGIPTMWDH	312	NAC domain-containing protein 21	GO:0000003,GO:0003006,GO:0003674,GO:0003700,GO:0005575,GO:0005622,GO:0005623,GO:0005634,GO:0006355,GO:0007154,GO:0007165,GO:0007275,GO:0008150,GO:0009653,GO:0009719,GO:0009725,GO:0009733,GO:0009734,GO:0009755,GO:0009790,GO:0009791,GO:0009793,GO:0009888,GO:0009889,GO:0009933,GO:0009987,GO:0010014,GO:0010016,GO:0010033,GO:0010072,GO:0010154,GO:0010468,GO:0010556,GO:0019219,GO:0019222,GO:0022414,GO:…
MsNAC32	evm.model.ctg211.235.1	evm.TU.ctg211.235	PF02365.20	No apical meristem (NAM) protein	Chr16	+	29449120	29477401	ATGGGCAGCAGCAACGAAGCAACATCAGTAGCAGAAGGATCGTTGGCGCCGGGTTTCCGGTTCCACCCAACGGACGATGAGCTGGTGAGCTACTACCTCAAGCGCAAGGTTTGCGGTAAACCCTTACGCGTCGATCCCATCTCCGAGATCGACATCTATCGATCCGAGCCGTGGGATCTCCCTTCTCTCTCCCGCCTCAAGACCCGCGACCTCGAGTGGTACTTCTTCAGCCCCCTCGATAAGAAGTACGGAAACAGCTCCCGCACCAACCGCGCCACCCTCCATGGCTACTGGAAGACTACTGGCAAGGACCGCTCCGTCTGGCACAACTCTCGCACTGTTGGCATGAAGAAGACCCTTGTCTACCATAACGGCCGGGCCCCACGTGGCGAGAGGACC…	MGSSNEATSVAEGSLAPGFRFHPTDDELVSYYLKRKVCGKPLRVDPISEIDIYRSEPWDLPSLSRLKTRDLEWYFFSPLDKKYGNSSRTNRATLHGYWKTTGKDRSVWHNSRTVGMKKTLVYHNGRAPRGERTNWVMHEYRLEDDDLGRTGVAQDAFVLCRIHQKSGSGPKNGEQYGAPFIEEDWDRDELVLKKEPCADEDPMFVVDEQGYVQPDDHEQHPDMAMRNDNVLPAVEFDGNDSFNDLGEPHGHLEGMHDQKFLDFTDENAYLPELHHGQEFLHGPGETSNLPELHDDLVLFGSMGETTNLPELYQMYSPVKDEYVELNDIVNPMEGGCTAGEVVDEGLMYFDAPEHDQPPTGDGSFLELDDLLNPGEVDYASGFERLDDLLMYFDATDDNL…	640	No apical meristem (NAM) protein	GO:0001101,GO:0003674,GO:0003676,GO:0003677,GO:0003700,GO:0005488,GO:0005575,GO:0005622,GO:0005623,GO:0005634,GO:0005737,GO:0006355,GO:0006950,GO:0007275,GO:0007568,GO:0008150,GO:0009314,GO:0009414,GO:0009415,GO:0009416,GO:0009628,GO:0009642,GO:0009644,GO:0009819,GO:0009889,GO:0009891,GO:0009893,GO:0009962,GO:0010035,GO:0010150,GO:0010468,GO:0010556,GO:0010557,GO:0010604,GO:0010628,GO:0019219,GO:…
MsNAC33	evm.model.ctg213.217	evm.TU.ctg213.217	PF02365.20	No apical meristem (NAM) protein	Chr16	+	58196075	58211954	ATGCAATTGCCAGCAGGCTTCCGATTCATGCCCACTGATGAAGAACTAGTCGGCTATTACTTGAAGAAGAAGGCCTCCGGCGAACAAGTTCCGTACACCGAAATCAAGGACGTCGACGATGTCTATAACATCACACCAATGGAGCTTCCAGGCTCAAAAAAAATGAAGCCCATTGGCGATCCAAAAGACCTGTACTTCTACGCAAGAAAGAGAAAAACGACGGATGAATCTTACACTGTGGAAGGACGGGGGATTTGGAGGGTGGATTCAGGAGATCAGAAAATCTTCGACTCTCAAAGAGGATTGGTTATAGGCATCAAGAAAATTCTAGTTTTCGTGGAAGAGCTACCATTGCAGCAGCCTAAGAAAATGAATTCGATAATCCAAGAATCAAACTGG…	MQLPAGFRFMPTDEELVGYYLKKKASGEQVPYTEIKDVDDVYNITPMELPGSKKMKPIGDPKDLYFYARKRKTTDESYTVEGRGIWRVDSGDQKIFDSQRGLVIGIKKILVFVEELPLQQPKKMNSIIQESNWIMEEYRLPQKMDLYLTVIEVPAFHLAL	160	No apical meristem (NAM) protein	-
MsNAC34	evm.model.ctg216.108	evm.TU.ctg216.108	PF02365.20	No apical meristem (NAM) protein	Chr16	+	75687445	75692632	ATGATGATGATGACAGGAGACAAATTGCAGATACAGATGTGCACAGTCCCAGCACAGACCCTACAGATATGGATTTTAGGGTACATTGCTTTGTTAAGTTACATGTTTACATACCTGAAATTCGAAAGCTTGGCCGACAAGGTTAAGACCAAAGCTTACAAGGTGCTGAAGAGCCCATTGGCTCAAACCAAGAGCTCAGAAGAAAGGGAATGGTGGTCATCTTTGAAATTCAAGGGCATTGGTGTCTTATGGAACAGCACGAGGCCTAACAGAGTCACTGGAGGTGGATTTTGGAAAGCTACTGGAACAGACAGATCCATCTACTCCTCAGAAGGAACCAAGTGCATAGGCCTGAAGAAATCCCTGGTCTTCTACAAAGGAAGAGCTGCCAAAGGGATC…	MMMMTGDKLQIQMCTVPAQTLQIWILGYIALLSYMFTYLKFESLADKVKTKAYKVLKSPLAQTKSSEEREWWSSLKFKGIGVLWNSTRPNRVTGGGFWKATGTDRSIYSSEGTKCIGLKKSLVFYKGRAAKGIKTDSMMHEFRLPSITNSNPTKRPIDKNLPTNDSWAICKIFKKTSSMAERALSHTWVSSLSENTNFDPYSHSAHGTQFTSKNSISSTGQAGSALQFSCNSELQQTLTTAFSPLDVLSYKHINPTVCKPPLLPISNMEFPTGLLFPPHEMLAPTKCTVEIASMLQNMSPTIFGDVSKASKNIDFGTQQFNSYDANLQQDTKTNIDNAEGRFLRKNTNDYHENKEWETTRTVGFPFNVPPNPSDEWKSNLPWDSPVSE	388	(NAC) domain-containing protein	GO:0003674,GO:0003700,GO:0005575,GO:0005622,GO:0005623,GO:0005634,GO:0006355,GO:0007275,GO:0008150,GO:0009719,GO:0009725,GO:0009733,GO:0009786,GO:0009889,GO:0009987,GO:0010033,GO:0010468,GO:0010556,GO:0017145,GO:0019219,GO:0019222,GO:0022622,GO:0031323,GO:0031326,GO:0032501,GO:0032502,GO:0042221,GO:0043226,GO:0043227,GO:0043229,GO:0043231,GO:0044424,GO:0044464,GO:0045770,GO:0048103,GO:0048364,GO:…
MsNAC35	evm.model.ctg223.350	evm.TU.ctg223.350	PF02365.20	No apical meristem (NAM) protein	Chr17	-	32996462	33015971	ATGGGCGATCTGTACTCGCTACCTTTTCCACCCGGCTTCCGATTCCAGCCCACCGAAGAAGAGCTCCTCGCCCACTACCTCAGAAACAAGCACCACCAACGCCTCCCTCTTCCCTCTCACCCTCTCCTTCTAAATGCTATCCAAGATCTCGACATTTACAATCATGACCCTGTCAATCTCCCCGAGACCGCCTACTTCCCGTCCGTCGACGAGGAGAAGCGCTGGTTCTTCTTTACGCCGAGGGCGGAGGGAAAGCAAGAGGACGGATTGAAGCGGAAGGCGAAGGGTGGGTACTGGAAGAGAATGGGCGGCGAACGGGCAGTTGTGAGCGTAAAAGAAGGGGCGGTTTTGGGAACAAAGAAGACTTTTGCGTTCTACCGAGGGACGTTTCCTCAGGCG…	MGDLYSLPFPPGFRFQPTEEELLAHYLRNKHHQRLPLPSHPLLLNAIQDLDIYNHDPVNLPETAYFPSVDEEKRWFFFTPRAEGKQEDGLKRKAKGGYWKRMGGERAVVSVKEGAVLGTKKTFAFYRGTFPQACKTDWVMDEYELADSHSALGKESFALCCVFLKGCAGKEKHASNSHAEYIPAAAQNHDIDIPSTQHIGASLYGIGEVVAQEDDMQDELGRFLMAMIDEPDGLLAAHPVDNTVLSMVGILQPDENLVKFSNGLTSDGADDVIDEPIDPAILEGDFIELNDLLSPVPEVDSSG	303	NAC domain-containing protein	GO:0003674,GO:0003700,GO:0005575,GO:0005622,GO:0005623,GO:0005634,GO:0005737,GO:0006355,GO:0008150,GO:0009314,GO:0009416,GO:0009628,GO:0009642,GO:0009644,GO:0009889,GO:0009891,GO:0009893,GO:0009962,GO:0010468,GO:0010556,GO:0010557,GO:0010604,GO:0010628,GO:0019219,GO:0019222,GO:0031323,GO:0031325,GO:0031326,GO:0031328,GO:0043226,GO:0043227,GO:0043229,GO:0043231,GO:0044424,GO:0044464,GO:0045893,GO:…
MsNAC36	evm.model.ctg25.139	evm.TU.ctg25.139	PF02365.20	No apical meristem (NAM) protein	Chr2	-	64716372	64749896	ATGGGTAGAAATGTCATGAAGCAAAGGAGAAGATACAGACCAGTTCCAGGCAACTTCTATAATGGCTTCGAAGGTGACATGTATTTCTACACTCGTAGGAAGTTCATTGGAAAGCGGGTAGAACGCTCTGTAGCTGGCCGTCGTGGATTTTGGAAGAATACTGGCGAGGATGCCAATATAAAATTTTCCAACGACATCGTTGGGATTAAAAAGGCATTTGCCTTTCGTGAGGAGAACGGAAAACATGCGACTGGTTGGCAGATGTATGAGTATAGGCTTAAGAATACGGAGTCATCCGTTAGCGTCGCTGTGTTTGCTTCCCGCGACGCTATCTCTCGAAAGCTGCTAGAGAAAAGCAGCTGCTTTCTCTCTTCCAACCTTTCAAGACCTCATCTTCAT…	MGRNVMKQRRRYRPVPGNFYNGFEGDMYFYTRRKFIGKRVERSVAGRRGFWKNTGEDANIKFSNDIVGIKKAFAFREENGKHATGWQMYEYRLKNTESSVSVAVFASRDAISRKLLEKSSCFLSSNLSRPHLHLRMASSSTPISQSHPFPSEAYFKNPKTRSIFTSVFVGDSSLQDRIFSRGSSALNGRKRAEKLFKTVIVSATTAEKPKKRYPGEAKGFVEEMRFVAMKLHTRDQAKEGEKEPDTQPVAKWEPSIEGYLKFLVDSKVMYETLEQIVEKAACPWYAEFRNTGLERSEKLAKDLGWFKEQGHAIPEPSSPGTSYARYLEDLSEKDPPAFICHFYNVYFAHTAGGRMIGKKVAEKILDKKELEFYKWDGDLSQLLQNVREKLNKVAESWSR…	425	Heme oxygenase	GO:0000003,GO:0003006,GO:0003674,GO:0003824,GO:0004392,GO:0005488,GO:0005575,GO:0005622,GO:0005623,GO:0005737,GO:0006629,GO:0006720,GO:0006721,GO:0006725,GO:0006778,GO:0006787,GO:0006788,GO:0006807,GO:0007154,GO:0007165,GO:0007275,GO:0008150,GO:0008152,GO:0008299,GO:0008610,GO:0009056,GO:0009058,GO:0009314,GO:0009411,GO:0009416,GO:0009507,GO:0009536,GO:0009628,GO:0009648,GO:0009791,GO:0009812,GO:…
MsNAC37	evm.model.ctg25.140	evm.TU.ctg25.140	PF02365.20	No apical meristem (NAM) protein	Chr2	-	64772308	64788001	ATGTCCGATTCTTTCCGGAGGAGACCGTTTAAAGTTCCAGGAAATTTCAAGCATGGCATCGGCAATGAGTTATATTTCTTCACTCCTAGGAAGTACAAGGATGAGGGAAGATCACGGATAAAGCGCTCAGTGAATGGCGGTTTTTGGAAAACAACTAGTACTGATAAACCAATCCATATTAATGGCAATGACCTCATTGGATTTAAGAAGACATTCGCTTTTCATGACGGAAAGCAAGGAAAGGCCACAAAAACTGGTTGGATTATGCACGAGTATAGGCTTCCTCCTACCAGCTCAGTTCTGGATGCACAGAGTTATGTTGGAAATAGTAAACAAAAGATGATTGATGAATTTGTTCTATGTAGAATTTATGAGAGGTGGCCCAGCTCTCATAATTTC…	MSDSFRRRPFKVPGNFKHGIGNELYFFTPRKYKDEGRSRIKRSVNGGFWKTTSTDKPIHINGNDLIGFKKTFAFHDGKQGKATKTGWIMHEYRLPPTSSVLDAQSYVGNSKQKMIDEFVLCRIYERWPSSHNFTDAMIIEEDVTSNTPCSSSEDITTSNIATTELDKETFWLPPLFMDSMLLPDMCNVVEEDSSGDFMNKQPQYPSPHQSDMLLGNEFHDMSTVGDFNEITMDVQDHISTYFDGPIGGSLEFLPIVLE	258	NAC transcription factor	GO:0000003,GO:0003006,GO:0007275,GO:0008150,GO:0009555,GO:0009791,GO:0009908,GO:0022414,GO:0032501,GO:0032502,GO:0048229,GO:0048367,GO:0048437,GO:0048438,GO:0048443,GO:0048466,GO:0048608,GO:0048653,GO:0048731,GO:0048827,GO:0048856,GO:0061458,GO:0090567,GO:0099402
MsNAC38	evm.model.ctg25.143	evm.TU.ctg25.143	PF02365.20	No apical meristem (NAM) protein	Chr2	-	64855949	64861945	ATGTCTTCTTCTTCTTCCGTCCATCAAGGAGAATGTGTGACCGGATTCCGTTCCAAACCCAATGATGCAGAGTTGATAAATTACCTCTTAGACTATATCTACAAACATAAGCGTCTAGACGGCATAATCCATGAAGAAAATATTTATGGTTACCATCCTGATAAACTTGGAAGCATGTTCAAGCATGGAATCGAAGGTAAGATGTATTTCTTCACTCCTACAAGGAAAAAGCAACAGGGAGGACAGAAAATAGATCGCTTAGTAGAAGGTGGTCCCGCATTTTGGAAGAATACTAATAAAGGTGAGGACGTAAAATGTCCCAATGGCATTGTTGGGAATAAAAATCCATTTTCCTTTCGAGAGGGGCAGAAACAAAAGAGCATTGGTTGGATCATGCAA…	MSSSSSVHQGECVTGFRSKPNDAELINYLLDYIYKHKRLDGIIHEENIYGYHPDKLGSMFKHGIEGKMYFFTPTRKKQQGGQKIDRLVEGGPAFWKNTNKGEDVKCPNGIVGNKNPFSFREGQKQKSIGWIMQEYRLKDVRGHAENLNQKKAPSDLLMTSRDLVIDRFKASITYFTLQMDDFALCMIYKESKGSSNHSGAIIDGSNQPDGKFNTYEPYDSDGDWRRHLSGYCE	233	No apical meristem (NAM) protein	-
MsNAC39	evm.model.ctg252.153	evm.TU.ctg252.153	PF02365.20	No apical meristem (NAM) protein	Chr19	-	10242544	10248267	ATGGACATTAGAGTAATTCCATCTCCTCAACTTGCCCAACGATGGGATTTTGGTGAATATGAGCATCGTAACAAAGTCGGCATGACCAGGCACCGTCACCCCACGAGGGAGGGAAATTTCTTCATGGGTGATGATCTAATACAAGGCACAAGAGTCCTATATTATTTATCTACTTCTATTCTCTCCTACTTTCAATCGTCAAATTTCCGTTTCTCTTTCATACTTCAAAACCTTTTCTTGTGTGTTTTGTATCATTTTGAAATGGAGGAGAATCTCCCACCTGGGTTTAGATTCCACCCAACTGATGAAGAGCTCATCACTTATTATCTGACTCGAAAGGTTTCTGATTTTAACTTCGTCGGTCGAGCGATCACAGACGTCGATCTCAATAAGTGCGAA…	MDIRVIPSPQLAQRWDFGEYEHRNKVGMTRHRHPTREGNFFMGDDLIQGTRVLYYLSTSILSYFQSSNFRFSFILQNLFLCVLYHFEMEENLPPGFRFHPTDEELITYYLTRKVSDFNFVGRAITDVDLNKCEPWDLPGKATMGEREWYFFSLRDRKYPTGLRTNRATDAGYWKTTGKDKEIFHSGVIVGMKKTLVFYMGRAPKGEKSNWVMHEYRLHNKLAYRTAKDEWVVCRVFQKSSTGKKPLPLMESSNELGEIDMPDLSTLISPSVSLNAISTATGSSNNHNNNNRSNSNNNHNNNMDINMDVNWGFGGEMTNHSSPTLPSSMLNSNLLSNSSILRALHYNSYQPRESAGVIVDPFSAQGERFRTNLNSNFPASSSTGISSVQQQPFHHASVWR…	401	(NAC) domain-containing protein	GO:0000003,GO:0001763,GO:0003006,GO:0003674,GO:0003700,GO:0006355,GO:0007275,GO:0008150,GO:0009653,GO:0009790,GO:0009791,GO:0009793,GO:0009888,GO:0009889,GO:0009933,GO:0010014,GO:0010016,GO:0010072,GO:0010154,GO:0010223,GO:0010346,GO:0010468,GO:0010556,GO:0019219,GO:0019222,GO:0022414,GO:0022603,GO:0031323,GO:0031326,GO:0032501,GO:0032502,GO:0040034,GO:0048316,GO:0048366,GO:0048367,GO:0048507,GO:…
MsNAC40	evm.model.ctg254.108	evm.TU.ctg254.108	PF02365.20	No apical meristem (NAM) protein	Chr19	-	23602788	23606040	ATGAGCAATCTCCCACCAGGTTATAGATTCTACCCAACAGAAGCAGAGCTGGTGGGATTCTACCTGCGTAACAAGCTAGAGAACAAGAGAGAGGACTTAGACCGTGTTATTCCGGTCGTAAACATCTTCACTCTCGACCCTTGTCAGCTCCCAAGCATTTCAGGTGAGCTGTGTGCCGGAGACATTGAGCAATGGTTTTTCTTCAGCCCAATGCAAGAGAAAGAAGCTCACGGAGGGAGGCCGAACCGAATCACGCCGACAGGCTACTGGAAAGCTACGGGCTCTCCCGGCTACGTCTTCTCTGACAACCGAGTCATTGGCGTGAAGAAAACCATGGTTTTCTATGAAGGAAAAGCCCCCACAGGGAAGAAAACCAAATGGAAGCTGAATGAATATAGA…	MSNLPPGYRFYPTEAELVGFYLRNKLENKREDLDRVIPVVNIFTLDPCQLPSISGELCAGDIEQWFFFSPMQEKEAHGGRPNRITPTGYWKATGSPGYVFSDNRVIGVKKTMVFYEGKAPTGKKTKWKLNEYRALEEESSSNAIPKLRHEYSLCRVYVRSGSLRSFDRRPTVTMTSGTGSNIDLRIGEGASSSNLGVVSHRNPLKVERADSSSSGDHASHSPAEDSVNNDWNTIGNLDNLWDSIYWD	247	NAC domain-containing protein	GO:0003674,GO:0003700,GO:0006355,GO:0008150,GO:0009889,GO:0010468,GO:0010556,GO:0019219,GO:0019222,GO:0031323,GO:0031326,GO:0050789,GO:0050794,GO:0051171,GO:0051252,GO:0060255,GO:0065007,GO:0080090,GO:0140110,GO:1903506,GO:2000112,GO:2001141
MsNAC41	evm.model.ctg254.112	evm.TU.ctg254.112	PF02365.20	No apical meristem (NAM) protein	Chr19	-	23692734	23695056	ATGTGCAATCTGCCACCAGGTTATAGATTCTACCCAACAGAAGAAGAGCTGGTGGGATTCTACCTGCGTAACAAGCTAGAGAACAGGAGAGAGGACTTAGACCGTGTTATTCCTGCCATCTACGTCTTCACCCTCGACCCTTGGCAGCTCCCAAGCATGTCGGGTGAGCTGTGTGTCGGAGATATTGAACAATGGTTTTTCTTCAGCCCAGTGCAAGAGAAGGAAGCCCACGGAGGGAGGCCAAACCGAATCACACCGTCGGGCTACTGGAAAGCAACGGGCTCTCCTGGCTATATCTTCTCCAACAACCGAGTCATTGGCCTAAAGAAAACCATGGTTTTCTATGAAGGAAGAGCCCCCACAGGGAAGAAAACCAAATGGAAGTTGCATGAGTATAAA…	MCNLPPGYRFYPTEEELVGFYLRNKLENRREDLDRVIPAIYVFTLDPWQLPSMSGELCVGDIEQWFFFSPVQEKEAHGGRPNRITPSGYWKATGSPGYIFSNNRVIGLKKTMVFYEGRAPTGKKTKWKLHEYKALEETSSSNAVPKFRHEYSLCRVYVKSENLRSFDRRPTVTMTSKTKPNIDLHIKDRASSSSLGVISHQNPLKVEIADSSSSGDHASHSQAEYSVKDDWKMIGNLDTLWDSSDWE	247	NAC domain-containing protein	GO:0003674,GO:0003700,GO:0006355,GO:0008150,GO:0009889,GO:0010468,GO:0010556,GO:0019219,GO:0019222,GO:0031323,GO:0031326,GO:0050789,GO:0050794,GO:0051171,GO:0051252,GO:0060255,GO:0065007,GO:0080090,GO:0140110,GO:1903506,GO:2000112,GO:2001141
MsNAC42	evm.model.ctg254.116	evm.TU.ctg254.116	PF02365.20	No apical meristem (NAM) protein	Chr19	-	23822842	23824704	ATGCAAGAGAAAGAAGCTCACGGAGGGAGGCCGAACCGAATCACACCGTCTGGCTACTGGAAAGCAACAGGCTCTCCCGGCTCCGTCTTCTCCTCCAACAACCGAGTCATTGGCCTGAAGAAAACCATGGTTTTCTATGAAGGAAGAGCCCCCACAGGGAAGAAAACCAAATGGAAGTTGAATGAGTATAGAGCCCTTGAAGAAGCATCATCTTCAAATGCAGTTCCAAGGCTACGACATGAATATAGCTTATGCCGAGTATACACCAAATCGGGAAGCCCACGATCATTTGATCGACGACCAACGGTCAATACGACAAGTGGGACAACATCCGATATTGATTTACGCATTAGAGAGGGTGCTAGTAGTAGCAATTTAGGTGTAATTTCTCATGAAAAT…	MQEKEAHGGRPNRITPSGYWKATGSPGSVFSSNNRVIGLKKTMVFYEGRAPTGKKTKWKLNEYRALEEASSSNAVPRLRHEYSLCRVYTKSGSPRSFDRRPTVNTTSGTTSDIDLRIREGASSSNLGVISHENPLKVESPDNSSSGNHACHSPAEDCVNDDSKMIGNLDILWDSMDWD	178	NAC domain-containing protein	GO:0003674,GO:0003700,GO:0006355,GO:0008150,GO:0009889,GO:0010468,GO:0010556,GO:0019219,GO:0019222,GO:0031323,GO:0031326,GO:0050789,GO:0050794,GO:0051171,GO:0051252,GO:0060255,GO:0065007,GO:0080090,GO:0140110,GO:1903506,GO:2000112,GO:2001141
MsNAC43	evm.model.ctg254.127	evm.TU.ctg254.127	PF02365.20	No apical meristem (NAM) protein	Chr19	-	24021169	24029804	ATGAGCAATCTCCCACCAGGTTATAGATTCTACCCAACAGAAGCAGAACTGGTGGAATTCTACTTGTGTAAGAAGCTAGAGAAGAGGAGAGAGGACCTGGACCGCGTTATTCCCGTCGTAGACATCTTCACTCTCGACCCTTCACAGCTCCCAAGCATCTCGGGTGAGCTATGCACAGGTGACATTGAGCAATGGTTTTTCTTCAGCCCAATGCAAGAGAAGGAAGCCCATGGGGGGAGACCGAACCGAATCACGCCGTCAGGCTACTGGAAAGCAACGGGCTCTCCCGGCTATGTTTTCTCGTCCAATAACCGAGTCATCGGCTTGAAGAAAACTATGGTTTTCTATGAAGGAAGAGCCCCTACAGGGAAGAAAACCAAATGGAAGTTGAATGAGTAT…	MSNLPPGYRFYPTEAELVEFYLCKKLEKRREDLDRVIPVVDIFTLDPSQLPSISGELCTGDIEQWFFFSPMQEKEAHGGRPNRITPSGYWKATGSPGYVFSSNNRVIGLKKTMVFYEGRAPTGKKTKWKLNEYKALEEASPSNAVPKIRHGYSLCRVYVKSESLRSFDRRPMVNMTSGTTSNIDQSSREGASSSNLGVISHQNPLMVERADSSSSGDHTSHTLAEDSVNDDWKMIGNLDTLWDWMD	246	NAC domain-containing protein	GO:0003674,GO:0003700,GO:0006355,GO:0008150,GO:0009889,GO:0010468,GO:0010556,GO:0019219,GO:0019222,GO:0031323,GO:0031326,GO:0050789,GO:0050794,GO:0051171,GO:0051252,GO:0060255,GO:0065007,GO:0080090,GO:0140110,GO:1903506,GO:2000112,GO:2001141
MsNAC44	evm.model.ctg26.237	evm.TU.ctg26.237	PF02365.20	No apical meristem (NAM) protein	Chr2	-	72822330	72831963	ATGGATAAGAGTCGTATCGGTTCAATTAGCAGTTCTGATCTCATCGACGCAAAGCTTGAACGGCATCAGATGTGTCTAACCGTAAGGTGCCCGGGTTGTGGATACATGCTCGATCGAAAACGGGACTGGTTAGGGCTTCCAGCAGGAGTGAAATTTGATCCAACAGATCAAGAGTTGATAGAGCACCTTGAGGCGAAGGTAGAAGAAGAATCGGGGAACTCGAAATCTCATCCTCTGATAGATGAATTCATCCCTACAATAGAAGGGGAAGATGGAATCTGCTACACCCATCCTGAAAAACTTCCAGGTGTAACAAAGGACGGTCTAATCAGGCATTTCTTCCACAGGCCATCCAAGGCCTACACCACTGGAACAAGGAAAAGGAGGAAAATCCAAACA…	MDKSRIGSISSSDLIDAKLERHQMCLTVRCPGCGYMLDRKRDWLGLPAGVKFDPTDQELIEHLEAKVEEESGNSKSHPLIDEFIPTIEGEDGICYTHPEKLPGVTKDGLIRHFFHRPSKAYTTGTRKRRKIQTECDLQGGETRWHKTGKTRPVMVIGKQKGCKKILVLYTNFGKRRKPEKTNWVMHQYHLGLSDEEKEGELVVSKIFYQTQPRQCNWTDKIAGGESIEHRRETGSESCSSREVTSNRDHDFHVVGIPSYSSMDIQRLKPDHFIFGPVGKSIDEVGQREASNARKASGSMCAEHEELDQQKSLHVTHENPVVTSAYQISRQSNPITTVVSQPLPQTSIVLDDPYQVPAIILQHENFQQQHHQQKLAERSASGLEEIILGCTSGAVKEVGC…	416	(NAC) domain-containing protein	GO:0000075,GO:0000077,GO:0003674,GO:0003676,GO:0003677,GO:0003700,GO:0005488,GO:0006355,GO:0006950,GO:0006974,GO:0008150,GO:0009314,GO:0009628,GO:0009889,GO:0009987,GO:0010212,GO:0010332,GO:0010468,GO:0010556,GO:0010564,GO:0019219,GO:0019222,GO:0031323,GO:0031326,GO:0031570,GO:0033043,GO:0033554,GO:0040020,GO:0043565,GO:0045786,GO:0048519,GO:0048523,GO:0050789,GO:0050794,GO:0050896,GO:0051128,GO:…
MsNAC45	evm.model.ctg27.25	evm.TU.ctg27.25	PF02365.20	No apical meristem (NAM) protein	Chr2	-	80303175	80305885	ATGGAACAGAAGCAGAAGCAGCAGCAGCTGCAGCAACAGCAGCATTATGGGCAGAAGCAACAGCAGCAGCATTATGGTGGTGGTGTTGAATCCAACAACACCAACAACGTAGGAAGAGGAGTAGTAGATGTTCCTGATGAAAGAAAGAAAAACAACATTCCCTTGTCTTTTCCACCTGGCTACAGGTTTCATCCTCACGATGAAGAGCTAATAATTCATTATCTCCAAAAGAAGGTCTCAAATCTTGATTTGCCTTATAACAACATCAACGATGTCAATCTCTACCAATATAATCCTGAAGACCTCATAGAGAAGTATCAATTGTGTGGCGAGAAGTTCTGGTACTTTTTCACTCCTAGGGATCGAAAGTATCGGAATGGGACCCGTCCAAATCGAGCA…	MEQKQKQQQLQQQQHYGQKQQQQHYGGGVESNNTNNVGRGVVDVPDERKKNNIPLSFPPGYRFHPHDEELIIHYLQKKVSNLDLPYNNINDVNLYQYNPEDLIEKYQLCGEKFWYFFTPRDRKYRNGTRPNRAAGDGYWKATGADRPIYNNKKIVGYRKALVFYKGKPTKTSSSKTNWIMHEYRVPEATENLPRIDGSMRLDDWVLCRIHWKPERTERPTKIRRKEDGRTAIIDPTVGCDESDNYLNDIDSVALNCNFNSTEDNITPNSLFGEYNDYALDASFLNDSAYPFEYMNSALDAYNNLYNIDQGAHNWRHAIPRSREQPFTAKPENYDVPSQINLFNRTMMESNHLSNNESVGWVPDGLQNPHTVLRRT	375	NAC domain-containing protein	-
MsNAC46	evm.model.ctg27.296	evm.TU.ctg27.296	PF02365.20	No apical meristem (NAM) protein	Chr2	+	86679970	86689570	ATGAAGATGCAGTTGGGATCTACTTCTGCTGCCTCCGATTCTAACACAGGAGGAGGCGAAATTGTTGTTGCCGGGGGTGGTTCAAAGTCGCCTTGGCCGCCTGGTTTCCGTTTCCATCCAATGGATGAGGAGCTCATATTGTATTATCTGAAGAGGAAAATCTGTCGCCGACGCCTTAAGCTCAACATTATCAGAGAGATTGACGTCTACAAGTGTGAGCCATGGGAGTTGCCTGGAAAATCTCTCCTGCAGACAGGTGATAAGCTGTGGTACTTCTTCAGCCCCAGAGACCGCAAGTACCCCAATGGGGTGAGATCAAATCGGGGGACTAAAAGTGGTTATTGGAAGGCTACAGGAAAGGATAGGAGTATTTCACGGAATTCCAGGAAGGTGGGCATG…	MKMQLGSTSAASDSNTGGGEIVVAGGGSKSPWPPGFRFHPMDEELILYYLKRKICRRRLKLNIIREIDVYKCEPWELPGKSLLQTGDKLWYFFSPRDRKYPNGVRSNRGTKSGYWKATGKDRSISRNSRKVGMKKTLVFYKGRPPKGARTDWVMHEYTMVKEELESCNAVQDSYALYKVYQKSGPGPKNGEQYGAPFREEEWLDDDDPIDDSLGILASAEYPASDLIGGYDQFPPPTDDVEDTVQQTVNEPEVDQQHFNSFVRELEVADKEGTQSYVVESSLREAISIEPSEISRPCDWADCGQTSSQVTCSATSIMQPSEALEVTCASDDGDFVELNDLADQVPGVSSWSISNDFPFHDTGGFYASDYYFDAPMFLPEEIVPLEGTTQPHLECYATDI…	580	(NAC) domain-containing protein	-
MsNAC47	evm.model.ctg31.58	evm.TU.ctg31.58	PF02365.20	No apical meristem (NAM) protein	Chr3	+	8506705	8510204	ATGGGTGGGATGTCATTGCCGCCTGGTTTTCGATTCCACCCAACTGATGAGGAGTTGGTGGGGTATTACTTAAAGAGGAAAGTAGATGGACTGAAGATAGAGCTTGAAGTTATTCCGGTAGTCGATTTATATAAGTTCGACCCATGGGAGTTACCAGATAAATCATTCCTTCCCAAAAGAGATATGGAGTGGTTTTTTTTCTGTCCCCGTGATAGAAAGTATCCAAACGGTTCACGTACAAATAGGGCTACTCAAGCAGGCTACTGGAAAGCCACTGGGAAAGATCGAAAAATAGTCTGCCATCCTGCTGCGATCGGGTTTAGGAAGACCCTTGTTTTCTACTGTGGAAGAGCTCCTTCAGGAAACCGGACTGATTGGGTGATGCATGAATATCGTCTC…	MGGMSLPPGFRFHPTDEELVGYYLKRKVDGLKIELEVIPVVDLYKFDPWELPDKSFLPKRDMEWFFFCPRDRKYPNGSRTNRATQAGYWKATGKDRKIVCHPAAIGFRKTLVFYCGRAPSGNRTDWVMHEYRLGADPSQGSSGHQGTFTLCRVIKRNDLGQRTIYLQGESKSKRSISSSMDDLTPRFSTDVLRTSEERASQARTMLNGSNDSTLISSSSEVSSGIELQPTMTEIDQTSPLFSRYLASDTLKESECLPLIESPNSVTEWKPSNPILSPFSTYFIEEVDLAEELNRNSCMSPSPRPINCSETCINKDSMFQCLEWTEPLGHGFQAWNLNRADGSFGELTNLWLQDDNVAIVM	360	NAC domain-containing protein	GO:0003674,GO:0003676,GO:0003677,GO:0003700,GO:0005488,GO:0005575,GO:0005622,GO:0005623,GO:0005634,GO:0006355,GO:0008150,GO:0008283,GO:0009719,GO:0009725,GO:0009733,GO:0009787,GO:0009789,GO:0009889,GO:0009966,GO:0009967,GO:0009987,GO:0010033,GO:0010468,GO:0010556,GO:0010646,GO:0010647,GO:0019219,GO:0019222,GO:0023051,GO:0023056,GO:0031323,GO:0031326,GO:0032870,GO:0042221,GO:0043226,GO:0043227,GO:…
MsNAC48	evm.model.ctg3.239	evm.TU.ctg3.239	PF02365.20	No apical meristem (NAM) protein	Chr1	-	13378436	13386453	ATGAATACTTTTACACATGTTCCCCCGGGTTTTCGGTTCCATCCCACAGATGAAGAACTTGTTGATTATTACCTTAGAAAGAAGGTTGCATCAAGAAGAATTGACCTCGATGTCATCAAGGATATTGATCTTTACAAAATTGAGCCATGGGATCTTCAGGAAAAATGTAAGATAGGAACTGAAGAGCAGAATGAATGGTATTTCTTTAGCCATAAAGATAAGAAGTATCCGACAGGAACCCGCACTAATAGAGCGACAACAGCAGGGTTTTGGAAAGCAACAGGAAGAGACAAGGCCATTTACTCTAAGCATAACTTGATTGGGATGAGGAAGACCTTAGTCTTTTATAAAGGTCGAGCCCCGAATGGGCAAAAGTCAGATTGGATAATGCACGAGTAC…	MNTFTHVPPGFRFHPTDEELVDYYLRKKVASRRIDLDVIKDIDLYKIEPWDLQEKCKIGTEEQNEWYFFSHKDKKYPTGTRTNRATTAGFWKATGRDKAIYSKHNLIGMRKTLVFYKGRAPNGQKSDWIMHEYRLETNENATPQEEGWVVCRVFKKRITAIRKVSEHESPCWYDEQVSFMPELDSPKRIAPDMGYHNPYSCKQELELHYHMPHDPFLQLPQLESPKLPNSATTISCNSVVAYGLDINQGSTLQSSSLTQEEQMHQNHQHQMNSVYNHNAEQAVDQVTDWRVLDKFVASQLSQEDVSKEPNYSNPENVFNVSDHMNLLIRQSNKAEAAADYASTSTSSCQIDLWK	354	(NAC) domain-containing protein	-
MsNAC49	evm.model.ctg33.522	evm.TU.ctg33.522	PF02365.20	No apical meristem (NAM) protein	Chr3	-	34028386	34030525	ATGGATGACATGAGTCTGTCGGTGGTAAACGGCCAGTCCCGAGTCCCACCAGGCTTCCGTTTCCATCCGACAGAGGAGGAACTCTTGCACTATTACTTGAGGAAGAAGGTGGCGTATGAGAAGATCGACTTGGATGTCATCCGGGATGTCGATCTCAATAAGCTCGAGCCTTGGGATATACAAGAGAAGTGCAAAATCGGATCTGCTCCACAGAATGACTGGTACTTTTTCAGCCACAAAGACAAGAAGTACCCAACAGGCACAAGGACGAATCGGGCAACGGCTGCCGGATTCTGGAAAGCTACTGGCCGTGATAAGGTCATCTACAGTAGCTTCAAACGGATTGGAATGAGAAAGACTCTAGTTTTCTATAAGGGGAGAGCACCTCATGGTCAAAAA…	MDDMSLSVVNGQSRVPPGFRFHPTEEELLHYYLRKKVAYEKIDLDVIRDVDLNKLEPWDIQEKCKIGSAPQNDWYFFSHKDKKYPTGTRTNRATAAGFWKATGRDKVIYSSFKRIGMRKTLVFYKGRAPHGQKSDWIMHEYRLDDHSDTMSISNASSSSGEMGQEEGWVVCRVFKKKNHHKTLDSPNNSSITSDTHTQMLHSSRDGALDQILQYMGRTCKQEPEPNINKNNFNINNHSKSNNSTRYLRPIEMAMGNGVHERFMQLPPLESPTLPALPNDCPRFNYNCSSQTFYTPIDVHEISAAATADGEASITNQGPVNSNPVYQAKPDFSDWATLDRLIASHLNGQVDTSKQLCFNNPNLTFCSISEQGLPSPPHVPSSNRSFGTTQDYNNDDDDDA…	415	NAC domain-containing protein	GO:0000003,GO:0003674,GO:0003676,GO:0003677,GO:0003700,GO:0005488,GO:0005575,GO:0005622,GO:0005623,GO:0005634,GO:0006355,GO:0008150,GO:0009832,GO:0009834,GO:0009889,GO:0009891,GO:0009893,GO:0009900,GO:0009987,GO:0010047,GO:0010468,GO:0010556,GO:0010557,GO:0010604,GO:0010628,GO:0016020,GO:0019219,GO:0019222,GO:0022414,GO:0031323,GO:0031325,GO:0031326,GO:0031328,GO:0032501,GO:0032504,GO:0042546,GO:…
MsNAC50	evm.model.ctg33.754_evm.model.ctg33.755	evm.TU.ctg33.754_evm.TU.ctg33.755	PF02365.20	No apical meristem (NAM) protein	Chr3	-	45482248	45489144	ATGGAGTGTTCGGCTCTGCCCTTGGGATTCAGATTCCGTCCGACGGACGAAGAGCTCATTAACCACTACTTGAAGGGCAAGATCAATGGACGTACATCCTTCGAGAATGTGATGAGGGAAATCGACGTGTGCAAGTGCGAGCCATGGGATTTACCAAGTAAATCGGTGATTATATCTGATGATCCGGAGTGGTTTTTCTTTTCCCCCCGCGATCGTAAGTATCCTAATGGGCACCGGTCAAACCGGGCCACCGAAGCTGGGTATTGGAAAGCAACGGGTAAGGATCGGAATATCAAGTCGGGGTCGAAACGGATCGGGATGAAGAAGACACTGGTTTTCTATAGAGGGCGTGCTCCGAATGGTGAGAGGACGAATTATATAATGCACGAGTACCGGGTA…	MECSALPLGFRFRPTDEELINHYLKGKINGRTSFENVMREIDVCKCEPWDLPSKSVIISDDPEWFFFSPRDRKYPNGHRSNRATEAGYWKATGKDRNIKSGSKRIGMKKTLVFYRGRAPNGERTNYIMHEYRVTGNEGDVGQGAFVICRLFRKPEENGTSTFDEVDPSGFSPTTTKSSPDDTQHAGDSVEQSATPSNQGLPESDMREDPQPSVETVVETVNIKRWLADKADNGTAFPPASEGSQCNSTMASDVGDREEVEALLENFYEPTFEPLYPSYIDPQMHIGLGPYVDPPYYDIFGNGPPAGLFQDNTAEQDASSVDLVSELFETVINANHGEHSSEGQTSAGFGINPSGGFQAQGPMLQCEAHGATLQSVEPWELSSMISASSSEADAELSRSP…	680	No apical meristem (NAM) protein	GO:0001067,GO:0002831,GO:0002833,GO:0003674,GO:0003676,GO:0003677,GO:0003700,GO:0005488,GO:0005515,GO:0005516,GO:0005575,GO:0005622,GO:0005623,GO:0005634,GO:0005737,GO:0005783,GO:0005789,GO:0005886,GO:0006355,GO:0006950,GO:0006970,GO:0008150,GO:0009314,GO:0009416,GO:0009628,GO:0009642,GO:0009644,GO:0009889,GO:0009890,GO:0009891,GO:0009892,GO:0009893,GO:0009962,GO:0009987,GO:0010468,GO:0010556,GO:…
MsNAC51	evm.model.ctg33.84	evm.TU.ctg33.84	PF02365.20	No apical meristem (NAM) protein	Chr3	-	15188115	15188712	ATGAATACCTTTTCACAAGTTCCCCCAGGTTTTCGGTTCCATCCGACTGATGAGGAACTCGTCGATTACTATCTTAGAAAGAAAATTGCTTCTAGAAGGATTGATCTAGATGTAATCAAAGACATTGATCTATACAAAATTGAGCCATGGGATCTTCAAGAAAAATGTAAGATAGGTACAGAAGAGCAGAATGAATGGTATTTCTTCAGCCACAAAGATAAGAAGTATCCAACAGGAACTCGTACAAATAGAGCCACAACAGCAGGGTTTTGGAAGGCAACGGGAAGAGATAAGGCCATATATTCGAAGCATAACTTGATTGGCATGAGGAAGACCTTAGTCTTTTACAAGGGTCGGGCCCCAAATGGGCAAAAATCGGATTGGATAATGCACGAGTAT…	MNTFSQVPPGFRFHPTDEELVDYYLRKKIASRRIDLDVIKDIDLYKIEPWDLQEKCKIGTEEQNEWYFFSHKDKKYPTGTRTNRATTAGFWKATGRDKAIYSKHNLIGMRKTLVFYKGRAPNGQKSDWIMHEYRLETNENGTTQASILIGILFY	154	(NAC) domain-containing protein	GO:0001101,GO:0003674,GO:0003676,GO:0003677,GO:0003700,GO:0005488,GO:0005515,GO:0005575,GO:0005618,GO:0005622,GO:0005623,GO:0005634,GO:0005975,GO:0005976,GO:0006355,GO:0008150,GO:0008152,GO:0009505,GO:0009531,GO:0009605,GO:0009607,GO:0009620,GO:0009719,GO:0009725,GO:0009733,GO:0009735,GO:0009737,GO:0009741,GO:0009888,GO:0009889,GO:0009891,GO:0009893,GO:0009987,GO:0010033,GO:0010087,GO:0010089,GO:…
MsNAC52	evm.model.ctg35.379	evm.TU.ctg35.379	PF02365.20	No apical meristem (NAM) protein	Chr3	-	103570657	103574175	ATGCATGAGACCTGGGAGTCAATATCATCCGAACTGGAGTCCATATTATCCGAACTGCAATTACTGGAGAACCTCGAGAAAAAGAATCGTGGCCTTGATAATCCATCCGATGTGATTGCTGAATATGATATCTATAAATGCCGCCCAGAACTACTTCCACGCGGTGGCTGGCTTGGGAAATTAGAGGAGTTGTTTTACTATGTGGAACGAAAGTTGAACGAATTTAGAATAAATCGCTCTGTGGAAAATGGTTATGGTTGTTGGAAGTCAACTGGAGAAGTGGTAGCAATAAAACACAAAGATCTAGTCATCGGGTATAAGCATACATTTAATTTTAGGATTGGGAAAAATAGAAGAGAAACAGATTGGATGATGGAGGAGTATAGGCTTGCTTCTCAA…	MHETWESISSELESILSELQLLENLEKKNRGLDNPSDVIAEYDIYKCRPELLPRGGWLGKLEELFYYVERKLNEFRINRSVENGYGCWKSTGEVVAIKHKDLVIGYKHTFNFRIGKNRRETDWMMEEYRLASQTSSMDLKRLVEGGKCTKATEFFLCKIYERSSEETLTRSKRTKTSEMNGSWDISAEDL	190	No apical meristem (NAM) protein	-
MsNAC53	evm.model.ctg3.57	evm.TU.ctg3.57	PF02365.20	No apical meristem (NAM) protein	Chr1	+	8725438	8729031	ATGAGTGAGACAATGGGTGGGATGTATTTGCCACCTGGTTTCCGGTTCCACCCAACTGACGAGGAGTTGGTGAGTTACTATTTAAAGAGGAAAGTAGATGGACTGAAGATCGAGCTCGAAGTTATTCCAGAGATCGAGTTATACAAGTTCAACCCATGGGATTTACCTGACAAGTCATTCCTTCCGAAAAGGGACATGGAATGGTTCTTTTTCTGCCCCCGTGATAGGAAGTATCCGAATGGCTCACGTACAAACAGAGCTACAGCTGCAGGCTACTGGAAAGCCACCGGGAAAGACCGACAAGTAGTTTGTAATTCCTCTGTGATCGGGTTGAGGAAGACCCTGGTTTTCTATTGTGGAAGAGCTCCTTTAGGAGATCGGACCGATTGGGTGATGCAT…	MSETMGGMYLPPGFRFHPTDEELVSYYLKRKVDGLKIELEVIPEIELYKFNPWDLPDKSFLPKRDMEWFFFCPRDRKYPNGSRTNRATAAGYWKATGKDRQVVCNSSVIGLRKTLVFYCGRAPLGDRTDWVMHEYRLCGDSSQGSSNFQGAFVLCRVVKKNEHGQKIGDIYGESKSKKAISSSMNDFNQGNFSNKISRTSGESPSPESNPFIKSNNSTPVTSPAEIRRGVEPEPMVIEIDDDPNLLASNDQVSDISKVYGFECLFPNNISNSVTTLQPCNLMASPSPSYFMEEVNLADDLSRMGFMPPYTRPTTSLGMDEDAMFQSFEWPGYPGNMNPLSDGCEAWNTMVSPSICRQTSGDGSFGELTDLWQQDDNLVVVM	381	NAC domain-containing protein	GO:0003674,GO:0003676,GO:0003677,GO:0003700,GO:0005488,GO:0005575,GO:0005622,GO:0005623,GO:0005634,GO:0006355,GO:0008150,GO:0008283,GO:0009719,GO:0009725,GO:0009733,GO:0009787,GO:0009789,GO:0009889,GO:0009966,GO:0009967,GO:0009987,GO:0010033,GO:0010468,GO:0010556,GO:0010646,GO:0010647,GO:0019219,GO:0019222,GO:0023051,GO:0023056,GO:0031323,GO:0031326,GO:0032870,GO:0042221,GO:0043226,GO:0043227,GO:…
MsNAC54	evm.model.ctg37.217	evm.TU.ctg37.217	PF02365.20	No apical meristem (NAM) protein	Chr4	-	5939090	5942921	ATGTTTGGGATGGGAGAGATAGGGTGGGAGGAGAGTAATGAACAAGGGCTGCCTCCTGGCTTTAGATTTCACCCAACTGATGAAGAGCTTATCACCTTTTATTTGGCTTCCAAGGTCTTTAATGCCTCCTTCTCTGGTGTTGAAATTGCTGAGGTTGATCTCAATAAGTGTGAGCCTTGGGAGCTTCCAGATATAGCGAAGATGGGGGAGAGAGAGTGGTATTTCTTCAGTCTCAGAGACCGAAAATACCCAACCGGCCTACGCACGAATAGAGCAACTGAAGCCGGGTATTGGAAAGCTACTGGAAAAGATAGAGAGGTGTACAGCACTTCTACTGGCGTCCTTCTCGGCATGAAGAAAACCCTCGTTTTCTACAAGGGAAGAGCTCCTCGTGGAGGA…	MFGMGEIGWEESNEQGLPPGFRFHPTDEELITFYLASKVFNASFSGVEIAEVDLNKCEPWELPDIAKMGEREWYFFSLRDRKYPTGLRTNRATEAGYWKATGKDREVYSTSTGVLLGMKKTLVFYKGRAPRGGGEKHPFLPNNSFLLEASSPSYPNPSLSLPPFLLESQTLESPIQALQNPFANHQDNDMKALNPIHLFPMTFQPSFPSNPSHKSLPHECPTVLKQCKMENSISSFYPQEANFNSWVDRNLPQTLYNHRIFDMGFGVFGLSPPAAAVQDLSTPATLSRPGFQMLDPPPITGLGESGPLDH	310	Protein CUP-SHAPED COTYLEDON	GO:0003674,GO:0003700,GO:0006355,GO:0008150,GO:0009653,GO:0009888,GO:0009889,GO:0009933,GO:0010014,GO:0010199,GO:0010468,GO:0010556,GO:0019219,GO:0019222,GO:0031323,GO:0031326,GO:0032502,GO:0048507,GO:0048532,GO:0048646,GO:0048856,GO:0048859,GO:0050789,GO:0050794,GO:0051171,GO:0051252,GO:0060255,GO:0065007,GO:0080090,GO:0090691,GO:0140110,GO:1903506,GO:2000112,GO:2001141
MsNAC55	evm.model.ctg38.123	evm.TU.ctg38.123	PF02365.20	No apical meristem (NAM) protein	Chr4	+	19896447	19906593	ATGAATAAGAGCAATATAGGTTCAATTAGCAGTTCTGATCTCATCGACGCAAAGCTAGAAGAGCATCAGATGTGTGGATCCAAGCAGTGCCCGGGATGTGGACACAAGCTCGAACGGAGACCGGATTGGTTAGGGCTTCCAGCAGGAGTGAAATTTGATCCAACAGACCAGGAACTGATAGAACATCTAGAAGCGAAGGTTGAATCTGAGCAGTCGAAATCTCACCCTCTGATTGATGAATTCATCCCTACCATCGAAGGAGAAGATGGGATTTGCTACACTCATCCGGAGAAACTTCCAGGTGTCACAAAAGATGGTCTGAGCAGGCACTTCTTCCACAGGCCATCAAAAGCCTACACCACAGGAACAAGGAAGAGAAGGAAAATACAAACAGAATGT…	MNKSNIGSISSSDLIDAKLEEHQMCGSKQCPGCGHKLERRPDWLGLPAGVKFDPTDQELIEHLEAKVESEQSKSHPLIDEFIPTIEGEDGICYTHPEKLPGVTKDGLSRHFFHRPSKAYTTGTRKRRKIQTECDLQGGETRWHKTGKTRPVMVNGKKKGCKKILVLYTNFGKHRKPEKTNWVMHQYHLGQSEEEKEGELVVSKIFYQTQPRQCNWSDKSGPGEGSDHRRESGSGVSSSKDVISPLDELGGTGHGISGYSTMDIQQMKSDNFSFAPFRKSFDEVGMGDASKAREASSRTCEEHEEHEHQRHHMTHEQPHQPVATAAFHVSRPSNPISTIISPPLHQTSIVLADPYHRILLQDDKFQQQQQQHQKLAERSGSSGLEELIMGCTSAAGMKED…	426	(NAC) domain-containing protein	GO:0000075,GO:0000077,GO:0003674,GO:0003676,GO:0003677,GO:0003700,GO:0005488,GO:0006355,GO:0006950,GO:0006974,GO:0008150,GO:0009314,GO:0009628,GO:0009889,GO:0009987,GO:0010212,GO:0010332,GO:0010468,GO:0010556,GO:0010564,GO:0019219,GO:0019222,GO:0031323,GO:0031326,GO:0031570,GO:0033043,GO:0033554,GO:0040020,GO:0043565,GO:0045786,GO:0048519,GO:0048523,GO:0050789,GO:0050794,GO:0050896,GO:0051128,GO:…
MsNAC56	evm.model.ctg41.31	evm.TU.ctg41.31	PF02365.20	No apical meristem (NAM) protein	Chr4	+	27667083	27675031	ATGGCTAAAATTAACCCCCAAAACTTTCCTGTAGGCGTTCGTTTCACGCCTCCCGATCGGGTATTACTGCTGGTTTATCTCAAGAACAAGAATCATGGGCTTCCACAGCCAATCGATTTGATCGATGAATATAATATCTATACATGTCGCCCAGATCGATTTCCACGAAATTTCTGCTATGGGAAGGGGAACGAGTTGTACTTCTTTGTCACAAGAGATTTGACAAAACCTAGGATGAAGCGCACTGTGGAAAATGGTTATGGTTTTTGGAGGTCAACTGGAAATATTGCAGAAGTAAGAGACCAAGATGTAGTCATTGGGGAAAAGAGGACGTTTAATTTTTTCATTGTACGTAAACCAAAACCGATAAAAACAAATTGGGTCATGAAGGAATACAAT…	MAKINPQNFPVGVRFTPPDRVLLLVYLKNKNHGLPQPIDLIDEYNIYTCRPDRFPRNFCYGKGNELYFFVTRDLTKPRMKRTVENGYGFWRSTGNIAEVRDQDVVIGEKRTFNFFIVRKPKPIKTNWVMKEYNLACESSLIDPKSSEGAEMKKVGFVLCKIYENKKASDENQREEEQMTEMSIGDGPNNSDISDAGMENLEDSTSLPFDENPINADFPSLGCDINMEDPFLPSEENQMTGMSLGDGPNITGSTPLWGNMSTEAFEASQYLAFKENQMTDMPLGDGLDVADFPQGDTSMDDIFLALDKNQMTRMPLGNGPNNPELFWWDAEAALEPIAFEENQMTEMSLRDGPNSSDG	357	#N/A	#N/A
MsNAC57	evm.model.ctg41.32	evm.TU.ctg41.32	PF02365.20	No apical meristem (NAM) protein	Chr4	+	27702452	27708285	ATGAGAAAATTCCAGTATGGGAAGGAGAACGAGTTGTATTTCTTTGTCCCAAGAAATTTGGAGAAATTACGGATGAACCGCATTGTGAAACAAGATTATGGTTTTTGGAGGTCAACTGGAAATACTATAGAAAAATGCGTAGGTAAAGTCACCTTGCAAAGGGGAACGTTGGATTTTTACATTAAAAATGCTGAAGGAAATTATGAAAAAACAGATTGGAAGATGAACGAGTACAGTCTTGCTTCCAAAAGTTCAATGGATCAAACAAGCTCTAGTAAGGGTGCTAAAAGGAAGAAGGGCCGCTTTGCTCTGTGTAAGATTTATGGGCACAAAACCCAGGTGGTGGAAAACCCAATGGGAGGAATGCAGGTGGGAGATGGAGATGCTTCTAATGGCCCT…	MRKFQYGKENELYFFVPRNLEKLRMNRIVKQDYGFWRSTGNTIEKCVGKVTLQRGTLDFYIKNAEGNYEKTDWKMNEYSLASKSSMDQTSSSKGAKRKKGRFALCKIYGHKTQVVENPMGGMQVGDGDASNGPDSGPPSWVIEDMEAWVASYLSA	155	#N/A	#N/A
MsNAC58	evm.model.ctg43.315	evm.TU.ctg43.315	PF02365.20	No apical meristem (NAM) protein	Chr4	+	50999712	51032721	ATGCCGAGCAGTAACTCAGCACACAGAGGATTGCTTAGGGATCTTGATATGGAGAACTTCCCTGGGTTTAGATTTCATCCGACGGACGAGGAGCTTGTATCCTACTACTTGAAGAAGAAGATCGACGGTCAGGAGAAGAGCGTGGAGGTGATCTCCGAGGTGGACATCTATAAATTCGAGCCTTGGGATTTGCCTGCCAAATCCATTATTCAGACAGTGGACCATCAGTGGTTCTTCTTTACTCCTCGTGGCAAGAAATACCCGAAGGGCTCAAAAACTAACAGGGCTACAGAAGCTGGTTATTGGAAAGCAACTGGAAAAGAGCGAGCCATAAAATCAGGTTCCAGTTTAATCGGTATGAAGAGGACTCTAGTGTTCCATAAAGGCCGTGCTCCAAAA…	MPSSNSAHRGLLRDLDMENFPGFRFHPTDEELVSYYLKKKIDGQEKSVEVISEVDIYKFEPWDLPAKSIIQTVDHQWFFFTPRGKKYPKGSKTNRATEAGYWKATGKERAIKSGSSLIGMKRTLVFHKGRAPKGQRTDWVMHEYCVKGNELDGPKDAFVLCRLWNKQENSGPDHELVNESSLLSPDTGATHPAAAQSGDNRQHSQMKVHEDQKGMKCSLRKPSNGLDFASVEWAVDKAESVQAEPNKRYSTQLGSKISDQDRETGHVEECFADIMEDDIVNLKDFSYTMEDDIFSQDEFSKCGNSIPSPVVDEKTGIERKIRQPTHMSMPRVLPYQGTANRRIRLETKHLKHRHTKMAGVGNDISIGVVIQQDSALLGQGLKRKLLWMVDSPRSMFRVL…	427	NAC domain-containing protein	GO:0000003,GO:0001101,GO:0002376,GO:0003006,GO:0003674,GO:0003676,GO:0003677,GO:0003700,GO:0005488,GO:0005575,GO:0005622,GO:0005623,GO:0005634,GO:0005737,GO:0005783,GO:0005886,GO:0006355,GO:0006508,GO:0006807,GO:0006950,GO:0006952,GO:0006955,GO:0006970,GO:0007275,GO:0008150,GO:0008152,GO:0008219,GO:0009314,GO:0009416,GO:0009626,GO:0009628,GO:0009648,GO:0009651,GO:0009719,GO:0009725,GO:0009739,GO:…
MsNAC59	evm.model.ctg43.511	evm.TU.ctg43.511	PF02365.20	No apical meristem (NAM) protein	Chr4	+	63658369	63664593	ATGGGCTATAAGTTGTCACTGGTCCAGGTTCAGTATACACTCACGGCGCATGCGATGAGTGGTCTGGTAAGAGATTACACAAAGCCACAGGGGCAGCAACCTGATTTTTCAGATCCTGTAGTACTTTCCACGGTACATTGGATCAGTTTTACAGACATTGCTGCTCCTCATCAAACAACTTCCACCAAAGAGGTTAGCTCTATGGGAGAAAAGGAGTGGTGCTTCTTTTGTTTAAGAGGGAGAAAATACAAGAATAGCGTGAGGCCCAATAGGGTAACAGGGTCTGGTTTCTGGAAAGCAACAGGCATTGATAAGCCAATTTATGGTGCTGGCGAAAAAGCTAACGAATGCGTTGGCCTCAAGAAATCTCTTGTTTACTACAGGGGGAGTGCAGGAAAG…	MGYKLSLVQVQYTLTAHAMSGLVRDYTKPQGQQPDFSDPVVLSTVHWISFTDIAAPHQTTSTKEVSSMGEKEWCFFCLRGRKYKNSVRPNRVTGSGFWKATGIDKPIYGAGEKANECVGLKKSLVYYRGSAGKGTKTDWMMHEFRLPISTKNTNHLTAKNTQEAEIWTICRIFKRTISYRKYTPDCNHALSIKQTSAITCSKTCRFESNDTDLYPYF	217	Transcription factor JUNGBRUNNEN 1-like	GO:0003674,GO:0003700,GO:0005975,GO:0005984,GO:0005991,GO:0005992,GO:0006082,GO:0006355,GO:0006520,GO:0006560,GO:0006561,GO:0006725,GO:0006790,GO:0006807,GO:0006950,GO:0006970,GO:0006972,GO:0007275,GO:0007568,GO:0008150,GO:0008152,GO:0008652,GO:0009058,GO:0009064,GO:0009084,GO:0009311,GO:0009312,GO:0009403,GO:0009404,GO:0009628,GO:0009651,GO:0009700,GO:0009718,GO:0009812,GO:0009813,GO:0009889,GO:…
MsNAC60	evm.model.ctg44.85	evm.TU.ctg44.85	PF02365.20	No apical meristem (NAM) protein	Chr4	+	80311977	80326220	ATGCCAAGGGAAGCTCCCCCTCTCTTCGTCAGCAGTCTCCTCTCTCGGAGGATCTTCCTGCCTCCTTTGGGGGACCTGTTCTGTAATAGGTCCTGGCTCAAAAATCTCCTGAAGCTCAGGAGGAACCGCTTCCACCACCTCCATGCCCTCCTCCGGGACCTCTATAACTATTGGGCGAGGAGGGGCGACCTTCCCCTGACCCTTAGAGGATATCTTCTGTTTCTTGACACCCGAGGATCTCCCCGAGGATTCCGATTCCATCCGACGGATGAAGAGCTTGTTGGATTCTATCTCCGGAGGAAGGTGGAGAGGAAATCACTTGGCATTGAGCTCATTAAACAAATAGATATCTATAAATATGACCCATGGGATCTTCCAAAGGTTAGCTCTATGAGAGAA…	MPREAPPLFVSSLLSRRIFLPPLGDLFCNRSWLKNLLKLRRNRFHHLHALLRDLYNYWARRGDLPLTLRGYLLFLDTRGSPRGFRFHPTDEELVGFYLRRKVERKSLGIELIKQIDIYKYDPWDLPKVSSMREKEWYFFCLRGRKYKNSVRPNRVTGSGFWKATGIDKPIYGAGEKANECIGLKKSLVYYRGSAGKGTKTDWMMHEFRLPIITTNTNHLTAKNTQEAEIWTICRIFKRTISYRKYTPDCNHALSIKQTSAIMCSKTCRFESDDTDIYPYFGTSSTIQQIEKKPVINHIDENNLFYSDHLSPVVQPPFSTLCPTFPNSNAIEFFKDGNWDELGDIMKFAVDPALMYGYSMARYISSICNGLSNTMKHDTQWPTQINHTWEDNLIHLHDPT…	445	Transcription factor JUNGBRUNNEN 1-like	GO:0003674,GO:0003700,GO:0005975,GO:0005984,GO:0005991,GO:0005992,GO:0006082,GO:0006355,GO:0006520,GO:0006560,GO:0006561,GO:0006725,GO:0006790,GO:0006807,GO:0006950,GO:0006970,GO:0006972,GO:0007275,GO:0007568,GO:0008150,GO:0008152,GO:0008652,GO:0009058,GO:0009064,GO:0009084,GO:0009311,GO:0009312,GO:0009403,GO:0009404,GO:0009628,GO:0009651,GO:0009700,GO:0009718,GO:0009812,GO:0009813,GO:0009889,GO:…
MsNAC61	evm.model.ctg45.480	evm.TU.ctg45.480	PF02365.20	No apical meristem (NAM) protein	Chr4	+	113199646	113206323	ATGAGCTTCCTAAGCGCAATGGAGGCTAAATTGCCTCCAGGCTTCAGGTTCCACCCAAGAGACGAAGAACTGGTATGCGACTACTTAGCCAAGAAGGTGGCAGGCAACAACACTTGGAGTCTATATGAATATCCCATGATGGTCGAAGTCGACCTAAACAAGATCGAGCCCTGGGACCTCCCTGAAATGGCATGTGTGGGAGGCAAGGAATGGTATTTTTTCAGCCTCCGTGACCGGAAATACGCCACTGGCCTGCGCACAAACCGTGCGACATTATCGGGGTACTGGAAGGCGACCGGGAAGGATAGACGTGTGATCGACGTCCGCAAAGGGAACCTTGTGGGGATGAGGAAAACCCTCGTTTTCTACCAAGGGAGAGCTCCCAAAGGACGGAAAACC…	MSFLSAMEAKLPPGFRFHPRDEELVCDYLAKKVAGNNTWSLYEYPMMVEVDLNKIEPWDLPEMACVGGKEWYFFSLRDRKYATGLRTNRATLSGYWKATGKDRRVIDVRKGNLVGMRKTLVFYQGRAPKGRKTDWVMHEFRLEGPSDPPKISSKEDWVLCRVFYKNRGMSAKLCYEENSYDDTGSSLPPLMDPCLTFDQTPLNLEAFEQVPCFSNLSQDQTSQHTSDPNFQDLPQVDTTIPTKSLVQSEVFPDVGPFLDPLYCDKELVIKAVLDHLDKVDSSRKMTEVVSPSLGEGSSESYFSDMGFESMWNHNMF	316	NAC domain-containing protein 21	GO:0000003,GO:0003006,GO:0003674,GO:0003700,GO:0005575,GO:0005622,GO:0005623,GO:0005634,GO:0006355,GO:0007154,GO:0007165,GO:0007275,GO:0008150,GO:0009653,GO:0009719,GO:0009725,GO:0009733,GO:0009734,GO:0009755,GO:0009790,GO:0009791,GO:0009793,GO:0009888,GO:0009889,GO:0009933,GO:0009987,GO:0010014,GO:0010016,GO:0010033,GO:0010072,GO:0010154,GO:0010468,GO:0010556,GO:0019219,GO:0019222,GO:0022414,GO:…
MsNAC62	evm.model.ctg50.580	evm.TU.ctg50.580	PF02365.20	No apical meristem (NAM) protein	Chr4	-	149897041	149899636	ATGGAGAGCACAGATTCGTCATCAGGCTCGCAGCAGCCTCAGCTCCCACCCGGCTTCCGTTTCCACCCAACCGACGAAGAGCTCGTCGTCCACTACCTGAAGAAGAAGGCGGCTTCCGCTCCACTTCCTGTCACCATCATCGCCGAAGTCGATCTCTACAAGTTTGATCCTTGGGAACTTCCAGATAAAGCGACTTTCGGAGAACAGGAGTGGTATTTTTTCAGCCCTCGAGACAGGAAATACCCAAACGGAGTGAGACCGAATCGAGCTGCTACGTCTGGATATTGGAAGGCAACCGGAACAGATAAACCCATATTGACTTCTGGAGGGACTCAGAAGGTTGGAGTTAAGAAGGCTCTCGTTTTTTACGGAGGGAGGCCTCCCAAAGGTATCAAAACC…	MESTDSSSGSQQPQLPPGFRFHPTDEELVVHYLKKKAASAPLPVTIIAEVDLYKFDPWELPDKATFGEQEWYFFSPRDRKYPNGVRPNRAATSGYWKATGTDKPILTSGGTQKVGVKKALVFYGGRPPKGIKTNWIMHEYRLTDGSISKPPIVDIASKKSSLRLDDWVLCRIYKKNNSQKPMDRDKEDSMDDVLGSLPTEMNGPRNQKFQGQKPTSYSVLLENEENFFEGLLTEDGVNGNPNPIPQLATSTSSKTHLSMVPAAIGSLPQKRTLASPYWNEVGSASKRLQSNNDSMIGGSNSNSISTLINQLPQGTPFHHQALLGSMGEGVFRQQYQLPSMNWNS	344	NAC transcription factor	GO:0000003,GO:0003006,GO:0003674,GO:0003700,GO:0006355,GO:0007275,GO:0008150,GO:0009555,GO:0009790,GO:0009791,GO:0009793,GO:0009889,GO:0009908,GO:0010154,GO:0010468,GO:0010556,GO:0019219,GO:0019222,GO:0022414,GO:0031323,GO:0031326,GO:0032501,GO:0032502,GO:0048229,GO:0048316,GO:0048367,GO:0048437,GO:0048438,GO:0048443,GO:0048466,GO:0048608,GO:0048653,GO:0048731,GO:0048827,GO:0048856,GO:0050789,GO:…
MsNAC63	evm.model.ctg50.581	evm.TU.ctg50.581	PF02365.20	No apical meristem (NAM) protein	Chr4	+	149955103	149957044	ATGGGAATCATGGAAGCAGATTCCGTCTCTCAGCTCTCGTTGCCGCCGGGTTTTCGTTTTTTCCCGACGGACGAGGAGCTTTTGGTACAGTACCTATGCCGGAAAGTCGCCGGACAACACTTTTCTCTCCAAATAATCGGCGACGTGGATCTCTACAAGTACGACCCGTGGGTTCTTCCAAGTAAAGCGTTGTTCGGAGAGAAGGAATGGTATTTCTTCAGCCCGAGAGATCGGAAATATCCAAACGGTTCACGACCCAACAGAGTCGCTGGTTCTGGGTATTGGAAGGCAACCGGTACCGATAAGATCATAACGGGCCAAGGTCGGAAAGTTGGGATTAAAAAAGCGCTTGTTTTCTACATTGGAAAAGCCCCAAAAGGGACCAAGACGAACTGGATC…	MGIMEADSVSQLSLPPGFRFFPTDEELLVQYLCRKVAGQHFSLQIIGDVDLYKYDPWVLPSKALFGEKEWYFFSPRDRKYPNGSRPNRVAGSGYWKATGTDKIITGQGRKVGIKKALVFYIGKAPKGTKTNWIMHEYRLSEPTRKKGSLRLDDWVLCRIYKKSSGTQKPVVSVKEQSSNEYSSSSSHLDDVLDSFPEIDNRYFSLPRINSLKSLPDEKFIFQNPGAGNIDWTTPAAQELGSNGQFYRPTSTDFCFPTVPSLCHVESPSDLLDSSIEEEVESGVRLQHMENPLFYQHQQQQQPPTSHWMDQIMASYSTHPISGSFGYQQ	328	NAC domain-containing protein	-
MsNAC64	evm.model.ctg5.161	evm.TU.ctg5.161	PF02365.20	No apical meristem (NAM) protein	Chr1	-	25083038	25098430	ATGGAAAACATGAGAGGCTATTTTACTTTGGACAAGCTACCGTTGGGATTTAGATTCCAACCAACGGATGAAGAGCTGATCGATCACTACCTCAAAGGGAAGATCAACGGTGTTACTTTCGACGTCGATGTCATTCCTGAAATCGATGTTTGCAAATGCGAGCCTGAGGATTTGCCCGGTAAATCATATATTAAAACAGCTGATCCAGAGTGGTTCTTTTTCTCTCGCCGGGATCCGATAAGTGTTAAACGTTCTAGAAGGGCAACACAAACCGGGTACTGGAAACCAACGGGCGAGGATCGCAAGATCAAGTCCAAAACATCTGGGATGAAATTGATTGGGATGAAGAAAACACTTGTTTTCCATAGAGGGCGTGCTCCAGGAGCTAAGGGGACTAGT…	MENMRGYFTLDKLPLGFRFQPTDEELIDHYLKGKINGVTFDVDVIPEIDVCKCEPEDLPGKSYIKTADPEWFFFSRRDPISVKRSRRATQTGYWKPTGEDRKIKSKTSGMKLIGMKKTLVFHRGRAPGAKGTSWTIHEYRVTEDGVNGMAYGQAAFVLCRLFKKHDKKNGRSNRNDREQSDFFPITDNSSPDQTQHAGDAIEQIQMPLNRGIPASDVQEDLQPLHWTVENEPVDSEIWLVDEADHGTTCHPVLDKSRQILVDKLPEALGTSHLDTSVDDYRISPDFFPIYYEYGETQQEGLSQDALQEWLATLSDNPEEDSIIDQTNQNGINYGRASMNMHRVIDDPYESGSPSGWINSLVRNDPCQSDLDMSSEDSQNSFRMRPAQGQKPAPFIGFLQ…	700	No apical meristem (NAM) protein	-
MsNAC65	evm.model.ctg52.34	evm.TU.ctg52.34	PF02365.20	No apical meristem (NAM) protein	Chr5	+	741530	743092	ATGGACAGAGTAAACGGCTCTACTCTTCCTCCTGGATTTAGGTTTCATCCAACTGATGAGGAATTAATCATGTTTTATCTCCGAAATCAAGCCAAATCCATGCCTTGCCCTGTATCGATTATCCCAGAAGTTGATATTTACAAATTCGACCCGTGGGATTTACCTGATAAGGCAGAATTTGGAGAGAATGAGTGGTATTTCTTCAGCCCACGAGATCGGAAATATCCCAATGGTGTACGGCCCAACCGAGCAACAGCATCGGGGTATTGGAAAGCGACGGGTACTGATAAAGCCATCCATAGTGGGTCTAAGTACGTTGGAGTGAAGAAAGCTCTGGTGTTTTACAGGGGTCGGCCCCCAAAGGGAGTCAAGACCGACTGGATCATGCATGAATATCGA…	MDRVNGSTLPPGFRFHPTDEELIMFYLRNQAKSMPCPVSIIPEVDIYKFDPWDLPDKAEFGENEWYFFSPRDRKYPNGVRPNRATASGYWKATGTDKAIHSGSKYVGVKKALVFYRGRPPKGVKTDWIMHEYRLGESTSGPKRIDGSMRLDEWVLCRIYRKRHASRVMEKKQEEPSIENVTSTAVDDSDPQPLKFPRPCSLSHLLELDYMSRLLGDHGLNWMEGIEIMNGGSGSSEMDKTQMPNTAYQFVNSTQLQANTNTMLNQRNYGYPIVEL	275	NAC transcription factor 29-like	GO:0000003,GO:0003006,GO:0003674,GO:0003700,GO:0005575,GO:0005622,GO:0005623,GO:0005634,GO:0006355,GO:0007275,GO:0007568,GO:0008150,GO:0009790,GO:0009791,GO:0009793,GO:0009825,GO:0009835,GO:0009889,GO:0009908,GO:0009987,GO:0010150,GO:0010154,GO:0010468,GO:0010556,GO:0016049,GO:0019219,GO:0019222,GO:0021700,GO:0022414,GO:0031323,GO:0031326,GO:0032501,GO:0032502,GO:0040007,GO:0043226,GO:0043227,GO:…
MsNAC66	evm.model.ctg52.35.1	evm.TU.ctg52.35	PF02365.20	No apical meristem (NAM) protein	Chr5	-	786328	788110	ATGGTTTCAGACAAGGCGGCTGGAACTCAGAACAAGGCGCTTCAAGGAATGGAAAACGGTTCTATTCTGGCCCAAAGAGAGGATCAAATGGAATTGCCTCCAGGTTTCCGATTTCATCCCACTGACGAGGAGCTCATCACTCACTACCTCTCAAAGAAGGTGGTTGACGCCAGCTTCAATGCGAGAGCAATAGGAGAAGTGGATTTAAATAAATGCGAGCCTTGGGATTTGCCATGGAGAGCGAAAATGGGAGAGAAGGAATGGTATTTCTTCTGTGTAAGGGATAGGAAATATCCAACTGGATTGAGGACAAACAGAGCTACTGAATCTGGGTATTGGAAAGCTACAGGGAAAGATAAGGAGATTTACAGAGGAAAGACGCTTGTTGGCATGAAGAAG…	MVSDKAAGTQNKALQGMENGSILAQREDQMELPPGFRFHPTDEELITHYLSKKVVDASFNARAIGEVDLNKCEPWDLPWRAKMGEKEWYFFCVRDRKYPTGLRTNRATESGYWKATGKDKEIYRGKTLVGMKKTLVFYKGRAPKGEKTNWVMHEYRLEGKFSLYNLPKIAKNEWVISRIFQKSSGGKKTHLSGLMRMSSLGNDLGSSLLPPLMDSPYSGRTRTSVSDAAHVSCFSHAMEGHKSQEAMMDSFNSSLFLTPSNPPEISPSSFVFSKIALPTAFYPTQGALNPGNLQYPSSGLMQDQAILRALLGNHGSSMKQNCKTEREMVSISQETGLTTDMNTEISSVISNHEMGRRCFEEQEDPSATAGPVDLDCLWNY	380	(NAC) domain-containing protein	-
MsNAC67	evm.model.ctg52.98	evm.TU.ctg52.98	PF02365.20	No apical meristem (NAM) protein	Chr5	-	2163789	2166699	ATGGATGAGAAGAATGATGTGGACAAGGGAGGTGAAGTGATGCTGCCTGGGTTCAGATTCCATCCGACAGATGAGGAGCTTGTTGGTTTCTATCTGAGAAGAAAGATTCAGCAGAAGCCTCTGTCTATTGAAATTATCAAGCAGCTTGATATCTACAAGTACCACCCATGGGATCTTCCAAAAGAGCTAGCGACTATTGGGGAGAAGGAATGGTATTTCTACTGTCCTAGGGAACGGAAATACAGGAACAGCACAAGGCCTAACAGAGTGACTGGGGGTGGATTTTGGAAAGCTACTGGAACAGACAGACCCATCTACTCCTCAGAAGGAACCAAGTGCATAGGCCTGAAGAAATCCCTGGTCTTCTACAAAGGAAGAGCTGCCAAAGGGATCAAAACC…	MDEKNDVDKGGEVMLPGFRFHPTDEELVGFYLRRKIQQKPLSIEIIKQLDIYKYHPWDLPKELATIGEKEWYFYCPRERKYRNSTRPNRVTGGGFWKATGTDRPIYSSEGTKCIGLKKSLVFYKGRAAKGIKTDWMMHEFRLPSIINSTPTKRPIDKNLPANDSWAICRIFKKTSSMAQRALSNTWVSSLSENTSFDPYSHAVHGTQFTSKNSISSTSQAGSALQFSCNSELQQTMTTASSPLDVLSYKHINPTVCKPPLLPISNMEFPTGLLFPPPEMLGPTKCTIEIASMLQNMSPAIFGDVSRASTNIDFGTQQFNSYNANLQQDTKTNIDNAEGMFLRKNTNDYHENKEWETTRTVGFPFNVPPNPSDEWKSNLSWDSPLCPSEMSTSYSITKCHT	400	(NAC) domain-containing protein	GO:0003674,GO:0003700,GO:0005575,GO:0005622,GO:0005623,GO:0005634,GO:0006355,GO:0007275,GO:0008150,GO:0009719,GO:0009725,GO:0009733,GO:0009786,GO:0009889,GO:0009987,GO:0010033,GO:0010468,GO:0010556,GO:0017145,GO:0019219,GO:0019222,GO:0022622,GO:0031323,GO:0031326,GO:0032501,GO:0032502,GO:0042221,GO:0043226,GO:0043227,GO:0043229,GO:0043231,GO:0044424,GO:0044464,GO:0045770,GO:0048103,GO:0048364,GO:…
MsNAC68	evm.model.ctg55.374	evm.TU.ctg55.374	PF02365.20	No apical meristem (NAM) protein	Chr5	+	20075108	20090104	ATGGCGAGAACATTCCTCCCACCTGGTTTCCGTTTTCATCCAACTGATGTTGAGCTAGTTAGGTACTACCTGAAAAGGAAGGTAGTCGGAAAGCCACTTCATTTCAAAGCCATTTCAGATATTGAATTGTACAAATTTTCTCCTTGGGATCTTCCAGAAAAATCTTGCTTGCAAAGCAAAGATCTCGAGTGGTTTTTCTTTTGCGCTCGAGATAGGAAATATGCAAATGGGCAGAGGGCGAATCGTTCCACTGATAGAGGGTACTGGAAAACCACTGGGAAGGACAGACCTGTCTGTCATAATTCCCAGACTGTAGGGATGAAGAAAACTCTGGTTTTCCATGTAGGTAGGGCACCTCGAGGAGATAGAACTGACTGGGTAATGCACGAGTACAGGCTT…	MARTFLPPGFRFHPTDVELVRYYLKRKVVGKPLHFKAISDIELYKFSPWDLPEKSCLQSKDLEWFFFCARDRKYANGQRANRSTDRGYWKTTGKDRPVCHNSQTVGMKKTLVFHVGRAPRGDRTDWVMHEYRLEDQELVDAGIMQDAFVLCKIFKKSGPGPKNGEQHGAPFREEDWDDDAANNSSLSLPLAGSSSPSPGSADGQNMVMTNCTTEAGIGCDSLLEPHPRLSPVVGEEDPSLLEYFNVNELLSKLSDKDIDASASHGSHTAEKLDLSIPCGTVAVERTDPLNNDEIFNGLDDITSHAELNMINKLYTSNVEDEHALHQMPLNVGDSSYLELNDLQFPVEDDFSEFGKSNDLFAHNNPLDTPASGIDDLSSNLEHQAVMHGPAAPSVQTAEE…	551	NAC domain-containing protein	GO:0003674,GO:0003700,GO:0005575,GO:0005622,GO:0005623,GO:0005634,GO:0005737,GO:0006355,GO:0008150,GO:0009314,GO:0009416,GO:0009628,GO:0009642,GO:0009644,GO:0009889,GO:0009891,GO:0009893,GO:0009962,GO:0010468,GO:0010556,GO:0010557,GO:0010604,GO:0010628,GO:0019219,GO:0019222,GO:0031323,GO:0031325,GO:0031326,GO:0031328,GO:0043226,GO:0043227,GO:0043229,GO:0043231,GO:0044424,GO:0044464,GO:0045893,GO:…
MsNAC69	evm.model.ctg55.403	evm.TU.ctg55.403	PF02365.20	No apical meristem (NAM) protein	Chr5	-	20824599	20825636	ATGAGCTCTATCAACCTCCCTCCTGGTTTCCGATTCCACCCCACCGATGAAGAGCTCATCGTTCATTTCCTCTACCGCAAGGCGGCCCGCTTACCTTGCCACCCCGACATCATCCCCGACATCGAGCTCTACCGCTATGATCCATGGGAACTGAATGGCAAGGCATTGGAAGGAGAAGACCAATGGTATTTTTTCAGCCATAGAACACAAAACCCAGCCACAGCCAATGGTTATTGGAAGCCAATAGGTGTGGATGACACAATCACTAGTGGTAGTAGGACAGTTGGAATGAAGAAATCTCTAATCTTCTACGTCGGTGAATCTCCTTTTGGGATTAAAACCAAATGGGTAATGCATGAGTTTCATCTCTTGGATTGTGCTACTAGTAGTAAATCTTCA…	MSSINLPPGFRFHPTDEELIVHFLYRKAARLPCHPDIIPDIELYRYDPWELNGKALEGEDQWYFFSHRTQNPATANGYWKPIGVDDTITSGSRTVGMKKSLIFYVGESPFGIKTKWVMHEFHLLDCATSSKSSKKRGKPKTVSKDWILCRVHERDSGSQSSFCDEGTELSCLDEVFLSLDDDLDEISLPN	190	NAC transcription factor	GO:0003674,GO:0003700,GO:0006355,GO:0007275,GO:0008150,GO:0009888,GO:0009889,GO:0010087,GO:0010089,GO:0010468,GO:0010556,GO:0010941,GO:0019219,GO:0019222,GO:0031323,GO:0031326,GO:0032501,GO:0032502,GO:0043067,GO:0048367,GO:0048731,GO:0048856,GO:0050789,GO:0050794,GO:0051171,GO:0051252,GO:0060255,GO:0065007,GO:0080090,GO:0140110,GO:1903506,GO:2000112,GO:2001141
MsNAC70	evm.model.ctg55.481	evm.TU.ctg55.481	PF02365.20	No apical meristem (NAM) protein	Chr5	+	23141136	23144404	ATGACGTCCGATTTGCAGATGCCTCCGGGTTTTAGATTCCACCCGACAGATGACGAGCTGGTAATGCACTACCTCTGCCGGAAATGCGCATCTCAGCCTATCTCTGTTCCTATAATTGCAGAGATCGATCTCTACAAATACGATCCATGGCAGCTTCCTGACATGGCTCTTTATGGAGAAAAGGAGTGGTATTTCTTCTCTCCAAGGGACCGTAAGTACCCGAACGGGTCCAGACCGAACCGAGCGGCTGGAACCGGGTACTGGAAGGCTACAGGTGCTGATAAGCCAATCGGGCACCCGAAGCCCGTTGGGATAAAGAAGGCATTGGTATTTTACGCTGGAAAGGCACCAAAGGGTGAGAAAACGAATTGGATCATGCACGAGTATAGGCTGGCCGAC…	MTSDLQMPPGFRFHPTDDELVMHYLCRKCASQPISVPIIAEIDLYKYDPWQLPDMALYGEKEWYFFSPRDRKYPNGSRPNRAAGTGYWKATGADKPIGHPKPVGIKKALVFYAGKAPKGEKTNWIMHEYRLADVDRTARKKNSLRLDDWVLCRIYNKKGALENKHPIMGKKSKSNYSGTEAQEQKPEIQTRGQQQQPVTPMITDFACFDSSDSIPRLHTTDSSCSDHVLSSEFTCEREVQSEPRWKREWERPLDIPINNMDAIAGSARNDLNPFSQFDTVQLSPVFGDPYPDMFMYLQKPF	301	NAC domain-containing protein	GO:0000003,GO:0002831,GO:0003006,GO:0003674,GO:0003676,GO:0003677,GO:0003700,GO:0005488,GO:0005575,GO:0005622,GO:0005623,GO:0005634,GO:0006355,GO:0006950,GO:0007275,GO:0008150,GO:0009266,GO:0009409,GO:0009611,GO:0009628,GO:0009787,GO:0009788,GO:0009790,GO:0009791,GO:0009793,GO:0009889,GO:0009891,GO:0009893,GO:0009966,GO:0009968,GO:0010154,GO:0010468,GO:0010556,GO:0010557,GO:0010604,GO:0010628,GO:…
MsNAC71	evm.model.ctg55.493	evm.TU.ctg55.493	PF02365.20	No apical meristem (NAM) protein	Chr5	-	23450355	23452410	ATGGCAATTGCAGCTTCTATGAGCCACGATGACGAAAAAGATGGCCACGAGCATGATGTTGTCATGCCAGGCTTCCGCTTCCACCCCACCGAAGAAGAGCTTATCGAATTCTACCTCCGCCGCAAGGTCGAAGGGAAGAGATTCAATGTTGAGCTCATTACCTTTCTAGATCTATACCGATATGACCCGTGGGAGCTACCAGCGATGGCGGCTATCGGGGAGAAGGAATGGTACTTCTATGTGCCTAGGGATCGCAAGTACCGGAACGGGGATCGACCCAATCGGGTGACGACTTCTGGATACTGGAAGGCGACGGGAGCTGATCGGACGATCCGGACTGAAAGTTTGAGGTCAATTGGGCTGAAGAAGACACTAGTCTTCTACTCTGGGAAAGCTCCC…	MAIAASMSHDDEKDGHEHDVVMPGFRFHPTEEELIEFYLRRKVEGKRFNVELITFLDLYRYDPWELPAMAAIGEKEWYFYVPRDRKYRNGDRPNRVTTSGYWKATGADRTIRTESLRSIGLKKTLVFYSGKAPKGIRTSWIMNEYRLPQNETDRYQKAEISLCRVYKRAGVEDHCPLPNSLSSKPSSSRGVQSNRRHNTDLQATTSSQTPRLNSSLIGKLDEAGSSTSATDDDGTELGLSRHKAFGAMDPGAPMDSTSTEDDVSLLHSKQASSLLPTCTLLPPSSSSIPVTAIDELRRLVDYQHIYTHHPAHILPPSSSSQPPFLSLNNQPNSMPTFSDKLWEWNPIPDANRDYTSYK	358	NAC domain-containing protein	GO:0003674,GO:0003700,GO:0006355,GO:0008150,GO:0009889,GO:0010468,GO:0010556,GO:0019219,GO:0019222,GO:0031323,GO:0031326,GO:0050789,GO:0050794,GO:0051171,GO:0051252,GO:0060255,GO:0065007,GO:0080090,GO:0140110,GO:1903506,GO:2000112,GO:2001141
MsNAC72	evm.model.ctg5.74	evm.TU.ctg5.74	PF02365.20	No apical meristem (NAM) protein	Chr1	-	22295245	22296965	ATGAGTTCGCAGATGAATGGTCAGTGTCGCGTCCCACCTGGCTTCCGCTTCCATCCAACAGAGGAAGAGCTTTTGCACTATTACTTGAGGAAGAAGGTGGCGTTTGAGAAGATAGATTTGGATGTTATCCGAGACGTTGATCTCAATAAACTCGAGCCTTGGGATATACAAGAGAAGTGCAAAATCGGATCAACCCCACAAAACGACTGGTATTTCTTTAGTCACAAAGACAAGAAGTATCCCACAGGCACTCGGACAAACCGCGCCACGGCCGCTGGATTCTGGAAAGCGACTGGTCGTGATAAGGTTATCTACACCAACTTAAAAAGGATCGGAATGAGGAAAACACTAGTATTTTATAAAGGGAGGGCGCCTCACGGTCAGAAATCCGATTGGATT…	MSSQMNGQCRVPPGFRFHPTEEELLHYYLRKKVAFEKIDLDVIRDVDLNKLEPWDIQEKCKIGSTPQNDWYFFSHKDKKYPTGTRTNRATAAGFWKATGRDKVIYTNLKRIGMRKTLVFYKGRAPHGQKSDWIMHEYRLDDNNDINPQSNASSSMGESQEDGWVVCRIFKKKNHIKALDNPNRSSIHGDGQTQVGHSSRDGALEQILQYMGRTCKQENDTNTNKNNNNNNININTNSIRYLGLMGEAESAIDNGAFEGFIQLPPLESPTLPMLHNDSRPPDLGCSSQNCCPPMDSHFITPTTYVEASITNPSNINHQAETSLSDWAALDRFVASHLNGQTETSKQLACFDDPNLTFCSVPDQDLSLPLHLRSSNRSFNTSQDLYNNDTDLWDFARSSSS…	411	NAC domain-containing protein	GO:0000003,GO:0003674,GO:0003676,GO:0003677,GO:0003700,GO:0005488,GO:0005575,GO:0005622,GO:0005623,GO:0005634,GO:0006355,GO:0008150,GO:0009832,GO:0009834,GO:0009889,GO:0009891,GO:0009893,GO:0009900,GO:0009987,GO:0010047,GO:0010468,GO:0010556,GO:0010557,GO:0010604,GO:0010628,GO:0016020,GO:0019219,GO:0019222,GO:0022414,GO:0031323,GO:0031325,GO:0031326,GO:0031328,GO:0032501,GO:0032504,GO:0042546,GO:…
MsNAC73	evm.model.ctg58.23	evm.TU.ctg58.23	PF02365.20	No apical meristem (NAM) protein	Chr5	+	37725622	37730445	ATGGCGCCGGTCGGATTACCACCAGGTTTCAGGTTCCATCCCACCGATGAAGAGCTCGTAAATTACTATCTAAAGAGGAAAATCCATGGCCTCAAGATAGAGCTTGACATCATTCCTGAAGTTGATCTTTACAAATGTGAACCTTGGGAATTAGCAGATAAATCGTTCTTACCAAGTAGAGATCCTGAGTGGTATTTTTTCGGGCCACGGGATCGGAAATATCCTAATGGATTTAGAACAAACCGTGCAACTAGAGCTGGATACTGGAAATCTACAGGGAAGGATCGGCGTGTTAGCTATCAGAATCGGGCCATTGGTATGAAGAAGACATTGGTTTACTACAGAGGTAGAGCTCCTCAGGGAATCAGAACAGACTGGGTGATGCATGAATACCGCCTC…	MAPVGLPPGFRFHPTDEELVNYYLKRKIHGLKIELDIIPEVDLYKCEPWELADKSFLPSRDPEWYFFGPRDRKYPNGFRTNRATRAGYWKSTGKDRRVSYQNRAIGMKKTLVYYRGRAPQGIRTDWVMHEYRLDDKECEDTMGLQDSYALCRVFKKNGPCTEIEEQGQCSISLLESSQGIINDYETMSPDVPVGSSSCMDEDDKDDAWMQFITEDAWCSASASTGGDDSGCMAFAN	236	NAC domain-containing protein	-
MsNAC74	evm.model.ctg58.24	evm.TU.ctg58.24	PF02365.20	No apical meristem (NAM) protein	Chr5	-	37732047	37742361	ATGGCACCAGTGACATTGCCTCCCGGCTTCCGCTTCCATCCAACCGATGAAGAACTTGTGATCTACTACCTCAAGAGAAAGATCAACGGCCGAAAGATTGAGTTGGAGATCATCCCCGAAGTCGATCTCTACAAATGCGAGCCTTGGGATTTACCAGAGAAATCTTTCTTACCAAGCAAAGATCTTGAGTGGTATTTCTTCAGCCCTAGAGATCGAAAATACCCAAACGGCTCCAGGACTAACCGTGCAACTCGATCTGGCTACTGGAAGGCAACCGGAAAGGACCGGAATGTGAGGTCTCAGACGCGTGCAGTGGGCATGAAGAAGACCTTGGTTTACTATAGAGGCAGGGCCCCTCATGGGACTCGAACCGACTGGGTCATGCATGAGTACCGACTA…	MAPVTLPPGFRFHPTDEELVIYYLKRKINGRKIELEIIPEVDLYKCEPWDLPEKSFLPSKDLEWYFFSPRDRKYPNGSRTNRATRSGYWKATGKDRNVRSQTRAVGMKKTLVYYRGRAPHGTRTDWVMHEYRLDENECETNTGLQDAYALCRVFKKSLTGLKISNTFNATSDQPSHWVPYDHSSTVDLSYDGRGEDMDSSGYPFQLDTRPSDMFQGAPFDVNAQSDGQWMQFLAEEMQGPTESPFQDHRSHGILPSKVNVGCARLQQRLSLPAWESMEDFSQFNIADSKFLHSGHTNMNETDTLSEFLSVACASQELMNQPNYQDMWTGSYPCLDEFAPLGIGGRTEETQHCQIGDMGSSRFIEKLCGVEEEQARFVDISDLEEEFKEEKMVENLRRAK…	695	NAC domain-containing protein	GO:0001067,GO:0003674,GO:0003676,GO:0003677,GO:0003700,GO:0005488,GO:0005575,GO:0005622,GO:0005623,GO:0005634,GO:0005737,GO:0006355,GO:0008150,GO:0009314,GO:0009416,GO:0009628,GO:0009642,GO:0009644,GO:0009889,GO:0009891,GO:0009893,GO:0009962,GO:0009987,GO:0010468,GO:0010556,GO:0010557,GO:0010604,GO:0010628,GO:0016043,GO:0019219,GO:0019222,GO:0022411,GO:0030154,GO:0031323,GO:0031325,GO:0031326,GO:…
MsNAC75	evm.model.ctg58.251	evm.TU.ctg58.251	PF02365.20	No apical meristem (NAM) protein	Chr5	+	47340184	47355766	ATGAACGCTGCAACTTCAGCCGAGCTAGAACTTCCAGGATTCAGATTCCACCCCACTGAAGAAGAGCTCCTTGAGTACTATCTCCATGGAGTTTTATACGGTAAAAAGCTCAGCTTTGATGTAATCGGAACCGTGAACATATACTGTCATGACCCTTGGGAATTGCCTGGGTTGGCTAAGATTGGAGAGAGGGAATGGTACTTCTTTGTGCGTAGGGACAGGAGTAATTTGCAAGGGAGGCGGCCCAATCGGACGACCGAGAATGGTTTTTGGAAGGCGACTGGTTCGGACCGTCCGATACGGAGCGTCAAGGACCCGAAAAGAATCCTAGGGTTGAGGAAGACGTTAGTATTCTATAATGGTAGGGCCCCAAGAGGGTGCAAAACGGATTGGGTGATG…	MNAATSAELELPGFRFHPTEEELLEYYLHGVLYGKKLSFDVIGTVNIYCHDPWELPGLAKIGEREWYFFVRRDRSNLQGRRPNRTTENGFWKATGSDRPIRSVKDPKRILGLRKTLVFYNGRAPRGCKTDWVMNEYRMPDAHPLPKENIVLCNIYRKAMSLKALEERVATEDDARPLKECLSLIGNVSSHEDENIHLPVPLEDDVLMEKMENIKESQLVLQHQQQQQRAGVEKEV	235	NAC domain-containing protein 94	GO:0003674,GO:0003676,GO:0003677,GO:0005488,GO:0005575,GO:0005622,GO:0005623,GO:0005634,GO:0006355,GO:0008150,GO:0009889,GO:0009891,GO:0009893,GO:0010468,GO:0010556,GO:0010557,GO:0010604,GO:0010628,GO:0019219,GO:0019222,GO:0031323,GO:0031325,GO:0031326,GO:0031328,GO:0043226,GO:0043227,GO:0043229,GO:0043231,GO:0043565,GO:0044424,GO:0044464,GO:0045893,GO:0045935,GO:0047484,GO:0048518,GO:0048522,GO:…
MsNAC76	evm.model.ctg6.132	evm.TU.ctg6.132	PF02365.20	No apical meristem (NAM) protein	Chr1	+	32653619	32665888	ATGACTCAGTTGCCCAGGATGTTGCTTGGTTTTCTACGAGTCGATCAGTACTTGAAGCGGTGTAGAGACCTCGGTGACTACCCGTACATCTATCCCCAGGTCGGGAGGGGCAGGGGTAGGGACGCCGGACAAATTGCAGCAAGGGGATGGGCACCGGGTAGGGCAGGGACGAGCTGCGGCAAGGGGAGGGGCACAGGCAGGGCAGCGACGAGCTGCGGTAGGGGCAAGGGCACCATGCAGGGCAGCGACGAGTTGCGGATGAGACTTGGGAGAGAGAGGGAAGAAGCTTGGGTTGCCATGAAAATCTTCAATCACTTCGAAAGCGGTGAGAACCAACTTCCTCCGGGCTTCCGATTCCACCCAAATGATGAAGAGCTTATAACATACTATCTCATGGAG…	MTQLPRMLLGFLRVDQYLKRCRDLGDYPYIYPQVGRGRGRDAGQIAARGWAPGRAGTSCGKGRGTGRAATSCGRGKGTMQGSDELRMRLGREREEAWVAMKIFNHFESGENQLPPGFRFHPNDEELITYYLMEKVINSNFTGRAIAEVDLNKCEP	155	Protein CUP-SHAPED COTYLEDON 2-like	GO:0000003,GO:0001763,GO:0003006,GO:0003674,GO:0003700,GO:0006355,GO:0007275,GO:0008150,GO:0009653,GO:0009790,GO:0009791,GO:0009793,GO:0009888,GO:0009889,GO:0009908,GO:0009933,GO:0010014,GO:0010016,GO:0010072,GO:0010154,GO:0010223,GO:0010346,GO:0010468,GO:0010556,GO:0019219,GO:0019222,GO:0022414,GO:0022603,GO:0022622,GO:0031323,GO:0031326,GO:0032501,GO:0032502,GO:0040034,GO:0048316,GO:0048364,GO:…
MsNAC77	evm.model.ctg67.168	evm.TU.ctg67.168	PF02365.20	No apical meristem (NAM) protein	Chr5	+	130249780	130254102	ATGGAAGTGGAATCATGTGTCCCACCTGGATTTAGATTCCATCCCACAGAAGAAGAGCTTGTGGGTTATTACCTAACCAGGAAAGTTGCTTCTCAAAAGATTGATTTAGGTGTCATCACAGACGTTGATCTCTACAGAATAGAGCCATGGGATCTCGAAGAAAGATGCAAGCTTGGTTATGAAGAGCAAAGTGAATGGTACTTCTTCAGTCACAAAGATAAGAAGTATCCGACCGGAACTCGAACAAATAGAGCTACTGCAGCTGGATTTTGGAAGGCGACAGGCCGCGATAAGGCAGTGATTTCAAAGATGAAAATAATAGGAATGAGGAAGACATTGGTGTTCTATAAGGGACGCGCACCCAATGGAAGAAAAACCGATTGGATCATGCACGAATAC…	MEVESCVPPGFRFHPTEEELVGYYLTRKVASQKIDLGVITDVDLYRIEPWDLEERCKLGYEEQSEWYFFSHKDKKYPTGTRTNRATAAGFWKATGRDKAVISKMKIIGMRKTLVFYKGRAPNGRKTDWIMHEYRLQTTEHAPPQDEGWVVCRAFKKQSPNQRRTFDGWNPAYYIREPDHAGFQPLTDTFSPSQFVDSYHGAHSHEQSYCGDQDLQLKPNYSSQLIELPQLESPSLSTSLANKEGFEASIPTNGDQCNNKDDYGPQFIDWKALDKLLASQLNDVSSCPSSNVPLIPFDHYEPDAINHGNHFVSSFPNS	317	(NAC) domain-containing protein	GO:0001067,GO:0001101,GO:0003674,GO:0003676,GO:0003677,GO:0003700,GO:0005488,GO:0005515,GO:0005575,GO:0005622,GO:0005623,GO:0005634,GO:0005975,GO:0005976,GO:0006355,GO:0006950,GO:0006952,GO:0008150,GO:0008152,GO:0009605,GO:0009607,GO:0009620,GO:0009719,GO:0009725,GO:0009733,GO:0009735,GO:0009737,GO:0009741,GO:0009888,GO:0009889,GO:0009891,GO:0009893,GO:0009987,GO:0010033,GO:0010087,GO:0010089,GO:…
MsNAC78	evm.model.ctg67.447	evm.TU.ctg67.447	PF02365.20	No apical meristem (NAM) protein	Chr5	+	141047556	141050300	ATGGAGGAAAATCTACCACCTGGTTTTAGATTTCACCCAACTGATGAAGAACTCATCACATACTATCTGACTAGAAAGGTCTCTGATTTCAACTTCGTGGCCCGGGCGATCACAGACGTCGATCTCAACAAGTGCGAGCCTTGGGACCTCCCAGGCAAAGCTTCCATGGGAGAGAAAGAGTGGTATTTTTTCAGTTTGAAAGATCGAAAATATCCAACCGGCCTTAGAACGAACCGAGCAACGGACGCAGGCTACTGGAAGACCACCGGCAAAGATAAGGAGATCTTCCATGGAGGAATGATGGTTGGAATGAAGAAAACCCTAGTTTTTTACAAGGGAAGAGCTCCAAGAGGAGAAAAAAGCAACTGGGTCATGCATGAATATAGACTCAATACCAAA…	MEENLPPGFRFHPTDEELITYYLTRKVSDFNFVARAITDVDLNKCEPWDLPGKASMGEKEWYFFSLKDRKYPTGLRTNRATDAGYWKTTGKDKEIFHGGMMVGMKKTLVFYKGRAPRGEKSNWVMHEYRLNTKLAFKPTKEEWVVCRVFQKSASGKKIPQSPSSLPPLLESSCDTTLLSELGEIDTSNLSSLANFSSGYNTISTNDNNNHNHNHNHNNNVNMDMNWEFGSEMTNHPSVTWPSNLLNSNFSANSSILRALQFNAYQTREATTGISSFLAQGESLGTNSNSNFHAASSSKGADFAQPQQNQFSLESIWRSC	319	No apical meristem (NAM) protein	-
MsNAC79	evm.model.ctg67.626	evm.TU.ctg67.626	PF02365.20	No apical meristem (NAM) protein	Chr5	+	147163863	147165129	ATGTTGGGTCAGTCAGCTTGGGTTGCCATGGAAATCTTCAATCACTTTGATAGCCGTGAGAACCAACTTCATTCGGGCTTCCAATTCCTCCCAACTGACGAAGAGCTTATAACATACTATCTCATGAAGAAGGTCATCAATAGCAGTTTCACAGGCCGAGCCATTGCCGAAATGAACCTCAACAAGTGCGAGCTATGGCAGCTTCCCGATACACATTTCGATCTCGATCTCATTTCCTCACCAGATTCTCTTATCTAA	MLGQSAWVAMEIFNHFDSRENQLHSGFQFLPTDEELITYYLMKKVINSSFTGRAIAEMNLNKCELWQLPDTHFDLDLISSPDSLI	85	Protein CUP-SHAPED COTYLEDON 2-like	GO:0000003,GO:0001763,GO:0003006,GO:0003674,GO:0003700,GO:0006355,GO:0007275,GO:0008150,GO:0009653,GO:0009790,GO:0009791,GO:0009793,GO:0009888,GO:0009889,GO:0009908,GO:0009933,GO:0010014,GO:0010016,GO:0010072,GO:0010154,GO:0010223,GO:0010346,GO:0010468,GO:0010556,GO:0019219,GO:0019222,GO:0022414,GO:0022603,GO:0022622,GO:0031323,GO:0031326,GO:0032501,GO:0032502,GO:0040034,GO:0048316,GO:0048364,GO:…
MsNAC80	evm.model.ctg72.409	evm.TU.ctg72.409	PF02365.20	No apical meristem (NAM) protein	Chr6	-	16615236	16620793	ATGATGCCGGGAAATGGGCAGGTATCAGTTCCTCCAGGATTTCGTTTCCATCCAACGGATGAAGAGCTCCTCTACTATTATCTGAGGAAGAAGGTGGCGTATGAGGCCATCGACCTTGATGTAATAAGAGATGTCGACCTCAATAAACTCGAACCTTGGGATCTCAAAGATGCAGATAGATGTAGAATCGGATCCGGTCCTCAGACTGAGTGGTATTTCTTCAGCCACAAAGACAAGAAGTACCCAACCGGAACCCGGACCAATCGAGCGACAACGGCCGGCTTCTGGAAAGCGACAGGGAGAGATAAAGCCATTCACCTCAACAATTCCAAGAGGATTGGCATGAGGAAGACCCTGGTTTTCTACACAGGCCGTGCCCCTCATGGACAAAAGACAGAC…	MMPGNGQVSVPPGFRFHPTDEELLYYYLRKKVAYEAIDLDVIRDVDLNKLEPWDLKDADRCRIGSGPQTEWYFFSHKDKKYPTGTRTNRATTAGFWKATGRDKAIHLNNSKRIGMRKTLVFYTGRAPHGQKTDWIMHEYRLDDDNVDVQEEGWVVCRVFKKKNHQTAFQAESSTVEEVHQFNHINQISGPSPSDRKHNFHMPYDPALDNSMHLPQLLSTESIVAPSFLPPICLSSMDVQCSQNLMRLTGGGGIMQEERINGEWSFLDKLLASHHCLEQLSSVQRLPFQYIGCGADFLKFSK	301	NAC domain-containing protein	GO:0003002,GO:0003674,GO:0003700,GO:0005575,GO:0005622,GO:0005623,GO:0005634,GO:0006355,GO:0007275,GO:0007389,GO:0008150,GO:0009832,GO:0009834,GO:0009889,GO:0009987,GO:0010453,GO:0010455,GO:0010468,GO:0010556,GO:0019219,GO:0019222,GO:0022622,GO:0031323,GO:0031326,GO:0032501,GO:0032502,GO:0042546,GO:0043226,GO:0043227,GO:0043229,GO:0043231,GO:0044085,GO:0044424,GO:0044464,GO:0045595,GO:0045597,GO:…
MsNAC81	evm.model.ctg72.59	evm.TU.ctg72.59	PF02365.20	No apical meristem (NAM) protein	Chr6	-	6694043	6698600	ATGGAAATCTTCAACAACGTCAACATAGCGGAAGCGCAGCTTCCACCCGGTTACCGATTCCATCCCACTGATGAAGAGCTTATAACATACTATCTCATTAAGAAGGTCATCGACAGCAGCTTCAGGGGCCGAGCGATTGCAGAAGTAGACCTGAACAAATGCGAGCCATGGGAACTTCCAAAGAAAGCAAAGATGGGAGAAAAGGAATGGTATTTCTTCAGCCTCCGGGATAGGAAGTATCCAACCGGGCTTCGAACGAACAGAGCGACGGAAGCTGGGTACTGGAAAGCTACAGGAAAAGATAGAGAGATTTACAGCTCAAGGACAGGATCGCTTGTGGGGATGAAGAAGACTCTGGTTTTCTACAAAGGGAGAGCTCCAAAAGGAGAAAAAACCAAT…	MEIFNNVNIAEAQLPPGYRFHPTDEELITYYLIKKVIDSSFRGRAIAEVDLNKCEPWELPKKAKMGEKEWYFFSLRDRKYPTGLRTNRATEAGYWKATGKDREIYSSRTGSLVGMKKTLVFYKGRAPKGEKTNWVMHEYRLEGKFSYHYLSRSSKDEWVVSRVFQKTGTGSGKKAARLFSAGTYSDAGSPSSSSLPQLLDSSPYGPPAAAGSATDRDSCSYESESAREHVPCFSTTVAAPAGFEHQPFVPPSIITDPIARLGRAGSGPVFPSLRSLQENLQLPFFFSSVAPQMPPQAMVSGERNEIVGGCSLAGNWPESSEQKVERSKQQVQVGSTELDCLWTY	344	Protein CUP-SHAPED COTYLEDON	GO:0000003,GO:0001763,GO:0003006,GO:0003674,GO:0003700,GO:0006355,GO:0007275,GO:0008150,GO:0009653,GO:0009790,GO:0009791,GO:0009793,GO:0009888,GO:0009889,GO:0009933,GO:0010014,GO:0010016,GO:0010072,GO:0010154,GO:0010223,GO:0010346,GO:0010468,GO:0010556,GO:0019219,GO:0019222,GO:0022414,GO:0022603,GO:0031323,GO:0031326,GO:0032501,GO:0032502,GO:0040034,GO:0048316,GO:0048366,GO:0048367,GO:0048507,GO:…
MsNAC82	evm.model.ctg72.80	evm.TU.ctg72.80	PF02365.20	No apical meristem (NAM) protein	Chr6	+	7349209	7356816	ATGACGTGGATGGACGGTTGCAATTCATTGGAAGAGGATAATGAAATAAAGATCTGCTGTCCATCATGTGGCCATCCCATCCAATCCCGACACCAGGCAGGGATTCATGAATTACCAGGACTACCAGCAGGAGTGAAGTTCGATCCAACGGACCAAGAGCTAATGGAACATTTAGAGGGTAAGGTGAGGCTGGATACTGGAAAAATTCATCCTCTCATCGATGAATTCATTCCTACCCTCGATGGAGATAATGGCATTTGTTACACCCACCCTGAGAAGCTTCCAGGAGTAAGCAGAGATGGCCTAGTTCGGCACTTCTTCCATTGCCCTTCCAAGGCGTACATGACGGGCACCAGGAAGCGAAGGAGGGTGGACACCAATGTGCAAGGTGGTGAGACA…	MTWMDGCNSLEEDNEIKICCPSCGHPIQSRHQAGIHELPGLPAGVKFDPTDQELMEHLEGKVRLDTGKIHPLIDEFIPTLDGDNGICYTHPEKLPGVSRDGLVRHFFHCPSKAYMTGTRKRRRVDTNVQGGETRWHKTGKTRPILVDGMVKGHKKILVLYTNYGRQRKPEKTNWVMHQYHLGPNEDEKDGELVVSKVFYQTQPRQCNSSSKDQDRLHSHASKETRLVDCHNSSIITYDEQVGHSRERESSLQLVIPSFSVQENVSSFLT	269	(NAC) domain-containing protein	GO:0000075,GO:0000077,GO:0003674,GO:0003676,GO:0003677,GO:0003700,GO:0005488,GO:0005575,GO:0005622,GO:0005623,GO:0005634,GO:0006355,GO:0006950,GO:0006974,GO:0008150,GO:0009314,GO:0009628,GO:0009889,GO:0009891,GO:0009893,GO:0009987,GO:0010212,GO:0010332,GO:0010468,GO:0010556,GO:0010557,GO:0010564,GO:0010604,GO:0010628,GO:0019219,GO:0019222,GO:0031323,GO:0031325,GO:0031326,GO:0031328,GO:0031570,GO:…
MsNAC83	evm.model.ctg72.81	evm.TU.ctg72.81	PF02365.20	No apical meristem (NAM) protein	Chr6	-	7361103	7368620	ATGGAAGTTGTGAATTTAACAAATCCTCCTCTCCCTCCAGGCTTCAGATTCCACCCCACTGATCAAGAGCTAATAATACATTACCTGAAGAAGAAGGTCTCTTCTTCCCAAACTCCGGCATTCTCTATAATCGCAGACGTAGATCTCTACAAATACAGTCCATGGGAACTCCCTGGGAAGGCTTTCTTTGGAGAGAGTGAGTGGTTCTTCTTTAGTCCAAGAGATCGTAAGTACCCAAACGGAGCTCGGCCAAATCGATCGGCTGGGACTGGTTACTGGAAAGCTACTGGAACTGATAAACCAATCCTTGCATCATGCGGATCACAGTGCCTAGGTGTGAAGAAAGCTCTGGTGTTCTACAATGGTCGCCCTCCCAAGGGCGTGAAAACAGATTGGGTG…	MEVVNLTNPPLPPGFRFHPTDQELIIHYLKKKVSSSQTPAFSIIADVDLYKYSPWELPGKAFFGESEWFFFSPRDRKYPNGARPNRSAGTGYWKATGTDKPILASCGSQCLGVKKALVFYNGRPPKGVKTDWVMHEYRLLEGSPGSQRLKGSMRKTKGKKKKKKKKIAKERSETEMRQMLGFRGTASKDTSDSSTKSLSQSPQSSSPTVVAAGPVRPLRLIYCDEKGKFRIDPEAVAALQLVKGPVGVVSVSVCGQARQGKSFILNQGVLREEYKGTVQKTLAAFNASAVRVGSAQQKYEKLMQQFFKKAFEVF	314	No apical meristem (NAM) protein	-
MsNAC84	evm.model.ctg75.71	evm.TU.ctg75.71	PF02365.20	No apical meristem (NAM) protein	Chr6	+	30458308	30465125	ATGGGTTTGAGAGGCATAGAGGCTACACTTCCACCAGGGTTTAGGTTCTATCCTAGTGATGAAGAGTTGGTTTGCCACTATTTATATAAAAAGGTTGCTAATGAGGGGCTCTCTCATGGGACCTTGGTGGAGGTAGACTTGCATACATGTGAGCCATGGCAGCTACCAGATGTGGCTAAGCTTGGTGCCAATGAGTGGTACTTCTTCAGTTTTCGGGACCGGAAATACGCTACTGGCATGCGTGCAAATCGAGCAACTATCTCTGGTTATTGGAAAGCTACAGGAAAAGATCGCCCGATTTTCAACCCCAACACGCAAGCGATCATAGGCATGAGGAAGACTTTAGTTTTCTATCGCGAAAGAGCTCCGAACGGAATAAAGACGGGTTGGGTCATGCAC…	MGLRGIEATLPPGFRFYPSDEELVCHYLYKKVANEGLSHGTLVEVDLHTCEPWQLPDVAKLGANEWYFFSFRDRKYATGMRANRATISGYWKATGKDRPIFNPNTQAIIGMRKTLVFYRERAPNGIKTGWVMHEFRIESNQTAPKEDWVLCRVFHKNKGGPSTKFRLEFEQDNIGSSSPNLGTSLPNTIQQSMQNGYDQMISFSNIPSQEVDNSPPNTMLNLALWRYNFLGFPQDVDNTPIVSSMNTSGGDDEYGFLLDMALEGHGLGIGGPLNLDQRRLEDEKKKGRLL	290	NAC domain-containing protein 21	GO:0000003,GO:0003006,GO:0003674,GO:0003700,GO:0005575,GO:0005622,GO:0005623,GO:0005634,GO:0006355,GO:0007154,GO:0007165,GO:0007275,GO:0008150,GO:0009653,GO:0009719,GO:0009725,GO:0009733,GO:0009734,GO:0009755,GO:0009790,GO:0009791,GO:0009793,GO:0009888,GO:0009889,GO:0009933,GO:0009987,GO:0010014,GO:0010016,GO:0010033,GO:0010072,GO:0010154,GO:0010468,GO:0010556,GO:0019219,GO:0019222,GO:0022414,GO:…
MsNAC85	evm.model.ctg75.72	evm.TU.ctg75.72	PF02365.20	No apical meristem (NAM) protein	Chr6	+	30481665	30483347	ATGCGTGCAAATCGAGCAACTATCTCTGGTTATTGGAAAGCTACCGGAAAAGATCGCCTGATTTTCAACCCCAACACGCAAGCGATCATAGGCATGAGGAAGACATTAGTTTTCTATCGCGAAAGAGCTCCGAACGGGATAAAGACGGGTTGGGTCATGCACGAATTTCGTATAGAGAGCAACCAAACGGCTCCTAAGGAGGATTGGGTTTTATGCAGAGTTTTCCACAAGAACAAAGGAGGGCCATCCACCAAATTTAGACTTGACTTTGAGCAAGACAACATTGGCAGCTCTTCTCCAAATTTGGGGACATCTCTTCCAAAAACTATTCAGCAAAGCATGCAAAATGGGTATGATCAAATGATCTCATTCTCCAATATCCCTTCCCAAGAAGTAGAC…	MRANRATISGYWKATGKDRLIFNPNTQAIIGMRKTLVFYRERAPNGIKTGWVMHEFRIESNQTAPKEDWVLCRVFHKNKGGPSTKFRLDFEQDNIGSSSPNLGTSLPKTIQQSMQNGYDQMISFSNIPSQEVDNSPPNAMLNLALWRYNFLGFPQDVDNTPIVSSMNTNGGDDDYGFLLHMALEGHGLGIGGPLNLDQRRLEDEKKKGGLL	211	No apical meristem protein	GO:0000003,GO:0003006,GO:0003674,GO:0003700,GO:0005575,GO:0005622,GO:0005623,GO:0005634,GO:0006355,GO:0007154,GO:0007165,GO:0007275,GO:0008150,GO:0009653,GO:0009719,GO:0009725,GO:0009733,GO:0009734,GO:0009755,GO:0009790,GO:0009791,GO:0009793,GO:0009888,GO:0009889,GO:0009933,GO:0009987,GO:0010014,GO:0010016,GO:0010033,GO:0010072,GO:0010154,GO:0010468,GO:0010556,GO:0019219,GO:0019222,GO:0022414,GO:…
MsNAC86	evm.model.ctg83.103	evm.TU.ctg83.103	PF02365.20	No apical meristem (NAM) protein	Chr6	+	126162137	126164491	ATGGACAAGATGAACTTTGTTAGGAATGGAGTGATGAGATTGCCGCCTGGGTTCCGTTTCCATCCCACCGATGAAGAGCTTGTCGATCAGTACCTTAAGCGCAAGGTCTTCTCATTCCCTTTGCCCGCTTCAATCATTCCTGAGATCGATGTTTGCAAGTTTGATCCTTGGGATTTGCCAGGGAATTCAAAGCTGGAGAGGTATTTTTTCAGCACCAGACAGGTGAAATACCTGAACGGAAATAGACCCAACAGAGCAACCAGTTCGGGCTATTGGAAGGCATCAGGTCGAGATAAGCAAATTGTAGCTTCTAAAAGCAATCAAGTGGTTGGGATGAAGAAAGTGCTGGTCTTCTACAGAGGAAAGCCTTCAAGGGGCATTAGAACTGATTGGATCATG…	MDKMNFVRNGVMRLPPGFRFHPTDEELVDQYLKRKVFSFPLPASIIPEIDVCKFDPWDLPGNSKLERYFFSTRQVKYLNGNRPNRATSSGYWKASGRDKQIVASKSNQVVGMKKVLVFYRGKPSRGIRTDWIMHEYRLSDAGSRGCISPQRKNSTQQNSTVQMEDWVLCRIFLKNQSPKNDVEIAQPSSMTRVRNLGVARNGFIDFMGRSTVHSNSPPPSSSSSNSSSITELSSAESHKEENSSCDSFSSSSCGREA	257	NAC transcription factor	-
MsNAC87	evm.model.ctg86.60	evm.TU.ctg86.60	PF02365.20	No apical meristem (NAM) protein	Chr7	+	6072834	6076487	ATGGAAATCTTCAATCACTTCGACAACGGGGAGAACCAACTTCCTCCGGGCTTCCGATTCCACCCAACTGACGAAGAGCTTATAACATACTATCTCATGAAGAAGGTCATTGATAGCAGTTTCACAGGCCGAGCCATTGCCGAAGTGGACCTCAACAAGTGCGAGCCATGGCAGCTTCCTGAAAAGGCGAAGATGGGCGAAAAGGAATGGTATTTCTTCAGCCTCCGGGATCGGAAGTACCCAACTGGGCTTCGAACAAACAGAGCGACGGAAGCCGGGTACTGGAAGGCTACTGGAAAAGATAGAGAGATTTACAGTTCTAGAACTGGATCTCTGGTGGGGATGAAGAAGACTCTGGTTTTTTACAAAGGGAGAGCTCCAAAGGGAGAAAAGAGCAAC…	MEIFNHFDNGENQLPPGFRFHPTDEELITYYLMKKVIDSSFTGRAIAEVDLNKCEPWQLPEKAKMGEKEWYFFSLRDRKYPTGLRTNRATEAGYWKATGKDREIYSSRTGSLVGMKKTLVFYKGRAPKGEKSNWVMHEYRLEGKFSYHYLTRSSKDEWVVSRVFQKSGVSGGKKARIGGGAGFTDVGSPSSSSIPPLLESSTYTAAAAADRESGSYESESTREHVSCFSTVATASNLNPQPMVPASFLTDPTGQFGRNGGGVPTFPSLRSLHENLQLPFFYSAVAPMPTLASASSSVSPSEMGGCGLAGNWTGAVQKVERSRQQLQMGGTELDCMWTY	338	Protein CUP-SHAPED COTYLEDON	GO:0000003,GO:0001763,GO:0003006,GO:0003674,GO:0003700,GO:0006355,GO:0007275,GO:0008150,GO:0009653,GO:0009790,GO:0009791,GO:0009793,GO:0009888,GO:0009889,GO:0009933,GO:0010014,GO:0010016,GO:0010072,GO:0010154,GO:0010223,GO:0010346,GO:0010468,GO:0010556,GO:0019219,GO:0019222,GO:0022414,GO:0022603,GO:0031323,GO:0031326,GO:0032501,GO:0032502,GO:0040034,GO:0048316,GO:0048366,GO:0048367,GO:0048507,GO:…
MsNAC88	evm.model.ctg86.61	evm.TU.ctg86.61	PF02365.20	No apical meristem (NAM) protein	Chr7	-	6078790	6096919	ATGAGACATAAGATGAGTTTCCCACCTGGCTATAGATTTGTCCCGACTGATGCAGAATTACTTGTTCATTATCTAAAAAACAAGAATCTGGGTCATCCTCTCCCCATTGATATAATCCCAGAATGCAACATCTATAAGTACAATCCCGACCAACTTTTATGTGATTTTTACAATGGAACGGGGAACGAGATGTATTTTTTTACCCAGCGGGAACGAAAGTATGAGGGTGGGTCACGCCCAGATCGCAAAGCGGCCAACGGATATTGGAAGGCCACCGGTGGAAATACAAAAGTTACTGACGGAGATAAAACAGTTGGTTATAAGATGAGTTTGAAATTTCATAAGGGAAAAGCACCCAAGGGAGAGAAAACTGATTGGCTGATGGAGGAGTATAGGATT…	MRHKMSFPPGYRFVPTDAELLVHYLKNKNLGHPLPIDIIPECNIYKYNPDQLLCDFYNGTGNEMYFFTQRERKYEGGSRPDRKAANGYWKATGGNTKVTDGDKTVGYKMSLKFHKGKAPKGEKTDWLMEEYRIDEVDPPLITSVSQTTECGKRKRFIGSHDHGKKMSGFVLCRIHKNRWTAKKAVEASSDQSTSSRSTAFDVSEIIILNEIFPDWEEAWPITTTNIPEHRLGSLQPPMQEFWKTEWMEYRNDEVDPPLITNVSQTEHGKITKRLVGSHDDHSKKGGASVPKYFRVPDKNRDLKELEAIAMPQYSMPAIPQSCMHAITYGHHARYLDHTIAVESVDFCSGVPRVN	354	NAC domain-containing protein	-
MsNAC89	evm.model.ctg86.62	evm.TU.ctg86.62	PF02365.20	No apical meristem (NAM) protein	Chr7	-	6098749	6111509	ATGAAGGAGGCACTGGATCTACCAGCTAGCTTTTGCTTTTGTCCACGTGATGAGGAATTGATACAGGATTACCTCCGGAACAAGAATCGTGGTCTTCCACTTCCACTCGATATAATCAAGGAATATGATGTCTACAAGTTCAACCCTGACCAACTTCCATGTGATTTCAAGTATGGGAAGCAGGACGAGATGTATTTCTTCAGCACAAGGGACCGAAAATACCAAAATGGATCACGGCCGAACCGCTCGGCAGGTGATGGCTACTGGAGGGCTACAACCGCTGATCAAGCGGTTAGTGAAAGCAACAAAGTTATCGGGTACAAGTCGAGATTGGTGTTTTACAAGGGAAAACCCCCCAAAGGGAAGAAAACTAATTGGATCATGCACGAGTATAGAATC…	MKEALDLPASFCFCPRDEELIQDYLRNKNRGLPLPLDIIKEYDVYKFNPDQLPCDFKYGKQDEMYFFSTRDRKYQNGSRPNRSAGDGYWRATTADQAVSESNKVIGYKSRLVFYKGKPPKGKKTNWIMHEYRINKQDCPNGSTGDGKSMRMDGFVLCRIYELRRGSKKSTPNGENGMPVTSFVGEPATALPLPDDVIVKLEDSGAKDRYLPNLCSEPPKNPTSAPINGLGFLMTQPNHTTTVSPSKEINGDSNSNTGQEINEEDACNKRQPSLPAATRPQKRGRLSNGHALVGDINGLRLLRTPPNHTTPMSPSKENNDDSNSNSRQEINGEVAHNKCQPGLPSATRPEIRGRPSNGHALVGEISRMDMLSDQPSAPTQPPVASDHHSYATCLEELQQL…	442	NAC transcription factor 29-like	GO:0000003,GO:0003006,GO:0003674,GO:0003700,GO:0005575,GO:0005622,GO:0005623,GO:0005634,GO:0006355,GO:0007275,GO:0007568,GO:0008150,GO:0009790,GO:0009791,GO:0009793,GO:0009825,GO:0009835,GO:0009889,GO:0009908,GO:0009987,GO:0010150,GO:0010154,GO:0010468,GO:0010556,GO:0016049,GO:0019219,GO:0019222,GO:0021700,GO:0022414,GO:0031323,GO:0031326,GO:0032501,GO:0032502,GO:0040007,GO:0043226,GO:0043227,GO:…
MsNAC90	evm.model.ctg86.80	evm.TU.ctg86.80	PF02365.20	No apical meristem (NAM) protein	Chr7	+	6657473	6663048	ATGACATGGACCAAAGATTGTGGCGAGGACGGTCGCGATGGTGGAGCGATCGATGGAAAATCCGAGGAAGAAGAACATCGGATCAAAAGCTGCCCATCATGCGGCCATCGAATCCTATGCCACGAACAGGCGGCAATTCATGAACTGCCTGGGCTGCCTGCGGGAGTGAAGTTCGATCCGACGGACCAAGAGCTTCTTGAGCATTTGGAAGGAAAGGTGCGGTCTGATATTTGTAAGCTTCATCCACTCATTGATGAATTCATCCCTACACTCGAAGGAGAGAATGGGATTTGTTACACTCACCCAGAGAAGCTTCCAGGAGTGAGTAGAGACGGCCTAATCCGACACTTCTTCCATCGCCCTTCTAAGGCTTACACCACAGGAACCAGGAAGCGTAGG…	MTWTKDCGEDGRDGGAIDGKSEEEEHRIKSCPSCGHRILCHEQAAIHELPGLPAGVKFDPTDQELLEHLEGKVRSDICKLHPLIDEFIPTLEGENGICYTHPEKLPGVSRDGLIRHFFHRPSKAYTTGTRKRRKVHTDAQGGETRWHKTGKTRPVFVGGKLKGYKKILVLYTNYGKQRKPEKTNWVMHQYHLGSNEDEKDGELVVSKVFYQTQPRQCGSGTKDSKSHDGHDSIALKDTGIVDYYNPSIISYDQGTHDRVSPHQLLTNFVVHADGASFLP	279	(NAC) domain-containing protein	-
MsNAC91	evm.model.ctg86.83	evm.TU.ctg86.83	PF02365.20	No apical meristem (NAM) protein	Chr7	-	6859478	6861432	ATGAATATAATAAATGAAATACTGTTCCCACCAGGCTTCAGATTCCATCCAACGGATCAAGAACTCATCGTTCATTACTTGAGGAAGAAGGTGTCTTCTCCCCAAACTCCCCTCCCATATATCATTGCAGACATCGACCTCTACAAGTTCAATCCATGGGATCTCCCTGGCAAGGCTTTCTTTGGGGAGAGCGAGTGGTTCTTCTTCACCCCAAGAGATCGGAAATACCCAAACGGGGGCCGACCGAATAGAGCGGCTGCATCTGGCTATTGGAAAGCCACTGGTACGGATAAACCAATCCTGGTATCCGGTGGGTCACAGTGTCTCGGAGTGAAGAAAGGTCTGATCTTTTATAGAGGCCGCCCTCCGAGAGGCATCAAAACTGACTGGCTGATGCAT…	MNIINEILFPPGFRFHPTDQELIVHYLRKKVSSPQTPLPYIIADIDLYKFNPWDLPGKAFFGESEWFFFTPRDRKYPNGGRPNRAAASGYWKATGTDKPILVSGGSQCLGVKKGLIFYRGRPPRGIKTDWLMHEYRLLDNNNNNAGSQKLKGSMRLDDWVLCRVRRKNNIPLQIAENYENYQPCSVSIDNQSMEKQLARKREDFFEGIDYRVLADLMVSQDRVPHICDSTSYQGLTKVSNPNVVSHGDDNGPQPQLISSVQNIPDSISWTLSLGGLDDLVMSPPPTKRLNISGNMKEQSPTDSTSIASCFSDFIT	315	No apical meristem (NAM) protein	-
MsNAC92	evm.model.ctg88.68	evm.TU.ctg88.68	PF02365.20	No apical meristem (NAM) protein	Chr7	-	15721923	15736850	ATGAGGGCCAGCTTGGTACGGGCATACGTGAGTTCTAGTGTAATACCACTACAAAAGAACCAGTACCATAAGCTCTGCATATTTTCTTCTCCTTATGAGGCGATTTTAAGGAAAGAAAAATTGAGAGCTGGTTATTTAGTACAGAACTTTCAGTCCATTTTGGTGGTTCTTGTTGATCAAGAGATATGCAAAGATGGAAACGGGCATGTGTCTGTACCACCAGGTTTCCGATTCCATCCAACGGATGAGGAACTCCTCTACTATTACCTAAGGAAAAAGGTCGCTTACGAAGCCATTGACCTTGATGTCATCAGAGACGTTGATCTCAACAAACTCGAACCTTGGGACCTCAAAGATAAATGTAGGATCGGATCAGGCCCCCAGAATGAGTGGTATTTC…	MRASLVRAYVSSSVIPLQKNQYHKLCIFSSPYEAILRKEKLRAGYLVQNFQSILVVLVDQEICKDGNGHVSVPPGFRFHPTDEELLYYYLRKKVAYEAIDLDVIRDVDLNKLEPWDLKDKCRIGSGPQNEWYFFSHKDKKYPTGTRTNRATTAGFWKATGRDKAIHLSNAKRIGMRKTLVFYTGRAPHGQKTDWIMHEYRLDDDNSDVQEEGWVVCRVFRKKNLQRGFQPEVGLEEDQFNHFNTTEPASLNQKQHFQTHNDFGFNNSMHLPQLLSPESAVLPFLTPISLNTMDIECSQNLMKLTSGSGGGSTSGSGFLQQERFHGDWSFLDKLLASHQSLEQLCQVKVGHTSHAVEMGSSVQRFPLQYLGCEADIPKFSK	380	NAC domain-containing protein 76	GO:0003002,GO:0003674,GO:0003700,GO:0005575,GO:0005622,GO:0005623,GO:0005634,GO:0006355,GO:0007275,GO:0007389,GO:0008150,GO:0009832,GO:0009834,GO:0009889,GO:0009987,GO:0010453,GO:0010455,GO:0010468,GO:0010556,GO:0019219,GO:0019222,GO:0022622,GO:0031323,GO:0031326,GO:0032501,GO:0032502,GO:0042546,GO:0043226,GO:0043227,GO:0043229,GO:0043231,GO:0044085,GO:0044424,GO:0044464,GO:0045595,GO:0045597,GO:…
MsNAC93	evm.model.ctg90.49_evm.model.ctg90.50	evm.TU.ctg90.49_evm.TU.ctg90.50	PF02365.20	No apical meristem (NAM) protein	Chr7	+	28540272	28547255	ATGGGATTGAGGGATGTAGAGGCCACACTCCCCCCAGGATTTAGGTTCTATCCAAGTGATGAGGAATTGGTTTGCCACTATCTACGTAAAAAAGTGGCTAATGAGAGAAGCTCACACGGGACTATGGTGGTGGTGGATTTGCACACGTGTGAGCCTTGGCAGCTACCAGATGTAGCTAAACTCGGTGGGAATGAATGGTACTTCTTCAGCTTTAGGGACCGGAAATACTCCACCGGCGTGCGTGCGAATCGAGCCACGACGTCCGGATACTGGAAAGCCACCGGAAAAGATAGGCCGGTGATCGATCCGACCATACAGGAGGTGGCCGGCATGCGAAAGACTCTGGTTTTCTACCGTGAAAGAGCTCCAAACGGGATAAAGACGGATTGGGTCATGCAC…	MGLRDVEATLPPGFRFYPSDEELVCHYLRKKVANERSSHGTMVVVDLHTCEPWQLPDVAKLGGNEWYFFSFRDRKYSTGVRANRATTSGYWKATGKDRPVIDPTIQEVAGMRKTLVFYRERAPNGIKTDWVMHEFRLESPHAPPKEDWVLCRVFHKSKGEPSKFSLENENDNIGCSSPYMESSPPSIGQSILHGYDQDQNRSFINGPHYDQDQSTLLNSSVLPFNFLDFPHGMDDTQPIMGTSDRGVDDYGFLLDMSPIYQNLGVGGSQNSEEEGLIGNVKNKGLL	286	No apical meristem protein	GO:0000003,GO:0003006,GO:0003674,GO:0003700,GO:0005575,GO:0005622,GO:0005623,GO:0005634,GO:0006355,GO:0007154,GO:0007165,GO:0007275,GO:0008150,GO:0009653,GO:0009719,GO:0009725,GO:0009733,GO:0009734,GO:0009755,GO:0009790,GO:0009791,GO:0009793,GO:0009888,GO:0009889,GO:0009933,GO:0009987,GO:0010014,GO:0010016,GO:0010033,GO:0010072,GO:0010154,GO:0010468,GO:0010556,GO:0019219,GO:0019222,GO:0022414,GO:…
MsNAC94	evm.model.ctg92.505	evm.TU.ctg92.505	PF02365.20	No apical meristem (NAM) protein	Chr7	+	70357494	70432353	ATGGCAAGGACATGGCTGGTTGATGGTAGGGCAATTGCAAGGAAAGTAAAGAATGCCACTCAGTTTTCTACGTATCAGAACAAGGACTGGGCTGTAGAAGCACATCGACATTGCCCCAATTGCAATCATCGTATTGATAACAGTGATGTTTCACTAGAATGGCCTGGACTACCTTCAGGTGTAAAATTCGATCCATCCGATGTGGAGCTTTTAGAACATTTAGCAGGAAAAGTTGGGCTGGGAAATTCAAAGCCTCATTTGTTTATTGATGAATTCATTCCAACATTGGAGGAGGAGGACGGAATTTGCTATAGGCATCCTGAAAATCTTCCTGGTATCAAGAAAGATGGAAGCAGCGTCCATTTCTTTCATAGAACATCCAATGCATATGCAACAGGT…	MARTWLVDGRAIARKVKNATQFSTYQNKDWAVEAHRHCPNCNHRIDNSDVSLEWPGLPSGVKFDPSDVELLEHLAGKVGLGNSKPHLFIDEFIPTLEEEDGICYRHPENLPGIKKDGSSVHFFHRTSNAYATGQRKRRKIHPQCCLFEERVRWHKTGKTRPIIENGVRKGCKKIMVLYKSLKKGSKPHKDNWVMHQYHLGTEEDEREGEFVVSKIFYQQQSKHVTEKSNVDVFKKESDMVAARVSPRTPKTNTPHPPRPGKHALYEVGKEKMQHLSYQDAEFISEMPQPSGAIRLEDESANITWWAGESQGVEETHLDDADDSLLCNEILDFQLPFEESELKHVPYFPEVGCSRMNTHERETKPVCGSLDLDNIEVDTPPDFQLADLQFGSQESIMSWL…	402	(NAC) domain-containing protein	-
MsNAC95	evm.model.ctg97.89.2	evm.TU.ctg97.89	PF02365.20	No apical meristem (NAM) protein	Chr7	-	115192711	115195438	ATGGAGAAGGAGAGTTTTGTGAAGAATGGAGAGTTGAGATTGCCTCCTGGGTTCAGATTCCATCCAACCGACGAAGAGCTCGTCGTTCAGTACCTGAAGCGGAAGGTGTTTTCCTGCCCTTTGCCTGCTTTGATTATTCCTGAGCTCGATGCGTACAAATCCGATCCTTGGGATTTGCCAGGTGATTACAAGAGAGAGAGATACTTCTTCACTACAAGAGAAGCGAAATATCTTAATGGGAATCGGCACAAGAGAGCAACTGGTTCGGGATACTGGAAGGGCATCGGCGCAGACAAGCCAATTGTAGCTGCCAGAAGCAACCAAGTAGTGGGGATGAAGAAGATTCTTGTTTTCTACGGAGGAAAGCCTCCAAAGGGGACTAGAACTGATTGGATCATG…	MEKESFVKNGELRLPPGFRFHPTDEELVVQYLKRKVFSCPLPALIIPELDAYKSDPWDLPGDYKRERYFFTTREAKYLNGNRHKRATGSGYWKGIGADKPIVAARSNQVVGMKKILVFYGGKPPKGTRTDWIMHEYRLSDAAGSRSCVFPQRKNSTQVSFRLYLYCSYKILQPFHNFMPSIFFLMQNFMMQTEDWVLCRMFLKKRSTRNDTEIVETCNKSDAKNFGVARNNRIDFMIKQTKSSVSPSSSSSSSSNLSSITELTVESQDEENTS	273	NAC transcription factor	-
MsNAC96	evm.model.ctg99.81	evm.TU.ctg99.81	PF02365.20	No apical meristem (NAM) protein	Chr8	-	1576849	1611770	ATGGATGAGAAGGGTGATGTGGATAAGGTAGATGAAGTGATGCTGCCTGGGTTCCGATTTCATCCTACAGATGAGGAGCTTGTCGGGTTCTATCTGAAGAGGAAGGTTCAACAGAGGCCTCTGTCTATTGAGCTTATTAGGCAACTGGATATCTACAAGTTCGATCCATGGGATCTTCCAAAAGAGCTGGCGACCACTGGGGAGAAGGAATGGTATTTCTACTGTCCAAGGGACAGGAAGTATCGGAACAGCGCGAGGCCTAACAGAGTCACAGGAGCTGGGTTTTGGAAAGCGACCGGAACGGACAGACCTATCTACTCCTCTGAAGGAACCAAGTGCATAGGCCTGAAGAAATCACTCGTGTTCTACAAAGGAAGAGCTGCCAAAGGGATAAAAACC…	MDEKGDVDKVDEVMLPGFRFHPTDEELVGFYLKRKVQQRPLSIELIRQLDIYKFDPWDLPKELATTGEKEWYFYCPRDRKYRNSARPNRVTGAGFWKATGTDRPIYSSEGTKCIGLKKSLVFYKGRAAKGIKTDWMMHEFRLPSIIDSSMNKRPVDKNLPANDSWAICRIFKKTNSMAQRALSQSWVSPLPETTSSDIFSYTGHGTQFTSENISCTTEAGSAIQFCGNSDLHQSNANFSLLDIPSYKPINPTVYKPAPLPILTTEIPPAFMFAPVDMPVPTKCHVDVASVLLNLSPSILGDAGKGSASIDFGSQQQCNSFTVNLQQEELSTEREMEEAKAVKLHGMWASPFSMRIEMALKLKGIPYEQVEEDLGNKSQLLLQYNPVHKMVPVLVHDGRS…	801	(NAC) domain-containing protein	GO:0003674,GO:0003700,GO:0005575,GO:0005622,GO:0005623,GO:0005634,GO:0006355,GO:0007275,GO:0008150,GO:0009719,GO:0009725,GO:0009733,GO:0009786,GO:0009889,GO:0009987,GO:0010033,GO:0010468,GO:0010556,GO:0017145,GO:0019219,GO:0019222,GO:0022622,GO:0031323,GO:0031326,GO:0032501,GO:0032502,GO:0042221,GO:0043226,GO:0043227,GO:0043229,GO:0043231,GO:0044424,GO:0044464,GO:0045770,GO:0048103,GO:0048364,GO:…

## Sheet: Table5
Table S5 Physicochemical properties of the NAC proteins in M. sinostellata.
name	Protein Length (aa)	Molecular Weight (kDa)	Grand Average of Hydropathicity	Isoelectric Point	Aliphatic index	instability index	CELLO Prediction	value
MsNAC1	195	22315.9	-0.617	5.01	63.44	37.294	Extracellular/OuterMembrane	1.859/1.555
MsNAC2	367	41542.3	-0.705	6.28	60.6	57.784	Extracellular	3.25
MsNAC3	361	41409.2	-0.895	6.92	59.36	41.325	Extracellular	2.233
MsNAC4	573	64888	-0.578	5.28	68.88	42.806	Cytoplasmic	2.929
MsNAC5	268	31465	-0.759	7.61	67.99	45.765	Cytoplasmic	3.866
MsNAC6	381	42984.6	-0.871	5.31	61.73	41.454	Extracellular	2.426
MsNAC7	378	42799.8	-0.818	4.99	63.39	56.026	Cytoplasmic/Periplasmic	2.015/1.923
MsNAC8	322	36820.6	-0.629	6.12	69.1	34.608	Cytoplasmic/Periplasmic/Extracellular	1.634/1.412/1.062
MsNAC9	337	38193.9	-0.681	8.46	66.35	43.324	Extracellular	2.411
MsNAC10	356	40048.2	-0.574	5.95	66.26	33.603	Periplasmic/Extracellular	2.037/1.582
MsNAC11	228	25310	0.021	7.65	88.9	28.387	OuterMembrane/InnerMembrane/Extracellular	1.774/1.120/1.088
MsNAC12	251	29682.7	-0.876	7.67	63.71	52.363	Periplasmic/Cytoplasmic/Extracellular	1.566/1.502/1.015
MsNAC13	313	35175.8	-0.672	8.88	56.39	27.561	Extracellular/Periplasmic	2.588/1.962
MsNAC14	345	39203	-0.717	8.93	65.01	38.524	OuterMembrane/Extracellular	2.092/1.913
MsNAC15	408	45730.4	-0.611	5.96	61.91	34.779	Extracellular	2.813
MsNAC16	302	34691.2	-0.725	5.86	66.23	33.51	Cytoplasmic/Periplasmic/Extracellular	1.812/1.743/1.254
MsNAC17	363	40240.9	-0.651	5.04	65.56	53.719	Periplasmic/Extracellular/OuterMembrane	1.734/1.660/1.144
MsNAC18	355	39438.8	-0.664	4.63	65.07	45.01	Extracellular	2.313
MsNAC19	372	41766.7	-0.745	5.45	62.34	47.986	Extracellular/Periplasmic	1.601/1.448
MsNAC20	268	31051.3	-0.643	5.45	67.65	51.313	Cytoplasmic/Periplasmic	2.174/2.143
MsNAC21	228	26258.8	-0.674	5.89	56.89	53.583	Periplasmic/Cytoplasmic	2.118/1.618
MsNAC22	101	11456.2	-0.167	6.49	87.82	61.327	Cytoplasmic/Periplasmic	2.138/1.557
MsNAC23	194	22584.5	-0.998	8.27	58.35	28.165	Periplasmic	2.733
MsNAC24	539	60641.1	-0.875	5.62	61.71	36.643	Periplasmic	2.436
MsNAC25	257	29584.7	-0.937	9	59.49	30.155	Periplasmic	3.274
MsNAC26	375	42881.3	-0.977	5.12	63.97	40.172	Extracellular	2.173
MsNAC27	390	44926.4	-0.926	4.96	59.72	41.534	OuterMembrane/Extracellular	2.164/2.129
MsNAC28	342	38435.3	-0.728	8.33	65.06	40.043	Extracellular/Periplasmic	2.468/1.950
MsNAC29	354	40743.5	-0.712	4.84	57.26	49.04	Extracellular/Periplasmic	1.918/1.878
MsNAC30	294	33869.2	-0.687	8.75	62.31	36.68	OuterMembrane	2.099
MsNAC31	312	35228.4	-0.349	6.33	75.58	39.945	Periplasmic	2.186
MsNAC32	640	71113	-0.502	4.68	72.48	34.555	Cytoplasmic	2.315
MsNAC33	160	18597.6	-0.454	5.94	86.44	51.506	Cytoplasmic	3.624
MsNAC34	388	43561.6	-0.488	9.1	65.88	41.824	Extracellular	2.255
MsNAC35	303	33559.7	-0.356	4.7	81.16	43.72	Cytoplasmic	4.118
MsNAC36	425	49028.7	-0.725	9.53	62.21	49.974	Cytoplasmic	3.147
MsNAC37	258	29425	-0.572	5.19	61.16	59.776	Extracellular	2.536
MsNAC38	233	26642	-0.825	8.51	60.26	37.475	Cytoplasmic/Extracellular	1.984/1.526
MsNAC39	401	46024.7	-0.607	8.88	64.89	36.768	OuterMembrane/Extracellular	2.361/1.921
MsNAC40	247	27763	-0.641	6.54	67.85	51.648	OuterMembrane	2.538
MsNAC41	247	28352.9	-0.687	7.72	66.28	53.696	OuterMembrane/Cytoplasmic/Extracellular	1.473/1.303/1.150
MsNAC42	178	19678.8	-0.856	8.43	56.97	49	Extracellular	2.165
MsNAC43	246	27804.2	-0.635	6.24	64.96	54.091	OuterMembrane	2.009
MsNAC44	416	46998.2	-0.683	7.64	73.05	47.078	Cytoplasmic	3.429
MsNAC45	375	43825.6	-1.053	6.84	61.09	47.868	OuterMembrane/Extracellular	1.994/1.566
MsNAC46	580	63896.2	-0.425	4.8	68.76	44.74	OuterMembrane/Extracellular	1.943/1.703
MsNAC47	360	40768	-0.537	5.57	67.97	55.471	Extracellular	2.022
MsNAC48	354	41145	-0.831	6.11	63.62	55.528	Extracellular	2.003
MsNAC49	415	46973.1	-0.815	6.24	58.05	46.53	Extracellular	3.079
MsNAC50	680	74544.3	-0.734	5.22	59.69	45.874	Extracellular	2.63
MsNAC51	154	18193.7	-0.773	9.21	67.79	34.784	Cytoplasmic	2.93
MsNAC52	190	22299.3	-0.732	5.79	74.89	50.456	Cytoplasmic	2.91
MsNAC53	381	42815.1	-0.538	4.92	61.1	48.158	Extracellular	2.986
MsNAC54	310	34694.2	-0.468	5.52	65.16	50.488	Periplasmic	2.128
MsNAC55	426	47964.4	-0.953	6.36	55.85	51.325	Extracellular/Periplasmic/Cytoplasmic	1.851/1.507/1.243
MsNAC56	357	40342.2	-0.64	4.43	62.83	36.741	Cytoplasmic	2.238
MsNAC57	155	17634	-0.775	9.26	54.71	23.602	Periplasmic/Extracellular	1.897/1.244
MsNAC58	427	48609.4	-0.593	8.72	74.87	37.349	Cytoplasmic	2.614
MsNAC59	217	24670.1	-0.535	9.4	61.57	14.548	Extracellular/OuterMembrane	1.950/1.556
MsNAC60	445	51738.6	-0.524	9.58	72.79	38.079	Cytoplasmic	2.147
MsNAC61	316	36210.1	-0.522	5.21	65.95	39.908	Periplasmic	1.943
MsNAC62	344	38225	-0.69	8.89	65.76	36.157	Extracellular/Periplasmic	2.552/1.860
MsNAC63	328	37305	-0.597	6.72	67.13	41.925	Extracellular/OuterMembrane/Periplasmic	1.887/1.511/1.294
MsNAC64	700	78949.5	-0.829	8.79	67.11	41.888	Extracellular/Periplasmic/OuterMembrane	1.502/1.262/1.224
MsNAC65	275	31586.8	-0.72	7.7	62.73	35.983	Extracellular/Periplasmic	2.066/1.649
MsNAC66	380	42560.3	-0.575	8.38	63.68	40.299	Extracellular	2.443
MsNAC67	400	45329.3	-0.625	8.62	61.7	47.568	Extracellular	2.34
MsNAC68	551	60373.8	-0.372	5.3	72.94	36.721	Periplasmic/Cytoplasmic/Extracellular	1.679/1.503/1.106
MsNAC69	190	21719.5	-0.51	5.48	72.84	37.031	Cytoplasmic	3.459
MsNAC70	301	34651.3	-0.769	8.1	59.34	43.382	Periplasmic	4.102
MsNAC71	358	40500.3	-0.738	6.64	66.51	55.57	OuterMembrane/Extracellular	1.835/1.790
MsNAC72	411	46524.7	-0.775	6.16	63.38	46.746	Extracellular	2.948
MsNAC73	236	27044.3	-0.717	4.98	57.88	47.54	Cytoplasmic	2.98
MsNAC74	695	79655.3	-0.584	5.28	67.87	48.607	Cytoplasmic	2.308
MsNAC75	235	27262.1	-0.651	6.41	81.7	57.948	Cytoplasmic	4.425
MsNAC76	155	17418.8	-0.67	9.35	61.74	17.129	Cytoplasmic	2.224
MsNAC77	317	36317.4	-0.77	5.78	60	52.058	Periplasmic	2.182
MsNAC78	319	36034.1	-0.704	7.12	57.21	28.651	Extracellular	3.71
MsNAC79	85	9854.19	-0.142	4.56	89.53	41.358	Cytoplasmic	3.497
MsNAC80	301	34554.1	-0.6	6.89	69.3	36.866	Cytoplasmic	3.107
MsNAC81	344	38278.1	-0.555	8.78	62.12	51.214	Extracellular/OuterMembrane	2.027/1.448
MsNAC82	269	30652.6	-0.774	6.97	68.74	44.445	Cytoplasmic/Periplasmic	2.097/1.962
MsNAC83	314	34915.3	-0.533	10.01	66.75	38.721	Periplasmic	3.258
MsNAC84	290	32836.1	-0.565	6.33	70.28	39.015	Extracellular/Periplasmic	1.984/1.303
MsNAC85	211	23693.8	-0.605	8.65	71.18	38.531	Extracellular/Periplasmic	1.987/1.576
MsNAC86	257	29008.7	-0.693	9.65	59.11	48.451	OuterMembrane/Extracellular	1.861/1.666
MsNAC87	338	37361	-0.54	8.71	56.86	46.323	Extracellular	3.041
MsNAC88	354	40544	-0.743	8.36	62.51	49.027	Periplasmic/Cytoplasmic	2.049/2.034
MsNAC89	442	49251.4	-0.824	8.4	64.43	47.356	Periplasmic	2.8
MsNAC90	279	31378.2	-0.813	7.3	66.34	33.241	Periplasmic/Cytoplasmic	2.189/1.830
MsNAC91	315	35665.4	-0.546	8.49	75.49	45.801	Extracellular	2.193
MsNAC92	380	43457.2	-0.542	8.34	74.37	37.818	OuterMembrane/Cytoplasmic	1.893/1.366
MsNAC93	286	32346.2	-0.642	5.49	65.03	51.378	Extracellular	2.2
MsNAC94	402	46158.9	-0.782	6.07	66.17	41.8	Cytoplasmic	3.522
MsNAC95	273	31478.9	-0.59	9.45	64.25	47.337	OuterMembrane/Periplasmic	1.865/1.201
MsNAC96	801	90893.4	-0.305	5.89	85.33	43.859	Cytoplasmic	3.632

## Sheet: Table6
Table S6 Detailed annotation of cis-acting regulatory elements in the promoters of MsNAC genes.
Gene_id	element	Seq	Length	Seq_Length	Strand	Species	Description	Type
MsNAC1	TCA-element	CCATCTTTTT	1177	9	-	Nicotiana tabacum	cis-acting element involved in salicylic acid responsiveness	salicylic acid response
MsNAC13	TCA-element	CCATCTTTTT	1050	9	+	Nicotiana tabacum	cis-acting element involved in salicylic acid responsiveness	salicylic acid response
MsNAC16	TCA-element	CCATCTTTTT	297	9	+	Nicotiana tabacum	cis-acting element involved in salicylic acid responsiveness	salicylic acid response
MsNAC21	TCA-element	CCATCTTTTT	100	9	+	Nicotiana tabacum	cis-acting element involved in salicylic acid responsiveness	salicylic acid response
MsNAC24	TCA-element	TCAGAAGAGG	573	9	-	Brassica oleracea	cis-acting element involved in salicylic acid responsiveness	salicylic acid response
MsNAC24	TCA-element	TCAGAAGAGG	1899	9	+	Brassica oleracea	cis-acting element involved in salicylic acid responsiveness	salicylic acid response
MsNAC25	TCA-element	TCAGAAGAGG	1964	9	-	Brassica oleracea	cis-acting element involved in salicylic acid responsiveness	salicylic acid response
MsNAC28	TCA-element	CCATCTTTTT	952	9	-	Nicotiana tabacum	cis-acting element involved in salicylic acid responsiveness	salicylic acid response
MsNAC28	SARE	TTCGACCATCTT	325	11	-	Nicotiana tabacum	cis-acting element involved in salicylic acid responsiveness	salicylic acid response
MsNAC34	TCA-element	CCATCTTTTT	1909	9	-	Nicotiana tabacum	cis-acting element involved in salicylic acid responsiveness	salicylic acid response
MsNAC37	TCA-element	CCATCTTTTT	418	9	+	Nicotiana tabacum	cis-acting element involved in salicylic acid responsiveness	salicylic acid response
MsNAC39	TCA-element	CCATCTTTTT	590	9	-	Nicotiana tabacum	cis-acting element involved in salicylic acid responsiveness	salicylic acid response
MsNAC39	TCA-element	CCATCTTTTT	907	9	-	Nicotiana tabacum	cis-acting element involved in salicylic acid responsiveness	salicylic acid response
MsNAC39	TCA-element	TCAGAAGAGG	1823	9	+	Brassica oleracea	cis-acting element involved in salicylic acid responsiveness	salicylic acid response
MsNAC4	TCA-element	CCATCTTTTT	1365	9	-	Nicotiana tabacum	cis-acting element involved in salicylic acid responsiveness	salicylic acid response
MsNAC4	TCA-element	CCATCTTTTT	1885	9	-	Nicotiana tabacum	cis-acting element involved in salicylic acid responsiveness	salicylic acid response
MsNAC4	TCA-element	CCATCTTTTT	1901	9	+	Nicotiana tabacum	cis-acting element involved in salicylic acid responsiveness	salicylic acid response
MsNAC42	TCA-element	CCATCTTTTT	695	9	+	Nicotiana tabacum	cis-acting element involved in salicylic acid responsiveness	salicylic acid response
MsNAC42	TCA-element	CCATCTTTTT	1224	9	-	Nicotiana tabacum	cis-acting element involved in salicylic acid responsiveness	salicylic acid response
MsNAC44	TCA-element	CCATCTTTTT	301	9	-	Nicotiana tabacum	cis-acting element involved in salicylic acid responsiveness	salicylic acid response
MsNAC44	TCA-element	TCAGAAGAGG	345	9	+	Brassica oleracea	cis-acting element involved in salicylic acid responsiveness	salicylic acid response
MsNAC47	TCA-element	CCATCTTTTT	98	9	+	Nicotiana tabacum	cis-acting element involved in salicylic acid responsiveness	salicylic acid response
MsNAC48	TCA-element	CCATCTTTTT	346	9	-	Nicotiana tabacum	cis-acting element involved in salicylic acid responsiveness	salicylic acid response
MsNAC49	TCA-element	CCATCTTTTT	25	9	-	Nicotiana tabacum	cis-acting element involved in salicylic acid responsiveness	salicylic acid response
MsNAC51	TCA-element	CCATCTTTTT	514	9	-	Nicotiana tabacum	cis-acting element involved in salicylic acid responsiveness	salicylic acid response
MsNAC54	TCA-element	CCATCTTTTT	1778	9	-	Nicotiana tabacum	cis-acting element involved in salicylic acid responsiveness	salicylic acid response
MsNAC55	TCA-element	CCATCTTTTT	234	9	-	Nicotiana tabacum	cis-acting element involved in salicylic acid responsiveness	salicylic acid response
MsNAC56	TCA-element	TCAGAAGAGG	179	9	+	Brassica oleracea	cis-acting element involved in salicylic acid responsiveness	salicylic acid response
MsNAC58	TCA-element	CCATCTTTTT	945	9	+	Nicotiana tabacum	cis-acting element involved in salicylic acid responsiveness	salicylic acid response
MsNAC59	TCA-element	CCATCTTTTT	1019	9	+	Nicotiana tabacum	cis-acting element involved in salicylic acid responsiveness	salicylic acid response
MsNAC59	TCA-element	CCATCTTTTT	1178	9	+	Nicotiana tabacum	cis-acting element involved in salicylic acid responsiveness	salicylic acid response
MsNAC59	TCA-element	CCATCTTTTT	1583	9	+	Nicotiana tabacum	cis-acting element involved in salicylic acid responsiveness	salicylic acid response
MsNAC6	TCA-element	CCATCTTTTT	237	9	+	Nicotiana tabacum	cis-acting element involved in salicylic acid responsiveness	salicylic acid response
MsNAC6	TCA-element	CCATCTTTTT	428	9	+	Nicotiana tabacum	cis-acting element involved in salicylic acid responsiveness	salicylic acid response
MsNAC62	TCA-element	TCAGAAGAGG	344	9	-	Brassica oleracea	cis-acting element involved in salicylic acid responsiveness	salicylic acid response
MsNAC62	TCA-element	CCATCTTTTT	867	9	+	Nicotiana tabacum	cis-acting element involved in salicylic acid responsiveness	salicylic acid response
MsNAC62	TCA-element	CCATCTTTTT	1776	9	-	Nicotiana tabacum	cis-acting element involved in salicylic acid responsiveness	salicylic acid response
MsNAC62	TCA-element	TCAGAAGAGG	1926	9	+	Brassica oleracea	cis-acting element involved in salicylic acid responsiveness	salicylic acid response
MsNAC63	TCA-element	CCATCTTTTT	1771	9	+	Nicotiana tabacum	cis-acting element involved in salicylic acid responsiveness	salicylic acid response
MsNAC65	TCA-element	TCAGAAGAGG	311	9	+	Brassica oleracea	cis-acting element involved in salicylic acid responsiveness	salicylic acid response
MsNAC67	TCA-element	CCATCTTTTT	774	9	-	Nicotiana tabacum	cis-acting element involved in salicylic acid responsiveness	salicylic acid response
MsNAC71	TCA-element	CCATCTTTTT	1264	9	-	Nicotiana tabacum	cis-acting element involved in salicylic acid responsiveness	salicylic acid response
MsNAC72	TCA-element	CCATCTTTTT	51	9	-	Nicotiana tabacum	cis-acting element involved in salicylic acid responsiveness	salicylic acid response
MsNAC72	TCA-element	CCATCTTTTT	79	9	-	Nicotiana tabacum	cis-acting element involved in salicylic acid responsiveness	salicylic acid response
MsNAC74	TCA-element	CCATCTTTTT	28	9	-	Nicotiana tabacum	cis-acting element involved in salicylic acid responsiveness	salicylic acid response
MsNAC74	TCA-element	CCATCTTTTT	1510	9	+	Nicotiana tabacum	cis-acting element involved in salicylic acid responsiveness	salicylic acid response
MsNAC77	TCA-element	CCATCTTTTT	1851	9	-	Nicotiana tabacum	cis-acting element involved in salicylic acid responsiveness	salicylic acid response
MsNAC79	TCA-element	TCAGAAGAGG	724	9	-	Brassica oleracea	cis-acting element involved in salicylic acid responsiveness	salicylic acid response
MsNAC80	TCA-element	TCAGAAGAGG	510	9	-	Brassica oleracea	cis-acting element involved in salicylic acid responsiveness	salicylic acid response
MsNAC80	TCA-element	CCATCTTTTT	885	10	-	Nicotiana tabacum	cis-acting element involved in salicylic acid responsiveness	salicylic acid response
MsNAC80	TCA-element	CCATCTTTTT	972	9	-	Nicotiana tabacum	cis-acting element involved in salicylic acid responsiveness	salicylic acid response
MsNAC80	TCA-element	TCAGAAGAGG	1670	9	-	Brassica oleracea	cis-acting element involved in salicylic acid responsiveness	salicylic acid response
MsNAC80	TCA-element	CCATCTTTTT	1752	9	+	Nicotiana tabacum	cis-acting element involved in salicylic acid responsiveness	salicylic acid response
MsNAC87	TCA-element	TCAGAAGAGG	355	9	-	Brassica oleracea	cis-acting element involved in salicylic acid responsiveness	salicylic acid response
MsNAC88	TCA-element	CCATCTTTTT	164	9	-	Nicotiana tabacum	cis-acting element involved in salicylic acid responsiveness	salicylic acid response
MsNAC9	TCA-element	CCATCTTTTT	1600	9	+	Nicotiana tabacum	cis-acting element involved in salicylic acid responsiveness	salicylic acid response
MsNAC90	TCA-element	CCATCTTTTT	1275	9	+	Nicotiana tabacum	cis-acting element involved in salicylic acid responsiveness	salicylic acid response
MsNAC91	TCA-element	CCATCTTTTT	77	9	-	Nicotiana tabacum	cis-acting element involved in salicylic acid responsiveness	salicylic acid response
MsNAC91	TCA-element	CCATCTTTTT	113	9	+	Nicotiana tabacum	cis-acting element involved in salicylic acid responsiveness	salicylic acid response
MsNAC93	TCA-element	CCATCTTTTT	391	9	-	Nicotiana tabacum	cis-acting element involved in salicylic acid responsiveness	salicylic acid response
MsNAC93	TCA-element	TCAGAAGAGG	570	9	-	Brassica oleracea	cis-acting element involved in salicylic acid responsiveness	salicylic acid response
MsNAC96	TCA-element	CCATCTTTTT	1225	9	+	Nicotiana tabacum	cis-acting element involved in salicylic acid responsiveness	salicylic acid response
MsNAC13	CCAAT-box	CAACGG	737	6	+	Hordeum vulgare	MYBHv1 binding site	MYBHv1 binding site
MsNAC13	CCAAT-box	CAACGG	1636	6	+	Hordeum vulgare	MYBHv1 binding site	MYBHv1 binding site
MsNAC16	CCAAT-box	CAACGG	170	6	+	Hordeum vulgare	MYBHv1 binding site	MYBHv1 binding site
MsNAC16	CCAAT-box	CAACGG	1212	6	+	Hordeum vulgare	MYBHv1 binding site	MYBHv1 binding site
MsNAC16	CCAAT-box	CAACGG	1558	6	-	Hordeum vulgare	MYBHv1 binding site	MYBHv1 binding site
MsNAC17	CCAAT-box	CAACGG	1665	6	+	Hordeum vulgare	MYBHv1 binding site	MYBHv1 binding site
MsNAC19	CCAAT-box	CAACGG	931	6	+	Hordeum vulgare	MYBHv1 binding site	MYBHv1 binding site
MsNAC19	CCAAT-box	CAACGG	1412	6	-	Hordeum vulgare	MYBHv1 binding site	MYBHv1 binding site
MsNAC20	CCAAT-box	CAACGG	515	6	-	Hordeum vulgare	MYBHv1 binding site	MYBHv1 binding site
MsNAC20	CCAAT-box	CAACGG	1207	6	-	Hordeum vulgare	MYBHv1 binding site	MYBHv1 binding site
MsNAC20	CCAAT-box	CAACGG	1949	6	-	Hordeum vulgare	MYBHv1 binding site	MYBHv1 binding site
MsNAC21	CCAAT-box	CAACGG	1194	6	+	Hordeum vulgare	MYBHv1 binding site	MYBHv1 binding site
MsNAC21	CCAAT-box	CAACGG	1213	6	-	Hordeum vulgare	MYBHv1 binding site	MYBHv1 binding site
MsNAC21	CCAAT-box	CAACGG	1588	6	+	Hordeum vulgare	MYBHv1 binding site	MYBHv1 binding site
MsNAC22	CCAAT-box	CAACGG	63	6	-	Hordeum vulgare	MYBHv1 binding site	MYBHv1 binding site
MsNAC22	CCAAT-box	CAACGG	83	6	+	Hordeum vulgare	MYBHv1 binding site	MYBHv1 binding site
MsNAC22	CCAAT-box	CAACGG	454	6	-	Hordeum vulgare	MYBHv1 binding site	MYBHv1 binding site
MsNAC22	CCAAT-box	CAACGG	882	6	-	Hordeum vulgare	MYBHv1 binding site	MYBHv1 binding site
MsNAC22	CCAAT-box	CAACGG	1041	6	-	Hordeum vulgare	MYBHv1 binding site	MYBHv1 binding site
MsNAC22	CCAAT-box	CAACGG	1489	6	+	Hordeum vulgare	MYBHv1 binding site	MYBHv1 binding site
MsNAC26	CCAAT-box	CAACGG	1033	6	+	Hordeum vulgare	MYBHv1 binding site	MYBHv1 binding site
MsNAC27	CCAAT-box	CAACGG	61	6	+	Hordeum vulgare	MYBHv1 binding site	MYBHv1 binding site
MsNAC27	CCAAT-box	CAACGG	1172	6	+	Hordeum vulgare	MYBHv1 binding site	MYBHv1 binding site
MsNAC28	CCAAT-box	CAACGG	379	6	-	Hordeum vulgare	MYBHv1 binding site	MYBHv1 binding site
MsNAC28	CCAAT-box	CAACGG	429	6	-	Hordeum vulgare	MYBHv1 binding site	MYBHv1 binding site
MsNAC28	CCAAT-box	CAACGG	1294	6	-	Hordeum vulgare	MYBHv1 binding site	MYBHv1 binding site
MsNAC28	CCAAT-box	CAACGG	1438	6	+	Hordeum vulgare	MYBHv1 binding site	MYBHv1 binding site
MsNAC28	CCAAT-box	CAACGG	1626	6	-	Hordeum vulgare	MYBHv1 binding site	MYBHv1 binding site
MsNAC29	CCAAT-box	CAACGG	1059	6	-	Hordeum vulgare	MYBHv1 binding site	MYBHv1 binding site
MsNAC3	CCAAT-box	CAACGG	852	6	-	Hordeum vulgare	MYBHv1 binding site	MYBHv1 binding site
MsNAC31	CCAAT-box	CAACGG	1088	6	+	Hordeum vulgare	MYBHv1 binding site	MYBHv1 binding site
MsNAC33	CCAAT-box	CAACGG	1404	6	-	Hordeum vulgare	MYBHv1 binding site	MYBHv1 binding site
MsNAC33	CCAAT-box	CAACGG	1539	6	+	Hordeum vulgare	MYBHv1 binding site	MYBHv1 binding site
MsNAC38	CCAAT-box	CAACGG	279	6	+	Hordeum vulgare	MYBHv1 binding site	MYBHv1 binding site
MsNAC39	CCAAT-box	CAACGG	644	6	-	Hordeum vulgare	MYBHv1 binding site	MYBHv1 binding site
MsNAC39	CCAAT-box	CAACGG	781	6	+	Hordeum vulgare	MYBHv1 binding site	MYBHv1 binding site
MsNAC4	CCAAT-box	CAACGG	989	6	+	Hordeum vulgare	MYBHv1 binding site	MYBHv1 binding site
MsNAC41	CCAAT-box	CAACGG	11	6	-	Hordeum vulgare	MYBHv1 binding site	MYBHv1 binding site
MsNAC42	CCAAT-box	CAACGG	15	6	-	Hordeum vulgare	MYBHv1 binding site	MYBHv1 binding site
MsNAC44	CCAAT-box	CAACGG	1751	6	+	Hordeum vulgare	MYBHv1 binding site	MYBHv1 binding site
MsNAC45	CCAAT-box	CAACGG	686	6	+	Hordeum vulgare	MYBHv1 binding site	MYBHv1 binding site
MsNAC47	CCAAT-box	CAACGG	341	6	+	Hordeum vulgare	MYBHv1 binding site	MYBHv1 binding site
MsNAC47	CCAAT-box	CAACGG	691	6	-	Hordeum vulgare	MYBHv1 binding site	MYBHv1 binding site
MsNAC47	CCAAT-box	CAACGG	1843	6	+	Hordeum vulgare	MYBHv1 binding site	MYBHv1 binding site
MsNAC48	CCAAT-box	CAACGG	1381	6	-	Hordeum vulgare	MYBHv1 binding site	MYBHv1 binding site
MsNAC48	CCAAT-box	CAACGG	1664	6	+	Hordeum vulgare	MYBHv1 binding site	MYBHv1 binding site
MsNAC5	CCAAT-box	CAACGG	168	6	-	Hordeum vulgare	MYBHv1 binding site	MYBHv1 binding site
MsNAC5	CCAAT-box	CAACGG	1239	6	+	Hordeum vulgare	MYBHv1 binding site	MYBHv1 binding site
MsNAC53	CCAAT-box	CAACGG	249	6	+	Hordeum vulgare	MYBHv1 binding site	MYBHv1 binding site
MsNAC53	CCAAT-box	CAACGG	629	6	+	Hordeum vulgare	MYBHv1 binding site	MYBHv1 binding site
MsNAC53	CCAAT-box	CAACGG	702	6	-	Hordeum vulgare	MYBHv1 binding site	MYBHv1 binding site
MsNAC54	CCAAT-box	CAACGG	1848	6	+	Hordeum vulgare	MYBHv1 binding site	MYBHv1 binding site
MsNAC55	CCAAT-box	CAACGG	813	6	+	Hordeum vulgare	MYBHv1 binding site	MYBHv1 binding site
MsNAC55	CCAAT-box	CAACGG	1370	6	+	Hordeum vulgare	MYBHv1 binding site	MYBHv1 binding site
MsNAC57	CCAAT-box	CAACGG	33	6	-	Hordeum vulgare	MYBHv1 binding site	MYBHv1 binding site
MsNAC58	CCAAT-box	CAACGG	1052	6	-	Hordeum vulgare	MYBHv1 binding site	MYBHv1 binding site
MsNAC6	CCAAT-box	CAACGG	1654	6	+	Hordeum vulgare	MYBHv1 binding site	MYBHv1 binding site
MsNAC60	CCAAT-box	CAACGG	1379	6	-	Hordeum vulgare	MYBHv1 binding site	MYBHv1 binding site
MsNAC61	CCAAT-box	CAACGG	1837	6	+	Hordeum vulgare	MYBHv1 binding site	MYBHv1 binding site
MsNAC62	CCAAT-box	CAACGG	128	6	-	Hordeum vulgare	MYBHv1 binding site	MYBHv1 binding site
MsNAC63	CCAAT-box	CAACGG	371	6	-	Hordeum vulgare	MYBHv1 binding site	MYBHv1 binding site
MsNAC64	CCAAT-box	CAACGG	103	6	-	Hordeum vulgare	MYBHv1 binding site	MYBHv1 binding site
MsNAC64	CCAAT-box	CAACGG	680	6	+	Hordeum vulgare	MYBHv1 binding site	MYBHv1 binding site
MsNAC64	CCAAT-box	CAACGG	933	6	-	Hordeum vulgare	MYBHv1 binding site	MYBHv1 binding site
MsNAC66	CCAAT-box	CAACGG	549	6	-	Hordeum vulgare	MYBHv1 binding site	MYBHv1 binding site
MsNAC66	CCAAT-box	CAACGG	1865	6	+	Hordeum vulgare	MYBHv1 binding site	MYBHv1 binding site
MsNAC67	CCAAT-box	CAACGG	1693	6	+	Hordeum vulgare	MYBHv1 binding site	MYBHv1 binding site
MsNAC68	CCAAT-box	CAACGG	1396	6	+	Hordeum vulgare	MYBHv1 binding site	MYBHv1 binding site
MsNAC69	CCAAT-box	CAACGG	107	6	+	Hordeum vulgare	MYBHv1 binding site	MYBHv1 binding site
MsNAC69	CCAAT-box	CAACGG	1592	6	-	Hordeum vulgare	MYBHv1 binding site	MYBHv1 binding site
MsNAC7	CCAAT-box	CAACGG	928	6	-	Hordeum vulgare	MYBHv1 binding site	MYBHv1 binding site
MsNAC70	CCAAT-box	CAACGG	1993	6	-	Hordeum vulgare	MYBHv1 binding site	MYBHv1 binding site
MsNAC73	CCAAT-box	CAACGG	170	6	-	Hordeum vulgare	MYBHv1 binding site	MYBHv1 binding site
MsNAC73	CCAAT-box	CAACGG	454	6	-	Hordeum vulgare	MYBHv1 binding site	MYBHv1 binding site
MsNAC78	CCAAT-box	CAACGG	1368	6	-	Hordeum vulgare	MYBHv1 binding site	MYBHv1 binding site
MsNAC79	CCAAT-box	CAACGG	1631	6	-	Hordeum vulgare	MYBHv1 binding site	MYBHv1 binding site
MsNAC8	CCAAT-box	CAACGG	1838	6	+	Hordeum vulgare	MYBHv1 binding site	MYBHv1 binding site
MsNAC80	CCAAT-box	CAACGG	1065	6	-	Hordeum vulgare	MYBHv1 binding site	MYBHv1 binding site
MsNAC81	CCAAT-box	CAACGG	835	6	+	Hordeum vulgare	MYBHv1 binding site	MYBHv1 binding site
MsNAC81	CCAAT-box	CAACGG	1753	6	-	Hordeum vulgare	MYBHv1 binding site	MYBHv1 binding site
MsNAC85	CCAAT-box	CAACGG	1576	6	-	Hordeum vulgare	MYBHv1 binding site	MYBHv1 binding site
MsNAC88	CCAAT-box	CAACGG	944	6	-	Hordeum vulgare	MYBHv1 binding site	MYBHv1 binding site
MsNAC89	CCAAT-box	CAACGG	252	6	+	Hordeum vulgare	MYBHv1 binding site	MYBHv1 binding site
MsNAC90	CCAAT-box	CAACGG	73	6	-	Hordeum vulgare	MYBHv1 binding site	MYBHv1 binding site
MsNAC90	CCAAT-box	CAACGG	1176	6	+	Hordeum vulgare	MYBHv1 binding site	MYBHv1 binding site
MsNAC92	CCAAT-box	CAACGG	1524	6	-	Hordeum vulgare	MYBHv1 binding site	MYBHv1 binding site
MsNAC93	CCAAT-box	CAACGG	309	6	+	Hordeum vulgare	MYBHv1 binding site	MYBHv1 binding site
MsNAC94	CCAAT-box	CAACGG	1570	6	+	Hordeum vulgare	MYBHv1 binding site	MYBHv1 binding site
MsNAC94	CCAAT-box	CAACGG	1837	6	+	Hordeum vulgare	MYBHv1 binding site	MYBHv1 binding site
MsNAC95	CCAAT-box	CAACGG	1908	6	+	Hordeum vulgare	MYBHv1 binding site	MYBHv1 binding site
MsNAC1	CGTCA-motif	CGTCA	1958	5	-	Hordeum vulgare	cis-acting regulatory element involved in the MeJA-responsiveness	MeJA response
MsNAC1	CGTCA-motif	CGTCA	1961	5	+	Hordeum vulgare	cis-acting regulatory element involved in the MeJA-responsiveness	MeJA response
MsNAC1	TGACG-motif	TGACG	1958	5	+	Hordeum vulgare	cis-acting regulatory element involved in the MeJA-responsiveness	MeJA response
MsNAC1	TGACG-motif	TGACG	1961	5	-	Hordeum vulgare	cis-acting regulatory element involved in the MeJA-responsiveness	MeJA response
MsNAC12	TGACG-motif	TGACG	1483	5	+	Hordeum vulgare	cis-acting regulatory element involved in the MeJA-responsiveness	MeJA response
MsNAC12	CGTCA-motif	CGTCA	1483	5	-	Hordeum vulgare	cis-acting regulatory element involved in the MeJA-responsiveness	MeJA response
MsNAC13	CGTCA-motif	CGTCA	382	5	-	Hordeum vulgare	cis-acting regulatory element involved in the MeJA-responsiveness	MeJA response
MsNAC13	CGTCA-motif	CGTCA	1408	5	+	Hordeum vulgare	cis-acting regulatory element involved in the MeJA-responsiveness	MeJA response
MsNAC13	CGTCA-motif	CGTCA	1475	5	-	Hordeum vulgare	cis-acting regulatory element involved in the MeJA-responsiveness	MeJA response
MsNAC13	CGTCA-motif	CGTCA	1914	5	-	Hordeum vulgare	cis-acting regulatory element involved in the MeJA-responsiveness	MeJA response
MsNAC13	TGACG-motif	TGACG	382	5	+	Hordeum vulgare	cis-acting regulatory element involved in the MeJA-responsiveness	MeJA response
MsNAC13	TGACG-motif	TGACG	1408	5	-	Hordeum vulgare	cis-acting regulatory element involved in the MeJA-responsiveness	MeJA response
MsNAC13	TGACG-motif	TGACG	1475	5	+	Hordeum vulgare	cis-acting regulatory element involved in the MeJA-responsiveness	MeJA response
MsNAC13	TGACG-motif	TGACG	1914	5	+	Hordeum vulgare	cis-acting regulatory element involved in the MeJA-responsiveness	MeJA response
MsNAC14	TGACG-motif	TGACG	1381	5	+	Hordeum vulgare	cis-acting regulatory element involved in the MeJA-responsiveness	MeJA response
MsNAC14	CGTCA-motif	CGTCA	1381	5	-	Hordeum vulgare	cis-acting regulatory element involved in the MeJA-responsiveness	MeJA response
MsNAC16	CGTCA-motif	CGTCA	484	5	+	Hordeum vulgare	cis-acting regulatory element involved in the MeJA-responsiveness	MeJA response
MsNAC16	TGACG-motif	TGACG	484	5	-	Hordeum vulgare	cis-acting regulatory element involved in the MeJA-responsiveness	MeJA response
MsNAC17	TGACG-motif	TGACG	268	5	+	Hordeum vulgare	cis-acting regulatory element involved in the MeJA-responsiveness	MeJA response
MsNAC17	TGACG-motif	TGACG	438	5	+	Hordeum vulgare	cis-acting regulatory element involved in the MeJA-responsiveness	MeJA response
MsNAC17	TGACG-motif	TGACG	1351	5	-	Hordeum vulgare	cis-acting regulatory element involved in the MeJA-responsiveness	MeJA response
MsNAC17	CGTCA-motif	CGTCA	268	5	-	Hordeum vulgare	cis-acting regulatory element involved in the MeJA-responsiveness	MeJA response
MsNAC17	CGTCA-motif	CGTCA	438	5	-	Hordeum vulgare	cis-acting regulatory element involved in the MeJA-responsiveness	MeJA response
MsNAC17	CGTCA-motif	CGTCA	1351	5	+	Hordeum vulgare	cis-acting regulatory element involved in the MeJA-responsiveness	MeJA response
MsNAC18	TGACG-motif	TGACG	777	5	-	Hordeum vulgare	cis-acting regulatory element involved in the MeJA-responsiveness	MeJA response
MsNAC18	TGACG-motif	TGACG	1027	5	+	Hordeum vulgare	cis-acting regulatory element involved in the MeJA-responsiveness	MeJA response
MsNAC18	TGACG-motif	TGACG	1183	5	-	Hordeum vulgare	cis-acting regulatory element involved in the MeJA-responsiveness	MeJA response
MsNAC18	CGTCA-motif	CGTCA	777	5	+	Hordeum vulgare	cis-acting regulatory element involved in the MeJA-responsiveness	MeJA response
MsNAC18	CGTCA-motif	CGTCA	1027	5	-	Hordeum vulgare	cis-acting regulatory element involved in the MeJA-responsiveness	MeJA response
MsNAC18	CGTCA-motif	CGTCA	1183	5	+	Hordeum vulgare	cis-acting regulatory element involved in the MeJA-responsiveness	MeJA response
MsNAC19	TGACG-motif	TGACG	489	5	+	Hordeum vulgare	cis-acting regulatory element involved in the MeJA-responsiveness	MeJA response
MsNAC19	TGACG-motif	TGACG	637	5	+	Hordeum vulgare	cis-acting regulatory element involved in the MeJA-responsiveness	MeJA response
MsNAC19	TGACG-motif	TGACG	640	5	-	Hordeum vulgare	cis-acting regulatory element involved in the MeJA-responsiveness	MeJA response
MsNAC19	TGACG-motif	TGACG	1088	5	+	Hordeum vulgare	cis-acting regulatory element involved in the MeJA-responsiveness	MeJA response
MsNAC19	TGACG-motif	TGACG	1091	5	-	Hordeum vulgare	cis-acting regulatory element involved in the MeJA-responsiveness	MeJA response
MsNAC19	CGTCA-motif	CGTCA	489	5	-	Hordeum vulgare	cis-acting regulatory element involved in the MeJA-responsiveness	MeJA response
MsNAC19	CGTCA-motif	CGTCA	637	5	-	Hordeum vulgare	cis-acting regulatory element involved in the MeJA-responsiveness	MeJA response
MsNAC19	CGTCA-motif	CGTCA	640	5	+	Hordeum vulgare	cis-acting regulatory element involved in the MeJA-responsiveness	MeJA response
MsNAC19	CGTCA-motif	CGTCA	1088	5	-	Hordeum vulgare	cis-acting regulatory element involved in the MeJA-responsiveness	MeJA response
MsNAC19	CGTCA-motif	CGTCA	1091	5	+	Hordeum vulgare	cis-acting regulatory element involved in the MeJA-responsiveness	MeJA response
MsNAC21	TGACG-motif	TGACG	1207	5	-	Hordeum vulgare	cis-acting regulatory element involved in the MeJA-responsiveness	MeJA response
MsNAC21	CGTCA-motif	CGTCA	1207	5	+	Hordeum vulgare	cis-acting regulatory element involved in the MeJA-responsiveness	MeJA response
MsNAC23	TGACG-motif	TGACG	69	5	-	Hordeum vulgare	cis-acting regulatory element involved in the MeJA-responsiveness	MeJA response
MsNAC23	CGTCA-motif	CGTCA	69	5	+	Hordeum vulgare	cis-acting regulatory element involved in the MeJA-responsiveness	MeJA response
MsNAC24	CGTCA-motif	CGTCA	367	5	-	Hordeum vulgare	cis-acting regulatory element involved in the MeJA-responsiveness	MeJA response
MsNAC24	CGTCA-motif	CGTCA	1258	5	+	Hordeum vulgare	cis-acting regulatory element involved in the MeJA-responsiveness	MeJA response
MsNAC24	TGACG-motif	TGACG	367	5	+	Hordeum vulgare	cis-acting regulatory element involved in the MeJA-responsiveness	MeJA response
MsNAC24	TGACG-motif	TGACG	1258	5	-	Hordeum vulgare	cis-acting regulatory element involved in the MeJA-responsiveness	MeJA response
MsNAC27	CGTCA-motif	CGTCA	1371	5	-	Hordeum vulgare	cis-acting regulatory element involved in the MeJA-responsiveness	MeJA response
MsNAC27	CGTCA-motif	CGTCA	1854	5	-	Hordeum vulgare	cis-acting regulatory element involved in the MeJA-responsiveness	MeJA response
MsNAC27	CGTCA-motif	CGTCA	1959	5	-	Hordeum vulgare	cis-acting regulatory element involved in the MeJA-responsiveness	MeJA response
MsNAC27	CGTCA-motif	CGTCA	1962	5	+	Hordeum vulgare	cis-acting regulatory element involved in the MeJA-responsiveness	MeJA response
MsNAC27	TGACG-motif	TGACG	1371	5	+	Hordeum vulgare	cis-acting regulatory element involved in the MeJA-responsiveness	MeJA response
MsNAC27	TGACG-motif	TGACG	1854	5	+	Hordeum vulgare	cis-acting regulatory element involved in the MeJA-responsiveness	MeJA response
MsNAC27	TGACG-motif	TGACG	1959	5	+	Hordeum vulgare	cis-acting regulatory element involved in the MeJA-responsiveness	MeJA response
MsNAC27	TGACG-motif	TGACG	1962	5	-	Hordeum vulgare	cis-acting regulatory element involved in the MeJA-responsiveness	MeJA response
MsNAC28	TGACG-motif	TGACG	290	5	+	Hordeum vulgare	cis-acting regulatory element involved in the MeJA-responsiveness	MeJA response
MsNAC28	TGACG-motif	TGACG	1068	5	+	Hordeum vulgare	cis-acting regulatory element involved in the MeJA-responsiveness	MeJA response
MsNAC28	CGTCA-motif	CGTCA	290	5	-	Hordeum vulgare	cis-acting regulatory element involved in the MeJA-responsiveness	MeJA response
MsNAC28	CGTCA-motif	CGTCA	1068	5	-	Hordeum vulgare	cis-acting regulatory element involved in the MeJA-responsiveness	MeJA response
MsNAC29	TGACG-motif	TGACG	287	5	+	Hordeum vulgare	cis-acting regulatory element involved in the MeJA-responsiveness	MeJA response
MsNAC29	TGACG-motif	TGACG	932	5	-	Hordeum vulgare	cis-acting regulatory element involved in the MeJA-responsiveness	MeJA response
MsNAC29	CGTCA-motif	CGTCA	287	5	-	Hordeum vulgare	cis-acting regulatory element involved in the MeJA-responsiveness	MeJA response
MsNAC29	CGTCA-motif	CGTCA	932	5	+	Hordeum vulgare	cis-acting regulatory element involved in the MeJA-responsiveness	MeJA response
MsNAC3	TGACG-motif	TGACG	115	5	+	Hordeum vulgare	cis-acting regulatory element involved in the MeJA-responsiveness	MeJA response
MsNAC3	TGACG-motif	TGACG	124	5	+	Hordeum vulgare	cis-acting regulatory element involved in the MeJA-responsiveness	MeJA response
MsNAC3	CGTCA-motif	CGTCA	115	5	-	Hordeum vulgare	cis-acting regulatory element involved in the MeJA-responsiveness	MeJA response
MsNAC3	CGTCA-motif	CGTCA	124	5	-	Hordeum vulgare	cis-acting regulatory element involved in the MeJA-responsiveness	MeJA response
MsNAC30	CGTCA-motif	CGTCA	82	5	+	Hordeum vulgare	cis-acting regulatory element involved in the MeJA-responsiveness	MeJA response
MsNAC30	TGACG-motif	TGACG	82	5	-	Hordeum vulgare	cis-acting regulatory element involved in the MeJA-responsiveness	MeJA response
MsNAC32	TGACG-motif	TGACG	281	5	-	Hordeum vulgare	cis-acting regulatory element involved in the MeJA-responsiveness	MeJA response
MsNAC32	TGACG-motif	TGACG	1005	5	-	Hordeum vulgare	cis-acting regulatory element involved in the MeJA-responsiveness	MeJA response
MsNAC32	TGACG-motif	TGACG	1930	5	+	Hordeum vulgare	cis-acting regulatory element involved in the MeJA-responsiveness	MeJA response
MsNAC32	CGTCA-motif	CGTCA	281	5	+	Hordeum vulgare	cis-acting regulatory element involved in the MeJA-responsiveness	MeJA response
MsNAC32	CGTCA-motif	CGTCA	1005	5	+	Hordeum vulgare	cis-acting regulatory element involved in the MeJA-responsiveness	MeJA response
MsNAC32	CGTCA-motif	CGTCA	1930	5	-	Hordeum vulgare	cis-acting regulatory element involved in the MeJA-responsiveness	MeJA response
MsNAC33	CGTCA-motif	CGTCA	256	5	-	Hordeum vulgare	cis-acting regulatory element involved in the MeJA-responsiveness	MeJA response
MsNAC33	CGTCA-motif	CGTCA	1749	5	-	Hordeum vulgare	cis-acting regulatory element involved in the MeJA-responsiveness	MeJA response
MsNAC33	CGTCA-motif	CGTCA	1780	5	-	Hordeum vulgare	cis-acting regulatory element involved in the MeJA-responsiveness	MeJA response
MsNAC33	TGACG-motif	TGACG	256	5	+	Hordeum vulgare	cis-acting regulatory element involved in the MeJA-responsiveness	MeJA response
MsNAC33	TGACG-motif	TGACG	1749	5	+	Hordeum vulgare	cis-acting regulatory element involved in the MeJA-responsiveness	MeJA response
MsNAC33	TGACG-motif	TGACG	1780	5	+	Hordeum vulgare	cis-acting regulatory element involved in the MeJA-responsiveness	MeJA response
MsNAC35	TGACG-motif	TGACG	776	5	+	Hordeum vulgare	cis-acting regulatory element involved in the MeJA-responsiveness	MeJA response
MsNAC35	TGACG-motif	TGACG	844	5	-	Hordeum vulgare	cis-acting regulatory element involved in the MeJA-responsiveness	MeJA response
MsNAC35	TGACG-motif	TGACG	1419	5	+	Hordeum vulgare	cis-acting regulatory element involved in the MeJA-responsiveness	MeJA response
MsNAC35	CGTCA-motif	CGTCA	776	5	-	Hordeum vulgare	cis-acting regulatory element involved in the MeJA-responsiveness	MeJA response
MsNAC35	CGTCA-motif	CGTCA	844	5	+	Hordeum vulgare	cis-acting regulatory element involved in the MeJA-responsiveness	MeJA response
MsNAC35	CGTCA-motif	CGTCA	1419	5	-	Hordeum vulgare	cis-acting regulatory element involved in the MeJA-responsiveness	MeJA response
MsNAC37	CGTCA-motif	CGTCA	307	5	-	Hordeum vulgare	cis-acting regulatory element involved in the MeJA-responsiveness	MeJA response
MsNAC37	TGACG-motif	TGACG	307	5	+	Hordeum vulgare	cis-acting regulatory element involved in the MeJA-responsiveness	MeJA response
MsNAC40	CGTCA-motif	CGTCA	167	5	-	Hordeum vulgare	cis-acting regulatory element involved in the MeJA-responsiveness	MeJA response
MsNAC40	CGTCA-motif	CGTCA	1866	5	+	Hordeum vulgare	cis-acting regulatory element involved in the MeJA-responsiveness	MeJA response
MsNAC40	TGACG-motif	TGACG	167	5	+	Hordeum vulgare	cis-acting regulatory element involved in the MeJA-responsiveness	MeJA response
MsNAC40	TGACG-motif	TGACG	1866	5	-	Hordeum vulgare	cis-acting regulatory element involved in the MeJA-responsiveness	MeJA response
MsNAC41	TGACG-motif	TGACG	387	5	+	Hordeum vulgare	cis-acting regulatory element involved in the MeJA-responsiveness	MeJA response
MsNAC41	TGACG-motif	TGACG	1336	5	-	Hordeum vulgare	cis-acting regulatory element involved in the MeJA-responsiveness	MeJA response
MsNAC41	TGACG-motif	TGACG	1675	5	-	Hordeum vulgare	cis-acting regulatory element involved in the MeJA-responsiveness	MeJA response
MsNAC41	TGACG-motif	TGACG	1804	5	+	Hordeum vulgare	cis-acting regulatory element involved in the MeJA-responsiveness	MeJA response
MsNAC41	CGTCA-motif	CGTCA	387	5	-	Hordeum vulgare	cis-acting regulatory element involved in the MeJA-responsiveness	MeJA response
MsNAC41	CGTCA-motif	CGTCA	1336	5	+	Hordeum vulgare	cis-acting regulatory element involved in the MeJA-responsiveness	MeJA response
MsNAC41	CGTCA-motif	CGTCA	1675	5	+	Hordeum vulgare	cis-acting regulatory element involved in the MeJA-responsiveness	MeJA response
MsNAC41	CGTCA-motif	CGTCA	1804	5	-	Hordeum vulgare	cis-acting regulatory element involved in the MeJA-responsiveness	MeJA response
MsNAC42	TGACG-motif	TGACG	274	5	-	Hordeum vulgare	cis-acting regulatory element involved in the MeJA-responsiveness	MeJA response
MsNAC42	TGACG-motif	TGACG	821	5	-	Hordeum vulgare	cis-acting regulatory element involved in the MeJA-responsiveness	MeJA response
MsNAC42	TGACG-motif	TGACG	1788	5	-	Hordeum vulgare	cis-acting regulatory element involved in the MeJA-responsiveness	MeJA response
MsNAC42	CGTCA-motif	CGTCA	274	5	+	Hordeum vulgare	cis-acting regulatory element involved in the MeJA-responsiveness	MeJA response
MsNAC42	CGTCA-motif	CGTCA	821	5	+	Hordeum vulgare	cis-acting regulatory element involved in the MeJA-responsiveness	MeJA response
MsNAC42	CGTCA-motif	CGTCA	1788	5	+	Hordeum vulgare	cis-acting regulatory element involved in the MeJA-responsiveness	MeJA response
MsNAC43	TGACG-motif	TGACG	433	5	-	Hordeum vulgare	cis-acting regulatory element involved in the MeJA-responsiveness	MeJA response
MsNAC43	TGACG-motif	TGACG	1619	5	-	Hordeum vulgare	cis-acting regulatory element involved in the MeJA-responsiveness	MeJA response
MsNAC43	TGACG-motif	TGACG	1778	5	-	Hordeum vulgare	cis-acting regulatory element involved in the MeJA-responsiveness	MeJA response
MsNAC43	CGTCA-motif	CGTCA	433	5	+	Hordeum vulgare	cis-acting regulatory element involved in the MeJA-responsiveness	MeJA response
MsNAC43	CGTCA-motif	CGTCA	1619	5	+	Hordeum vulgare	cis-acting regulatory element involved in the MeJA-responsiveness	MeJA response
MsNAC43	CGTCA-motif	CGTCA	1778	5	+	Hordeum vulgare	cis-acting regulatory element involved in the MeJA-responsiveness	MeJA response
MsNAC44	CGTCA-motif	CGTCA	1367	5	+	Hordeum vulgare	cis-acting regulatory element involved in the MeJA-responsiveness	MeJA response
MsNAC44	CGTCA-motif	CGTCA	1601	5	-	Hordeum vulgare	cis-acting regulatory element involved in the MeJA-responsiveness	MeJA response
MsNAC44	CGTCA-motif	CGTCA	1777	5	+	Hordeum vulgare	cis-acting regulatory element involved in the MeJA-responsiveness	MeJA response
MsNAC44	TGACG-motif	TGACG	1367	5	-	Hordeum vulgare	cis-acting regulatory element involved in the MeJA-responsiveness	MeJA response
MsNAC44	TGACG-motif	TGACG	1601	5	+	Hordeum vulgare	cis-acting regulatory element involved in the MeJA-responsiveness	MeJA response
MsNAC44	TGACG-motif	TGACG	1777	5	-	Hordeum vulgare	cis-acting regulatory element involved in the MeJA-responsiveness	MeJA response
MsNAC45	CGTCA-motif	CGTCA	1873	5	-	Hordeum vulgare	cis-acting regulatory element involved in the MeJA-responsiveness	MeJA response
MsNAC45	CGTCA-motif	CGTCA	1879	5	-	Hordeum vulgare	cis-acting regulatory element involved in the MeJA-responsiveness	MeJA response
MsNAC45	CGTCA-motif	CGTCA	1882	5	+	Hordeum vulgare	cis-acting regulatory element involved in the MeJA-responsiveness	MeJA response
MsNAC45	TGACG-motif	TGACG	1873	5	+	Hordeum vulgare	cis-acting regulatory element involved in the MeJA-responsiveness	MeJA response
MsNAC45	TGACG-motif	TGACG	1879	5	+	Hordeum vulgare	cis-acting regulatory element involved in the MeJA-responsiveness	MeJA response
MsNAC45	TGACG-motif	TGACG	1882	5	-	Hordeum vulgare	cis-acting regulatory element involved in the MeJA-responsiveness	MeJA response
MsNAC46	CGTCA-motif	CGTCA	1592	5	+	Hordeum vulgare	cis-acting regulatory element involved in the MeJA-responsiveness	MeJA response
MsNAC46	TGACG-motif	TGACG	1592	5	-	Hordeum vulgare	cis-acting regulatory element involved in the MeJA-responsiveness	MeJA response
MsNAC48	TGACG-motif	TGACG	711	5	+	Hordeum vulgare	cis-acting regulatory element involved in the MeJA-responsiveness	MeJA response
MsNAC48	CGTCA-motif	CGTCA	711	5	-	Hordeum vulgare	cis-acting regulatory element involved in the MeJA-responsiveness	MeJA response
MsNAC49	CGTCA-motif	CGTCA	856	5	-	Hordeum vulgare	cis-acting regulatory element involved in the MeJA-responsiveness	MeJA response
MsNAC49	CGTCA-motif	CGTCA	1261	5	+	Hordeum vulgare	cis-acting regulatory element involved in the MeJA-responsiveness	MeJA response
MsNAC49	CGTCA-motif	CGTCA	1782	5	-	Hordeum vulgare	cis-acting regulatory element involved in the MeJA-responsiveness	MeJA response
MsNAC49	TGACG-motif	TGACG	856	5	+	Hordeum vulgare	cis-acting regulatory element involved in the MeJA-responsiveness	MeJA response
MsNAC49	TGACG-motif	TGACG	1261	5	-	Hordeum vulgare	cis-acting regulatory element involved in the MeJA-responsiveness	MeJA response
MsNAC49	TGACG-motif	TGACG	1782	5	+	Hordeum vulgare	cis-acting regulatory element involved in the MeJA-responsiveness	MeJA response
MsNAC5	TGACG-motif	TGACG	197	5	+	Hordeum vulgare	cis-acting regulatory element involved in the MeJA-responsiveness	MeJA response
MsNAC5	TGACG-motif	TGACG	724	5	+	Hordeum vulgare	cis-acting regulatory element involved in the MeJA-responsiveness	MeJA response
MsNAC5	CGTCA-motif	CGTCA	197	5	-	Hordeum vulgare	cis-acting regulatory element involved in the MeJA-responsiveness	MeJA response
MsNAC5	CGTCA-motif	CGTCA	724	5	-	Hordeum vulgare	cis-acting regulatory element involved in the MeJA-responsiveness	MeJA response
MsNAC50	TGACG-motif	TGACG	252	5	+	Hordeum vulgare	cis-acting regulatory element involved in the MeJA-responsiveness	MeJA response
MsNAC50	TGACG-motif	TGACG	1168	5	+	Hordeum vulgare	cis-acting regulatory element involved in the MeJA-responsiveness	MeJA response
MsNAC50	TGACG-motif	TGACG	1205	5	+	Hordeum vulgare	cis-acting regulatory element involved in the MeJA-responsiveness	MeJA response
MsNAC50	CGTCA-motif	CGTCA	252	5	-	Hordeum vulgare	cis-acting regulatory element involved in the MeJA-responsiveness	MeJA response
MsNAC50	CGTCA-motif	CGTCA	1168	5	-	Hordeum vulgare	cis-acting regulatory element involved in the MeJA-responsiveness	MeJA response
MsNAC50	CGTCA-motif	CGTCA	1205	5	-	Hordeum vulgare	cis-acting regulatory element involved in the MeJA-responsiveness	MeJA response
MsNAC51	CGTCA-motif	CGTCA	826	5	+	Hordeum vulgare	cis-acting regulatory element involved in the MeJA-responsiveness	MeJA response
MsNAC51	CGTCA-motif	CGTCA	934	5	-	Hordeum vulgare	cis-acting regulatory element involved in the MeJA-responsiveness	MeJA response
MsNAC51	TGACG-motif	TGACG	826	5	-	Hordeum vulgare	cis-acting regulatory element involved in the MeJA-responsiveness	MeJA response
MsNAC51	TGACG-motif	TGACG	934	5	+	Hordeum vulgare	cis-acting regulatory element involved in the MeJA-responsiveness	MeJA response
MsNAC53	TGACG-motif	TGACG	456	5	-	Hordeum vulgare	cis-acting regulatory element involved in the MeJA-responsiveness	MeJA response
MsNAC53	TGACG-motif	TGACG	974	5	-	Hordeum vulgare	cis-acting regulatory element involved in the MeJA-responsiveness	MeJA response
MsNAC53	TGACG-motif	TGACG	1647	5	+	Hordeum vulgare	cis-acting regulatory element involved in the MeJA-responsiveness	MeJA response
MsNAC53	CGTCA-motif	CGTCA	456	5	+	Hordeum vulgare	cis-acting regulatory element involved in the MeJA-responsiveness	MeJA response
MsNAC53	CGTCA-motif	CGTCA	974	5	+	Hordeum vulgare	cis-acting regulatory element involved in the MeJA-responsiveness	MeJA response
MsNAC53	CGTCA-motif	CGTCA	1647	5	-	Hordeum vulgare	cis-acting regulatory element involved in the MeJA-responsiveness	MeJA response
MsNAC54	CGTCA-motif	CGTCA	1525	5	-	Hordeum vulgare	cis-acting regulatory element involved in the MeJA-responsiveness	MeJA response
MsNAC54	TGACG-motif	TGACG	1525	5	+	Hordeum vulgare	cis-acting regulatory element involved in the MeJA-responsiveness	MeJA response
MsNAC56	CGTCA-motif	CGTCA	780	5	-	Hordeum vulgare	cis-acting regulatory element involved in the MeJA-responsiveness	MeJA response
MsNAC56	TGACG-motif	TGACG	780	5	+	Hordeum vulgare	cis-acting regulatory element involved in the MeJA-responsiveness	MeJA response
MsNAC57	CGTCA-motif	CGTCA	698	5	+	Hordeum vulgare	cis-acting regulatory element involved in the MeJA-responsiveness	MeJA response
MsNAC57	CGTCA-motif	CGTCA	1440	5	-	Hordeum vulgare	cis-acting regulatory element involved in the MeJA-responsiveness	MeJA response
MsNAC57	CGTCA-motif	CGTCA	1794	5	-	Hordeum vulgare	cis-acting regulatory element involved in the MeJA-responsiveness	MeJA response
MsNAC57	TGACG-motif	TGACG	698	5	-	Hordeum vulgare	cis-acting regulatory element involved in the MeJA-responsiveness	MeJA response
MsNAC57	TGACG-motif	TGACG	1440	5	+	Hordeum vulgare	cis-acting regulatory element involved in the MeJA-responsiveness	MeJA response
MsNAC57	TGACG-motif	TGACG	1794	5	+	Hordeum vulgare	cis-acting regulatory element involved in the MeJA-responsiveness	MeJA response
MsNAC58	CGTCA-motif	CGTCA	870	5	-	Hordeum vulgare	cis-acting regulatory element involved in the MeJA-responsiveness	MeJA response
MsNAC58	CGTCA-motif	CGTCA	873	5	+	Hordeum vulgare	cis-acting regulatory element involved in the MeJA-responsiveness	MeJA response
MsNAC58	CGTCA-motif	CGTCA	1223	5	-	Hordeum vulgare	cis-acting regulatory element involved in the MeJA-responsiveness	MeJA response
MsNAC58	CGTCA-motif	CGTCA	1344	5	-	Hordeum vulgare	cis-acting regulatory element involved in the MeJA-responsiveness	MeJA response
MsNAC58	TGACG-motif	TGACG	870	5	+	Hordeum vulgare	cis-acting regulatory element involved in the MeJA-responsiveness	MeJA response
MsNAC58	TGACG-motif	TGACG	873	5	-	Hordeum vulgare	cis-acting regulatory element involved in the MeJA-responsiveness	MeJA response
MsNAC58	TGACG-motif	TGACG	1223	5	+	Hordeum vulgare	cis-acting regulatory element involved in the MeJA-responsiveness	MeJA response
MsNAC58	TGACG-motif	TGACG	1344	5	+	Hordeum vulgare	cis-acting regulatory element involved in the MeJA-responsiveness	MeJA response
MsNAC59	CGTCA-motif	CGTCA	1449	5	+	Hordeum vulgare	cis-acting regulatory element involved in the MeJA-responsiveness	MeJA response
MsNAC59	CGTCA-motif	CGTCA	1742	5	-	Hordeum vulgare	cis-acting regulatory element involved in the MeJA-responsiveness	MeJA response
MsNAC59	TGACG-motif	TGACG	1449	5	-	Hordeum vulgare	cis-acting regulatory element involved in the MeJA-responsiveness	MeJA response
MsNAC59	TGACG-motif	TGACG	1742	5	+	Hordeum vulgare	cis-acting regulatory element involved in the MeJA-responsiveness	MeJA response
MsNAC6	CGTCA-motif	CGTCA	1582	5	-	Hordeum vulgare	cis-acting regulatory element involved in the MeJA-responsiveness	MeJA response
MsNAC6	TGACG-motif	TGACG	1582	5	+	Hordeum vulgare	cis-acting regulatory element involved in the MeJA-responsiveness	MeJA response
MsNAC60	CGTCA-motif	CGTCA	37	5	-	Hordeum vulgare	cis-acting regulatory element involved in the MeJA-responsiveness	MeJA response
MsNAC60	CGTCA-motif	CGTCA	48	5	+	Hordeum vulgare	cis-acting regulatory element involved in the MeJA-responsiveness	MeJA response
MsNAC60	CGTCA-motif	CGTCA	372	5	+	Hordeum vulgare	cis-acting regulatory element involved in the MeJA-responsiveness	MeJA response
MsNAC60	CGTCA-motif	CGTCA	696	5	+	Hordeum vulgare	cis-acting regulatory element involved in the MeJA-responsiveness	MeJA response
MsNAC60	CGTCA-motif	CGTCA	1347	5	+	Hordeum vulgare	cis-acting regulatory element involved in the MeJA-responsiveness	MeJA response
MsNAC60	TGACG-motif	TGACG	37	5	+	Hordeum vulgare	cis-acting regulatory element involved in the MeJA-responsiveness	MeJA response
MsNAC60	TGACG-motif	TGACG	48	5	-	Hordeum vulgare	cis-acting regulatory element involved in the MeJA-responsiveness	MeJA response
MsNAC60	TGACG-motif	TGACG	372	5	-	Hordeum vulgare	cis-acting regulatory element involved in the MeJA-responsiveness	MeJA response
MsNAC60	TGACG-motif	TGACG	696	5	-	Hordeum vulgare	cis-acting regulatory element involved in the MeJA-responsiveness	MeJA response
MsNAC60	TGACG-motif	TGACG	1347	5	-	Hordeum vulgare	cis-acting regulatory element involved in the MeJA-responsiveness	MeJA response
MsNAC61	TGACG-motif	TGACG	1222	5	+	Hordeum vulgare	cis-acting regulatory element involved in the MeJA-responsiveness	MeJA response
MsNAC61	TGACG-motif	TGACG	1867	5	-	Hordeum vulgare	cis-acting regulatory element involved in the MeJA-responsiveness	MeJA response
MsNAC61	TGACG-motif	TGACG	1912	5	-	Hordeum vulgare	cis-acting regulatory element involved in the MeJA-responsiveness	MeJA response
MsNAC61	CGTCA-motif	CGTCA	1222	5	-	Hordeum vulgare	cis-acting regulatory element involved in the MeJA-responsiveness	MeJA response
MsNAC61	CGTCA-motif	CGTCA	1867	5	+	Hordeum vulgare	cis-acting regulatory element involved in the MeJA-responsiveness	MeJA response
MsNAC61	CGTCA-motif	CGTCA	1912	5	+	Hordeum vulgare	cis-acting regulatory element involved in the MeJA-responsiveness	MeJA response
MsNAC62	TGACG-motif	TGACG	586	5	+	Hordeum vulgare	cis-acting regulatory element involved in the MeJA-responsiveness	MeJA response
MsNAC62	TGACG-motif	TGACG	908	5	-	Hordeum vulgare	cis-acting regulatory element involved in the MeJA-responsiveness	MeJA response
MsNAC62	TGACG-motif	TGACG	1009	5	-	Hordeum vulgare	cis-acting regulatory element involved in the MeJA-responsiveness	MeJA response
MsNAC62	CGTCA-motif	CGTCA	586	5	-	Hordeum vulgare	cis-acting regulatory element involved in the MeJA-responsiveness	MeJA response
MsNAC62	CGTCA-motif	CGTCA	908	5	+	Hordeum vulgare	cis-acting regulatory element involved in the MeJA-responsiveness	MeJA response
MsNAC62	CGTCA-motif	CGTCA	1009	5	+	Hordeum vulgare	cis-acting regulatory element involved in the MeJA-responsiveness	MeJA response
MsNAC63	TGACG-motif	TGACG	193	5	+	Hordeum vulgare	cis-acting regulatory element involved in the MeJA-responsiveness	MeJA response
MsNAC63	CGTCA-motif	CGTCA	193	5	-	Hordeum vulgare	cis-acting regulatory element involved in the MeJA-responsiveness	MeJA response
MsNAC64	TGACG-motif	TGACG	16	5	-	Hordeum vulgare	cis-acting regulatory element involved in the MeJA-responsiveness	MeJA response
MsNAC64	TGACG-motif	TGACG	60	5	+	Hordeum vulgare	cis-acting regulatory element involved in the MeJA-responsiveness	MeJA response
MsNAC64	TGACG-motif	TGACG	1022	5	-	Hordeum vulgare	cis-acting regulatory element involved in the MeJA-responsiveness	MeJA response
MsNAC64	TGACG-motif	TGACG	1363	5	+	Hordeum vulgare	cis-acting regulatory element involved in the MeJA-responsiveness	MeJA response
MsNAC64	CGTCA-motif	CGTCA	16	5	+	Hordeum vulgare	cis-acting regulatory element involved in the MeJA-responsiveness	MeJA response
MsNAC64	CGTCA-motif	CGTCA	60	5	-	Hordeum vulgare	cis-acting regulatory element involved in the MeJA-responsiveness	MeJA response
MsNAC64	CGTCA-motif	CGTCA	1022	5	+	Hordeum vulgare	cis-acting regulatory element involved in the MeJA-responsiveness	MeJA response
MsNAC64	CGTCA-motif	CGTCA	1363	5	-	Hordeum vulgare	cis-acting regulatory element involved in the MeJA-responsiveness	MeJA response
MsNAC65	CGTCA-motif	CGTCA	1731	5	-	Hordeum vulgare	cis-acting regulatory element involved in the MeJA-responsiveness	MeJA response
MsNAC65	TGACG-motif	TGACG	1731	5	+	Hordeum vulgare	cis-acting regulatory element involved in the MeJA-responsiveness	MeJA response
MsNAC66	TGACG-motif	TGACG	1763	5	+	Hordeum vulgare	cis-acting regulatory element involved in the MeJA-responsiveness	MeJA response
MsNAC66	TGACG-motif	TGACG	1949	5	+	Hordeum vulgare	cis-acting regulatory element involved in the MeJA-responsiveness	MeJA response
MsNAC66	CGTCA-motif	CGTCA	1763	5	-	Hordeum vulgare	cis-acting regulatory element involved in the MeJA-responsiveness	MeJA response
MsNAC66	CGTCA-motif	CGTCA	1949	5	-	Hordeum vulgare	cis-acting regulatory element involved in the MeJA-responsiveness	MeJA response
MsNAC68	TGACG-motif	TGACG	1529	5	-	Hordeum vulgare	cis-acting regulatory element involved in the MeJA-responsiveness	MeJA response
MsNAC68	TGACG-motif	TGACG	1698	5	-	Hordeum vulgare	cis-acting regulatory element involved in the MeJA-responsiveness	MeJA response
MsNAC68	TGACG-motif	TGACG	1721	5	+	Hordeum vulgare	cis-acting regulatory element involved in the MeJA-responsiveness	MeJA response
MsNAC68	CGTCA-motif	CGTCA	1529	5	+	Hordeum vulgare	cis-acting regulatory element involved in the MeJA-responsiveness	MeJA response
MsNAC68	CGTCA-motif	CGTCA	1698	5	+	Hordeum vulgare	cis-acting regulatory element involved in the MeJA-responsiveness	MeJA response
MsNAC68	CGTCA-motif	CGTCA	1721	5	-	Hordeum vulgare	cis-acting regulatory element involved in the MeJA-responsiveness	MeJA response
MsNAC69	TGACG-motif	TGACG	6	5	+	Hordeum vulgare	cis-acting regulatory element involved in the MeJA-responsiveness	MeJA response
MsNAC69	TGACG-motif	TGACG	1173	5	+	Hordeum vulgare	cis-acting regulatory element involved in the MeJA-responsiveness	MeJA response
MsNAC69	TGACG-motif	TGACG	1270	5	+	Hordeum vulgare	cis-acting regulatory element involved in the MeJA-responsiveness	MeJA response
MsNAC69	CGTCA-motif	CGTCA	6	5	-	Hordeum vulgare	cis-acting regulatory element involved in the MeJA-responsiveness	MeJA response
MsNAC69	CGTCA-motif	CGTCA	1173	5	-	Hordeum vulgare	cis-acting regulatory element involved in the MeJA-responsiveness	MeJA response
MsNAC69	CGTCA-motif	CGTCA	1270	5	-	Hordeum vulgare	cis-acting regulatory element involved in the MeJA-responsiveness	MeJA response
MsNAC70	TGACG-motif	TGACG	1879	5	+	Hordeum vulgare	cis-acting regulatory element involved in the MeJA-responsiveness	MeJA response
MsNAC70	TGACG-motif	TGACG	1913	5	+	Hordeum vulgare	cis-acting regulatory element involved in the MeJA-responsiveness	MeJA response
MsNAC70	TGACG-motif	TGACG	1937	5	+	Hordeum vulgare	cis-acting regulatory element involved in the MeJA-responsiveness	MeJA response
MsNAC70	CGTCA-motif	CGTCA	1879	5	-	Hordeum vulgare	cis-acting regulatory element involved in the MeJA-responsiveness	MeJA response
MsNAC70	CGTCA-motif	CGTCA	1913	5	-	Hordeum vulgare	cis-acting regulatory element involved in the MeJA-responsiveness	MeJA response
MsNAC70	CGTCA-motif	CGTCA	1937	5	-	Hordeum vulgare	cis-acting regulatory element involved in the MeJA-responsiveness	MeJA response
MsNAC72	TGACG-motif	TGACG	453	5	-	Hordeum vulgare	cis-acting regulatory element involved in the MeJA-responsiveness	MeJA response
MsNAC72	TGACG-motif	TGACG	716	5	-	Hordeum vulgare	cis-acting regulatory element involved in the MeJA-responsiveness	MeJA response
MsNAC72	TGACG-motif	TGACG	1537	5	-	Hordeum vulgare	cis-acting regulatory element involved in the MeJA-responsiveness	MeJA response
MsNAC72	CGTCA-motif	CGTCA	453	5	+	Hordeum vulgare	cis-acting regulatory element involved in the MeJA-responsiveness	MeJA response
MsNAC72	CGTCA-motif	CGTCA	716	5	+	Hordeum vulgare	cis-acting regulatory element involved in the MeJA-responsiveness	MeJA response
MsNAC72	CGTCA-motif	CGTCA	1537	5	+	Hordeum vulgare	cis-acting regulatory element involved in the MeJA-responsiveness	MeJA response
MsNAC73	TGACG-motif	TGACG	267	5	+	Hordeum vulgare	cis-acting regulatory element involved in the MeJA-responsiveness	MeJA response
MsNAC73	TGACG-motif	TGACG	363	5	-	Hordeum vulgare	cis-acting regulatory element involved in the MeJA-responsiveness	MeJA response
MsNAC73	TGACG-motif	TGACG	811	5	-	Hordeum vulgare	cis-acting regulatory element involved in the MeJA-responsiveness	MeJA response
MsNAC73	TGACG-motif	TGACG	1281	5	+	Hordeum vulgare	cis-acting regulatory element involved in the MeJA-responsiveness	MeJA response
MsNAC73	CGTCA-motif	CGTCA	267	5	-	Hordeum vulgare	cis-acting regulatory element involved in the MeJA-responsiveness	MeJA response
MsNAC73	CGTCA-motif	CGTCA	363	5	+	Hordeum vulgare	cis-acting regulatory element involved in the MeJA-responsiveness	MeJA response
MsNAC73	CGTCA-motif	CGTCA	811	5	+	Hordeum vulgare	cis-acting regulatory element involved in the MeJA-responsiveness	MeJA response
MsNAC73	CGTCA-motif	CGTCA	1281	5	-	Hordeum vulgare	cis-acting regulatory element involved in the MeJA-responsiveness	MeJA response
MsNAC74	CGTCA-motif	CGTCA	876	5	-	Hordeum vulgare	cis-acting regulatory element involved in the MeJA-responsiveness	MeJA response
MsNAC74	CGTCA-motif	CGTCA	1302	5	+	Hordeum vulgare	cis-acting regulatory element involved in the MeJA-responsiveness	MeJA response
MsNAC74	TGACG-motif	TGACG	876	5	+	Hordeum vulgare	cis-acting regulatory element involved in the MeJA-responsiveness	MeJA response
MsNAC74	TGACG-motif	TGACG	1302	5	-	Hordeum vulgare	cis-acting regulatory element involved in the MeJA-responsiveness	MeJA response
MsNAC78	TGACG-motif	TGACG	51	5	+	Hordeum vulgare	cis-acting regulatory element involved in the MeJA-responsiveness	MeJA response
MsNAC78	CGTCA-motif	CGTCA	51	5	-	Hordeum vulgare	cis-acting regulatory element involved in the MeJA-responsiveness	MeJA response
MsNAC8	TGACG-motif	TGACG	198	5	+	Hordeum vulgare	cis-acting regulatory element involved in the MeJA-responsiveness	MeJA response
MsNAC8	TGACG-motif	TGACG	466	5	+	Hordeum vulgare	cis-acting regulatory element involved in the MeJA-responsiveness	MeJA response
MsNAC8	TGACG-motif	TGACG	527	5	+	Hordeum vulgare	cis-acting regulatory element involved in the MeJA-responsiveness	MeJA response
MsNAC8	TGACG-motif	TGACG	1684	5	+	Hordeum vulgare	cis-acting regulatory element involved in the MeJA-responsiveness	MeJA response
MsNAC8	TGACG-motif	TGACG	1687	5	-	Hordeum vulgare	cis-acting regulatory element involved in the MeJA-responsiveness	MeJA response
MsNAC8	TGACG-motif	TGACG	1710	5	-	Hordeum vulgare	cis-acting regulatory element involved in the MeJA-responsiveness	MeJA response
MsNAC8	TGACG-motif	TGACG	1719	5	+	Hordeum vulgare	cis-acting regulatory element involved in the MeJA-responsiveness	MeJA response
MsNAC8	CGTCA-motif	CGTCA	198	5	-	Hordeum vulgare	cis-acting regulatory element involved in the MeJA-responsiveness	MeJA response
MsNAC8	CGTCA-motif	CGTCA	466	5	-	Hordeum vulgare	cis-acting regulatory element involved in the MeJA-responsiveness	MeJA response
MsNAC8	CGTCA-motif	CGTCA	527	5	-	Hordeum vulgare	cis-acting regulatory element involved in the MeJA-responsiveness	MeJA response
MsNAC8	CGTCA-motif	CGTCA	1684	5	-	Hordeum vulgare	cis-acting regulatory element involved in the MeJA-responsiveness	MeJA response
MsNAC8	CGTCA-motif	CGTCA	1687	5	+	Hordeum vulgare	cis-acting regulatory element involved in the MeJA-responsiveness	MeJA response
MsNAC8	CGTCA-motif	CGTCA	1710	5	+	Hordeum vulgare	cis-acting regulatory element involved in the MeJA-responsiveness	MeJA response
MsNAC8	CGTCA-motif	CGTCA	1719	5	-	Hordeum vulgare	cis-acting regulatory element involved in the MeJA-responsiveness	MeJA response
MsNAC81	CGTCA-motif	CGTCA	1199	5	-	Hordeum vulgare	cis-acting regulatory element involved in the MeJA-responsiveness	MeJA response
MsNAC81	CGTCA-motif	CGTCA	1278	5	-	Hordeum vulgare	cis-acting regulatory element involved in the MeJA-responsiveness	MeJA response
MsNAC81	CGTCA-motif	CGTCA	1929	5	+	Hordeum vulgare	cis-acting regulatory element involved in the MeJA-responsiveness	MeJA response
MsNAC81	TGACG-motif	TGACG	1199	5	+	Hordeum vulgare	cis-acting regulatory element involved in the MeJA-responsiveness	MeJA response
MsNAC81	TGACG-motif	TGACG	1278	5	+	Hordeum vulgare	cis-acting regulatory element involved in the MeJA-responsiveness	MeJA response
MsNAC81	TGACG-motif	TGACG	1929	5	-	Hordeum vulgare	cis-acting regulatory element involved in the MeJA-responsiveness	MeJA response
MsNAC82	CGTCA-motif	CGTCA	667	5	+	Hordeum vulgare	cis-acting regulatory element involved in the MeJA-responsiveness	MeJA response
MsNAC82	CGTCA-motif	CGTCA	1176	5	+	Hordeum vulgare	cis-acting regulatory element involved in the MeJA-responsiveness	MeJA response
MsNAC82	CGTCA-motif	CGTCA	1361	5	-	Hordeum vulgare	cis-acting regulatory element involved in the MeJA-responsiveness	MeJA response
MsNAC82	TGACG-motif	TGACG	667	5	-	Hordeum vulgare	cis-acting regulatory element involved in the MeJA-responsiveness	MeJA response
MsNAC82	TGACG-motif	TGACG	1176	5	-	Hordeum vulgare	cis-acting regulatory element involved in the MeJA-responsiveness	MeJA response
MsNAC82	TGACG-motif	TGACG	1361	5	+	Hordeum vulgare	cis-acting regulatory element involved in the MeJA-responsiveness	MeJA response
MsNAC86	TGACG-motif	TGACG	1946	5	-	Hordeum vulgare	cis-acting regulatory element involved in the MeJA-responsiveness	MeJA response
MsNAC86	CGTCA-motif	CGTCA	1946	5	+	Hordeum vulgare	cis-acting regulatory element involved in the MeJA-responsiveness	MeJA response
MsNAC87	TGACG-motif	TGACG	342	5	+	Hordeum vulgare	cis-acting regulatory element involved in the MeJA-responsiveness	MeJA response
MsNAC87	TGACG-motif	TGACG	613	5	+	Hordeum vulgare	cis-acting regulatory element involved in the MeJA-responsiveness	MeJA response
MsNAC87	CGTCA-motif	CGTCA	342	5	-	Hordeum vulgare	cis-acting regulatory element involved in the MeJA-responsiveness	MeJA response
MsNAC87	CGTCA-motif	CGTCA	613	5	-	Hordeum vulgare	cis-acting regulatory element involved in the MeJA-responsiveness	MeJA response
MsNAC88	TGACG-motif	TGACG	205	5	-	Hordeum vulgare	cis-acting regulatory element involved in the MeJA-responsiveness	MeJA response
MsNAC88	TGACG-motif	TGACG	1065	5	-	Hordeum vulgare	cis-acting regulatory element involved in the MeJA-responsiveness	MeJA response
MsNAC88	TGACG-motif	TGACG	1593	5	-	Hordeum vulgare	cis-acting regulatory element involved in the MeJA-responsiveness	MeJA response
MsNAC88	CGTCA-motif	CGTCA	205	5	+	Hordeum vulgare	cis-acting regulatory element involved in the MeJA-responsiveness	MeJA response
MsNAC88	CGTCA-motif	CGTCA	1065	5	+	Hordeum vulgare	cis-acting regulatory element involved in the MeJA-responsiveness	MeJA response
MsNAC88	CGTCA-motif	CGTCA	1593	5	+	Hordeum vulgare	cis-acting regulatory element involved in the MeJA-responsiveness	MeJA response
MsNAC89	CGTCA-motif	CGTCA	127	5	+	Hordeum vulgare	cis-acting regulatory element involved in the MeJA-responsiveness	MeJA response
MsNAC89	CGTCA-motif	CGTCA	1920	5	-	Hordeum vulgare	cis-acting regulatory element involved in the MeJA-responsiveness	MeJA response
MsNAC89	TGACG-motif	TGACG	127	5	-	Hordeum vulgare	cis-acting regulatory element involved in the MeJA-responsiveness	MeJA response
MsNAC89	TGACG-motif	TGACG	1920	5	+	Hordeum vulgare	cis-acting regulatory element involved in the MeJA-responsiveness	MeJA response
MsNAC90	TGACG-motif	TGACG	972	5	+	Hordeum vulgare	cis-acting regulatory element involved in the MeJA-responsiveness	MeJA response
MsNAC90	TGACG-motif	TGACG	1395	5	-	Hordeum vulgare	cis-acting regulatory element involved in the MeJA-responsiveness	MeJA response
MsNAC90	TGACG-motif	TGACG	1431	5	+	Hordeum vulgare	cis-acting regulatory element involved in the MeJA-responsiveness	MeJA response
MsNAC90	CGTCA-motif	CGTCA	972	5	-	Hordeum vulgare	cis-acting regulatory element involved in the MeJA-responsiveness	MeJA response
MsNAC90	CGTCA-motif	CGTCA	1395	5	+	Hordeum vulgare	cis-acting regulatory element involved in the MeJA-responsiveness	MeJA response
MsNAC90	CGTCA-motif	CGTCA	1431	5	-	Hordeum vulgare	cis-acting regulatory element involved in the MeJA-responsiveness	MeJA response
MsNAC91	TGACG-motif	TGACG	866	5	+	Hordeum vulgare	cis-acting regulatory element involved in the MeJA-responsiveness	MeJA response
MsNAC91	CGTCA-motif	CGTCA	866	5	-	Hordeum vulgare	cis-acting regulatory element involved in the MeJA-responsiveness	MeJA response
MsNAC92	TGACG-motif	TGACG	1125	5	+	Hordeum vulgare	cis-acting regulatory element involved in the MeJA-responsiveness	MeJA response
MsNAC92	CGTCA-motif	CGTCA	1125	5	-	Hordeum vulgare	cis-acting regulatory element involved in the MeJA-responsiveness	MeJA response
MsNAC93	TGACG-motif	TGACG	1290	5	+	Hordeum vulgare	cis-acting regulatory element involved in the MeJA-responsiveness	MeJA response
MsNAC93	TGACG-motif	TGACG	1641	5	-	Hordeum vulgare	cis-acting regulatory element involved in the MeJA-responsiveness	MeJA response
MsNAC93	CGTCA-motif	CGTCA	1290	5	-	Hordeum vulgare	cis-acting regulatory element involved in the MeJA-responsiveness	MeJA response
MsNAC93	CGTCA-motif	CGTCA	1641	5	+	Hordeum vulgare	cis-acting regulatory element involved in the MeJA-responsiveness	MeJA response
MsNAC94	CGTCA-motif	CGTCA	433	5	+	Hordeum vulgare	cis-acting regulatory element involved in the MeJA-responsiveness	MeJA response
MsNAC94	CGTCA-motif	CGTCA	688	5	-	Hordeum vulgare	cis-acting regulatory element involved in the MeJA-responsiveness	MeJA response
MsNAC94	CGTCA-motif	CGTCA	914	5	+	Hordeum vulgare	cis-acting regulatory element involved in the MeJA-responsiveness	MeJA response
MsNAC94	TGACG-motif	TGACG	433	5	-	Hordeum vulgare	cis-acting regulatory element involved in the MeJA-responsiveness	MeJA response
MsNAC94	TGACG-motif	TGACG	688	5	+	Hordeum vulgare	cis-acting regulatory element involved in the MeJA-responsiveness	MeJA response
MsNAC94	TGACG-motif	TGACG	914	5	-	Hordeum vulgare	cis-acting regulatory element involved in the MeJA-responsiveness	MeJA response
MsNAC95	CGTCA-motif	CGTCA	650	5	-	Hordeum vulgare	cis-acting regulatory element involved in the MeJA-responsiveness	MeJA response
MsNAC95	TGACG-motif	TGACG	650	5	+	Hordeum vulgare	cis-acting regulatory element involved in the MeJA-responsiveness	MeJA response
MsNAC96	TGACG-motif	TGACG	1108	5	-	Hordeum vulgare	cis-acting regulatory element involved in the MeJA-responsiveness	MeJA response
MsNAC96	CGTCA-motif	CGTCA	1108	5	+	Hordeum vulgare	cis-acting regulatory element involved in the MeJA-responsiveness	MeJA response
MsNAC12	LTR	CCGAAA	646	6	+	Hordeum vulgare	cis-acting element involved in low-temperature responsiveness	low-temperature response
MsNAC12	LTR	CCGAAA	1444	6	-	Hordeum vulgare	cis-acting element involved in low-temperature responsiveness	low-temperature response
MsNAC12	LTR	CCGAAA	1596	6	-	Hordeum vulgare	cis-acting element involved in low-temperature responsiveness	low-temperature response
MsNAC13	LTR	CCGAAA	1390	6	-	Hordeum vulgare	cis-acting element involved in low-temperature responsiveness	low-temperature response
MsNAC15	LTR	CCGAAA	881	6	+	Hordeum vulgare	cis-acting element involved in low-temperature responsiveness	low-temperature response
MsNAC16	LTR	CCGAAA	1930	6	+	Hordeum vulgare	cis-acting element involved in low-temperature responsiveness	low-temperature response
MsNAC17	LTR	CCGAAA	1314	6	+	Hordeum vulgare	cis-acting element involved in low-temperature responsiveness	low-temperature response
MsNAC20	LTR	CCGAAA	616	6	-	Hordeum vulgare	cis-acting element involved in low-temperature responsiveness	low-temperature response
MsNAC22	LTR	CCGAAA	1282	6	+	Hordeum vulgare	cis-acting element involved in low-temperature responsiveness	low-temperature response
MsNAC24	LTR	CCGAAA	1633	6	-	Hordeum vulgare	cis-acting element involved in low-temperature responsiveness	low-temperature response
MsNAC24	LTR	CCGAAA	1726	6	+	Hordeum vulgare	cis-acting element involved in low-temperature responsiveness	low-temperature response
MsNAC25	LTR	CCGAAA	1021	6	+	Hordeum vulgare	cis-acting element involved in low-temperature responsiveness	low-temperature response
MsNAC28	LTR	CCGAAA	1222	6	+	Hordeum vulgare	cis-acting element involved in low-temperature responsiveness	low-temperature response
MsNAC29	LTR	CCGAAA	262	6	-	Hordeum vulgare	cis-acting element involved in low-temperature responsiveness	low-temperature response
MsNAC29	LTR	CCGAAA	596	6	-	Hordeum vulgare	cis-acting element involved in low-temperature responsiveness	low-temperature response
MsNAC3	LTR	CCGAAA	361	6	+	Hordeum vulgare	cis-acting element involved in low-temperature responsiveness	low-temperature response
MsNAC3	LTR	CCGAAA	689	6	-	Hordeum vulgare	cis-acting element involved in low-temperature responsiveness	low-temperature response
MsNAC32	LTR	CCGAAA	892	6	+	Hordeum vulgare	cis-acting element involved in low-temperature responsiveness	low-temperature response
MsNAC33	LTR	CCGAAA	345	6	+	Hordeum vulgare	cis-acting element involved in low-temperature responsiveness	low-temperature response
MsNAC35	LTR	CCGAAA	93	6	-	Hordeum vulgare	cis-acting element involved in low-temperature responsiveness	low-temperature response
MsNAC37	LTR	CCGAAA	13	6	-	Hordeum vulgare	cis-acting element involved in low-temperature responsiveness	low-temperature response
MsNAC4	LTR	CCGAAA	129	6	-	Hordeum vulgare	cis-acting element involved in low-temperature responsiveness	low-temperature response
MsNAC4	LTR	CCGAAA	616	6	+	Hordeum vulgare	cis-acting element involved in low-temperature responsiveness	low-temperature response
MsNAC4	LTR	CCGAAA	719	6	-	Hordeum vulgare	cis-acting element involved in low-temperature responsiveness	low-temperature response
MsNAC4	LTR	CCGAAA	960	6	+	Hordeum vulgare	cis-acting element involved in low-temperature responsiveness	low-temperature response
MsNAC4	LTR	CCGAAA	1254	6	-	Hordeum vulgare	cis-acting element involved in low-temperature responsiveness	low-temperature response
MsNAC4	LTR	CCGAAA	1650	6	-	Hordeum vulgare	cis-acting element involved in low-temperature responsiveness	low-temperature response
MsNAC4	LTR	CCGAAA	1694	6	+	Hordeum vulgare	cis-acting element involved in low-temperature responsiveness	low-temperature response
MsNAC4	LTR	CCGAAA	1707	6	+	Hordeum vulgare	cis-acting element involved in low-temperature responsiveness	low-temperature response
MsNAC42	LTR	CCGAAA	442	6	-	Hordeum vulgare	cis-acting element involved in low-temperature responsiveness	low-temperature response
MsNAC45	LTR	CCGAAA	26	6	-	Hordeum vulgare	cis-acting element involved in low-temperature responsiveness	low-temperature response
MsNAC47	LTR	CCGAAA	605	6	+	Hordeum vulgare	cis-acting element involved in low-temperature responsiveness	low-temperature response
MsNAC47	LTR	CCGAAA	1930	6	-	Hordeum vulgare	cis-acting element involved in low-temperature responsiveness	low-temperature response
MsNAC53	LTR	CCGAAA	1378	6	-	Hordeum vulgare	cis-acting element involved in low-temperature responsiveness	low-temperature response
MsNAC53	LTR	CCGAAA	1826	6	-	Hordeum vulgare	cis-acting element involved in low-temperature responsiveness	low-temperature response
MsNAC54	LTR	CCGAAA	606	6	-	Hordeum vulgare	cis-acting element involved in low-temperature responsiveness	low-temperature response
MsNAC54	LTR	CCGAAA	1339	6	+	Hordeum vulgare	cis-acting element involved in low-temperature responsiveness	low-temperature response
MsNAC54	LTR	CCGAAA	1368	6	+	Hordeum vulgare	cis-acting element involved in low-temperature responsiveness	low-temperature response
MsNAC56	LTR	CCGAAA	416	6	+	Hordeum vulgare	cis-acting element involved in low-temperature responsiveness	low-temperature response
MsNAC57	LTR	CCGAAA	1614	6	+	Hordeum vulgare	cis-acting element involved in low-temperature responsiveness	low-temperature response
MsNAC57	LTR	CCGAAA	1910	6	+	Hordeum vulgare	cis-acting element involved in low-temperature responsiveness	low-temperature response
MsNAC59	LTR	CCGAAA	151	6	+	Hordeum vulgare	cis-acting element involved in low-temperature responsiveness	low-temperature response
MsNAC59	LTR	CCGAAA	1635	6	-	Hordeum vulgare	cis-acting element involved in low-temperature responsiveness	low-temperature response
MsNAC62	LTR	CCGAAA	117	6	+	Hordeum vulgare	cis-acting element involved in low-temperature responsiveness	low-temperature response
MsNAC63	LTR	CCGAAA	1712	6	+	Hordeum vulgare	cis-acting element involved in low-temperature responsiveness	low-temperature response
MsNAC64	LTR	CCGAAA	288	6	+	Hordeum vulgare	cis-acting element involved in low-temperature responsiveness	low-temperature response
MsNAC70	LTR	CCGAAA	1561	6	+	Hordeum vulgare	cis-acting element involved in low-temperature responsiveness	low-temperature response
MsNAC71	LTR	CCGAAA	1395	6	-	Hordeum vulgare	cis-acting element involved in low-temperature responsiveness	low-temperature response
MsNAC73	LTR	CCGAAA	84	6	-	Hordeum vulgare	cis-acting element involved in low-temperature responsiveness	low-temperature response
MsNAC78	LTR	CCGAAA	190	6	+	Hordeum vulgare	cis-acting element involved in low-temperature responsiveness	low-temperature response
MsNAC79	LTR	CCGAAA	913	6	+	Hordeum vulgare	cis-acting element involved in low-temperature responsiveness	low-temperature response
MsNAC79	LTR	CCGAAA	1562	6	+	Hordeum vulgare	cis-acting element involved in low-temperature responsiveness	low-temperature response
MsNAC8	LTR	CCGAAA	1614	6	-	Hordeum vulgare	cis-acting element involved in low-temperature responsiveness	low-temperature response
MsNAC84	LTR	CCGAAA	673	6	+	Hordeum vulgare	cis-acting element involved in low-temperature responsiveness	low-temperature response
MsNAC84	LTR	CCGAAA	1079	6	+	Hordeum vulgare	cis-acting element involved in low-temperature responsiveness	low-temperature response
MsNAC85	LTR	CCGAAA	1971	6	-	Hordeum vulgare	cis-acting element involved in low-temperature responsiveness	low-temperature response
MsNAC85	LTR	CCGAAA	1980	6	+	Hordeum vulgare	cis-acting element involved in low-temperature responsiveness	low-temperature response
MsNAC90	LTR	CCGAAA	249	6	-	Hordeum vulgare	cis-acting element involved in low-temperature responsiveness	low-temperature response
MsNAC90	LTR	CCGAAA	1501	6	-	Hordeum vulgare	cis-acting element involved in low-temperature responsiveness	low-temperature response
MsNAC91	LTR	CCGAAA	1369	6	-	Hordeum vulgare	cis-acting element involved in low-temperature responsiveness	low-temperature response
MsNAC92	LTR	CCGAAA	1807	6	+	Hordeum vulgare	cis-acting element involved in low-temperature responsiveness	low-temperature response
MsNAC94	LTR	CCGAAA	845	6	+	Hordeum vulgare	cis-acting element involved in low-temperature responsiveness	low-temperature response
MsNAC96	LTR	CCGAAA	1865	6	+	Hordeum vulgare	cis-acting element involved in low-temperature responsiveness	low-temperature response
MsNAC13	AE-box	AGAAACTT	2	8	-	Arabidopsis thaliana	part of a module for light response	light response
MsNAC17	AE-box	AGAAACTT	1517	8	-	Arabidopsis thaliana	part of a module for light response	light response
MsNAC19	AE-box	AGAAACTT	823	8	-	Arabidopsis thaliana	part of a module for light response	light response
MsNAC20	AE-box	AGAAACTT	54	8	-	Arabidopsis thaliana	part of a module for light response	light response
MsNAC22	AE-box	AGAAACTT	1965	8	+	Arabidopsis thaliana	part of a module for light response	light response
MsNAC24	AE-box	AGAAACAA	142	8	-	Arabidopsis thaliana	part of a module for light response	light response
MsNAC28	AE-box	AGAAACTT	1691	8	-	Arabidopsis thaliana	part of a module for light response	light response
MsNAC29	AE-box	AGAAACAA	475	8	-	Arabidopsis thaliana	part of a module for light response	light response
MsNAC33	AE-box	AGAAACTT	215	8	-	Arabidopsis thaliana	part of a module for light response	light response
MsNAC34	AE-box	AGAAACAA	1389	8	-	Arabidopsis thaliana	part of a module for light response	light response
MsNAC35	AE-box	AGAAACAA	190	8	+	Arabidopsis thaliana	part of a module for light response	light response
MsNAC36	AE-box	AGAAACTT	243	8	-	Arabidopsis thaliana	part of a module for light response	light response
MsNAC36	AE-box	AGAAACAA	1377	8	+	Arabidopsis thaliana	part of a module for light response	light response
MsNAC37	AE-box	AGAAACAA	1636	8	-	Arabidopsis thaliana	part of a module for light response	light response
MsNAC39	AE-box	AGAAACAA	675	8	-	Arabidopsis thaliana	part of a module for light response	light response
MsNAC42	AE-box	AGAAACAA	96	8	-	Arabidopsis thaliana	part of a module for light response	light response
MsNAC42	AE-box	AGAAACTT	1457	8	-	Arabidopsis thaliana	part of a module for light response	light response
MsNAC44	AE-box	AGAAACAA	202	8	+	Arabidopsis thaliana	part of a module for light response	light response
MsNAC47	AE-box	AGAAACTT	1871	8	+	Arabidopsis thaliana	part of a module for light response	light response
MsNAC51	AE-box	AGAAACTT	1785	8	-	Arabidopsis thaliana	part of a module for light response	light response
MsNAC59	AE-box	AGAAACAA	676	8	+	Arabidopsis thaliana	part of a module for light response	light response
MsNAC64	AE-box	AGAAACTT	319	8	+	Arabidopsis thaliana	part of a module for light response	light response
MsNAC66	AE-box	AGAAACAA	608	8	-	Arabidopsis thaliana	part of a module for light response	light response
MsNAC66	AE-box	AGAAACAA	695	8	-	Arabidopsis thaliana	part of a module for light response	light response
MsNAC7	AE-box	AGAAACAA	913	8	+	Arabidopsis thaliana	part of a module for light response	light response
MsNAC72	AE-box	AGAAACAA	1076	8	+	Arabidopsis thaliana	part of a module for light response	light response
MsNAC73	AE-box	AGAAACTT	1435	8	+	Arabidopsis thaliana	part of a module for light response	light response
MsNAC74	AE-box	AGAAACAA	964	8	+	Arabidopsis thaliana	part of a module for light response	light response
MsNAC77	AE-box	AGAAACAA	1419	8	-	Arabidopsis thaliana	part of a module for light response	light response
MsNAC78	AE-box	AGAAACAA	1479	8	+	Arabidopsis thaliana	part of a module for light response	light response
MsNAC80	AE-box	AGAAACAA	552	8	+	Arabidopsis thaliana	part of a module for light response	light response
MsNAC85	AE-box	AGAAACAA	1016	8	+	Arabidopsis thaliana	part of a module for light response	light response
MsNAC86	AE-box	AGAAACTT	485	8	+	Arabidopsis thaliana	part of a module for light response	light response
MsNAC87	AE-box	AGAAACTT	874	8	+	Arabidopsis thaliana	part of a module for light response	light response
MsNAC9	AE-box	AGAAACTT	1733	8	+	Arabidopsis thaliana	part of a module for light response	light response
MsNAC94	AE-box	AGAAACTT	1439	8	+	Arabidopsis thaliana	part of a module for light response	light response
MsNAC53	AT1-motif	AATTATTTTTTATT	556	14	+	Solanum tuberosum	part of a light responsive module	light response
MsNAC62	AT1-motif	AATTATTTTTTATT	1093	13	-	Solanum tuberosum	part of a light responsive module	light response
MsNAC65	AT1-motif	AATTATTTTTTATT	620	13	-	Solanum tuberosum	part of a light responsive module	light response
MsNAC85	AT1-motif	AATTATTTTTTATT	325	13	+	Solanum tuberosum	part of a light responsive module	light response
MsNAC1	I-box	TGATAATGT	1871	9	-	Solanum tuberosum	part of a light responsive element	light response
MsNAC14	chs-Unit 1 m1	ACCTAACCCGC	612	10	-	Hordeum vulgare	part of a light responsive element	light response
MsNAC15	GATA-motif	GATAGGG	166	7	-	Pisum sativum	part of a light responsive element	light response
MsNAC15	I-box	cCATATCCAAT	166	10	+	Flaveria trinervia	part of a light responsive element	light response
MsNAC15	chs-CMA2b	GAACCTACACAC	897	11	+	Hordeum vulgare	part of a light responsive element	light response
MsNAC16	TCCC-motif	TCTCCCT	271	7	+	Spinacia oleracea	part of a light responsive element	light response
MsNAC16	GATA-motif	GATAGGA	831	7	+	Arabidopsis thaliana	part of a light responsive element	light response
MsNAC17	I-box	gGATAAGGTG	702	9	+	Zea mays	part of a light responsive element	light response
MsNAC17	TCT-motif	TCTTAC	1522	6	+	Arabidopsis thaliana	part of a light responsive element	light response
MsNAC19	Box II	CCACGTGGC	1882	9	-	Petroselinum crispum	part of a light responsive element	light response
MsNAC19	I-box	TGATAATGT	1490	9	-	Solanum tuberosum	part of a light responsive element	light response
MsNAC19	TCT-motif	TCTTAC	220	6	+	Arabidopsis thaliana	part of a light responsive element	light response
MsNAC19	TCT-motif	TCTTAC	1407	6	+	Arabidopsis thaliana	part of a light responsive element	light response
MsNAC2	chs-CMA2c	ATATACGTGAAGG	1747	12	-	Daucus carota	part of a light responsive element	light response
MsNAC2	TCCC-motif	TCTCCCT	1171	7	+	Spinacia oleracea	part of a light responsive element	light response
MsNAC20	chs-CMA2a	TCACTTGA	92	8	-	Petroselinum crispum	part of a light responsive element	light response
MsNAC20	TCCC-motif	TCTCCCT	3	7	+	Spinacia oleracea	part of a light responsive element	light response
MsNAC20	GTGGC-motif	CATCGTGTGGC	295	10	-	Arabidopsis thaliana	part of a light responsive element	light response
MsNAC21	chs-CMA1a	TTACTTAA	1769	8	-	Daucus carota	part of a light responsive element	light response
MsNAC22	I-box	atGATAAGGTC	1044	10	+	Helianthus annuus	part of a light responsive element	light response
MsNAC22	chs-CMA2a	TCACTTGA	1927	8	+	Petroselinum crispum	part of a light responsive element	light response
MsNAC22	GTGGC-motif	CATCGTGTGGC	1717	10	+	Arabidopsis thaliana	part of a light responsive element	light response
MsNAC24	chs-CMA2a	TCACTTGA	7	8	-	Petroselinum crispum	part of a light responsive element	light response
MsNAC24	I-box	gGATAAGGTG	1438	9	+	Zea mays	part of a light responsive element	light response
MsNAC24	TCCC-motif	TCTCCCT	1329	7	-	Spinacia oleracea	part of a light responsive element	light response
MsNAC24	TCCC-motif	TCTCCCT	1501	7	-	Spinacia oleracea	part of a light responsive element	light response
MsNAC24	TCCC-motif	TCTCCCT	1523	7	-	Spinacia oleracea	part of a light responsive element	light response
MsNAC24	TCCC-motif	TCTCCCT	1536	7	-	Spinacia oleracea	part of a light responsive element	light response
MsNAC24	TCCC-motif	TCTCCCT	1553	7	-	Spinacia oleracea	part of a light responsive element	light response
MsNAC24	TCCC-motif	TCTCCCT	1987	7	+	Spinacia oleracea	part of a light responsive element	light response
MsNAC24	TCT-motif	TCTTAC	1312	6	-	Arabidopsis thaliana	part of a light responsive element	light response
MsNAC24	TCT-motif	TCTTAC	1531	6	-	Arabidopsis thaliana	part of a light responsive element	light response
MsNAC24	TCT-motif	TCTTAC	1585	6	-	Arabidopsis thaliana	part of a light responsive element	light response
MsNAC24	TCT-motif	TCTTAC	1839	6	-	Arabidopsis thaliana	part of a light responsive element	light response
MsNAC25	chs-CMA2a	TCACTTGA	1228	8	-	Petroselinum crispum	part of a light responsive element	light response
MsNAC25	TCT-motif	TCTTAC	233	6	+	Arabidopsis thaliana	part of a light responsive element	light response
MsNAC25	Gap-box	CAAATGAA(A/G)A	303	9.5	-	Arabidopsis thaliana	part of a light responsive element	light response
MsNAC25	GATA-motif	AAGGATAAGG	329	9	-	Solanum tuberosum	part of a light responsive element	light response
MsNAC25	GATA-motif	GATAGGG	1049	7	+	Pisum sativum	part of a light responsive element	light response
MsNAC25	GATA-motif	AAGATAAGATT	1172	10	-	Arabidopsis thaliana	part of a light responsive element	light response
MsNAC26	TCT-motif	TCTTAC	96	6	+	Arabidopsis thaliana	part of a light responsive element	light response
MsNAC27	chs-CMA2a	TCACTTGA	298	8	+	Petroselinum crispum	part of a light responsive element	light response
MsNAC28	TCT-motif	TCTTAC	1538	6	+	Arabidopsis thaliana	part of a light responsive element	light response
MsNAC29	TCT-motif	TCTTAC	685	6	+	Arabidopsis thaliana	part of a light responsive element	light response
MsNAC29	TCT-motif	TCTTAC	1235	6	+	Arabidopsis thaliana	part of a light responsive element	light response
MsNAC29	Gap-box	CAAATGAA(A/G)A	1832	9.5	-	Arabidopsis thaliana	part of a light responsive element	light response
MsNAC3	GATA-motif	AAGATAAGATT	456	10	-	Arabidopsis thaliana	part of a light responsive element	light response
MsNAC3	GATA-motif	GATAGGG	1773	7	+	Pisum sativum	part of a light responsive element	light response
MsNAC30	Pc-CMA2c	GCCCACGCA	1673	9	+	Pisum sativum	part of a light responsive element	light response
MsNAC30	Pc-CMA2c	GCCCACGCA	1721	9	+	Pisum sativum	part of a light responsive element	light response
MsNAC30	GTGGC-motif	CATCGTGTGGC	1156	10	-	Arabidopsis thaliana	part of a light responsive element	light response
MsNAC30	GATT-motif	CTCCTGATTGGA	675	11	+	Oryza sativa	part of a light responsive element	light response
MsNAC30	LAMP-element	CCTTATCCA	1229	9	-	Spinacia oleracea	part of a light responsive element	light response
MsNAC30	GATA-motif	GATAGGA	1980	7	+	Arabidopsis thaliana	part of a light responsive element	light response
MsNAC30	Box II	CCACGTGGC	1317	9	-	Petroselinum crispum	part of a light responsive element	light response
MsNAC31	chs-CMA2a	TCACTTGA	544	8	+	Petroselinum crispum	part of a light responsive element	light response
MsNAC31	TCT-motif	TCTTAC	1673	6	-	Arabidopsis thaliana	part of a light responsive element	light response
MsNAC31	GATA-motif	GATAGGG	962	7	-	Pisum sativum	part of a light responsive element	light response
MsNAC31	GATA-motif	AAGATAAGATT	1383	10	-	Arabidopsis thaliana	part of a light responsive element	light response
MsNAC31	GATA-motif	GATAGGG	1916	7	-	Pisum sativum	part of a light responsive element	light response
MsNAC31	Gap-box	CAAATGAA(A/G)A	1988	9.5	-	Arabidopsis thaliana	part of a light responsive element	light response
MsNAC31	I-box	TGATAATGT	1423	9	-	Solanum tuberosum	part of a light responsive element	light response
MsNAC33	GTGGC-motif	GATTCTGTGGC	432	10	-	Spinacia oleracea	part of a light responsive element	light response
MsNAC33	LAMP-element	CTTTATCA	180	8	+	Pisum sativum	part of a light responsive element	light response
MsNAC33	Gap-box	CAAATGAA(A/G)A	1080	9	-	Arabidopsis thaliana	part of a light responsive element	light response
MsNAC33	GATA-motif	AAGATAAGATT	9	10	-	Arabidopsis thaliana	part of a light responsive element	light response
MsNAC33	GATA-motif	GATAGGA	666	7	+	Arabidopsis thaliana	part of a light responsive element	light response
MsNAC33	chs-CMA2a	TCACTTGA	604	8	+	Petroselinum crispum	part of a light responsive element	light response
MsNAC34	TCCC-motif	TCTCCCT	97	7	-	Spinacia oleracea	part of a light responsive element	light response
MsNAC34	GATA-motif	GATAGGA	1606	7	-	Arabidopsis thaliana	part of a light responsive element	light response
MsNAC35	GATA-motif	GATAGGA	59	7	+	Arabidopsis thaliana	part of a light responsive element	light response
MsNAC35	TCT-motif	TCTTAC	1131	6	-	Arabidopsis thaliana	part of a light responsive element	light response
MsNAC36	I-box	AAGATAAGGCT	502	10	-	Gossypium hirsutum	part of a light responsive element	light response
MsNAC36	I-box	TAGATAACC	1447	9	+	Pisum sativum	part of a light responsive element	light response
MsNAC36	TCCC-motif	TCTCCCT	1862	7	+	Spinacia oleracea	part of a light responsive element	light response
MsNAC37	GA-motif	ATAGATAA	1281	8	+	Arabidopsis thaliana	part of a light responsive element	light response
MsNAC37	chs-CMA1a	TTACTTAA	1819	8	-	Daucus carota	part of a light responsive element	light response
MsNAC37	TCT-motif	TCTTAC	1910	6	+	Arabidopsis thaliana	part of a light responsive element	light response
MsNAC37	TCCC-motif	TCTCCCT	774	7	-	Spinacia oleracea	part of a light responsive element	light response
MsNAC38	TCT-motif	TCTTAC	400	6	+	Arabidopsis thaliana	part of a light responsive element	light response
MsNAC38	TCT-motif	TCTTAC	1879	6	+	Arabidopsis thaliana	part of a light responsive element	light response
MsNAC4	GTGGC-motif	CATCGTGTGGC	1020	10	+	Arabidopsis thaliana	part of a light responsive element	light response
MsNAC4	GATA-motif	AAGGATAAGG	1311	9	-	Solanum tuberosum	part of a light responsive element	light response
MsNAC40	TCCC-motif	TCTCCCT	877	7	+	Spinacia oleracea	part of a light responsive element	light response
MsNAC40	TCCC-motif	TCTCCCT	1873	7	-	Spinacia oleracea	part of a light responsive element	light response
MsNAC40	LAMP-element	CTTTATCA	1820	8	+	Pisum sativum	part of a light responsive element	light response
MsNAC41	TCT-motif	TCTTAC	353	6	+	Arabidopsis thaliana	part of a light responsive element	light response
MsNAC42	chs-CMA2c	ATATACGTGAAGG	188	12	-	Daucus carota	part of a light responsive element	light response
MsNAC42	TCCC-motif	TCTCCCT	360	7	+	Spinacia oleracea	part of a light responsive element	light response
MsNAC42	TCT-motif	TCTTAC	724	6	+	Arabidopsis thaliana	part of a light responsive element	light response
MsNAC43	TCCC-motif	TCTCCCT	43	7	+	Spinacia oleracea	part of a light responsive element	light response
MsNAC43	TCCC-motif	TCTCCCT	1756	7	+	Spinacia oleracea	part of a light responsive element	light response
MsNAC43	L-box	ATCCCACCTAC	1650	10	+	Petroselinum crispum	part of a light responsive element	light response
MsNAC43	GATA-motif	GATAGGG	113	7	-	Pisum sativum	part of a light responsive element	light response
MsNAC43	GATA-motif	GATAGGA	253	7	+	Arabidopsis thaliana	part of a light responsive element	light response
MsNAC43	GATA-motif	GATAGGG	1759	7	-	Pisum sativum	part of a light responsive element	light response
MsNAC44	TCT-motif	TCTTAC	62	6	+	Arabidopsis thaliana	part of a light responsive element	light response
MsNAC44	GTGGC-motif	GATTCTGTGGC	1264	10	+	Spinacia oleracea	part of a light responsive element	light response
MsNAC44	GATA-motif	AAGGATAAGG	456	9	+	Solanum tuberosum	part of a light responsive element	light response
MsNAC45	GATA-motif	GATAGGG	522	7	-	Pisum sativum	part of a light responsive element	light response
MsNAC45	GATA-motif	GATAGGA	1174	7	+	Arabidopsis thaliana	part of a light responsive element	light response
MsNAC45	GATA-motif	GATAGGA	1747	7	-	Arabidopsis thaliana	part of a light responsive element	light response
MsNAC45	I-box	atGATAAGGTC	678	10	-	Helianthus annuus	part of a light responsive element	light response
MsNAC45	I-box	gGATAAGGTG	912	9	+	Zea mays	part of a light responsive element	light response
MsNAC45	I-box	gGATAAGGTG	934	9	-	Zea mays	part of a light responsive element	light response
MsNAC45	TCT-motif	TCTTAC	721	6	+	Arabidopsis thaliana	part of a light responsive element	light response
MsNAC46	TCCC-motif	TCTCCCT	497	7	+	Spinacia oleracea	part of a light responsive element	light response
MsNAC46	TCCC-motif	TCTCCCT	1459	7	-	Spinacia oleracea	part of a light responsive element	light response
MsNAC46	Box II	TGGTAATAA	889	9	-	Solanum tuberosum	part of a light responsive element	light response
MsNAC46	GATA-motif	AAGATAAGATT	373	10	+	Arabidopsis thaliana	part of a light responsive element	light response
MsNAC46	TCT-motif	TCTTAC	1794	6	-	Arabidopsis thaliana	part of a light responsive element	light response
MsNAC46	GA-motif	ATAGATAA	1584	8	+	Arabidopsis thaliana	part of a light responsive element	light response
MsNAC47	I-box	atGATAAGGTC	1475	10	-	Helianthus annuus	part of a light responsive element	light response
MsNAC47	GATA-motif	GATAGGA	280	7	+	Arabidopsis thaliana	part of a light responsive element	light response
MsNAC47	Box II	TGGTAATAA	790	9	-	Solanum tuberosum	part of a light responsive element	light response
MsNAC48	TCT-motif	TCTTAC	1196	6	-	Arabidopsis thaliana	part of a light responsive element	light response
MsNAC49	TCT-motif	TCTTAC	1154	6	+	Arabidopsis thaliana	part of a light responsive element	light response
MsNAC49	TCCC-motif	TCTCCCT	827	7	-	Spinacia oleracea	part of a light responsive element	light response
MsNAC49	I-box	atGATAAGGTC	1311	10	+	Helianthus annuus	part of a light responsive element	light response
MsNAC49	GATA-motif	GATAGGG	335	7	+	Pisum sativum	part of a light responsive element	light response
MsNAC50	GATA-motif	GATAGGA	1510	7	-	Arabidopsis thaliana	part of a light responsive element	light response
MsNAC50	TCT-motif	TCTTAC	1845	6	+	Arabidopsis thaliana	part of a light responsive element	light response
MsNAC50	GA-motif	ATAGATAA	1838	8	-	Arabidopsis thaliana	part of a light responsive element	light response
MsNAC51	chs-CMA1a	TTACTTAA	1089	8	-	Daucus carota	part of a light responsive element	light response
MsNAC51	TCT-motif	TCTTAC	1900	6	+	Arabidopsis thaliana	part of a light responsive element	light response
MsNAC52	LAMP-element	CCTTATCCA	477	9	-	Spinacia oleracea	part of a light responsive element	light response
MsNAC52	TCT-motif	TCTTAC	660	6	+	Arabidopsis thaliana	part of a light responsive element	light response
MsNAC53	I-box	GTATAAGGCC	1020	9	+	Larix laricina	part of a light responsive element	light response
MsNAC53	TCCC-motif	TCTCCCT	1402	7	-	Spinacia oleracea	part of a light responsive element	light response
MsNAC53	chs-Unit 1 m1	ACCTAACCCGG	11	10	+	Zea mays	part of a light responsive element	light response
MsNAC53	chs-CMA2b	GAACCTACACAC	1125	11	+	Hordeum vulgare	part of a light responsive element	light response
MsNAC53	chs-CMA2a	TCACTTGA	1236	8	-	Petroselinum crispum	part of a light responsive element	light response
MsNAC54	I-box	cCATATCCAAT	413	11	-	Flaveria trinervia	part of a light responsive element	light response
MsNAC54	I-box	gGATAAGGTG	1207	9	+	Zea mays	part of a light responsive element	light response
MsNAC54	GATA-motif	GATAGGG	50	7	-	Pisum sativum	part of a light responsive element	light response
MsNAC54	GATA-motif	GATAGGA	454	7	+	Arabidopsis thaliana	part of a light responsive element	light response
MsNAC54	TCT-motif	TCTTAC	91	6	-	Arabidopsis thaliana	part of a light responsive element	light response
MsNAC55	LAMP-element	CCTTATCCA	13	9	-	Spinacia oleracea	part of a light responsive element	light response
MsNAC55	I-box	gGATAAGGTG	1817	9	-	Zea mays	part of a light responsive element	light response
MsNAC55	GATA-motif	AAGGATAAGG	12	9	+	Solanum tuberosum	part of a light responsive element	light response
MsNAC55	GATA-motif	AAGGATAAGG	1169	9	+	Solanum tuberosum	part of a light responsive element	light response
MsNAC55	GATA-motif	AAGGATAAGG	1819	9	-	Solanum tuberosum	part of a light responsive element	light response
MsNAC56	chs-CMA2a	TCACTTGA	1254	8	-	Petroselinum crispum	part of a light responsive element	light response
MsNAC56	GATA-motif	GATAGGG	1950	7	+	Pisum sativum	part of a light responsive element	light response
MsNAC57	I-box	cCATATCCAAT	1356	10	+	Flaveria trinervia	part of a light responsive element	light response
MsNAC57	I-box	atGATAAGGTC	1642	10	+	Helianthus annuus	part of a light responsive element	light response
MsNAC57	TCT-motif	TCTTAC	1838	6	-	Arabidopsis thaliana	part of a light responsive element	light response
MsNAC57	L-box	ATCCCACCTAC	1420	10	-	Petroselinum crispum	part of a light responsive element	light response
MsNAC58	I-box	GTATAAGGCC	513	9	-	Larix laricina	part of a light responsive element	light response
MsNAC58	TCCC-motif	TCTCCCT	75	7	-	Spinacia oleracea	part of a light responsive element	light response
MsNAC58	TCCC-motif	TCTCCCT	1366	7	+	Spinacia oleracea	part of a light responsive element	light response
MsNAC58	GTGGC-motif	CATCGTGTGGC	1464	10	-	Arabidopsis thaliana	part of a light responsive element	light response
MsNAC59	chs-Unit 1 m1	ACCTAACCCGC	241	10	+	Hordeum vulgare	part of a light responsive element	light response
MsNAC59	TCCC-motif	TCTCCCT	219	7	+	Spinacia oleracea	part of a light responsive element	light response
MsNAC59	TCCC-motif	TCTCCCT	1074	7	+	Spinacia oleracea	part of a light responsive element	light response
MsNAC59	TCT-motif	TCTTAC	1840	6	+	Arabidopsis thaliana	part of a light responsive element	light response
MsNAC6	chs-CMA2a	TCACTTGA	485	8	-	Petroselinum crispum	part of a light responsive element	light response
MsNAC6	TCT-motif	TCTTAC	1009	6	+	Arabidopsis thaliana	part of a light responsive element	light response
MsNAC6	TCT-motif	TCTTAC	1360	6	+	Arabidopsis thaliana	part of a light responsive element	light response
MsNAC60	I-box	AGATAAGG	1877	8	-	Triticum aestivum	part of a light responsive element	light response
MsNAC60	GATA-motif	AAGGATAAGG	903	9	-	Solanum tuberosum	part of a light responsive element	light response
MsNAC61	TCCC-motif	TCTCCCT	1449	7	-	Spinacia oleracea	part of a light responsive element	light response
MsNAC61	TCCC-motif	TCTCCCT	1718	7	-	Spinacia oleracea	part of a light responsive element	light response
MsNAC62	TCT-motif	TCTTAC	656	6	-	Arabidopsis thaliana	part of a light responsive element	light response
MsNAC62	chs-Unit 1 m1	ACCTAACCCGC	1655	10	+	Hordeum vulgare	part of a light responsive element	light response
MsNAC62	TCCC-motif	TCTCCCT	1427	7	-	Spinacia oleracea	part of a light responsive element	light response
MsNAC62	I-box	gGATAAGGTG	1401	9	+	Zea mays	part of a light responsive element	light response
MsNAC62	I-box	gGATAAGGTG	1654	9	-	Zea mays	part of a light responsive element	light response
MsNAC63	LAMP-element	CTTTATCA	761	8	+	Pisum sativum	part of a light responsive element	light response
MsNAC63	GA-motif	ATAGATAA	918	8	+	Arabidopsis thaliana	part of a light responsive element	light response
MsNAC64	GATA-motif	GATAGGA	241	7	+	Arabidopsis thaliana	part of a light responsive element	light response
MsNAC64	TCCC-motif	TCTCCCT	476	7	+	Spinacia oleracea	part of a light responsive element	light response
MsNAC65	GATA-motif	GATAGGA	364	7	+	Arabidopsis thaliana	part of a light responsive element	light response
MsNAC65	GATA-motif	AAGGATAAGG	1131	9	-	Solanum tuberosum	part of a light responsive element	light response
MsNAC65	LAMP-element	CCTTATCCA	1131	9	+	Spinacia oleracea	part of a light responsive element	light response
MsNAC65	chs-CMA2a	TCACTTGA	827	8	+	Petroselinum crispum	part of a light responsive element	light response
MsNAC66	TCT-motif	TCTTAC	276	6	-	Arabidopsis thaliana	part of a light responsive element	light response
MsNAC66	TCT-motif	TCTTAC	1312	6	-	Arabidopsis thaliana	part of a light responsive element	light response
MsNAC66	I-box	AAGATAAGGCT	402	10	+	Gossypium hirsutum	part of a light responsive element	light response
MsNAC67	GA-motif	ATAGATAA	40	8	-	Arabidopsis thaliana	part of a light responsive element	light response
MsNAC67	GTGGC-motif	GATTCTGTGGC	1929	10	+	Spinacia oleracea	part of a light responsive element	light response
MsNAC68	chs-CMA2a	TCACTTGA	1572	8	+	Petroselinum crispum	part of a light responsive element	light response
MsNAC69	I-box	atGATAAGGTC	1871	10	+	Helianthus annuus	part of a light responsive element	light response
MsNAC69	TCT-motif	TCTTAC	1207	6	-	Arabidopsis thaliana	part of a light responsive element	light response
MsNAC7	TCT-motif	TCTTAC	112	6	+	Arabidopsis thaliana	part of a light responsive element	light response
MsNAC7	Gap-box	CAAATGAA(A/G)A	1807	9.5	-	Arabidopsis thaliana	part of a light responsive element	light response
MsNAC70	GATA-motif	AAGGATAAGG	43	9	-	Solanum tuberosum	part of a light responsive element	light response
MsNAC70	chs-CMA2a	TCACTTGA	1613	8	-	Petroselinum crispum	part of a light responsive element	light response
MsNAC71	TCT-motif	TCTTAC	324	6	+	Arabidopsis thaliana	part of a light responsive element	light response
MsNAC71	TCCC-motif	TCTCCCT	83	7	-	Spinacia oleracea	part of a light responsive element	light response
MsNAC71	I-box	TAGATAACC	965	9	-	Pisum sativum	part of a light responsive element	light response
MsNAC71	I-box	gGATAAGGTG	1748	9	-	Zea mays	part of a light responsive element	light response
MsNAC71	GA-motif	ATAGATAA	967	8	-	Arabidopsis thaliana	part of a light responsive element	light response
MsNAC71	chs-CMA2a	TCACTTGA	1927	8	-	Petroselinum crispum	part of a light responsive element	light response
MsNAC72	TCT-motif	TCTTAC	397	6	-	Arabidopsis thaliana	part of a light responsive element	light response
MsNAC72	GATA-motif	GATAGGA	1098	7	-	Arabidopsis thaliana	part of a light responsive element	light response
MsNAC73	chs-CMA2a	TCACTTGA	1346	8	+	Petroselinum crispum	part of a light responsive element	light response
MsNAC73	GATA-motif	AAGATAAGATT	1034	10	+	Arabidopsis thaliana	part of a light responsive element	light response
MsNAC73	I-box	AAGATAAGGCT	1833	10	+	Gossypium hirsutum	part of a light responsive element	light response
MsNAC73	TCT-motif	TCTTAC	1132	6	-	Arabidopsis thaliana	part of a light responsive element	light response
MsNAC74	TCT-motif	TCTTAC	842	6	+	Arabidopsis thaliana	part of a light responsive element	light response
MsNAC74	GATA-motif	AAGGATAAGG	221	9	-	Solanum tuberosum	part of a light responsive element	light response
MsNAC77	I-box	GTATAAGGCC	159	9	-	Larix laricina	part of a light responsive element	light response
MsNAC77	chs-Unit 1 m1	ACCTAACCCGG	1897	10	+	Zea mays	part of a light responsive element	light response
MsNAC77	GTGGC-motif	CATCGTGTGGC	1284	10	+	Arabidopsis thaliana	part of a light responsive element	light response
MsNAC77	TCT-motif	TCTTAC	676	6	+	Arabidopsis thaliana	part of a light responsive element	light response
MsNAC78	chs-CMA2a	TCACTTGA	1087	8	-	Petroselinum crispum	part of a light responsive element	light response
MsNAC78	GATA-motif	GATAGGA	1241	7	-	Arabidopsis thaliana	part of a light responsive element	light response
MsNAC78	GATA-motif	AAGATAAGATT	1693	10	-	Arabidopsis thaliana	part of a light responsive element	light response
MsNAC78	GATA-motif	GATAGGG	1777	7	-	Pisum sativum	part of a light responsive element	light response
MsNAC78	LAMP-element	CTTTATCA	331	8	-	Pisum sativum	part of a light responsive element	light response
MsNAC78	TCT-motif	TCTTAC	546	6	+	Arabidopsis thaliana	part of a light responsive element	light response
MsNAC79	LAMP-element	CTTTATCA	1681	8	-	Pisum sativum	part of a light responsive element	light response
MsNAC79	Gap-box	CAAATGAA(A/G)A	338	9	+	Arabidopsis thaliana	part of a light responsive element	light response
MsNAC79	GATT-motif	CTCCTGATTGGA	147	11	+	Oryza sativa	part of a light responsive element	light response
MsNAC79	TCCC-motif	TCTCCCT	1044	7	-	Spinacia oleracea	part of a light responsive element	light response
MsNAC8	TCT-motif	TCTTAC	178	6	+	Arabidopsis thaliana	part of a light responsive element	light response
MsNAC8	I-box	AGATAAGG	1747	8	-	Triticum aestivum	part of a light responsive element	light response
MsNAC80	TCCC-motif	TCTCCCT	901	7	-	Spinacia oleracea	part of a light responsive element	light response
MsNAC80	Gap-box	CAAATGAA(A/G)A	368	9	+	Arabidopsis thaliana	part of a light responsive element	light response
MsNAC81	TCT-motif	TCTTAC	1893	6	+	Arabidopsis thaliana	part of a light responsive element	light response
MsNAC84	Pc-CMA2a	CAGCCAATCACAG	1250	12	-	Pisum sativum	part of a light responsive element	light response
MsNAC85	TCT-motif	TCTTAC	757	6	+	Arabidopsis thaliana	part of a light responsive element	light response
MsNAC85	GATA-motif	GATAGGG	1604	7	+	Pisum sativum	part of a light responsive element	light response
MsNAC86	chs-CMA1a	TTACTTAA	1691	8	-	Daucus carota	part of a light responsive element	light response
MsNAC86	chs-Unit 1 m1	ACCTAACCCGC	1637	10	-	Hordeum vulgare	part of a light responsive element	light response
MsNAC86	TCCC-motif	TCTCCCT	42	7	+	Spinacia oleracea	part of a light responsive element	light response
MsNAC87	TCT-motif	TCTTAC	1525	6	+	Arabidopsis thaliana	part of a light responsive element	light response
MsNAC87	I-box	atGATAAGGTC	282	10	-	Helianthus annuus	part of a light responsive element	light response
MsNAC87	I-box	cGATAAGGCG	345	9	-	Zea mays	part of a light responsive element	light response
MsNAC87	I-box	gGATAAGGTG	1376	9	-	Zea mays	part of a light responsive element	light response
MsNAC87	I-box	atGATAAGGTC	1396	10	+	Helianthus annuus	part of a light responsive element	light response
MsNAC87	TCCC-motif	TCTCCCT	1431	7	-	Spinacia oleracea	part of a light responsive element	light response
MsNAC88	GATA-motif	GATAGGA	1779	7	-	Arabidopsis thaliana	part of a light responsive element	light response
MsNAC88	L-box	ATCCCACCTAC	1037	10	-	Petroselinum crispum	part of a light responsive element	light response
MsNAC89	TCT-motif	TCTTAC	1617	6	+	Arabidopsis thaliana	part of a light responsive element	light response
MsNAC9	LAMP-element	CTTTATCA	1044	8	-	Pisum sativum	part of a light responsive element	light response
MsNAC9	I-box	gGATAAGGTG	686	9	+	Zea mays	part of a light responsive element	light response
MsNAC9	I-box	GTATAAGGCC	1184	9	-	Larix laricina	part of a light responsive element	light response
MsNAC9	TCT-motif	TCTTAC	994	6	-	Arabidopsis thaliana	part of a light responsive element	light response
MsNAC90	TCCC-motif	TCTCCCT	1987	7	-	Spinacia oleracea	part of a light responsive element	light response
MsNAC91	chs-CMA2a	TCACTTGA	1021	8	-	Petroselinum crispum	part of a light responsive element	light response
MsNAC92	GATA-motif	GATAGGA	1289	7	+	Arabidopsis thaliana	part of a light responsive element	light response
MsNAC92	TCCC-motif	TCTCCCT	859	7	-	Spinacia oleracea	part of a light responsive element	light response
MsNAC92	TCT-motif	TCTTAC	380	6	-	Arabidopsis thaliana	part of a light responsive element	light response
MsNAC93	LAMP-element	CTTTATCA	539	8	-	Pisum sativum	part of a light responsive element	light response
MsNAC93	L-box	ATCCCACCTAC	200	10	+	Petroselinum crispum	part of a light responsive element	light response
MsNAC93	GATA-motif	AAGGATAAGG	589	9	-	Solanum tuberosum	part of a light responsive element	light response
MsNAC94	TCT-motif	TCTTAC	1280	6	+	Arabidopsis thaliana	part of a light responsive element	light response
MsNAC95	GATA-motif	GATAGGA	1691	7	+	Arabidopsis thaliana	part of a light responsive element	light response
MsNAC95	I-box	TGATAATGT	992	9	-	Solanum tuberosum	part of a light responsive element	light response
MsNAC95	GTGGC-motif	CAGCGTGTGGC	1775	10	-	Hordeum vulgare	part of a light responsive element	light response
MsNAC96	I-box	GTATAAGGCC	1252	9	+	Larix laricina	part of a light responsive element	light response
MsNAC96	TCT-motif	TCTTAC	448	6	+	Arabidopsis thaliana	part of a light responsive element	light response
MsNAC16	CAG-motif	GAAAGGCAGAC	282	10	-	Arabidopsis thaliana	part of a light response element	light response
MsNAC48	CAG-motif	GAAAGGCAGAC	1180	10	+	Arabidopsis thaliana	part of a light response element	light response
MsNAC1	Box 4	ATTAAT	991	6	+	Petroselinum crispum	part of a conserved DNA module involved in light responsiveness	light response
MsNAC1	Box 4	ATTAAT	1015	6	-	Petroselinum crispum	part of a conserved DNA module involved in light responsiveness	light response
MsNAC1	Box 4	ATTAAT	1794	6	-	Petroselinum crispum	part of a conserved DNA module involved in light responsiveness	light response
MsNAC1	Box 4	ATTAAT	1814	6	-	Petroselinum crispum	part of a conserved DNA module involved in light responsiveness	light response
MsNAC12	Box 4	ATTAAT	1003	6	-	Petroselinum crispum	part of a conserved DNA module involved in light responsiveness	light response
MsNAC13	Box 4	ATTAAT	609	6	+	Petroselinum crispum	part of a conserved DNA module involved in light responsiveness	light response
MsNAC15	Box 4	ATTAAT	1200	6	-	Petroselinum crispum	part of a conserved DNA module involved in light responsiveness	light response
MsNAC15	Box 4	ATTAAT	1571	6	-	Petroselinum crispum	part of a conserved DNA module involved in light responsiveness	light response
MsNAC16	Box 4	ATTAAT	37	6	+	Petroselinum crispum	part of a conserved DNA module involved in light responsiveness	light response
MsNAC16	Box 4	ATTAAT	41	6	+	Petroselinum crispum	part of a conserved DNA module involved in light responsiveness	light response
MsNAC16	Box 4	ATTAAT	1829	6	-	Petroselinum crispum	part of a conserved DNA module involved in light responsiveness	light response
MsNAC17	Box 4	ATTAAT	1590	6	-	Petroselinum crispum	part of a conserved DNA module involved in light responsiveness	light response
MsNAC17	ATCT-motif	AATCTAATCC	1411	9	+	Pisum sativum	part of a conserved DNA module involved in light responsiveness	light response
MsNAC18	Box 4	ATTAAT	387	6	+	Petroselinum crispum	part of a conserved DNA module involved in light responsiveness	light response
MsNAC18	Box 4	ATTAAT	1174	6	-	Petroselinum crispum	part of a conserved DNA module involved in light responsiveness	light response
MsNAC18	ATC-motif	AGTAATCT	1638	8	-	Spinacia oleracea	part of a conserved DNA module involved in light responsiveness	light response
MsNAC18	ATCT-motif	AATCTAATCC	1761	9	-	Pisum sativum	part of a conserved DNA module involved in light responsiveness	light response
MsNAC19	ATCT-motif	AATCTAATCC	594	9	-	Pisum sativum	part of a conserved DNA module involved in light responsiveness	light response
MsNAC19	ATCT-motif	AATCTAATCC	1129	9	+	Pisum sativum	part of a conserved DNA module involved in light responsiveness	light response
MsNAC20	Box 4	ATTAAT	1673	6	-	Petroselinum crispum	part of a conserved DNA module involved in light responsiveness	light response
MsNAC20	ATC-motif	AGCTATCCA	1253	9	+	Arabidopsis thaliana	part of a conserved DNA module involved in light responsiveness	light response
MsNAC22	Box 4	ATTAAT	1355	6	-	Petroselinum crispum	part of a conserved DNA module involved in light responsiveness	light response
MsNAC22	ATCT-motif	AATCTAATCC	1033	9	+	Pisum sativum	part of a conserved DNA module involved in light responsiveness	light response
MsNAC24	ATCT-motif	AATCTAATCC	974	9	+	Pisum sativum	part of a conserved DNA module involved in light responsiveness	light response
MsNAC26	ATCT-motif	AATCTAATCC	1748	9	-	Pisum sativum	part of a conserved DNA module involved in light responsiveness	light response
MsNAC29	ATC-motif	TGCTATCCA	581	9	+	Pisum sativum	part of a conserved DNA module involved in light responsiveness	light response
MsNAC3	Box 4	ATTAAT	786	6	+	Petroselinum crispum	part of a conserved DNA module involved in light responsiveness	light response
MsNAC30	ATCT-motif	AATCTAATCC	688	10	-	Pisum sativum	part of a conserved DNA module involved in light responsiveness	light response
MsNAC30	ATCT-motif	AATCTAATCC	1141	10	-	Pisum sativum	part of a conserved DNA module involved in light responsiveness	light response
MsNAC31	ATCT-motif	AATCTAATCC	1734	9	+	Pisum sativum	part of a conserved DNA module involved in light responsiveness	light response
MsNAC31	Box 4	ATTAAT	126	6	+	Petroselinum crispum	part of a conserved DNA module involved in light responsiveness	light response
MsNAC32	Box 4	ATTAAT	1694	6	-	Petroselinum crispum	part of a conserved DNA module involved in light responsiveness	light response
MsNAC32	Box 4	ATTAAT	1796	6	-	Petroselinum crispum	part of a conserved DNA module involved in light responsiveness	light response
MsNAC32	Box 4	ATTAAT	1800	6	-	Petroselinum crispum	part of a conserved DNA module involved in light responsiveness	light response
MsNAC33	ATCT-motif	AATCTAATCC	1893	9	-	Pisum sativum	part of a conserved DNA module involved in light responsiveness	light response
MsNAC35	Box 4	ATTAAT	1768	6	-	Petroselinum crispum	part of a conserved DNA module involved in light responsiveness	light response
MsNAC35	ATCT-motif	AATCTAATCC	1710	9	-	Pisum sativum	part of a conserved DNA module involved in light responsiveness	light response
MsNAC37	ATCT-motif	AATCTAATCC	533	9	-	Pisum sativum	part of a conserved DNA module involved in light responsiveness	light response
MsNAC37	Box 4	ATTAAT	1176	6	-	Petroselinum crispum	part of a conserved DNA module involved in light responsiveness	light response
MsNAC37	Box 4	ATTAAT	1536	6	-	Petroselinum crispum	part of a conserved DNA module involved in light responsiveness	light response
MsNAC37	Box 4	ATTAAT	1602	6	-	Petroselinum crispum	part of a conserved DNA module involved in light responsiveness	light response
MsNAC37	Box 4	ATTAAT	1688	6	-	Petroselinum crispum	part of a conserved DNA module involved in light responsiveness	light response
MsNAC37	Box 4	ATTAAT	1865	6	-	Petroselinum crispum	part of a conserved DNA module involved in light responsiveness	light response
MsNAC38	Box 4	ATTAAT	870	6	+	Petroselinum crispum	part of a conserved DNA module involved in light responsiveness	light response
MsNAC38	Box 4	ATTAAT	1352	6	-	Petroselinum crispum	part of a conserved DNA module involved in light responsiveness	light response
MsNAC43	Box 4	ATTAAT	957	6	+	Petroselinum crispum	part of a conserved DNA module involved in light responsiveness	light response
MsNAC43	Box 4	ATTAAT	1130	6	-	Petroselinum crispum	part of a conserved DNA module involved in light responsiveness	light response
MsNAC43	Box 4	ATTAAT	1313	6	-	Petroselinum crispum	part of a conserved DNA module involved in light responsiveness	light response
MsNAC44	Box 4	ATTAAT	175	6	+	Petroselinum crispum	part of a conserved DNA module involved in light responsiveness	light response
MsNAC45	ATCT-motif	AATCTAATCC	1315	9	-	Pisum sativum	part of a conserved DNA module involved in light responsiveness	light response
MsNAC46	ATCT-motif	AATCTAATCC	1081	9	+	Pisum sativum	part of a conserved DNA module involved in light responsiveness	light response
MsNAC47	Box 4	ATTAAT	873	6	+	Petroselinum crispum	part of a conserved DNA module involved in light responsiveness	light response
MsNAC48	Box 4	ATTAAT	1111	6	-	Petroselinum crispum	part of a conserved DNA module involved in light responsiveness	light response
MsNAC48	Box 4	ATTAAT	1617	6	-	Petroselinum crispum	part of a conserved DNA module involved in light responsiveness	light response
MsNAC48	ATC-motif	TGCTATCCA	296	9	+	Pisum sativum	part of a conserved DNA module involved in light responsiveness	light response
MsNAC49	Box 4	ATTAAT	1988	6	-	Petroselinum crispum	part of a conserved DNA module involved in light responsiveness	light response
MsNAC5	Box 4	ATTAAT	946	6	+	Petroselinum crispum	part of a conserved DNA module involved in light responsiveness	light response
MsNAC50	Box 4	ATTAAT	396	6	+	Petroselinum crispum	part of a conserved DNA module involved in light responsiveness	light response
MsNAC50	Box 4	ATTAAT	829	6	+	Petroselinum crispum	part of a conserved DNA module involved in light responsiveness	light response
MsNAC50	ATCT-motif	AATCTAATCC	378	9	+	Pisum sativum	part of a conserved DNA module involved in light responsiveness	light response
MsNAC50	ATCT-motif	AATCTAATCC	1010	9	-	Pisum sativum	part of a conserved DNA module involved in light responsiveness	light response
MsNAC50	ATCT-motif	AATCTAATCC	1499	9	-	Pisum sativum	part of a conserved DNA module involved in light responsiveness	light response
MsNAC51	Box 4	ATTAAT	48	6	+	Petroselinum crispum	part of a conserved DNA module involved in light responsiveness	light response
MsNAC53	Box 4	ATTAAT	268	6	+	Petroselinum crispum	part of a conserved DNA module involved in light responsiveness	light response
MsNAC53	Box 4	ATTAAT	392	6	+	Petroselinum crispum	part of a conserved DNA module involved in light responsiveness	light response
MsNAC53	ATCT-motif	AATCTAATCC	116	9	+	Pisum sativum	part of a conserved DNA module involved in light responsiveness	light response
MsNAC53	ATCT-motif	AATCTAATCC	1420	9	-	Pisum sativum	part of a conserved DNA module involved in light responsiveness	light response
MsNAC54	Box 4	ATTAAT	497	6	+	Petroselinum crispum	part of a conserved DNA module involved in light responsiveness	light response
MsNAC55	Box 4	ATTAAT	1524	6	-	Petroselinum crispum	part of a conserved DNA module involved in light responsiveness	light response
MsNAC56	ATCT-motif	AATCTAATCC	1435	9	+	Pisum sativum	part of a conserved DNA module involved in light responsiveness	light response
MsNAC57	Box 4	ATTAAT	334	6	+	Petroselinum crispum	part of a conserved DNA module involved in light responsiveness	light response
MsNAC57	Box 4	ATTAAT	661	6	+	Petroselinum crispum	part of a conserved DNA module involved in light responsiveness	light response
MsNAC59	ATC-motif	TGCTATCCG	1190	9	+	Zea mays	part of a conserved DNA module involved in light responsiveness	light response
MsNAC59	ATCT-motif	AATCTAATCC	322	9	-	Pisum sativum	part of a conserved DNA module involved in light responsiveness	light response
MsNAC60	ATC-motif	AGCTATCCA	1768	9	-	Arabidopsis thaliana	part of a conserved DNA module involved in light responsiveness	light response
MsNAC60	Box 4	ATTAAT	1051	6	-	Petroselinum crispum	part of a conserved DNA module involved in light responsiveness	light response
MsNAC61	Box 4	ATTAAT	259	6	+	Petroselinum crispum	part of a conserved DNA module involved in light responsiveness	light response
MsNAC61	Box 4	ATTAAT	970	6	+	Petroselinum crispum	part of a conserved DNA module involved in light responsiveness	light response
MsNAC63	ATCT-motif	AATCTAATCC	57	9	+	Pisum sativum	part of a conserved DNA module involved in light responsiveness	light response
MsNAC64	ATCT-motif	AATCTAATCC	1560	10	+	Pisum sativum	part of a conserved DNA module involved in light responsiveness	light response
MsNAC65	ATC-motif	AGCTATCCA	1476	9	-	Arabidopsis thaliana	part of a conserved DNA module involved in light responsiveness	light response
MsNAC65	ATCT-motif	AATCTAATCC	1164	9	-	Pisum sativum	part of a conserved DNA module involved in light responsiveness	light response
MsNAC66	Box 4	ATTAAT	1107	6	-	Petroselinum crispum	part of a conserved DNA module involved in light responsiveness	light response
MsNAC66	ATC-motif	AGTAATCT	927	8	-	Spinacia oleracea	part of a conserved DNA module involved in light responsiveness	light response
MsNAC68	ATCT-motif	AATCTAATCC	1504	9	-	Pisum sativum	part of a conserved DNA module involved in light responsiveness	light response
MsNAC68	ATCT-motif	AATCTAATCC	1931	9	-	Pisum sativum	part of a conserved DNA module involved in light responsiveness	light response
MsNAC69	Box 4	ATTAAT	365	6	+	Petroselinum crispum	part of a conserved DNA module involved in light responsiveness	light response
MsNAC69	Box 4	ATTAAT	880	6	+	Petroselinum crispum	part of a conserved DNA module involved in light responsiveness	light response
MsNAC7	Box 4	ATTAAT	73	6	+	Petroselinum crispum	part of a conserved DNA module involved in light responsiveness	light response
MsNAC7	Box 4	ATTAAT	567	6	+	Petroselinum crispum	part of a conserved DNA module involved in light responsiveness	light response
MsNAC7	Box 4	ATTAAT	1463	6	-	Petroselinum crispum	part of a conserved DNA module involved in light responsiveness	light response
MsNAC70	Box 4	ATTAAT	1773	6	-	Petroselinum crispum	part of a conserved DNA module involved in light responsiveness	light response
MsNAC71	Box 4	ATTAAT	28	6	+	Petroselinum crispum	part of a conserved DNA module involved in light responsiveness	light response
MsNAC71	Box 4	ATTAAT	194	6	+	Petroselinum crispum	part of a conserved DNA module involved in light responsiveness	light response
MsNAC72	ATC-motif	TGCTATCCA	361	9	-	Pisum sativum	part of a conserved DNA module involved in light responsiveness	light response
MsNAC73	Box 4	ATTAAT	1087	6	-	Petroselinum crispum	part of a conserved DNA module involved in light responsiveness	light response
MsNAC73	ATCT-motif	AATCTAATCC	53	9	+	Pisum sativum	part of a conserved DNA module involved in light responsiveness	light response
MsNAC77	Box 4	ATTAAT	1701	6	-	Petroselinum crispum	part of a conserved DNA module involved in light responsiveness	light response
MsNAC78	Box 4	ATTAAT	1350	6	-	Petroselinum crispum	part of a conserved DNA module involved in light responsiveness	light response
MsNAC78	Box 4	ATTAAT	1495	6	-	Petroselinum crispum	part of a conserved DNA module involved in light responsiveness	light response
MsNAC78	Box 4	ATTAAT	1852	6	-	Petroselinum crispum	part of a conserved DNA module involved in light responsiveness	light response
MsNAC8	Box 4	ATTAAT	805	6	+	Petroselinum crispum	part of a conserved DNA module involved in light responsiveness	light response
MsNAC80	Box 4	ATTAAT	315	6	+	Petroselinum crispum	part of a conserved DNA module involved in light responsiveness	light response
MsNAC80	Box 4	ATTAAT	1158	6	-	Petroselinum crispum	part of a conserved DNA module involved in light responsiveness	light response
MsNAC81	Box 4	ATTAAT	1535	6	-	Petroselinum crispum	part of a conserved DNA module involved in light responsiveness	light response
MsNAC81	Box 4	ATTAAT	1664	6	-	Petroselinum crispum	part of a conserved DNA module involved in light responsiveness	light response
MsNAC81	ATCT-motif	AATCTAATCC	1920	9	+	Pisum sativum	part of a conserved DNA module involved in light responsiveness	light response
MsNAC84	Box 4	ATTAAT	465	6	+	Petroselinum crispum	part of a conserved DNA module involved in light responsiveness	light response
MsNAC84	ATCT-motif	AATCTAATCC	1039	9	-	Pisum sativum	part of a conserved DNA module involved in light responsiveness	light response
MsNAC85	ATCT-motif	AATCTAATCC	1923	9	-	Pisum sativum	part of a conserved DNA module involved in light responsiveness	light response
MsNAC86	Box 4	ATTAAT	563	6	+	Petroselinum crispum	part of a conserved DNA module involved in light responsiveness	light response
MsNAC86	Box 4	ATTAAT	684	6	+	Petroselinum crispum	part of a conserved DNA module involved in light responsiveness	light response
MsNAC86	Box 4	ATTAAT	701	6	+	Petroselinum crispum	part of a conserved DNA module involved in light responsiveness	light response
MsNAC86	ATC-motif	TGCTATCCA	1164	9	-	Pisum sativum	part of a conserved DNA module involved in light responsiveness	light response
MsNAC87	Box 4	ATTAAT	665	6	+	Petroselinum crispum	part of a conserved DNA module involved in light responsiveness	light response
MsNAC88	ATC-motif	AGTAATCT	1896	8	+	Spinacia oleracea	part of a conserved DNA module involved in light responsiveness	light response
MsNAC88	ATCT-motif	AATCTAATCC	1352	9	+	Pisum sativum	part of a conserved DNA module involved in light responsiveness	light response
MsNAC89	Box 4	ATTAAT	528	6	+	Petroselinum crispum	part of a conserved DNA module involved in light responsiveness	light response
MsNAC89	Box 4	ATTAAT	578	6	+	Petroselinum crispum	part of a conserved DNA module involved in light responsiveness	light response
MsNAC89	Box 4	ATTAAT	887	6	+	Petroselinum crispum	part of a conserved DNA module involved in light responsiveness	light response
MsNAC89	Box 4	ATTAAT	1472	6	-	Petroselinum crispum	part of a conserved DNA module involved in light responsiveness	light response
MsNAC9	Box 4	ATTAAT	1870	6	-	Petroselinum crispum	part of a conserved DNA module involved in light responsiveness	light response
MsNAC90	Box 4	ATTAAT	1219	6	-	Petroselinum crispum	part of a conserved DNA module involved in light responsiveness	light response
MsNAC92	Box 4	ATTAAT	1372	6	-	Petroselinum crispum	part of a conserved DNA module involved in light responsiveness	light response
MsNAC93	Box 4	ATTAAT	131	6	+	Petroselinum crispum	part of a conserved DNA module involved in light responsiveness	light response
MsNAC93	Box 4	ATTAAT	640	6	+	Petroselinum crispum	part of a conserved DNA module involved in light responsiveness	light response
MsNAC93	Box 4	ATTAAT	1567	6	-	Petroselinum crispum	part of a conserved DNA module involved in light responsiveness	light response
MsNAC93	ATCT-motif	AATCTAATCC	134	9	+	Pisum sativum	part of a conserved DNA module involved in light responsiveness	light response
MsNAC93	ATCT-motif	AATCTAATCC	1127	9	+	Pisum sativum	part of a conserved DNA module involved in light responsiveness	light response
MsNAC93	ATCT-motif	AATCTAATCC	1759	9	-	Pisum sativum	part of a conserved DNA module involved in light responsiveness	light response
MsNAC93	ATC-motif	AGCTATCCA	1459	9	+	Arabidopsis thaliana	part of a conserved DNA module involved in light responsiveness	light response
MsNAC96	ATCT-motif	AATCTAATCC	711	9	+	Pisum sativum	part of a conserved DNA module involved in light responsiveness	light response
MsNAC14	MRE	AACCTAA	617	7	-	Petroselinum crispum	MYB binding site involved in light responsiveness	light response
MsNAC15	MRE	AACCTAA	215	7	+	Petroselinum crispum	MYB binding site involved in light responsiveness	light response
MsNAC16	MRE	AACCTAA	1565	7	+	Petroselinum crispum	MYB binding site involved in light responsiveness	light response
MsNAC2	MRE	AACCTAA	1270	7	-	Petroselinum crispum	MYB binding site involved in light responsiveness	light response
MsNAC2	MRE	AACCTAA	1318	7	-	Petroselinum crispum	MYB binding site involved in light responsiveness	light response
MsNAC2	MRE	AACCTAA	1475	7	-	Petroselinum crispum	MYB binding site involved in light responsiveness	light response
MsNAC2	MRE	AACCTAA	1480	7	-	Petroselinum crispum	MYB binding site involved in light responsiveness	light response
MsNAC2	MRE	AACCTAA	1520	7	-	Petroselinum crispum	MYB binding site involved in light responsiveness	light response
MsNAC25	MRE	AACCTAA	1002	7	-	Petroselinum crispum	MYB binding site involved in light responsiveness	light response
MsNAC27	MRE	AACCTAA	1141	7	-	Petroselinum crispum	MYB binding site involved in light responsiveness	light response
MsNAC28	MRE	AACCTAA	513	7	-	Petroselinum crispum	MYB binding site involved in light responsiveness	light response
MsNAC31	MRE	AACCTAA	1734	7	+	Petroselinum crispum	MYB binding site involved in light responsiveness	light response
MsNAC34	MRE	AACCTAA	511	7	+	Petroselinum crispum	MYB binding site involved in light responsiveness	light response
MsNAC34	MRE	AACCTAA	1478	7	+	Petroselinum crispum	MYB binding site involved in light responsiveness	light response
MsNAC35	MRE	AACCTAA	1785	7	+	Petroselinum crispum	MYB binding site involved in light responsiveness	light response
MsNAC5	MRE	AACCTAA	366	7	-	Petroselinum crispum	MYB binding site involved in light responsiveness	light response
MsNAC51	MRE	AACCTAA	1229	7	+	Petroselinum crispum	MYB binding site involved in light responsiveness	light response
MsNAC61	MRE	AACCTAA	1374	7	-	Petroselinum crispum	MYB binding site involved in light responsiveness	light response
MsNAC64	MRE	AACCTAA	1615	7	+	Petroselinum crispum	MYB binding site involved in light responsiveness	light response
MsNAC67	MRE	AACCTAA	1268	7	-	Petroselinum crispum	MYB binding site involved in light responsiveness	light response
MsNAC8	MRE	AACCTAA	98	7	+	Petroselinum crispum	MYB binding site involved in light responsiveness	light response
MsNAC80	MRE	AACCTAA	461	7	+	Petroselinum crispum	MYB binding site involved in light responsiveness	light response
MsNAC80	MRE	AACCTAA	468	7	+	Petroselinum crispum	MYB binding site involved in light responsiveness	light response
MsNAC80	MRE	AACCTAA	475	7	+	Petroselinum crispum	MYB binding site involved in light responsiveness	light response
MsNAC80	MRE	AACCTAA	1310	7	-	Petroselinum crispum	MYB binding site involved in light responsiveness	light response
MsNAC86	MRE	AACCTAA	1500	7	+	Petroselinum crispum	MYB binding site involved in light responsiveness	light response
MsNAC87	MRE	AACCTAA	818	7	+	Petroselinum crispum	MYB binding site involved in light responsiveness	light response
MsNAC89	MRE	AACCTAA	976	7	-	Petroselinum crispum	MYB binding site involved in light responsiveness	light response
MsNAC93	MRE	AACCTAA	1856	7	+	Petroselinum crispum	MYB binding site involved in light responsiveness	light response
MsNAC1	Sp1	GGGCGG	661	6	-	Oryza sativa	light responsive element	light response
MsNAC14	GT1-motif	GGTTAAT	683	7	+	Avena sativa	light responsive element	light response
MsNAC17	Sp1	GGGCGG	1913	6	-	Oryza sativa	light responsive element	light response
MsNAC17	Sp1	GGGCGG	1930	6	+	Oryza sativa	light responsive element	light response
MsNAC18	GT1-motif	GGTTAA	45	6	+	Arabidopsis thaliana	light responsive element	light response
MsNAC18	GT1-motif	GGTTAAT	215	7	+	Avena sativa	light responsive element	light response
MsNAC18	GT1-motif	GGTTAA	1055	6	+	Arabidopsis thaliana	light responsive element	light response
MsNAC18	GT1-motif	GGTTAAT	1104	7	+	Avena sativa	light responsive element	light response
MsNAC19	3-AF1 binding site	TAAGAGAGGAA	1963	10	+	Solanum tuberosum	light responsive element	light response
MsNAC2	GT1-motif	GGTTAA	55	6	+	Arabidopsis thaliana	light responsive element	light response
MsNAC20	3-AF1 binding site	TAAGAGAGGAA	1376	11	-	Solanum tuberosum	light responsive element	light response
MsNAC20	GT1-motif	GGTTAA	717	6	-	Arabidopsis thaliana	light responsive element	light response
MsNAC20	GT1-motif	GGTTAA	783	6	-	Arabidopsis thaliana	light responsive element	light response
MsNAC22	GT1-motif	GGTTAA	1209	6	+	Arabidopsis thaliana	light responsive element	light response
MsNAC24	GT1-motif	GGTTAA	306	6	+	Arabidopsis thaliana	light responsive element	light response
MsNAC24	GT1-motif	GGTTAA	339	6	-	Arabidopsis thaliana	light responsive element	light response
MsNAC25	GT1-motif	GGTTAA	803	6	+	Arabidopsis thaliana	light responsive element	light response
MsNAC27	GT1-motif	GGTTAA	1176	6	+	Arabidopsis thaliana	light responsive element	light response
MsNAC28	GT1-motif	GGTTAA	506	6	+	Arabidopsis thaliana	light responsive element	light response
MsNAC29	Sp1	GGGCGG	397	6	-	Oryza sativa	light responsive element	light response
MsNAC29	Sp1	GGGCGG	1475	6	+	Oryza sativa	light responsive element	light response
MsNAC3	3-AF1 binding site	TAAGAGAGGAA	1652	10	-	Solanum tuberosum	light responsive element	light response
MsNAC3	Sp1	GGGCGG	716	6	-	Oryza sativa	light responsive element	light response
MsNAC3	Sp1	GGGCGG	1789	6	+	Oryza sativa	light responsive element	light response
MsNAC30	Sp1	GGGCGG	362	6	-	Oryza sativa	light responsive element	light response
MsNAC32	GT1-motif	GGTTAA	1743	6	+	Arabidopsis thaliana	light responsive element	light response
MsNAC33	GT1-motif	GGTTAAT	260	7	+	Avena sativa	light responsive element	light response
MsNAC33	GT1-motif	GGTTAA	1806	6	+	Arabidopsis thaliana	light responsive element	light response
MsNAC35	Sp1	GGGCGG	469	6	-	Oryza sativa	light responsive element	light response
MsNAC35	GT1-motif	GGTTAA	587	6	-	Arabidopsis thaliana	light responsive element	light response
MsNAC37	AAAC-motif	CAATCAAAACCT	393	11	+	Spinacia oleracea	light responsive element	light response
MsNAC38	GT1-motif	GGTTAA	1608	6	-	Arabidopsis thaliana	light responsive element	light response
MsNAC38	GT1-motif	GGTTAA	1939	6	-	Arabidopsis thaliana	light responsive element	light response
MsNAC41	Sp1	GGGCGG	35	6	+	Oryza sativa	light responsive element	light response
MsNAC41	GT1-motif	GGTTAA	1450	6	-	Arabidopsis thaliana	light responsive element	light response
MsNAC42	AAAC-motif	CAATCAAAACCT	277	11	+	Spinacia oleracea	light responsive element	light response
MsNAC43	Sp1	GGGCGG	1502	6	-	Oryza sativa	light responsive element	light response
MsNAC44	GT1-motif	GGTTAA	436	6	-	Arabidopsis thaliana	light responsive element	light response
MsNAC44	GT1-motif	GGTTAA	1181	6	+	Arabidopsis thaliana	light responsive element	light response
MsNAC45	GT1-motif	GGTTAA	259	6	-	Arabidopsis thaliana	light responsive element	light response
MsNAC45	Sp1	GGGCGG	482	6	+	Oryza sativa	light responsive element	light response
MsNAC46	GT1-motif	GGTTAA	622	6	+	Arabidopsis thaliana	light responsive element	light response
MsNAC46	GT1-motif	GGTTAA	1863	6	-	Arabidopsis thaliana	light responsive element	light response
MsNAC46	GT1-motif	GGTTAA	1907	6	+	Arabidopsis thaliana	light responsive element	light response
MsNAC47	Sp1	GGGCGG	1860	6	+	Oryza sativa	light responsive element	light response
MsNAC48	Sp1	GGGCGG	403	6	-	Oryza sativa	light responsive element	light response
MsNAC5	Sp1	GGGCGG	1120	6	-	Oryza sativa	light responsive element	light response
MsNAC5	GT1-motif	GGTTAA	10	6	+	Arabidopsis thaliana	light responsive element	light response
MsNAC5	GT1-motif	GTGTGTGAA	325	9	+	Solanum tuberosum	light responsive element	light response
MsNAC5	GT1-motif	GGTTAAT	1968	7	-	Avena sativa	light responsive element	light response
MsNAC5	GT1-motif	GGTTAA	1969	6	-	Arabidopsis thaliana	light responsive element	light response
MsNAC50	Sp1	GGGCGG	1653	6	-	Oryza sativa	light responsive element	light response
MsNAC50	GT1-motif	GGTTAA	1596	6	+	Arabidopsis thaliana	light responsive element	light response
MsNAC51	GT1-motif	GGTTAA	1658	6	+	Arabidopsis thaliana	light responsive element	light response
MsNAC52	GT1-motif	GGTTAAT	167	7	+	Avena sativa	light responsive element	light response
MsNAC52	GT1-motif	GGTTAAT	293	7	+	Avena sativa	light responsive element	light response
MsNAC52	GT1-motif	GGTTAAT	377	7	+	Avena sativa	light responsive element	light response
MsNAC52	GT1-motif	GGTTAA	1236	6	+	Arabidopsis thaliana	light responsive element	light response
MsNAC53	GT1-motif	GGTTAA	8	6	-	Arabidopsis thaliana	light responsive element	light response
MsNAC53	Sp1	GGGCGG	685	6	+	Oryza sativa	light responsive element	light response
MsNAC54	GT1-motif	GGTTAA	440	6	-	Arabidopsis thaliana	light responsive element	light response
MsNAC54	GT1-motif	GGTTAA	535	6	-	Arabidopsis thaliana	light responsive element	light response
MsNAC55	Sp1	GGGCGG	541	6	-	Oryza sativa	light responsive element	light response
MsNAC55	GT1-motif	GGTTAAT	7	7	+	Avena sativa	light responsive element	light response
MsNAC56	GT1-motif	GGTTAA	1271	6	-	Arabidopsis thaliana	light responsive element	light response
MsNAC58	GT1-motif	GGTTAA	1899	6	+	Arabidopsis thaliana	light responsive element	light response
MsNAC59	AAAC-motif	CAATCAAAACCT	321	11	-	Spinacia oleracea	light responsive element	light response
MsNAC6	GT1-motif	GGTTAA	1522	6	-	Arabidopsis thaliana	light responsive element	light response
MsNAC61	Sp1	GGGCGG	1828	6	+	Oryza sativa	light responsive element	light response
MsNAC62	GT1-motif	GGTTAA	1795	6	-	Arabidopsis thaliana	light responsive element	light response
MsNAC63	Sp1	GGGCGG	1261	6	+	Oryza sativa	light responsive element	light response
MsNAC63	GT1-motif	GGTTAA	1845	6	+	Arabidopsis thaliana	light responsive element	light response
MsNAC63	3-AF1 binding site	TAAGAGAGGAA	1332	10	+	Solanum tuberosum	light responsive element	light response
MsNAC65	Sp1	GGGCGG	1815	6	-	Oryza sativa	light responsive element	light response
MsNAC66	AAAC-motif	CAATCAAAACCT	177	11	+	Spinacia oleracea	light responsive element	light response
MsNAC68	AAAC-motif	CAATCAAAACCT	1813	11	-	Spinacia oleracea	light responsive element	light response
MsNAC7	GT1-motif	GGTTAAT	1865	7	-	Avena sativa	light responsive element	light response
MsNAC7	GT1-motif	GGTTAA	1866	6	-	Arabidopsis thaliana	light responsive element	light response
MsNAC70	Sp1	GGGCGG	1941	6	+	Oryza sativa	light responsive element	light response
MsNAC71	GT1-motif	GGTTAAT	15	7	+	Avena sativa	light responsive element	light response
MsNAC72	GT1-motif	GGTTAA	1585	6	-	Arabidopsis thaliana	light responsive element	light response
MsNAC73	GT1-motif	GGTTAA	483	6	-	Arabidopsis thaliana	light responsive element	light response
MsNAC73	GT1-motif	GGTTAAT	767	7	-	Avena sativa	light responsive element	light response
MsNAC73	GT1-motif	GGTTAA	768	6	-	Arabidopsis thaliana	light responsive element	light response
MsNAC74	Sp1	GGGCGG	327	6	+	Oryza sativa	light responsive element	light response
MsNAC74	Sp1	GGGCGG	1631	6	+	Oryza sativa	light responsive element	light response
MsNAC78	GT1-motif	GGTTAA	217	6	-	Arabidopsis thaliana	light responsive element	light response
MsNAC78	GT1-motif	GGTTAA	1888	6	-	Arabidopsis thaliana	light responsive element	light response
MsNAC79	AAAC-motif	CAATCAAAACCT	637	11	+	Spinacia oleracea	light responsive element	light response
MsNAC8	Sp1	GGGCGG	89	6	+	Oryza sativa	light responsive element	light response
MsNAC8	GT1-motif	GGTTAA	815	6	+	Arabidopsis thaliana	light responsive element	light response
MsNAC8	GT1-motif	GTGTGTGAA	1027	9	-	Solanum tuberosum	light responsive element	light response
MsNAC81	GT1-motif	GGTTAA	777	6	-	Arabidopsis thaliana	light responsive element	light response
MsNAC81	AAAC-motif	CAATCAAAACCT	413	11	+	Spinacia oleracea	light responsive element	light response
MsNAC85	GT1-motif	GGTTAA	648	6	+	Arabidopsis thaliana	light responsive element	light response
MsNAC85	GT1-motif	GGTTAA	1113	6	-	Arabidopsis thaliana	light responsive element	light response
MsNAC85	GT1-motif	GGTTAAT	1547	7	-	Avena sativa	light responsive element	light response
MsNAC85	GT1-motif	GGTTAA	1548	6	-	Arabidopsis thaliana	light responsive element	light response
MsNAC86	AAAC-motif	CAATCAAAACCT	235	11	+	Spinacia oleracea	light responsive element	light response
MsNAC86	GT1-motif	GGTTAA	891	6	-	Arabidopsis thaliana	light responsive element	light response
MsNAC86	GT1-motif	GGTTAA	1591	6	-	Arabidopsis thaliana	light responsive element	light response
MsNAC86	GT1-motif	GGTTAA	1861	6	-	Arabidopsis thaliana	light responsive element	light response
MsNAC88	Sp1	GGGCGG	805	6	-	Oryza sativa	light responsive element	light response
MsNAC88	GT1-motif	GGTTAAT	1072	7	-	Avena sativa	light responsive element	light response
MsNAC88	GT1-motif	GGTTAA	1073	6	-	Arabidopsis thaliana	light responsive element	light response
MsNAC9	GT1-motif	GGTTAA	686	6	+	Arabidopsis thaliana	light responsive element	light response
MsNAC90	GT1-motif	GGTTAA	1078	6	-	Arabidopsis thaliana	light responsive element	light response
MsNAC90	GT1-motif	GGTTAA	1230	6	-	Arabidopsis thaliana	light responsive element	light response
MsNAC91	GT1-motif	GGTTAA	1166	6	+	Arabidopsis thaliana	light responsive element	light response
MsNAC92	GT1-motif	GGTTAA	793	6	+	Arabidopsis thaliana	light responsive element	light response
MsNAC94	Sp1	GGGCGG	1854	6	-	Oryza sativa	light responsive element	light response
MsNAC95	GT1-motif	GGTTAAT	1315	7	+	Avena sativa	light responsive element	light response
MsNAC95	GT1-motif	GGTTAA	1448	6	-	Arabidopsis thaliana	light responsive element	light response
MsNAC1	G-Box	CACGTG	1508	6	-	Pisum sativum	cis-acting regulatory element involved in light responsiveness	light response
MsNAC1	G-Box	CACGTT	1540	6	-	Pisum sativum	cis-acting regulatory element involved in light responsiveness	light response
MsNAC1	G-Box	CACGTG	1713	6	-	Pisum sativum	cis-acting regulatory element involved in light responsiveness	light response
MsNAC1	G-Box	CACGTT	1967	6	+	Pisum sativum	cis-acting regulatory element involved in light responsiveness	light response
MsNAC1	G-box	CACGAC	666	6	+	Zea mays	cis-acting regulatory element involved in light responsiveness	light response
MsNAC1	G-box	TACGTG	689	6	+	Arabidopsis thaliana	cis-acting regulatory element involved in light responsiveness	light response
MsNAC1	G-box	tgACACGTGGCA	1505	11	+	Lycopersicon esculentum	cis-acting regulatory element involved in light responsiveness	light response
MsNAC1	G-box	CAGACGTGGCA	1506	10	+	Nicotiana plumbaginifolia	cis-acting regulatory element involved in light responsiveness	light response
MsNAC1	G-box	ACACGTGGC	1507	9	+	Brassica napus	cis-acting regulatory element involved in light responsiveness	light response
MsNAC1	G-box	CACGTG	1508	6	-	Arabidopsis thaliana	cis-acting regulatory element involved in light responsiveness	light response
MsNAC1	G-box	CACGTG	1713	6	-	Arabidopsis thaliana	cis-acting regulatory element involved in light responsiveness	light response
MsNAC12	G-box	ACACGTGT	123	8	+	Brassica napus	cis-acting regulatory element involved in light responsiveness	light response
MsNAC12	G-box	CACGTG	124	6	+	Arabidopsis thaliana	cis-acting regulatory element involved in light responsiveness	light response
MsNAC12	G-box	tgACACGTGGCA	143	11	-	Lycopersicon esculentum	cis-acting regulatory element involved in light responsiveness	light response
MsNAC12	G-box	ACACGTGGC	144	9	-	Brassica napus	cis-acting regulatory element involved in light responsiveness	light response
MsNAC12	G-box	TAACACGTAG	145	9	-	Brassica oleracea	cis-acting regulatory element involved in light responsiveness	light response
MsNAC12	G-box	CACGTG	146	6	+	Arabidopsis thaliana	cis-acting regulatory element involved in light responsiveness	light response
MsNAC13	G-Box	CACGTG	1010	6	-	Pisum sativum	cis-acting regulatory element involved in light responsiveness	light response
MsNAC13	G-Box	CACGTG	1289	6	-	Pisum sativum	cis-acting regulatory element involved in light responsiveness	light response
MsNAC13	G-box	TACGTG	146	6	-	Arabidopsis thaliana	cis-acting regulatory element involved in light responsiveness	light response
MsNAC13	G-box	CACGAC	922	6	-	Zea mays	cis-acting regulatory element involved in light responsiveness	light response
MsNAC13	G-box	CACGTC	993	6	+	Zea mays	cis-acting regulatory element involved in light responsiveness	light response
MsNAC13	G-box	CACGTG	1010	6	-	Arabidopsis thaliana	cis-acting regulatory element involved in light responsiveness	light response
MsNAC13	G-box	CACGTG	1289	6	-	Arabidopsis thaliana	cis-acting regulatory element involved in light responsiveness	light response
MsNAC13	G-box	TACGTG	1490	6	-	Arabidopsis thaliana	cis-acting regulatory element involved in light responsiveness	light response
MsNAC13	G-box	CACGAC	1890	6	-	Zea mays	cis-acting regulatory element involved in light responsiveness	light response
MsNAC14	G-box	ACACGTGT	1058	8	-	Brassica napus	cis-acting regulatory element involved in light responsiveness	light response
MsNAC14	G-box	CACGTG	1059	6	-	Arabidopsis thaliana	cis-acting regulatory element involved in light responsiveness	light response
MsNAC14	G-box	CACGTG	1521	6	-	Arabidopsis thaliana	cis-acting regulatory element involved in light responsiveness	light response
MsNAC14	G-box	TACGTG	1546	6	-	Arabidopsis thaliana	cis-acting regulatory element involved in light responsiveness	light response
MsNAC14	G-box	ACACGTGT	1554	8	-	Brassica napus	cis-acting regulatory element involved in light responsiveness	light response
MsNAC14	G-box	CACGTG	1555	6	-	Arabidopsis thaliana	cis-acting regulatory element involved in light responsiveness	light response
MsNAC14	G-box	CACGAC	1938	6	+	Zea mays	cis-acting regulatory element involved in light responsiveness	light response
MsNAC14	G-Box	CACGTG	1059	6	-	Pisum sativum	cis-acting regulatory element involved in light responsiveness	light response
MsNAC14	G-Box	CACGTT	1112	6	-	Pisum sativum	cis-acting regulatory element involved in light responsiveness	light response
MsNAC14	G-Box	CACGTG	1521	6	-	Pisum sativum	cis-acting regulatory element involved in light responsiveness	light response
MsNAC14	G-Box	CACGTG	1555	6	-	Pisum sativum	cis-acting regulatory element involved in light responsiveness	light response
MsNAC15	G-Box	CACGTG	446	6	+	Pisum sativum	cis-acting regulatory element involved in light responsiveness	light response
MsNAC15	G-Box	CACGTT	699	6	+	Pisum sativum	cis-acting regulatory element involved in light responsiveness	light response
MsNAC15	G-box	CACGTG	446	6	+	Arabidopsis thaliana	cis-acting regulatory element involved in light responsiveness	light response
MsNAC16	G-Box	CACGTG	399	6	+	Pisum sativum	cis-acting regulatory element involved in light responsiveness	light response
MsNAC16	G-Box	CACGTT	494	6	+	Pisum sativum	cis-acting regulatory element involved in light responsiveness	light response
MsNAC16	G-box	ACACGTGT	398	8	+	Brassica napus	cis-acting regulatory element involved in light responsiveness	light response
MsNAC16	G-box	CACGTG	399	6	+	Arabidopsis thaliana	cis-acting regulatory element involved in light responsiveness	light response
MsNAC16	G-box	CACGAC	889	6	-	Zea mays	cis-acting regulatory element involved in light responsiveness	light response
MsNAC16	G-box	CACGTC	902	6	-	Zea mays	cis-acting regulatory element involved in light responsiveness	light response
MsNAC16	G-box	CACGTC	1093	6	+	Zea mays	cis-acting regulatory element involved in light responsiveness	light response
MsNAC16	G-box	CACGTC	1121	6	+	Zea mays	cis-acting regulatory element involved in light responsiveness	light response
MsNAC17	G-box	CACGTC	269	6	-	Zea mays	cis-acting regulatory element involved in light responsiveness	light response
MsNAC17	G-box	TACGTG	278	6	+	Arabidopsis thaliana	cis-acting regulatory element involved in light responsiveness	light response
MsNAC17	G-box	TACGTG	366	6	+	Arabidopsis thaliana	cis-acting regulatory element involved in light responsiveness	light response
MsNAC17	G-box	GCCACGTGGA	1903	9	+	Arabidopsis thaliana	cis-acting regulatory element involved in light responsiveness	light response
MsNAC17	G-box	CACGTG	1905	6	-	Arabidopsis thaliana	cis-acting regulatory element involved in light responsiveness	light response
MsNAC17	G-Box	CACGTT	261	6	+	Pisum sativum	cis-acting regulatory element involved in light responsiveness	light response
MsNAC17	G-Box	CACGTG	1905	6	-	Pisum sativum	cis-acting regulatory element involved in light responsiveness	light response
MsNAC18	G-box	TAACACGTAG	837	9	-	Brassica oleracea	cis-acting regulatory element involved in light responsiveness	light response
MsNAC18	G-box	TACGTG	1160	6	-	Arabidopsis thaliana	cis-acting regulatory element involved in light responsiveness	light response
MsNAC19	G-Box	CACGTG	32	6	+	Pisum sativum	cis-acting regulatory element involved in light responsiveness	light response
MsNAC19	G-Box	CACGTG	1884	6	-	Pisum sativum	cis-acting regulatory element involved in light responsiveness	light response
MsNAC19	G-box	ACACGTGT	31	8	+	Brassica napus	cis-acting regulatory element involved in light responsiveness	light response
MsNAC19	G-box	CACGTG	32	6	+	Arabidopsis thaliana	cis-acting regulatory element involved in light responsiveness	light response
MsNAC19	G-box	TACGTG	1671	6	-	Arabidopsis thaliana	cis-acting regulatory element involved in light responsiveness	light response
MsNAC19	G-box	CACGTC	1825	6	-	Zea mays	cis-acting regulatory element involved in light responsiveness	light response
MsNAC19	G-box	GCCACGTGGA	1882	9	+	Arabidopsis thaliana	cis-acting regulatory element involved in light responsiveness	light response
MsNAC19	G-box	CACGTG	1884	6	-	Arabidopsis thaliana	cis-acting regulatory element involved in light responsiveness	light response
MsNAC2	G-box	TACGTG	133	6	-	Arabidopsis thaliana	cis-acting regulatory element involved in light responsiveness	light response
MsNAC2	G-box	TACGTG	141	6	+	Arabidopsis thaliana	cis-acting regulatory element involved in light responsiveness	light response
MsNAC2	G-box	ACACGTGT	149	8	+	Brassica napus	cis-acting regulatory element involved in light responsiveness	light response
MsNAC2	G-box	CACGTG	150	6	+	Arabidopsis thaliana	cis-acting regulatory element involved in light responsiveness	light response
MsNAC2	G-box	CACGAC	327	6	-	Zea mays	cis-acting regulatory element involved in light responsiveness	light response
MsNAC2	G-box	TACGTG	1751	6	-	Arabidopsis thaliana	cis-acting regulatory element involved in light responsiveness	light response
MsNAC2	G-Box	CACGTT	11	6	+	Pisum sativum	cis-acting regulatory element involved in light responsiveness	light response
MsNAC2	G-Box	CACGTG	150	6	+	Pisum sativum	cis-acting regulatory element involved in light responsiveness	light response
MsNAC20	G-box	ACACGTGT	330	8	+	Brassica napus	cis-acting regulatory element involved in light responsiveness	light response
MsNAC20	G-box	CACGTG	331	6	+	Arabidopsis thaliana	cis-acting regulatory element involved in light responsiveness	light response
MsNAC20	G-box	CCACGTAA	467	8	-	Brassica napus	cis-acting regulatory element involved in light responsiveness	light response
MsNAC20	G-box	TACGTG	468	6	+	Arabidopsis thaliana	cis-acting regulatory element involved in light responsiveness	light response
MsNAC20	G-Box	CACGTG	331	6	+	Pisum sativum	cis-acting regulatory element involved in light responsiveness	light response
MsNAC22	G-box	CACGTG	196	6	+	Arabidopsis thaliana	cis-acting regulatory element involved in light responsiveness	light response
MsNAC22	G-box	ACACGTGT	1685	8	-	Brassica napus	cis-acting regulatory element involved in light responsiveness	light response
MsNAC22	G-box	CACGTG	1686	6	-	Arabidopsis thaliana	cis-acting regulatory element involved in light responsiveness	light response
MsNAC22	G-box	ACACGTGT	1878	8	-	Brassica napus	cis-acting regulatory element involved in light responsiveness	light response
MsNAC22	G-box	CACGTG	1879	6	-	Arabidopsis thaliana	cis-acting regulatory element involved in light responsiveness	light response
MsNAC22	G-Box	CACGTG	196	6	+	Pisum sativum	cis-acting regulatory element involved in light responsiveness	light response
MsNAC22	G-Box	CACGTG	1686	6	-	Pisum sativum	cis-acting regulatory element involved in light responsiveness	light response
MsNAC22	G-Box	CACGTG	1879	6	-	Pisum sativum	cis-acting regulatory element involved in light responsiveness	light response
MsNAC23	G-box	CACGTC	67	6	+	Zea mays	cis-acting regulatory element involved in light responsiveness	light response
MsNAC23	G-box	CACGTC	215	6	+	Zea mays	cis-acting regulatory element involved in light responsiveness	light response
MsNAC23	G-box	CACGTC	363	6	+	Zea mays	cis-acting regulatory element involved in light responsiveness	light response
MsNAC23	G-box	CACGTC	511	6	+	Zea mays	cis-acting regulatory element involved in light responsiveness	light response
MsNAC23	G-box	CACGTC	659	6	+	Zea mays	cis-acting regulatory element involved in light responsiveness	light response
MsNAC23	G-box	CACGTC	807	6	+	Zea mays	cis-acting regulatory element involved in light responsiveness	light response
MsNAC23	G-box	CACGTC	955	6	+	Zea mays	cis-acting regulatory element involved in light responsiveness	light response
MsNAC23	G-box	CACGTC	1103	6	+	Zea mays	cis-acting regulatory element involved in light responsiveness	light response
MsNAC23	G-box	CACGTC	1251	6	+	Zea mays	cis-acting regulatory element involved in light responsiveness	light response
MsNAC23	G-box	CACGTC	1695	6	+	Zea mays	cis-acting regulatory element involved in light responsiveness	light response
MsNAC23	G-box	CACGTC	1843	6	+	Zea mays	cis-acting regulatory element involved in light responsiveness	light response
MsNAC23	G-box	CACGTC	1991	6	+	Zea mays	cis-acting regulatory element involved in light responsiveness	light response
MsNAC24	G-box	TACGTG	1582	6	-	Arabidopsis thaliana	cis-acting regulatory element involved in light responsiveness	light response
MsNAC25	G-box	tgACACGTGGCA	566	11	-	Lycopersicon esculentum	cis-acting regulatory element involved in light responsiveness	light response
MsNAC25	G-box	tgACACGTGGCA	689	11	+	Lycopersicon esculentum	cis-acting regulatory element involved in light responsiveness	light response
MsNAC25	G-box	CAGACGTGGCA	690	10	+	Nicotiana plumbaginifolia	cis-acting regulatory element involved in light responsiveness	light response
MsNAC25	G-box	ACACGTGGC	691	9	+	Brassica napus	cis-acting regulatory element involved in light responsiveness	light response
MsNAC25	G-box	CACGTG	692	6	+	Arabidopsis thaliana	cis-acting regulatory element involved in light responsiveness	light response
MsNAC25	G-box	TACGTG	1187	6	+	Arabidopsis thaliana	cis-acting regulatory element involved in light responsiveness	light response
MsNAC25	G-Box	CACGTT	554	6	+	Pisum sativum	cis-acting regulatory element involved in light responsiveness	light response
MsNAC25	G-Box	CACGTG	692	6	+	Pisum sativum	cis-acting regulatory element involved in light responsiveness	light response
MsNAC25	G-Box	CACGTT	945	6	+	Pisum sativum	cis-acting regulatory element involved in light responsiveness	light response
MsNAC26	G-box	CACGAC	1295	6	+	Zea mays	cis-acting regulatory element involved in light responsiveness	light response
MsNAC26	G-box	TACGTG	1351	6	+	Arabidopsis thaliana	cis-acting regulatory element involved in light responsiveness	light response
MsNAC26	G-box	CCACGTAA	1712	8	-	Brassica napus	cis-acting regulatory element involved in light responsiveness	light response
MsNAC26	G-box	TACGTG	1713	6	+	Arabidopsis thaliana	cis-acting regulatory element involved in light responsiveness	light response
MsNAC27	G-box	TACGTG	1354	6	+	Arabidopsis thaliana	cis-acting regulatory element involved in light responsiveness	light response
MsNAC27	G-box	CCACGTAA	1588	8	+	Brassica napus	cis-acting regulatory element involved in light responsiveness	light response
MsNAC27	G-box	TACGTG	1589	6	-	Arabidopsis thaliana	cis-acting regulatory element involved in light responsiveness	light response
MsNAC27	G-Box	TCCACATGGCA	987	10	+	Triticum aestivum	cis-acting regulatory element involved in light responsiveness	light response
MsNAC28	G-box	TGACACGTGGCTCT	197	13	+	Helianthus annuus	cis-acting regulatory element involved in light responsiveness	light response
MsNAC28	G-box	ACACGTGT	199	8	+	Brassica napus	cis-acting regulatory element involved in light responsiveness	light response
MsNAC28	G-box	CACGTG	200	6	+	Arabidopsis thaliana	cis-acting regulatory element involved in light responsiveness	light response
MsNAC28	G-box	CACGTC	234	6	+	Zea mays	cis-acting regulatory element involved in light responsiveness	light response
MsNAC28	G-box	CACGTC	1069	6	-	Zea mays	cis-acting regulatory element involved in light responsiveness	light response
MsNAC28	G-box	CACGTC	1119	6	-	Zea mays	cis-acting regulatory element involved in light responsiveness	light response
MsNAC28	G-Box	CACGTT	28	6	-	Pisum sativum	cis-acting regulatory element involved in light responsiveness	light response
MsNAC28	G-Box	CACGTG	200	6	+	Pisum sativum	cis-acting regulatory element involved in light responsiveness	light response
MsNAC29	G-box	TACGTG	688	6	+	Arabidopsis thaliana	cis-acting regulatory element involved in light responsiveness	light response
MsNAC29	G-box	CACGAC	1664	6	-	Zea mays	cis-acting regulatory element involved in light responsiveness	light response
MsNAC29	G-Box	CACGTT	131	6	+	Pisum sativum	cis-acting regulatory element involved in light responsiveness	light response
MsNAC3	G-Box	CACGTT	725	6	+	Pisum sativum	cis-acting regulatory element involved in light responsiveness	light response
MsNAC3	G-box	TACGTG	66	6	+	Arabidopsis thaliana	cis-acting regulatory element involved in light responsiveness	light response
MsNAC30	G-Box	CACGTG	23	6	+	Pisum sativum	cis-acting regulatory element involved in light responsiveness	light response
MsNAC30	G-Box	CACGTG	51	6	+	Pisum sativum	cis-acting regulatory element involved in light responsiveness	light response
MsNAC30	G-Box	CACGTG	298	6	+	Pisum sativum	cis-acting regulatory element involved in light responsiveness	light response
MsNAC30	G-Box	CACGTG	1177	6	-	Pisum sativum	cis-acting regulatory element involved in light responsiveness	light response
MsNAC30	G-Box	CACGTG	1319	6	-	Pisum sativum	cis-acting regulatory element involved in light responsiveness	light response
MsNAC30	G-box	CACGTG	23	6	+	Arabidopsis thaliana	cis-acting regulatory element involved in light responsiveness	light response
MsNAC30	G-box	ACACGTGT	50	8	+	Brassica napus	cis-acting regulatory element involved in light responsiveness	light response
MsNAC30	G-box	CACGTG	51	6	+	Arabidopsis thaliana	cis-acting regulatory element involved in light responsiveness	light response
MsNAC30	G-box	CACGTC	207	6	-	Zea mays	cis-acting regulatory element involved in light responsiveness	light response
MsNAC30	G-box	CACGTG	298	6	+	Arabidopsis thaliana	cis-acting regulatory element involved in light responsiveness	light response
MsNAC30	G-box	TACGTG	382	6	-	Arabidopsis thaliana	cis-acting regulatory element involved in light responsiveness	light response
MsNAC30	G-box	ACACGTGT	1176	8	-	Brassica napus	cis-acting regulatory element involved in light responsiveness	light response
MsNAC30	G-box	CACGTG	1177	6	-	Arabidopsis thaliana	cis-acting regulatory element involved in light responsiveness	light response
MsNAC30	G-box	GCCACGTGGA	1317	9	+	Arabidopsis thaliana	cis-acting regulatory element involved in light responsiveness	light response
MsNAC30	G-box	CACGTG	1319	6	-	Arabidopsis thaliana	cis-acting regulatory element involved in light responsiveness	light response
MsNAC31	G-box	TACGTG	43	6	+	Arabidopsis thaliana	cis-acting regulatory element involved in light responsiveness	light response
MsNAC31	G-box	CACGTG	788	6	+	Arabidopsis thaliana	cis-acting regulatory element involved in light responsiveness	light response
MsNAC31	G-Box	CACGTG	788	6	+	Pisum sativum	cis-acting regulatory element involved in light responsiveness	light response
MsNAC32	G-Box	CACGTT	1341	6	+	Pisum sativum	cis-acting regulatory element involved in light responsiveness	light response
MsNAC32	G-box	CCACGTAA	953	8	+	Brassica napus	cis-acting regulatory element involved in light responsiveness	light response
MsNAC32	G-box	TACGTG	954	6	-	Arabidopsis thaliana	cis-acting regulatory element involved in light responsiveness	light response
MsNAC32	G-box	TACGTG	1655	6	-	Arabidopsis thaliana	cis-acting regulatory element involved in light responsiveness	light response
MsNAC32	G-box	TACGTG	1979	6	-	Arabidopsis thaliana	cis-acting regulatory element involved in light responsiveness	light response
MsNAC33	G-box	CACGAC	724	6	+	Zea mays	cis-acting regulatory element involved in light responsiveness	light response
MsNAC33	G-box	CACGTC	1781	6	-	Zea mays	cis-acting regulatory element involved in light responsiveness	light response
MsNAC34	G-Box	CACGTG	278	6	+	Pisum sativum	cis-acting regulatory element involved in light responsiveness	light response
MsNAC34	G-box	CACGTG	278	6	+	Arabidopsis thaliana	cis-acting regulatory element involved in light responsiveness	light response
MsNAC34	G-box	CACGAC	1108	6	-	Zea mays	cis-acting regulatory element involved in light responsiveness	light response
MsNAC35	G-Box	CACGTT	1695	6	+	Pisum sativum	cis-acting regulatory element involved in light responsiveness	light response
MsNAC35	G-Box	CACGTG	1794	6	-	Pisum sativum	cis-acting regulatory element involved in light responsiveness	light response
MsNAC35	G-Box	CACGTT	1804	6	+	Pisum sativum	cis-acting regulatory element involved in light responsiveness	light response
MsNAC35	G-box	ACACGTGT	1793	8	-	Brassica napus	cis-acting regulatory element involved in light responsiveness	light response
MsNAC35	G-box	CACGTG	1794	6	-	Arabidopsis thaliana	cis-acting regulatory element involved in light responsiveness	light response
MsNAC36	G-box	CCACGTAA	1260	8	-	Brassica napus	cis-acting regulatory element involved in light responsiveness	light response
MsNAC36	G-box	TACGTG	1261	6	+	Arabidopsis thaliana	cis-acting regulatory element involved in light responsiveness	light response
MsNAC36	G-box	CACGAC	1809	6	-	Zea mays	cis-acting regulatory element involved in light responsiveness	light response
MsNAC37	G-box	CACGTC	119	6	+	Zea mays	cis-acting regulatory element involved in light responsiveness	light response
MsNAC37	G-box	TACGTG	453	6	+	Arabidopsis thaliana	cis-acting regulatory element involved in light responsiveness	light response
MsNAC37	G-Box	TCCACATGGCA	156	10	+	Triticum aestivum	cis-acting regulatory element involved in light responsiveness	light response
MsNAC38	G-Box	CACGTT	815	6	+	Pisum sativum	cis-acting regulatory element involved in light responsiveness	light response
MsNAC38	G-Box	CACGTT	1624	6	+	Pisum sativum	cis-acting regulatory element involved in light responsiveness	light response
MsNAC39	G-box	GCCACGTGGA	146	9	+	Arabidopsis thaliana	cis-acting regulatory element involved in light responsiveness	light response
MsNAC39	G-box	ACACGTGT	1026	8	-	Brassica napus	cis-acting regulatory element involved in light responsiveness	light response
MsNAC39	G-box	CACGTG	1027	6	-	Arabidopsis thaliana	cis-acting regulatory element involved in light responsiveness	light response
MsNAC39	G-box	TACGTG	1083	6	-	Arabidopsis thaliana	cis-acting regulatory element involved in light responsiveness	light response
MsNAC39	G-box	ACACGTGT	1104	8	-	Brassica napus	cis-acting regulatory element involved in light responsiveness	light response
MsNAC39	G-box	CACGTG	1105	6	-	Arabidopsis thaliana	cis-acting regulatory element involved in light responsiveness	light response
MsNAC39	G-Box	CACGTG	1027	6	-	Pisum sativum	cis-acting regulatory element involved in light responsiveness	light response
MsNAC39	G-Box	CACGTG	1105	6	-	Pisum sativum	cis-acting regulatory element involved in light responsiveness	light response
MsNAC4	G-Box	CACGTT	189	6	-	Pisum sativum	cis-acting regulatory element involved in light responsiveness	light response
MsNAC4	G-Box	TCCACATGGCA	806	10	+	Triticum aestivum	cis-acting regulatory element involved in light responsiveness	light response
MsNAC4	G-Box	CACGTG	1173	6	-	Pisum sativum	cis-acting regulatory element involved in light responsiveness	light response
MsNAC4	G-box	tgACACGTGGCA	1170	11	+	Lycopersicon esculentum	cis-acting regulatory element involved in light responsiveness	light response
MsNAC4	G-box	GCCACGTGGA	1171	9	-	Arabidopsis thaliana	cis-acting regulatory element involved in light responsiveness	light response
MsNAC4	G-box	ACACGTGGC	1172	9	+	Brassica napus	cis-acting regulatory element involved in light responsiveness	light response
MsNAC4	G-box	CACGTG	1173	6	-	Arabidopsis thaliana	cis-acting regulatory element involved in light responsiveness	light response
MsNAC40	G-Box	CACGTT	1505	6	+	Pisum sativum	cis-acting regulatory element involved in light responsiveness	light response
MsNAC40	G-box	GCCACGTGGA	237	9	-	Arabidopsis thaliana	cis-acting regulatory element involved in light responsiveness	light response
MsNAC40	G-box	CACGTC	298	6	+	Zea mays	cis-acting regulatory element involved in light responsiveness	light response
MsNAC40	G-box	TACGTG	384	6	+	Arabidopsis thaliana	cis-acting regulatory element involved in light responsiveness	light response
MsNAC40	G-box	TACGTG	803	6	-	Arabidopsis thaliana	cis-acting regulatory element involved in light responsiveness	light response
MsNAC40	G-box	CACGAC	1106	6	+	Zea mays	cis-acting regulatory element involved in light responsiveness	light response
MsNAC40	G-box	CACGAC	1114	6	-	Zea mays	cis-acting regulatory element involved in light responsiveness	light response
MsNAC40	G-box	CACGAC	1155	6	+	Zea mays	cis-acting regulatory element involved in light responsiveness	light response
MsNAC41	G-Box	CACGTT	1248	6	-	Pisum sativum	cis-acting regulatory element involved in light responsiveness	light response
MsNAC41	G-box	CCACGTAA	183	8	-	Brassica napus	cis-acting regulatory element involved in light responsiveness	light response
MsNAC41	G-box	TACGTG	184	6	+	Arabidopsis thaliana	cis-acting regulatory element involved in light responsiveness	light response
MsNAC41	G-box	CACGAC	735	6	-	Zea mays	cis-acting regulatory element involved in light responsiveness	light response
MsNAC41	G-box	CACGAC	742	6	+	Zea mays	cis-acting regulatory element involved in light responsiveness	light response
MsNAC41	G-box	TACGTG	1919	6	+	Arabidopsis thaliana	cis-acting regulatory element involved in light responsiveness	light response
MsNAC42	G-box	CACGTC	272	6	+	Zea mays	cis-acting regulatory element involved in light responsiveness	light response
MsNAC43	G-box	GCCACGTGGA	319	9	-	Arabidopsis thaliana	cis-acting regulatory element involved in light responsiveness	light response
MsNAC44	G-box	TACGTG	739	6	-	Arabidopsis thaliana	cis-acting regulatory element involved in light responsiveness	light response
MsNAC44	G-box	CACGTG	910	6	+	Arabidopsis thaliana	cis-acting regulatory element involved in light responsiveness	light response
MsNAC44	G-Box	CACGTG	910	6	+	Pisum sativum	cis-acting regulatory element involved in light responsiveness	light response
MsNAC44	G-Box	CACGTT	1228	6	+	Pisum sativum	cis-acting regulatory element involved in light responsiveness	light response
MsNAC44	G-Box	CACGTT	1333	6	-	Pisum sativum	cis-acting regulatory element involved in light responsiveness	light response
MsNAC45	G-Box	CACGTG	153	6	+	Pisum sativum	cis-acting regulatory element involved in light responsiveness	light response
MsNAC45	G-Box	CACGTG	352	6	+	Pisum sativum	cis-acting regulatory element involved in light responsiveness	light response
MsNAC45	G-Box	CACGTG	1741	6	-	Pisum sativum	cis-acting regulatory element involved in light responsiveness	light response
MsNAC45	G-Box	TCCACATGGCA	1967	10	-	Triticum aestivum	cis-acting regulatory element involved in light responsiveness	light response
MsNAC45	G-box	ACACGTGT	152	8	+	Brassica napus	cis-acting regulatory element involved in light responsiveness	light response
MsNAC45	G-box	CACGTG	153	6	+	Arabidopsis thaliana	cis-acting regulatory element involved in light responsiveness	light response
MsNAC45	G-box	CACGAC	318	6	+	Zea mays	cis-acting regulatory element involved in light responsiveness	light response
MsNAC45	G-box	CACGTG	352	6	+	Arabidopsis thaliana	cis-acting regulatory element involved in light responsiveness	light response
MsNAC45	G-box	TACGTG	1449	6	-	Arabidopsis thaliana	cis-acting regulatory element involved in light responsiveness	light response
MsNAC45	G-box	tgACACGTGGCA	1738	11	-	Lycopersicon esculentum	cis-acting regulatory element involved in light responsiveness	light response
MsNAC45	G-box	ACACGTGGC	1739	9	-	Brassica napus	cis-acting regulatory element involved in light responsiveness	light response
MsNAC45	G-box	CACGTG	1741	6	-	Arabidopsis thaliana	cis-acting regulatory element involved in light responsiveness	light response
MsNAC46	G-box	CACGTC	1515	6	+	Zea mays	cis-acting regulatory element involved in light responsiveness	light response
MsNAC46	G-box	TACGTG	1881	6	+	Arabidopsis thaliana	cis-acting regulatory element involved in light responsiveness	light response
MsNAC46	G-box	CACGAC	1887	6	+	Zea mays	cis-acting regulatory element involved in light responsiveness	light response
MsNAC47	G-Box	CACGTG	1574	6	-	Pisum sativum	cis-acting regulatory element involved in light responsiveness	light response
MsNAC47	G-Box	CACGTT	1907	6	+	Pisum sativum	cis-acting regulatory element involved in light responsiveness	light response
MsNAC47	G-box	TACGTG	770	6	-	Arabidopsis thaliana	cis-acting regulatory element involved in light responsiveness	light response
MsNAC47	G-box	CACGTG	1574	6	-	Arabidopsis thaliana	cis-acting regulatory element involved in light responsiveness	light response
MsNAC48	G-Box	CACGTG	424	6	+	Pisum sativum	cis-acting regulatory element involved in light responsiveness	light response
MsNAC48	G-Box	CACGTG	639	6	+	Pisum sativum	cis-acting regulatory element involved in light responsiveness	light response
MsNAC48	G-Box	CACGTT	661	6	+	Pisum sativum	cis-acting regulatory element involved in light responsiveness	light response
MsNAC48	G-Box	CACGTG	1090	6	-	Pisum sativum	cis-acting regulatory element involved in light responsiveness	light response
MsNAC48	G-box	CACGTC	190	6	-	Zea mays	cis-acting regulatory element involved in light responsiveness	light response
MsNAC48	G-box	CACGTG	424	6	+	Arabidopsis thaliana	cis-acting regulatory element involved in light responsiveness	light response
MsNAC48	G-box	CACGTG	639	6	+	Arabidopsis thaliana	cis-acting regulatory element involved in light responsiveness	light response
MsNAC48	G-box	CACGTG	1090	6	-	Arabidopsis thaliana	cis-acting regulatory element involved in light responsiveness	light response
MsNAC49	G-box	CACGAC	625	6	+	Zea mays	cis-acting regulatory element involved in light responsiveness	light response
MsNAC49	G-box	CACGTG	1225	6	-	Arabidopsis thaliana	cis-acting regulatory element involved in light responsiveness	light response
MsNAC49	G-box	CACGAC	1560	6	+	Zea mays	cis-acting regulatory element involved in light responsiveness	light response
MsNAC49	G-Box	CACGTG	1225	6	-	Pisum sativum	cis-acting regulatory element involved in light responsiveness	light response
MsNAC49	G-Box	CACGTT	1939	6	-	Pisum sativum	cis-acting regulatory element involved in light responsiveness	light response
MsNAC5	G-box	CACGTG	306	6	+	Arabidopsis thaliana	cis-acting regulatory element involved in light responsiveness	light response
MsNAC5	G-box	ACACGTGT	321	8	+	Brassica napus	cis-acting regulatory element involved in light responsiveness	light response
MsNAC5	G-box	CACGTG	322	6	+	Arabidopsis thaliana	cis-acting regulatory element involved in light responsiveness	light response
MsNAC5	G-box	CACGAC	1481	6	-	Zea mays	cis-acting regulatory element involved in light responsiveness	light response
MsNAC5	G-box	CACGAC	1959	6	+	Zea mays	cis-acting regulatory element involved in light responsiveness	light response
MsNAC5	G-Box	CACGTG	306	6	+	Pisum sativum	cis-acting regulatory element involved in light responsiveness	light response
MsNAC5	G-Box	CACGTG	322	6	+	Pisum sativum	cis-acting regulatory element involved in light responsiveness	light response
MsNAC50	G-Box	CACGTT	1132	6	-	Pisum sativum	cis-acting regulatory element involved in light responsiveness	light response
MsNAC50	G-Box	CACGTG	1440	6	-	Pisum sativum	cis-acting regulatory element involved in light responsiveness	light response
MsNAC50	G-box	CACGTC	1206	6	-	Zea mays	cis-acting regulatory element involved in light responsiveness	light response
MsNAC50	G-box	tgACACGTGGCA	1437	11	+	Lycopersicon esculentum	cis-acting regulatory element involved in light responsiveness	light response
MsNAC50	G-box	CAGACGTGGCA	1438	10	+	Nicotiana plumbaginifolia	cis-acting regulatory element involved in light responsiveness	light response
MsNAC50	G-box	ACACGTGGC	1439	9	+	Brassica napus	cis-acting regulatory element involved in light responsiveness	light response
MsNAC50	G-box	CACGTG	1440	6	-	Arabidopsis thaliana	cis-acting regulatory element involved in light responsiveness	light response
MsNAC50	G-box	TACGTG	1768	6	+	Arabidopsis thaliana	cis-acting regulatory element involved in light responsiveness	light response
MsNAC52	G-Box	CACGTT	239	6	+	Pisum sativum	cis-acting regulatory element involved in light responsiveness	light response
MsNAC52	G-Box	CACGTT	365	6	+	Pisum sativum	cis-acting regulatory element involved in light responsiveness	light response
MsNAC52	G-Box	CACGTG	695	6	+	Pisum sativum	cis-acting regulatory element involved in light responsiveness	light response
MsNAC52	G-Box	CACGTG	726	6	+	Pisum sativum	cis-acting regulatory element involved in light responsiveness	light response
MsNAC52	G-Box	CACGTG	905	6	+	Pisum sativum	cis-acting regulatory element involved in light responsiveness	light response
MsNAC52	G-Box	CACGTG	937	6	+	Pisum sativum	cis-acting regulatory element involved in light responsiveness	light response
MsNAC52	G-Box	CACGTG	956	6	+	Pisum sativum	cis-acting regulatory element involved in light responsiveness	light response
MsNAC52	G-box	ACACGTGT	694	8	+	Brassica napus	cis-acting regulatory element involved in light responsiveness	light response
MsNAC52	G-box	CACGTG	695	6	+	Arabidopsis thaliana	cis-acting regulatory element involved in light responsiveness	light response
MsNAC52	G-box	CACGTG	726	6	+	Arabidopsis thaliana	cis-acting regulatory element involved in light responsiveness	light response
MsNAC52	G-box	CACGTG	905	6	+	Arabidopsis thaliana	cis-acting regulatory element involved in light responsiveness	light response
MsNAC52	G-box	ACACGTGT	936	8	+	Brassica napus	cis-acting regulatory element involved in light responsiveness	light response
MsNAC52	G-box	CACGTG	937	6	+	Arabidopsis thaliana	cis-acting regulatory element involved in light responsiveness	light response
MsNAC52	G-box	ACACGTGT	955	8	+	Brassica napus	cis-acting regulatory element involved in light responsiveness	light response
MsNAC52	G-box	CACGTG	956	6	+	Arabidopsis thaliana	cis-acting regulatory element involved in light responsiveness	light response
MsNAC52	G-box	TACGTG	1507	6	-	Arabidopsis thaliana	cis-acting regulatory element involved in light responsiveness	light response
MsNAC53	G-box	GCCACGTGGA	123	9	-	Arabidopsis thaliana	cis-acting regulatory element involved in light responsiveness	light response
MsNAC53	G-box	CACGTG	125	6	+	Arabidopsis thaliana	cis-acting regulatory element involved in light responsiveness	light response
MsNAC53	G-box	TAAACGTG	1104	8	+	Brassica oleracea	cis-acting regulatory element involved in light responsiveness	light response
MsNAC53	G-box	TACGTG	1134	6	-	Arabidopsis thaliana	cis-acting regulatory element involved in light responsiveness	light response
MsNAC53	G-box	TACGTG	1138	6	+	Arabidopsis thaliana	cis-acting regulatory element involved in light responsiveness	light response
MsNAC53	G-box	CACGTC	1648	6	-	Zea mays	cis-acting regulatory element involved in light responsiveness	light response
MsNAC53	G-Box	CACGTG	125	6	+	Pisum sativum	cis-acting regulatory element involved in light responsiveness	light response
MsNAC53	G-Box	CACGTT	1106	6	-	Pisum sativum	cis-acting regulatory element involved in light responsiveness	light response
MsNAC54	G-Box	CACGTG	898	6	+	Pisum sativum	cis-acting regulatory element involved in light responsiveness	light response
MsNAC54	G-Box	CACGTG	1046	6	-	Pisum sativum	cis-acting regulatory element involved in light responsiveness	light response
MsNAC54	G-Box	CACGTG	1062	6	-	Pisum sativum	cis-acting regulatory element involved in light responsiveness	light response
MsNAC54	G-Box	CACGTG	1187	6	-	Pisum sativum	cis-acting regulatory element involved in light responsiveness	light response
MsNAC54	G-box	ACACGTGT	897	8	+	Brassica napus	cis-acting regulatory element involved in light responsiveness	light response
MsNAC54	G-box	CACGTG	898	6	+	Arabidopsis thaliana	cis-acting regulatory element involved in light responsiveness	light response
MsNAC54	G-box	ACACGTGT	1045	8	-	Brassica napus	cis-acting regulatory element involved in light responsiveness	light response
MsNAC54	G-box	CACGTG	1046	6	-	Arabidopsis thaliana	cis-acting regulatory element involved in light responsiveness	light response
MsNAC54	G-box	ACACGTG(G/t)CACC	1057	10.5	-	Lycopersicon esculentum	cis-acting regulatory element involved in light responsiveness	light response
MsNAC54	G-box	ACACGTGT	1061	8	-	Brassica napus	cis-acting regulatory element involved in light responsiveness	light response
MsNAC54	G-box	CACGTG	1062	6	-	Arabidopsis thaliana	cis-acting regulatory element involved in light responsiveness	light response
MsNAC54	G-box	GCCACGTGGA	1185	9	-	Arabidopsis thaliana	cis-acting regulatory element involved in light responsiveness	light response
MsNAC54	G-box	ACACGTGGC	1186	9	+	Brassica napus	cis-acting regulatory element involved in light responsiveness	light response
MsNAC54	G-box	CACGTG	1187	6	-	Arabidopsis thaliana	cis-acting regulatory element involved in light responsiveness	light response
MsNAC54	G-box	TACGTG	1623	6	-	Arabidopsis thaliana	cis-acting regulatory element involved in light responsiveness	light response
MsNAC55	G-box	CACGTC	308	6	+	Zea mays	cis-acting regulatory element involved in light responsiveness	light response
MsNAC56	G-Box	CACGTG	560	6	+	Pisum sativum	cis-acting regulatory element involved in light responsiveness	light response
MsNAC56	G-box	ACACGTGT	559	8	+	Brassica napus	cis-acting regulatory element involved in light responsiveness	light response
MsNAC56	G-box	CACGTG	560	6	+	Arabidopsis thaliana	cis-acting regulatory element involved in light responsiveness	light response
MsNAC57	G-Box	CACGTG	244	6	+	Pisum sativum	cis-acting regulatory element involved in light responsiveness	light response
MsNAC57	G-Box	CACGTT	918	6	+	Pisum sativum	cis-acting regulatory element involved in light responsiveness	light response
MsNAC57	G-Box	CACGTT	1854	6	-	Pisum sativum	cis-acting regulatory element involved in light responsiveness	light response
MsNAC57	G-box	CACGTG	244	6	+	Arabidopsis thaliana	cis-acting regulatory element involved in light responsiveness	light response
MsNAC57	G-box	CACGAC	517	6	+	Zea mays	cis-acting regulatory element involved in light responsiveness	light response
MsNAC57	G-box	TAAACGTG	918	8	-	Brassica oleracea	cis-acting regulatory element involved in light responsiveness	light response
MsNAC57	G-box	TACGTG	924	6	+	Arabidopsis thaliana	cis-acting regulatory element involved in light responsiveness	light response
MsNAC58	G-Box	CACGTT	286	6	-	Pisum sativum	cis-acting regulatory element involved in light responsiveness	light response
MsNAC58	G-Box	CACGTT	840	6	+	Pisum sativum	cis-acting regulatory element involved in light responsiveness	light response
MsNAC59	G-Box	CACGTG	335	6	+	Pisum sativum	cis-acting regulatory element involved in light responsiveness	light response
MsNAC59	G-box	CACGTG	335	6	+	Arabidopsis thaliana	cis-acting regulatory element involved in light responsiveness	light response
MsNAC6	G-box	TACGTG	278	6	+	Arabidopsis thaliana	cis-acting regulatory element involved in light responsiveness	light response
MsNAC6	G-box	TACGTG	1499	6	+	Arabidopsis thaliana	cis-acting regulatory element involved in light responsiveness	light response
MsNAC6	G-Box	CACGTT	1269	6	+	Pisum sativum	cis-acting regulatory element involved in light responsiveness	light response
MsNAC60	G-box	CACGTC	370	6	+	Zea mays	cis-acting regulatory element involved in light responsiveness	light response
MsNAC60	G-box	TACGTG	837	6	+	Arabidopsis thaliana	cis-acting regulatory element involved in light responsiveness	light response
MsNAC60	G-box	CACGAC	1525	6	+	Zea mays	cis-acting regulatory element involved in light responsiveness	light response
MsNAC60	G-box	CACGAC	1718	6	+	Zea mays	cis-acting regulatory element involved in light responsiveness	light response
MsNAC61	G-box	CACGAC	41	6	-	Zea mays	cis-acting regulatory element involved in light responsiveness	light response
MsNAC61	G-box	CACGTG	988	6	+	Arabidopsis thaliana	cis-acting regulatory element involved in light responsiveness	light response
MsNAC61	G-box	CACGTC	1223	6	-	Zea mays	cis-acting regulatory element involved in light responsiveness	light response
MsNAC61	G-box	CACGTC	1865	6	+	Zea mays	cis-acting regulatory element involved in light responsiveness	light response
MsNAC61	G-box	CACGTC	1910	6	+	Zea mays	cis-acting regulatory element involved in light responsiveness	light response
MsNAC61	G-box	CACGTC	1923	6	+	Zea mays	cis-acting regulatory element involved in light responsiveness	light response
MsNAC61	G-Box	CACGTG	988	6	+	Pisum sativum	cis-acting regulatory element involved in light responsiveness	light response
MsNAC62	G-box	ACACGTGT	174	8	+	Brassica napus	cis-acting regulatory element involved in light responsiveness	light response
MsNAC62	G-box	CACGTG	175	6	+	Arabidopsis thaliana	cis-acting regulatory element involved in light responsiveness	light response
MsNAC62	G-box	CACGAC	180	6	-	Zea mays	cis-acting regulatory element involved in light responsiveness	light response
MsNAC62	G-box	ACACGTGT	631	8	+	Brassica napus	cis-acting regulatory element involved in light responsiveness	light response
MsNAC62	G-box	CACGTG	632	6	+	Arabidopsis thaliana	cis-acting regulatory element involved in light responsiveness	light response
MsNAC62	G-Box	CACGTG	175	6	+	Pisum sativum	cis-acting regulatory element involved in light responsiveness	light response
MsNAC62	G-Box	CACGTG	632	6	+	Pisum sativum	cis-acting regulatory element involved in light responsiveness	light response
MsNAC63	G-Box	CACGTG	1107	6	-	Pisum sativum	cis-acting regulatory element involved in light responsiveness	light response
MsNAC63	G-Box	CACGTT	1497	6	-	Pisum sativum	cis-acting regulatory element involved in light responsiveness	light response
MsNAC63	G-Box	CACGTG	1590	6	-	Pisum sativum	cis-acting regulatory element involved in light responsiveness	light response
MsNAC63	G-Box	CACGTG	1641	6	-	Pisum sativum	cis-acting regulatory element involved in light responsiveness	light response
MsNAC63	G-Box	CACGTG	1737	6	-	Pisum sativum	cis-acting regulatory element involved in light responsiveness	light response
MsNAC63	G-Box	CACGTG	1863	6	-	Pisum sativum	cis-acting regulatory element involved in light responsiveness	light response
MsNAC63	G-box	CACGAC	8	6	+	Zea mays	cis-acting regulatory element involved in light responsiveness	light response
MsNAC63	G-box	CACGTG	1107	6	-	Arabidopsis thaliana	cis-acting regulatory element involved in light responsiveness	light response
MsNAC63	G-box	TACGTG	1315	6	-	Arabidopsis thaliana	cis-acting regulatory element involved in light responsiveness	light response
MsNAC63	G-box	CACGTG	1590	6	-	Arabidopsis thaliana	cis-acting regulatory element involved in light responsiveness	light response
MsNAC63	G-box	TAACACGTAG	1626	9	-	Brassica oleracea	cis-acting regulatory element involved in light responsiveness	light response
MsNAC63	G-box	CACGTC	1627	6	-	Zea mays	cis-acting regulatory element involved in light responsiveness	light response
MsNAC63	G-box	CACGTG	1641	6	-	Arabidopsis thaliana	cis-acting regulatory element involved in light responsiveness	light response
MsNAC63	G-box	ACACGTGT	1736	8	-	Brassica napus	cis-acting regulatory element involved in light responsiveness	light response
MsNAC63	G-box	CACGTG	1737	6	-	Arabidopsis thaliana	cis-acting regulatory element involved in light responsiveness	light response
MsNAC63	G-box	ACACGTG(G/t)CACC	1858	10.5	-	Lycopersicon esculentum	cis-acting regulatory element involved in light responsiveness	light response
MsNAC63	G-box	ACACGTGT	1862	8	-	Brassica napus	cis-acting regulatory element involved in light responsiveness	light response
MsNAC63	G-box	CACGTG	1863	6	-	Arabidopsis thaliana	cis-acting regulatory element involved in light responsiveness	light response
MsNAC64	G-box	TACGTG	137	6	-	Arabidopsis thaliana	cis-acting regulatory element involved in light responsiveness	light response
MsNAC64	G-box	TAACACGTAG	710	9	+	Brassica oleracea	cis-acting regulatory element involved in light responsiveness	light response
MsNAC64	G-box	TACGTG	1169	6	-	Arabidopsis thaliana	cis-acting regulatory element involved in light responsiveness	light response
MsNAC64	G-box	TACGTG	1185	6	-	Arabidopsis thaliana	cis-acting regulatory element involved in light responsiveness	light response
MsNAC65	G-Box	CACGTG	982	6	+	Pisum sativum	cis-acting regulatory element involved in light responsiveness	light response
MsNAC65	G-Box	CACGTT	1451	6	-	Pisum sativum	cis-acting regulatory element involved in light responsiveness	light response
MsNAC65	G-box	CACGAC	146	6	-	Zea mays	cis-acting regulatory element involved in light responsiveness	light response
MsNAC65	G-box	CACGTG	982	6	+	Arabidopsis thaliana	cis-acting regulatory element involved in light responsiveness	light response
MsNAC65	G-box	CACGTC	1732	6	-	Zea mays	cis-acting regulatory element involved in light responsiveness	light response
MsNAC66	G-box	TACGTG	440	6	+	Arabidopsis thaliana	cis-acting regulatory element involved in light responsiveness	light response
MsNAC66	G-box	tgACACGTGGCA	773	12	-	Lycopersicon esculentum	cis-acting regulatory element involved in light responsiveness	light response
MsNAC66	G-box	ACACGTGGC	774	9	-	Brassica napus	cis-acting regulatory element involved in light responsiveness	light response
MsNAC66	G-box	CACGTG	776	6	+	Arabidopsis thaliana	cis-acting regulatory element involved in light responsiveness	light response
MsNAC66	G-Box	CACGTG	776	6	+	Pisum sativum	cis-acting regulatory element involved in light responsiveness	light response
MsNAC67	G-Box	CACGTG	1346	6	-	Pisum sativum	cis-acting regulatory element involved in light responsiveness	light response
MsNAC67	G-Box	CACGTT	1917	6	-	Pisum sativum	cis-acting regulatory element involved in light responsiveness	light response
MsNAC67	G-box	CACGAC	357	6	+	Zea mays	cis-acting regulatory element involved in light responsiveness	light response
MsNAC67	G-box	CACGTG	1346	6	-	Arabidopsis thaliana	cis-acting regulatory element involved in light responsiveness	light response
MsNAC67	G-box	TACGTG	1661	6	-	Arabidopsis thaliana	cis-acting regulatory element involved in light responsiveness	light response
MsNAC68	G-box	TACGTG	199	6	-	Arabidopsis thaliana	cis-acting regulatory element involved in light responsiveness	light response
MsNAC69	G-Box	CACGTG	1445	6	-	Pisum sativum	cis-acting regulatory element involved in light responsiveness	light response
MsNAC69	G-Box	CACGTG	1849	6	-	Pisum sativum	cis-acting regulatory element involved in light responsiveness	light response
MsNAC69	G-box	CACGTC	7	6	-	Zea mays	cis-acting regulatory element involved in light responsiveness	light response
MsNAC69	G-box	CACGAC	948	6	-	Zea mays	cis-acting regulatory element involved in light responsiveness	light response
MsNAC69	G-box	CACGAC	998	6	-	Zea mays	cis-acting regulatory element involved in light responsiveness	light response
MsNAC69	G-box	CACGTC	1271	6	-	Zea mays	cis-acting regulatory element involved in light responsiveness	light response
MsNAC69	G-box	TACGTG	1425	6	+	Arabidopsis thaliana	cis-acting regulatory element involved in light responsiveness	light response
MsNAC69	G-box	CACGTG	1445	6	-	Arabidopsis thaliana	cis-acting regulatory element involved in light responsiveness	light response
MsNAC69	G-box	TAACACGTAG	1846	9	+	Brassica oleracea	cis-acting regulatory element involved in light responsiveness	light response
MsNAC69	G-box	ACACGTGGC	1848	9	+	Brassica napus	cis-acting regulatory element involved in light responsiveness	light response
MsNAC69	G-box	CACGTG	1849	6	-	Arabidopsis thaliana	cis-acting regulatory element involved in light responsiveness	light response
MsNAC7	G-Box	CACGTT	1680	6	+	Pisum sativum	cis-acting regulatory element involved in light responsiveness	light response
MsNAC70	G-box	CACGAC	765	6	+	Zea mays	cis-acting regulatory element involved in light responsiveness	light response
MsNAC70	G-box	TACGTG	928	6	-	Arabidopsis thaliana	cis-acting regulatory element involved in light responsiveness	light response
MsNAC70	G-box	TACGTG	1116	6	+	Arabidopsis thaliana	cis-acting regulatory element involved in light responsiveness	light response
MsNAC70	G-box	CACGTC	1914	6	-	Zea mays	cis-acting regulatory element involved in light responsiveness	light response
MsNAC70	G-box	TACGTG	1922	6	-	Arabidopsis thaliana	cis-acting regulatory element involved in light responsiveness	light response
MsNAC71	G-box	CACGTC	468	6	-	Zea mays	cis-acting regulatory element involved in light responsiveness	light response
MsNAC71	G-box	CACGTG	594	6	+	Arabidopsis thaliana	cis-acting regulatory element involved in light responsiveness	light response
MsNAC71	G-box	CACGAC	654	6	-	Zea mays	cis-acting regulatory element involved in light responsiveness	light response
MsNAC71	G-box	CACGTG	773	6	+	Arabidopsis thaliana	cis-acting regulatory element involved in light responsiveness	light response
MsNAC71	G-box	TACGTG	866	6	-	Arabidopsis thaliana	cis-acting regulatory element involved in light responsiveness	light response
MsNAC71	G-box	TAACACGTAG	944	9	+	Brassica oleracea	cis-acting regulatory element involved in light responsiveness	light response
MsNAC71	G-box	TACGTG	947	6	-	Arabidopsis thaliana	cis-acting regulatory element involved in light responsiveness	light response
MsNAC71	G-box	CACGTC	982	6	+	Zea mays	cis-acting regulatory element involved in light responsiveness	light response
MsNAC71	G-box	ACACGTGT	1090	8	-	Brassica napus	cis-acting regulatory element involved in light responsiveness	light response
MsNAC71	G-box	CACGTG	1091	6	-	Arabidopsis thaliana	cis-acting regulatory element involved in light responsiveness	light response
MsNAC71	G-box	TACGTG	1111	6	-	Arabidopsis thaliana	cis-acting regulatory element involved in light responsiveness	light response
MsNAC71	G-box	TACGTG	1126	6	+	Arabidopsis thaliana	cis-acting regulatory element involved in light responsiveness	light response
MsNAC71	G-Box	CACGTG	594	6	+	Pisum sativum	cis-acting regulatory element involved in light responsiveness	light response
MsNAC71	G-Box	CACGTG	773	6	+	Pisum sativum	cis-acting regulatory element involved in light responsiveness	light response
MsNAC71	G-Box	CACGTT	858	6	+	Pisum sativum	cis-acting regulatory element involved in light responsiveness	light response
MsNAC71	G-Box	CACGTG	1091	6	-	Pisum sativum	cis-acting regulatory element involved in light responsiveness	light response
MsNAC72	G-box	TAACACGTAG	463	9	-	Brassica oleracea	cis-acting regulatory element involved in light responsiveness	light response
MsNAC72	G-box	TACGTG	464	6	+	Arabidopsis thaliana	cis-acting regulatory element involved in light responsiveness	light response
MsNAC72	G-box	GCCACGTGGA	1366	9	+	Arabidopsis thaliana	cis-acting regulatory element involved in light responsiveness	light response
MsNAC72	G-box	CACGTG	1368	6	-	Arabidopsis thaliana	cis-acting regulatory element involved in light responsiveness	light response
MsNAC72	G-box	CACGTC	1977	6	-	Zea mays	cis-acting regulatory element involved in light responsiveness	light response
MsNAC72	G-Box	CACGTG	1368	6	-	Pisum sativum	cis-acting regulatory element involved in light responsiveness	light response
MsNAC73	G-Box	CACGTG	506	6	+	Pisum sativum	cis-acting regulatory element involved in light responsiveness	light response
MsNAC73	G-Box	CACGTG	539	6	+	Pisum sativum	cis-acting regulatory element involved in light responsiveness	light response
MsNAC73	G-Box	CACGTG	634	6	+	Pisum sativum	cis-acting regulatory element involved in light responsiveness	light response
MsNAC73	G-Box	CACGTG	935	6	+	Pisum sativum	cis-acting regulatory element involved in light responsiveness	light response
MsNAC73	G-Box	CACGTT	946	6	+	Pisum sativum	cis-acting regulatory element involved in light responsiveness	light response
MsNAC73	G-Box	CACGTG	988	6	+	Pisum sativum	cis-acting regulatory element involved in light responsiveness	light response
MsNAC73	G-Box	CACGTT	1012	6	+	Pisum sativum	cis-acting regulatory element involved in light responsiveness	light response
MsNAC73	G-Box	CACGTG	1378	6	-	Pisum sativum	cis-acting regulatory element involved in light responsiveness	light response
MsNAC73	G-Box	CACGTG	1603	6	-	Pisum sativum	cis-acting regulatory element involved in light responsiveness	light response
MsNAC73	G-box	CACGAC	21	6	+	Zea mays	cis-acting regulatory element involved in light responsiveness	light response
MsNAC73	G-box	CACGTC	268	6	-	Zea mays	cis-acting regulatory element involved in light responsiveness	light response
MsNAC73	G-box	CACGTC	361	6	+	Zea mays	cis-acting regulatory element involved in light responsiveness	light response
MsNAC73	G-box	CACGTG	506	6	+	Arabidopsis thaliana	cis-acting regulatory element involved in light responsiveness	light response
MsNAC73	G-box	ACACGTGT	538	8	+	Brassica napus	cis-acting regulatory element involved in light responsiveness	light response
MsNAC73	G-box	CACGTG	539	6	+	Arabidopsis thaliana	cis-acting regulatory element involved in light responsiveness	light response
MsNAC73	G-box	ACACGTGT	633	8	+	Brassica napus	cis-acting regulatory element involved in light responsiveness	light response
MsNAC73	G-box	CACGTG	634	6	+	Arabidopsis thaliana	cis-acting regulatory element involved in light responsiveness	light response
MsNAC73	G-box	CACGTG	935	6	+	Arabidopsis thaliana	cis-acting regulatory element involved in light responsiveness	light response
MsNAC73	G-box	ACACGTGT	987	8	+	Brassica napus	cis-acting regulatory element involved in light responsiveness	light response
MsNAC73	G-box	CACGTG	988	6	+	Arabidopsis thaliana	cis-acting regulatory element involved in light responsiveness	light response
MsNAC73	G-box	TAACACGTAG	1375	9	+	Brassica oleracea	cis-acting regulatory element involved in light responsiveness	light response
MsNAC73	G-box	ACACGTGGC	1377	9	+	Brassica napus	cis-acting regulatory element involved in light responsiveness	light response
MsNAC73	G-box	CACGTG	1378	6	-	Arabidopsis thaliana	cis-acting regulatory element involved in light responsiveness	light response
MsNAC73	G-box	CACGTG	1603	6	-	Arabidopsis thaliana	cis-acting regulatory element involved in light responsiveness	light response
MsNAC74	G-box	GCCACGTGGA	238	9	+	Arabidopsis thaliana	cis-acting regulatory element involved in light responsiveness	light response
MsNAC74	G-box	CACGTG	240	6	+	Arabidopsis thaliana	cis-acting regulatory element involved in light responsiveness	light response
MsNAC74	G-box	ACACGTGT	486	8	+	Brassica napus	cis-acting regulatory element involved in light responsiveness	light response
MsNAC74	G-box	CACGTG	487	6	+	Arabidopsis thaliana	cis-acting regulatory element involved in light responsiveness	light response
MsNAC74	G-box	TACGTG	719	6	-	Arabidopsis thaliana	cis-acting regulatory element involved in light responsiveness	light response
MsNAC74	G-box	CACGTG	804	6	+	Arabidopsis thaliana	cis-acting regulatory element involved in light responsiveness	light response
MsNAC74	G-box	TACGTG	1888	6	+	Arabidopsis thaliana	cis-acting regulatory element involved in light responsiveness	light response
MsNAC78	G-Box	CACGTG	123	6	+	Pisum sativum	cis-acting regulatory element involved in light responsiveness	light response
MsNAC78	G-Box	CACGTG	381	6	+	Pisum sativum	cis-acting regulatory element involved in light responsiveness	light response
MsNAC78	G-box	GCCACGTGGA	121	9	-	Arabidopsis thaliana	cis-acting regulatory element involved in light responsiveness	light response
MsNAC78	G-box	ACACGTGGC	122	9	+	Brassica napus	cis-acting regulatory element involved in light responsiveness	light response
MsNAC78	G-box	CACGTG	123	6	+	Arabidopsis thaliana	cis-acting regulatory element involved in light responsiveness	light response
MsNAC78	G-box	ACACGTG(G/t)CACC	376	11.5	-	Lycopersicon esculentum	cis-acting regulatory element involved in light responsiveness	light response
MsNAC78	G-box	tgACACGTGGCA	378	11	-	Lycopersicon esculentum	cis-acting regulatory element involved in light responsiveness	light response
MsNAC78	G-box	GCCACGTGGA	379	9	+	Arabidopsis thaliana	cis-acting regulatory element involved in light responsiveness	light response
MsNAC78	G-box	CACGTG	381	6	+	Arabidopsis thaliana	cis-acting regulatory element involved in light responsiveness	light response
MsNAC78	G-box	TACGTG	1381	6	-	Arabidopsis thaliana	cis-acting regulatory element involved in light responsiveness	light response
MsNAC78	G-box	CACGAC	1754	6	+	Zea mays	cis-acting regulatory element involved in light responsiveness	light response
MsNAC79	G-Box	CACGTGAAA	1180	9	-	Pisum sativum	cis-acting regulatory element involved in light responsiveness	light response
MsNAC79	G-Box	CACGTG	1183	6	-	Pisum sativum	cis-acting regulatory element involved in light responsiveness	light response
MsNAC79	G-Box	CACGTT	1255	6	+	Pisum sativum	cis-acting regulatory element involved in light responsiveness	light response
MsNAC79	G-box	CACGTG	1183	6	-	Arabidopsis thaliana	cis-acting regulatory element involved in light responsiveness	light response
MsNAC79	G-box	TACGTG	1693	6	+	Arabidopsis thaliana	cis-acting regulatory element involved in light responsiveness	light response
MsNAC79	G-box	CACGAC	1925	6	-	Zea mays	cis-acting regulatory element involved in light responsiveness	light response
MsNAC79	G-box	CACGTC	1990	6	-	Zea mays	cis-acting regulatory element involved in light responsiveness	light response
MsNAC8	G-box	ACACGTG(G/t)CACC	720	10.5	-	Lycopersicon esculentum	cis-acting regulatory element involved in light responsiveness	light response
MsNAC8	G-box	ACACGTGT	1498	8	-	Brassica napus	cis-acting regulatory element involved in light responsiveness	light response
MsNAC8	G-box	CACGTG	1499	6	-	Arabidopsis thaliana	cis-acting regulatory element involved in light responsiveness	light response
MsNAC8	G-box	tgACACGTGGCA	1665	11	-	Lycopersicon esculentum	cis-acting regulatory element involved in light responsiveness	light response
MsNAC8	G-box	ACACGTGGC	1666	9	-	Brassica napus	cis-acting regulatory element involved in light responsiveness	light response
MsNAC8	G-box	CACGTG	1668	6	-	Arabidopsis thaliana	cis-acting regulatory element involved in light responsiveness	light response
MsNAC8	G-box	CACGTG	1767	6	-	Arabidopsis thaliana	cis-acting regulatory element involved in light responsiveness	light response
MsNAC8	G-box	TACGTG	1880	6	+	Arabidopsis thaliana	cis-acting regulatory element involved in light responsiveness	light response
MsNAC8	G-box	TACGTG	1935	6	+	Arabidopsis thaliana	cis-acting regulatory element involved in light responsiveness	light response
MsNAC8	G-Box	CACGTG	1499	6	-	Pisum sativum	cis-acting regulatory element involved in light responsiveness	light response
MsNAC8	G-Box	CACGTG	1668	6	-	Pisum sativum	cis-acting regulatory element involved in light responsiveness	light response
MsNAC8	G-Box	CACGTG	1767	6	-	Pisum sativum	cis-acting regulatory element involved in light responsiveness	light response
MsNAC80	G-Box	CACGTT	146	6	-	Pisum sativum	cis-acting regulatory element involved in light responsiveness	light response
MsNAC80	G-box	CACGTC	1668	6	+	Zea mays	cis-acting regulatory element involved in light responsiveness	light response
MsNAC81	G-Box	CACGTT	1497	6	+	Pisum sativum	cis-acting regulatory element involved in light responsiveness	light response
MsNAC81	G-box	TACGTG	1509	6	-	Arabidopsis thaliana	cis-acting regulatory element involved in light responsiveness	light response
MsNAC85	G-box	CACGTG	18	6	+	Arabidopsis thaliana	cis-acting regulatory element involved in light responsiveness	light response
MsNAC85	G-box	CACGTC	516	6	-	Zea mays	cis-acting regulatory element involved in light responsiveness	light response
MsNAC85	G-Box	CACGTG	18	6	+	Pisum sativum	cis-acting regulatory element involved in light responsiveness	light response
MsNAC86	G-box	CACGTC	837	6	-	Zea mays	cis-acting regulatory element involved in light responsiveness	light response
MsNAC86	G-box	CACGTC	1703	6	-	Zea mays	cis-acting regulatory element involved in light responsiveness	light response
MsNAC88	G-box	CACGAC	40	6	+	Zea mays	cis-acting regulatory element involved in light responsiveness	light response
MsNAC88	G-box	TACGTG	235	6	+	Arabidopsis thaliana	cis-acting regulatory element involved in light responsiveness	light response
MsNAC88	G-box	TACGTG	251	6	+	Arabidopsis thaliana	cis-acting regulatory element involved in light responsiveness	light response
MsNAC88	G-box	CACGTC	1591	6	+	Zea mays	cis-acting regulatory element involved in light responsiveness	light response
MsNAC89	G-box	CACGTC	1904	6	+	Zea mays	cis-acting regulatory element involved in light responsiveness	light response
MsNAC89	G-Box	TCCACATGGCA	1676	10	-	Triticum aestivum	cis-acting regulatory element involved in light responsiveness	light response
MsNAC9	G-box	CACGTC	1695	6	-	Zea mays	cis-acting regulatory element involved in light responsiveness	light response
MsNAC9	G-box	CACGTC	1722	6	-	Zea mays	cis-acting regulatory element involved in light responsiveness	light response
MsNAC9	G-box	CACGAC	1907	6	+	Zea mays	cis-acting regulatory element involved in light responsiveness	light response
MsNAC90	G-box	TACGTG	1325	6	+	Arabidopsis thaliana	cis-acting regulatory element involved in light responsiveness	light response
MsNAC91	G-Box	CACGTT	814	6	-	Pisum sativum	cis-acting regulatory element involved in light responsiveness	light response
MsNAC91	G-box	TACGTG	1425	6	+	Arabidopsis thaliana	cis-acting regulatory element involved in light responsiveness	light response
MsNAC91	G-box	CACGAC	1792	6	+	Zea mays	cis-acting regulatory element involved in light responsiveness	light response
MsNAC92	G-Box	CACGTT	949	6	+	Pisum sativum	cis-acting regulatory element involved in light responsiveness	light response
MsNAC92	G-Box	CACGTT	1856	6	-	Pisum sativum	cis-acting regulatory element involved in light responsiveness	light response
MsNAC92	G-box	TAAACGTG	949	8	-	Brassica oleracea	cis-acting regulatory element involved in light responsiveness	light response
MsNAC93	G-box	TACGTG	51	6	+	Arabidopsis thaliana	cis-acting regulatory element involved in light responsiveness	light response
MsNAC93	G-box	GCCACGTGGA	252	9	+	Arabidopsis thaliana	cis-acting regulatory element involved in light responsiveness	light response
MsNAC93	G-box	CACGTC	1355	6	+	Zea mays	cis-acting regulatory element involved in light responsiveness	light response
MsNAC93	G-box	CACGTG	1487	6	-	Arabidopsis thaliana	cis-acting regulatory element involved in light responsiveness	light response
MsNAC93	G-box	CACGTC	1639	6	+	Zea mays	cis-acting regulatory element involved in light responsiveness	light response
MsNAC93	G-Box	TCCACATGGCA	251	11	-	Triticum aestivum	cis-acting regulatory element involved in light responsiveness	light response
MsNAC93	G-Box	CACGTG	1487	6	-	Pisum sativum	cis-acting regulatory element involved in light responsiveness	light response
MsNAC94	G-Box	CACGTT	1060	6	-	Pisum sativum	cis-acting regulatory element involved in light responsiveness	light response
MsNAC94	G-Box	CACGTG	1304	6	-	Pisum sativum	cis-acting regulatory element involved in light responsiveness	light response
MsNAC94	G-box	ACACGTGT	1303	8	-	Brassica napus	cis-acting regulatory element involved in light responsiveness	light response
MsNAC94	G-box	CACGTG	1304	6	-	Arabidopsis thaliana	cis-acting regulatory element involved in light responsiveness	light response
MsNAC94	G-box	CACGAC	1415	6	-	Zea mays	cis-acting regulatory element involved in light responsiveness	light response
MsNAC95	G-Box	CACGTG	1378	6	-	Pisum sativum	cis-acting regulatory element involved in light responsiveness	light response
MsNAC95	G-box	CACGTC	188	6	+	Zea mays	cis-acting regulatory element involved in light responsiveness	light response
MsNAC95	G-box	GCCACGTGGA	1376	9	+	Arabidopsis thaliana	cis-acting regulatory element involved in light responsiveness	light response
MsNAC95	G-box	CACGTG	1378	6	-	Arabidopsis thaliana	cis-acting regulatory element involved in light responsiveness	light response
MsNAC95	G-box	TACGTG	1767	6	+	Arabidopsis thaliana	cis-acting regulatory element involved in light responsiveness	light response
MsNAC96	G-box	CACGTC	1106	6	+	Zea mays	cis-acting regulatory element involved in light responsiveness	light response
MsNAC1	ACE	GACACGTATG	1733	9	+	Petroselinum crispum	cis-acting element involved in light responsiveness	light response
MsNAC17	ACE	GACACGTATG	276	9	-	Petroselinum crispum	cis-acting element involved in light responsiveness	light response
MsNAC26	ACE	CTAACGTATT	1956	9	+	Petroselinum crispum	cis-acting element involved in light responsiveness	light response
MsNAC30	ACE	GACACGTATG	49	9	-	Petroselinum crispum	cis-acting element involved in light responsiveness	light response
MsNAC30	ACE	GACACGTATG	1175	9	-	Petroselinum crispum	cis-acting element involved in light responsiveness	light response
MsNAC44	ACE	CTAACGTATT	830	9	+	Petroselinum crispum	cis-acting element involved in light responsiveness	light response
MsNAC44	ACE	CTAACGTATT	1153	9	+	Petroselinum crispum	cis-acting element involved in light responsiveness	light response
MsNAC54	ACE	GACACGTATG	152	9	-	Petroselinum crispum	cis-acting element involved in light responsiveness	light response
MsNAC54	ACE	CTAACGTATT	710	9	-	Petroselinum crispum	cis-acting element involved in light responsiveness	light response
MsNAC54	ACE	GACACGTATG	1060	9	+	Petroselinum crispum	cis-acting element involved in light responsiveness	light response
MsNAC54	ACE	GACACGTATG	1621	9	+	Petroselinum crispum	cis-acting element involved in light responsiveness	light response
MsNAC56	ACE	GACACGTATG	558	9	+	Petroselinum crispum	cis-acting element involved in light responsiveness	light response
MsNAC63	ACE	CTAACGTATT	768	9	-	Petroselinum crispum	cis-acting element involved in light responsiveness	light response
MsNAC71	ACE	GACACGTATG	864	10	+	Petroselinum crispum	cis-acting element involved in light responsiveness	light response
MsNAC71	ACE	GACACGTATG	1124	9	-	Petroselinum crispum	cis-acting element involved in light responsiveness	light response
MsNAC74	ACE	GCGACGTACC	36	10	-	Petroselinum crispum	cis-acting element involved in light responsiveness	light response
MsNAC78	ACE	CTAACGTATT	1023	9	-	Petroselinum crispum	cis-acting element involved in light responsiveness	light response
MsNAC8	ACE	CTAACGTATT	1332	9	-	Petroselinum crispum	cis-acting element involved in light responsiveness	light response
MsNAC84	ACE	CTAACGTATT	1799	9	+	Petroselinum crispum	cis-acting element involved in light responsiveness	light response
MsNAC93	ACE	GACACGTATG	49	9	-	Petroselinum crispum	cis-acting element involved in light responsiveness	light response
MsNAC94	ACE	GACACGTATG	925	9	-	Petroselinum crispum	cis-acting element involved in light responsiveness	light response
MsNAC12	GARE-motif	TCTGTTG	1309	7	-	Brassica oleracea	gibberellin-responsive element	gibberellin response
MsNAC13	GARE-motif	TCTGTTG	112	7	-	Brassica oleracea	gibberellin-responsive element	gibberellin response
MsNAC13	GARE-motif	TCTGTTG	462	7	+	Brassica oleracea	gibberellin-responsive element	gibberellin response
MsNAC15	GARE-motif	TCTGTTG	1582	7	+	Brassica oleracea	gibberellin-responsive element	gibberellin response
MsNAC15	GARE-motif	TCTGTTG	1957	7	-	Brassica oleracea	gibberellin-responsive element	gibberellin response
MsNAC16	P-box	CCTTTTG	144	7	-	Oryza sativa	gibberellin-responsive element	gibberellin response
MsNAC16	P-box	CCTTTTG	1686	7	-	Oryza sativa	gibberellin-responsive element	gibberellin response
MsNAC17	P-box	CCTTTTG	121	7	-	Oryza sativa	gibberellin-responsive element	gibberellin response
MsNAC19	GARE-motif	TCTGTTG	403	7	+	Brassica oleracea	gibberellin-responsive element	gibberellin response
MsNAC20	GARE-motif	TCTGTTG	1545	7	+	Brassica oleracea	gibberellin-responsive element	gibberellin response
MsNAC20	GARE-motif	TCTGTTG	1831	7	+	Brassica oleracea	gibberellin-responsive element	gibberellin response
MsNAC26	GARE-motif	TCTGTTG	1366	7	-	Brassica oleracea	gibberellin-responsive element	gibberellin response
MsNAC26	GARE-motif	TCTGTTG	1838	7	+	Brassica oleracea	gibberellin-responsive element	gibberellin response
MsNAC27	GARE-motif	TCTGTTG	163	7	-	Brassica oleracea	gibberellin-responsive element	gibberellin response
MsNAC27	P-box	CCTTTTG	1696	7	-	Oryza sativa	gibberellin-responsive element	gibberellin response
MsNAC28	GARE-motif	TCTGTTG	766	7	+	Brassica oleracea	gibberellin-responsive element	gibberellin response
MsNAC28	P-box	CCTTTTG	1356	7	-	Oryza sativa	gibberellin-responsive element	gibberellin response
MsNAC29	GARE-motif	TCTGTTG	1916	7	+	Brassica oleracea	gibberellin-responsive element	gibberellin response
MsNAC3	GARE-motif	TCTGTTG	30	7	+	Brassica oleracea	gibberellin-responsive element	gibberellin response
MsNAC30	GARE-motif	TCTGTTG	754	7	-	Brassica oleracea	gibberellin-responsive element	gibberellin response
MsNAC31	P-box	CCTTTTG	1476	7	+	Oryza sativa	gibberellin-responsive element	gibberellin response
MsNAC34	P-box	CCTTTTG	1132	7	-	Oryza sativa	gibberellin-responsive element	gibberellin response
MsNAC35	GARE-motif	TCTGTTG	935	7	+	Brassica oleracea	gibberellin-responsive element	gibberellin response
MsNAC36	P-box	CCTTTTG	752	7	+	Oryza sativa	gibberellin-responsive element	gibberellin response
MsNAC36	GARE-motif	TCTGTTG	617	7	-	Brassica oleracea	gibberellin-responsive element	gibberellin response
MsNAC37	P-box	CCTTTTG	1334	7	+	Oryza sativa	gibberellin-responsive element	gibberellin response
MsNAC39	P-box	CCTTTTG	1903	7	-	Oryza sativa	gibberellin-responsive element	gibberellin response
MsNAC4	P-box	CCTTTTG	504	7	+	Oryza sativa	gibberellin-responsive element	gibberellin response
MsNAC40	P-box	CCTTTTG	925	7	-	Oryza sativa	gibberellin-responsive element	gibberellin response
MsNAC42	P-box	CCTTTTG	391	7	+	Oryza sativa	gibberellin-responsive element	gibberellin response
MsNAC43	P-box	CCTTTTG	814	7	-	Oryza sativa	gibberellin-responsive element	gibberellin response
MsNAC43	GARE-motif	TCTGTTG	1220	7	+	Brassica oleracea	gibberellin-responsive element	gibberellin response
MsNAC46	GARE-motif	TCTGTTG	557	7	+	Brassica oleracea	gibberellin-responsive element	gibberellin response
MsNAC46	P-box	CCTTTTG	508	7	+	Oryza sativa	gibberellin-responsive element	gibberellin response
MsNAC47	P-box	CCTTTTG	626	7	-	Oryza sativa	gibberellin-responsive element	gibberellin response
MsNAC5	GARE-motif	TCTGTTG	1161	7	-	Brassica oleracea	gibberellin-responsive element	gibberellin response
MsNAC50	GARE-motif	TCTGTTG	1489	7	-	Brassica oleracea	gibberellin-responsive element	gibberellin response
MsNAC50	P-box	CCTTTTG	962	7	+	Oryza sativa	gibberellin-responsive element	gibberellin response
MsNAC50	P-box	CCTTTTG	1934	7	-	Oryza sativa	gibberellin-responsive element	gibberellin response
MsNAC53	P-box	CCTTTTG	1410	7	+	Oryza sativa	gibberellin-responsive element	gibberellin response
MsNAC55	P-box	CCTTTTG	1166	7	-	Oryza sativa	gibberellin-responsive element	gibberellin response
MsNAC55	P-box	CCTTTTG	1425	7	-	Oryza sativa	gibberellin-responsive element	gibberellin response
MsNAC55	P-box	CCTTTTG	1610	7	+	Oryza sativa	gibberellin-responsive element	gibberellin response
MsNAC57	P-box	CCTTTTG	1638	7	+	Oryza sativa	gibberellin-responsive element	gibberellin response
MsNAC6	P-box	CCTTTTG	1840	7	+	Oryza sativa	gibberellin-responsive element	gibberellin response
MsNAC6	GARE-motif	TCTGTTG	617	7	-	Brassica oleracea	gibberellin-responsive element	gibberellin response
MsNAC60	GARE-motif	TCTGTTG	156	7	+	Brassica oleracea	gibberellin-responsive element	gibberellin response
MsNAC60	GARE-motif	TCTGTTG	311	7	-	Brassica oleracea	gibberellin-responsive element	gibberellin response
MsNAC61	P-box	CCTTTTG	1976	7	+	Oryza sativa	gibberellin-responsive element	gibberellin response
MsNAC65	P-box	CCTTTTG	1903	7	-	Oryza sativa	gibberellin-responsive element	gibberellin response
MsNAC67	P-box	CCTTTTG	1875	7	+	Oryza sativa	gibberellin-responsive element	gibberellin response
MsNAC68	GARE-motif	TCTGTTG	1839	7	+	Brassica oleracea	gibberellin-responsive element	gibberellin response
MsNAC73	GARE-motif	TCTGTTG	694	7	-	Brassica oleracea	gibberellin-responsive element	gibberellin response
MsNAC78	P-box	CCTTTTG	264	7	+	Oryza sativa	gibberellin-responsive element	gibberellin response
MsNAC78	P-box	CCTTTTG	1715	7	-	Oryza sativa	gibberellin-responsive element	gibberellin response
MsNAC79	GARE-motif	TCTGTTG	576	7	-	Brassica oleracea	gibberellin-responsive element	gibberellin response
MsNAC80	P-box	CCTTTTG	432	7	+	Oryza sativa	gibberellin-responsive element	gibberellin response
MsNAC80	P-box	CCTTTTG	681	7	-	Oryza sativa	gibberellin-responsive element	gibberellin response
MsNAC81	GARE-motif	TCTGTTG	127	7	-	Brassica oleracea	gibberellin-responsive element	gibberellin response
MsNAC81	GARE-motif	TCTGTTG	444	7	-	Brassica oleracea	gibberellin-responsive element	gibberellin response
MsNAC81	GARE-motif	TCTGTTG	672	7	-	Brassica oleracea	gibberellin-responsive element	gibberellin response
MsNAC81	GARE-motif	TCTGTTG	747	7	-	Brassica oleracea	gibberellin-responsive element	gibberellin response
MsNAC85	P-box	CCTTTTG	1250	7	-	Oryza sativa	gibberellin-responsive element	gibberellin response
MsNAC86	P-box	CCTTTTG	194	7	-	Oryza sativa	gibberellin-responsive element	gibberellin response
MsNAC87	P-box	CCTTTTG	741	7	-	Oryza sativa	gibberellin-responsive element	gibberellin response
MsNAC88	GARE-motif	TCTGTTG	483	7	+	Brassica oleracea	gibberellin-responsive element	gibberellin response
MsNAC88	P-box	CCTTTTG	1581	7	+	Oryza sativa	gibberellin-responsive element	gibberellin response
MsNAC90	P-box	CCTTTTG	1761	7	+	Oryza sativa	gibberellin-responsive element	gibberellin response
MsNAC90	GARE-motif	TCTGTTG	53	7	-	Brassica oleracea	gibberellin-responsive element	gibberellin response
MsNAC95	P-box	CCTTTTG	1807	7	-	Oryza sativa	gibberellin-responsive element	gibberellin response
MsNAC13	TATC-box	TATCCCA	797	7	+	Oryza sativa	cis-acting element involved in gibberellin-responsiveness	gibberellin response
MsNAC15	TATC-box	TATCCCA	1620	7	-	Oryza sativa	cis-acting element involved in gibberellin-responsiveness	gibberellin response
MsNAC20	TATC-box	TATCCCA	472	7	-	Oryza sativa	cis-acting element involved in gibberellin-responsiveness	gibberellin response
MsNAC21	TATC-box	TATCCCA	563	7	+	Oryza sativa	cis-acting element involved in gibberellin-responsiveness	gibberellin response
MsNAC22	TATC-box	TATCCCA	2	7	+	Oryza sativa	cis-acting element involved in gibberellin-responsiveness	gibberellin response
MsNAC24	TATC-box	TATCCCA	149	7	-	Oryza sativa	cis-acting element involved in gibberellin-responsiveness	gibberellin response
MsNAC26	TATC-box	TATCCCA	420	7	-	Oryza sativa	cis-acting element involved in gibberellin-responsiveness	gibberellin response
MsNAC28	TATC-box	TATCCCA	372	7	+	Oryza sativa	cis-acting element involved in gibberellin-responsiveness	gibberellin response
MsNAC31	TATC-box	TATCCCA	398	7	+	Oryza sativa	cis-acting element involved in gibberellin-responsiveness	gibberellin response
MsNAC42	TATC-box	TATCCCA	1596	7	+	Oryza sativa	cis-acting element involved in gibberellin-responsiveness	gibberellin response
MsNAC43	TATC-box	TATCCCA	1649	7	+	Oryza sativa	cis-acting element involved in gibberellin-responsiveness	gibberellin response
MsNAC5	TATC-box	TATCCCA	1463	7	+	Oryza sativa	cis-acting element involved in gibberellin-responsiveness	gibberellin response
MsNAC58	TATC-box	TATCCCA	1548	7	+	Oryza sativa	cis-acting element involved in gibberellin-responsiveness	gibberellin response
MsNAC59	TATC-box	TATCCCA	647	7	+	Oryza sativa	cis-acting element involved in gibberellin-responsiveness	gibberellin response
MsNAC6	TATC-box	TATCCCA	475	7	+	Oryza sativa	cis-acting element involved in gibberellin-responsiveness	gibberellin response
MsNAC65	TATC-box	TATCCCA	1122	7	-	Oryza sativa	cis-acting element involved in gibberellin-responsiveness	gibberellin response
MsNAC69	TATC-box	TATCCCA	53	7	-	Oryza sativa	cis-acting element involved in gibberellin-responsiveness	gibberellin response
MsNAC69	TATC-box	TATCCCA	959	7	-	Oryza sativa	cis-acting element involved in gibberellin-responsiveness	gibberellin response
MsNAC74	TATC-box	TATCCCA	1559	7	+	Oryza sativa	cis-acting element involved in gibberellin-responsiveness	gibberellin response
MsNAC80	TATC-box	TATCCCA	1610	7	+	Oryza sativa	cis-acting element involved in gibberellin-responsiveness	gibberellin response
MsNAC86	TATC-box	TATCCCA	1747	7	-	Oryza sativa	cis-acting element involved in gibberellin-responsiveness	gibberellin response
MsNAC87	TATC-box	TATCCCA	1738	7	-	Oryza sativa	cis-acting element involved in gibberellin-responsiveness	gibberellin response
MsNAC93	TATC-box	TATCCCA	139	7	+	Oryza sativa	cis-acting element involved in gibberellin-responsiveness	gibberellin response
MsNAC94	TATC-box	TATCCCA	323	7	-	Oryza sativa	cis-acting element involved in gibberellin-responsiveness	gibberellin response
MsNAC96	TATC-box	TATCCCA	1525	7	-	Oryza sativa	cis-acting element involved in gibberellin-responsiveness	gibberellin response
MsNAC15	MBS	CAACTG	919	6	+	Arabidopsis thaliana	MYB binding site involved in drought-inducibility	drought-inducibility
MsNAC16	MBS	CAACTG	805	6	+	Arabidopsis thaliana	MYB binding site involved in drought-inducibility	drought-inducibility
MsNAC17	MBS	CAACTG	236	6	+	Arabidopsis thaliana	MYB binding site involved in drought-inducibility	drought-inducibility
MsNAC18	MBS	CAACTG	142	6	-	Arabidopsis thaliana	MYB binding site involved in drought-inducibility	drought-inducibility
MsNAC18	MBS	CAACTG	1572	6	-	Arabidopsis thaliana	MYB binding site involved in drought-inducibility	drought-inducibility
MsNAC19	MBS	CAACTG	1369	6	-	Arabidopsis thaliana	MYB binding site involved in drought-inducibility	drought-inducibility
MsNAC19	MBS	CAACTG	1392	6	-	Arabidopsis thaliana	MYB binding site involved in drought-inducibility	drought-inducibility
MsNAC2	MBS	CAACTG	849	6	-	Arabidopsis thaliana	MYB binding site involved in drought-inducibility	drought-inducibility
MsNAC20	MBS	CAACTG	1939	6	+	Arabidopsis thaliana	MYB binding site involved in drought-inducibility	drought-inducibility
MsNAC22	MBS	CAACTG	71	6	+	Arabidopsis thaliana	MYB binding site involved in drought-inducibility	drought-inducibility
MsNAC26	MBS	CAACTG	31	6	+	Arabidopsis thaliana	MYB binding site involved in drought-inducibility	drought-inducibility
MsNAC26	MBS	CAACTG	1581	6	-	Arabidopsis thaliana	MYB binding site involved in drought-inducibility	drought-inducibility
MsNAC27	MBS	CAACTG	355	6	+	Arabidopsis thaliana	MYB binding site involved in drought-inducibility	drought-inducibility
MsNAC29	MBS	CAACTG	1865	6	-	Arabidopsis thaliana	MYB binding site involved in drought-inducibility	drought-inducibility
MsNAC29	MBS	CAACTG	1897	6	+	Arabidopsis thaliana	MYB binding site involved in drought-inducibility	drought-inducibility
MsNAC3	MBS	CAACTG	813	6	-	Arabidopsis thaliana	MYB binding site involved in drought-inducibility	drought-inducibility
MsNAC3	MBS	CAACTG	1734	6	+	Arabidopsis thaliana	MYB binding site involved in drought-inducibility	drought-inducibility
MsNAC30	MBS	CAACTG	220	6	+	Arabidopsis thaliana	MYB binding site involved in drought-inducibility	drought-inducibility
MsNAC32	MBS	CAACTG	851	6	-	Arabidopsis thaliana	MYB binding site involved in drought-inducibility	drought-inducibility
MsNAC32	MBS	CAACTG	941	6	+	Arabidopsis thaliana	MYB binding site involved in drought-inducibility	drought-inducibility
MsNAC33	MBS	CAACTG	1006	6	+	Arabidopsis thaliana	MYB binding site involved in drought-inducibility	drought-inducibility
MsNAC33	MBS	CAACTG	1684	6	+	Arabidopsis thaliana	MYB binding site involved in drought-inducibility	drought-inducibility
MsNAC34	MBS	CAACTG	1938	6	+	Arabidopsis thaliana	MYB binding site involved in drought-inducibility	drought-inducibility
MsNAC36	MBS	CAACTG	132	6	+	Arabidopsis thaliana	MYB binding site involved in drought-inducibility	drought-inducibility
MsNAC36	MBS	CAACTG	1828	6	-	Arabidopsis thaliana	MYB binding site involved in drought-inducibility	drought-inducibility
MsNAC4	MBS	CAACTG	799	6	+	Arabidopsis thaliana	MYB binding site involved in drought-inducibility	drought-inducibility
MsNAC4	MBS	CAACTG	1437	6	+	Arabidopsis thaliana	MYB binding site involved in drought-inducibility	drought-inducibility
MsNAC40	MBS	CAACTG	135	6	-	Arabidopsis thaliana	MYB binding site involved in drought-inducibility	drought-inducibility
MsNAC40	MBS	CAACTG	948	6	-	Arabidopsis thaliana	MYB binding site involved in drought-inducibility	drought-inducibility
MsNAC41	MBS	CAACTG	558	6	-	Arabidopsis thaliana	MYB binding site involved in drought-inducibility	drought-inducibility
MsNAC43	MBS	CAACTG	893	6	+	Arabidopsis thaliana	MYB binding site involved in drought-inducibility	drought-inducibility
MsNAC44	MBS	CAACTG	516	6	-	Arabidopsis thaliana	MYB binding site involved in drought-inducibility	drought-inducibility
MsNAC45	MBS	CAACTG	1368	6	-	Arabidopsis thaliana	MYB binding site involved in drought-inducibility	drought-inducibility
MsNAC45	MBS	CAACTG	1885	6	+	Arabidopsis thaliana	MYB binding site involved in drought-inducibility	drought-inducibility
MsNAC46	MBS	CAACTG	1321	6	-	Arabidopsis thaliana	MYB binding site involved in drought-inducibility	drought-inducibility
MsNAC47	MBS	CAACTG	167	6	+	Arabidopsis thaliana	MYB binding site involved in drought-inducibility	drought-inducibility
MsNAC47	MBS	CAACTG	1483	6	+	Arabidopsis thaliana	MYB binding site involved in drought-inducibility	drought-inducibility
MsNAC48	MBS	CAACTG	161	6	+	Arabidopsis thaliana	MYB binding site involved in drought-inducibility	drought-inducibility
MsNAC49	MBS	CAACTG	1264	6	-	Arabidopsis thaliana	MYB binding site involved in drought-inducibility	drought-inducibility
MsNAC49	MBS	CAACTG	1464	6	+	Arabidopsis thaliana	MYB binding site involved in drought-inducibility	drought-inducibility
MsNAC5	MBS	CAACTG	981	6	-	Arabidopsis thaliana	MYB binding site involved in drought-inducibility	drought-inducibility
MsNAC50	MBS	CAACTG	552	6	+	Arabidopsis thaliana	MYB binding site involved in drought-inducibility	drought-inducibility
MsNAC51	MBS	CAACTG	1293	6	+	Arabidopsis thaliana	MYB binding site involved in drought-inducibility	drought-inducibility
MsNAC52	MBS	CAACTG	1207	6	-	Arabidopsis thaliana	MYB binding site involved in drought-inducibility	drought-inducibility
MsNAC54	MBS	CAACTG	1661	6	-	Arabidopsis thaliana	MYB binding site involved in drought-inducibility	drought-inducibility
MsNAC55	MBS	CAACTG	679	6	-	Arabidopsis thaliana	MYB binding site involved in drought-inducibility	drought-inducibility
MsNAC57	MBS	CAACTG	544	6	-	Arabidopsis thaliana	MYB binding site involved in drought-inducibility	drought-inducibility
MsNAC57	MBS	CAACTG	1761	6	+	Arabidopsis thaliana	MYB binding site involved in drought-inducibility	drought-inducibility
MsNAC58	MBS	CAACTG	1905	6	-	Arabidopsis thaliana	MYB binding site involved in drought-inducibility	drought-inducibility
MsNAC6	MBS	CAACTG	947	6	+	Arabidopsis thaliana	MYB binding site involved in drought-inducibility	drought-inducibility
MsNAC60	MBS	CAACTG	1356	6	+	Arabidopsis thaliana	MYB binding site involved in drought-inducibility	drought-inducibility
MsNAC61	MBS	CAACTG	372	6	-	Arabidopsis thaliana	MYB binding site involved in drought-inducibility	drought-inducibility
MsNAC61	MBS	CAACTG	681	6	-	Arabidopsis thaliana	MYB binding site involved in drought-inducibility	drought-inducibility
MsNAC62	MBS	CAACTG	66	6	-	Arabidopsis thaliana	MYB binding site involved in drought-inducibility	drought-inducibility
MsNAC62	MBS	CAACTG	365	6	+	Arabidopsis thaliana	MYB binding site involved in drought-inducibility	drought-inducibility
MsNAC62	MBS	CAACTG	911	6	+	Arabidopsis thaliana	MYB binding site involved in drought-inducibility	drought-inducibility
MsNAC64	MBS	CAACTG	19	6	+	Arabidopsis thaliana	MYB binding site involved in drought-inducibility	drought-inducibility
MsNAC64	MBS	CAACTG	328	6	-	Arabidopsis thaliana	MYB binding site involved in drought-inducibility	drought-inducibility
MsNAC65	MBS	CAACTG	1274	6	+	Arabidopsis thaliana	MYB binding site involved in drought-inducibility	drought-inducibility
MsNAC66	MBS	CAACTG	1386	6	-	Arabidopsis thaliana	MYB binding site involved in drought-inducibility	drought-inducibility
MsNAC67	MBS	CAACTG	245	6	-	Arabidopsis thaliana	MYB binding site involved in drought-inducibility	drought-inducibility
MsNAC68	MBS	CAACTG	247	6	-	Arabidopsis thaliana	MYB binding site involved in drought-inducibility	drought-inducibility
MsNAC69	MBS	CAACTG	1010	6	+	Arabidopsis thaliana	MYB binding site involved in drought-inducibility	drought-inducibility
MsNAC7	MBS	CAACTG	482	6	+	Arabidopsis thaliana	MYB binding site involved in drought-inducibility	drought-inducibility
MsNAC71	MBS	CAACTG	1294	6	+	Arabidopsis thaliana	MYB binding site involved in drought-inducibility	drought-inducibility
MsNAC72	MBS	CAACTG	317	6	+	Arabidopsis thaliana	MYB binding site involved in drought-inducibility	drought-inducibility
MsNAC73	MBS	CAACTG	381	6	+	Arabidopsis thaliana	MYB binding site involved in drought-inducibility	drought-inducibility
MsNAC78	MBS	CAACTG	70	6	+	Arabidopsis thaliana	MYB binding site involved in drought-inducibility	drought-inducibility
MsNAC8	MBS	CAACTG	403	6	-	Arabidopsis thaliana	MYB binding site involved in drought-inducibility	drought-inducibility
MsNAC8	MBS	CAACTG	710	6	-	Arabidopsis thaliana	MYB binding site involved in drought-inducibility	drought-inducibility
MsNAC80	MBS	CAACTG	1682	6	+	Arabidopsis thaliana	MYB binding site involved in drought-inducibility	drought-inducibility
MsNAC82	MBS	CAACTG	749	6	-	Arabidopsis thaliana	MYB binding site involved in drought-inducibility	drought-inducibility
MsNAC82	MBS	CAACTG	785	6	-	Arabidopsis thaliana	MYB binding site involved in drought-inducibility	drought-inducibility
MsNAC86	MBS	CAACTG	579	6	+	Arabidopsis thaliana	MYB binding site involved in drought-inducibility	drought-inducibility
MsNAC88	MBS	CAACTG	1293	6	-	Arabidopsis thaliana	MYB binding site involved in drought-inducibility	drought-inducibility
MsNAC89	MBS	CAACTG	943	6	-	Arabidopsis thaliana	MYB binding site involved in drought-inducibility	drought-inducibility
MsNAC92	MBS	CAACTG	679	6	+	Arabidopsis thaliana	MYB binding site involved in drought-inducibility	drought-inducibility
MsNAC92	MBS	CAACTG	1514	6	-	Arabidopsis thaliana	MYB binding site involved in drought-inducibility	drought-inducibility
MsNAC92	MBS	CAACTG	1585	6	-	Arabidopsis thaliana	MYB binding site involved in drought-inducibility	drought-inducibility
MsNAC93	MBS	CAACTG	1286	6	+	Arabidopsis thaliana	MYB binding site involved in drought-inducibility	drought-inducibility
MsNAC93	MBS	CAACTG	1598	6	-	Arabidopsis thaliana	MYB binding site involved in drought-inducibility	drought-inducibility
MsNAC93	MBS	CAACTG	1909	6	+	Arabidopsis thaliana	MYB binding site involved in drought-inducibility	drought-inducibility
MsNAC94	MBS	CAACTG	436	6	-	Arabidopsis thaliana	MYB binding site involved in drought-inducibility	drought-inducibility
MsNAC94	MBS	CAACTG	1173	6	-	Arabidopsis thaliana	MYB binding site involved in drought-inducibility	drought-inducibility
MsNAC95	MBS	CAACTG	1393	6	+	Arabidopsis thaliana	MYB binding site involved in drought-inducibility	drought-inducibility
MsNAC96	MBS	CAACTG	473	6	-	Arabidopsis thaliana	MYB binding site involved in drought-inducibility	drought-inducibility
MsNAC48	TGA-box	TGACGTAA	711	8	+	Glycine max	part of an auxin-responsive element	auxin response
MsNAC58	TGA-box	TGACGTAA	1344	8	+	Glycine max	part of an auxin-responsive element	auxin response
MsNAC14	AuxRR-core	GGTCCAT	221	7	-	Nicotiana tabacum	cis-acting regulatory element involved in auxin responsiveness	auxin response
MsNAC16	AuxRR-core	GGTCCAT	1060	7	-	Nicotiana tabacum	cis-acting regulatory element involved in auxin responsiveness	auxin response
MsNAC19	AuxRR-core	GGTCCAT	371	7	+	Nicotiana tabacum	cis-acting regulatory element involved in auxin responsiveness	auxin response
MsNAC2	AuxRR-core	GGTCCAT	398	7	+	Nicotiana tabacum	cis-acting regulatory element involved in auxin responsiveness	auxin response
MsNAC21	AuxRR-core	GGTCCAT	1088	7	-	Nicotiana tabacum	cis-acting regulatory element involved in auxin responsiveness	auxin response
MsNAC25	AuxRR-core	GGTCCAT	182	7	-	Nicotiana tabacum	cis-acting regulatory element involved in auxin responsiveness	auxin response
MsNAC25	AuxRR-core	GGTCCAT	954	7	+	Nicotiana tabacum	cis-acting regulatory element involved in auxin responsiveness	auxin response
MsNAC25	AuxRR-core	GGTCCAT	1107	7	+	Nicotiana tabacum	cis-acting regulatory element involved in auxin responsiveness	auxin response
MsNAC30	AuxRR-core	GGTCCAT	574	7	-	Nicotiana tabacum	cis-acting regulatory element involved in auxin responsiveness	auxin response
MsNAC30	AuxRR-core	GGTCCAT	630	7	+	Nicotiana tabacum	cis-acting regulatory element involved in auxin responsiveness	auxin response
MsNAC30	AuxRR-core	GGTCCAT	1438	7	+	Nicotiana tabacum	cis-acting regulatory element involved in auxin responsiveness	auxin response
MsNAC30	AuxRR-core	GGTCCAT	1656	7	+	Nicotiana tabacum	cis-acting regulatory element involved in auxin responsiveness	auxin response
MsNAC30	AuxRR-core	GGTCCAT	1704	7	+	Nicotiana tabacum	cis-acting regulatory element involved in auxin responsiveness	auxin response
MsNAC32	AuxRR-core	GGTCCAT	1380	7	+	Nicotiana tabacum	cis-acting regulatory element involved in auxin responsiveness	auxin response
MsNAC4	AuxRR-core	GGTCCAT	1371	7	-	Nicotiana tabacum	cis-acting regulatory element involved in auxin responsiveness	auxin response
MsNAC40	AuxRR-core	GGTCCAT	718	7	+	Nicotiana tabacum	cis-acting regulatory element involved in auxin responsiveness	auxin response
MsNAC41	AuxRR-core	GGTCCAT	1623	7	+	Nicotiana tabacum	cis-acting regulatory element involved in auxin responsiveness	auxin response
MsNAC42	AuxRR-core	GGTCCAT	468	7	+	Nicotiana tabacum	cis-acting regulatory element involved in auxin responsiveness	auxin response
MsNAC44	AuxRR-core	GGTCCAT	1909	7	-	Nicotiana tabacum	cis-acting regulatory element involved in auxin responsiveness	auxin response
MsNAC52	AuxRR-core	GGTCCAT	876	7	+	Nicotiana tabacum	cis-acting regulatory element involved in auxin responsiveness	auxin response
MsNAC53	AuxRR-core	GGTCCAT	944	7	-	Nicotiana tabacum	cis-acting regulatory element involved in auxin responsiveness	auxin response
MsNAC53	AuxRR-core	GGTCCAT	1198	7	+	Nicotiana tabacum	cis-acting regulatory element involved in auxin responsiveness	auxin response
MsNAC56	AuxRR-core	GGTCCAT	1224	7	+	Nicotiana tabacum	cis-acting regulatory element involved in auxin responsiveness	auxin response
MsNAC59	AuxRR-core	GGTCCAT	395	7	+	Nicotiana tabacum	cis-acting regulatory element involved in auxin responsiveness	auxin response
MsNAC62	AuxRR-core	GGTCCAT	123	7	-	Nicotiana tabacum	cis-acting regulatory element involved in auxin responsiveness	auxin response
MsNAC64	AuxRR-core	GGTCCAT	1345	7	-	Nicotiana tabacum	cis-acting regulatory element involved in auxin responsiveness	auxin response
MsNAC64	AuxRR-core	GGTCCAT	1476	7	+	Nicotiana tabacum	cis-acting regulatory element involved in auxin responsiveness	auxin response
MsNAC65	AuxRR-core	GGTCCAT	1644	7	-	Nicotiana tabacum	cis-acting regulatory element involved in auxin responsiveness	auxin response
MsNAC66	AuxRR-core	GGTCCAT	656	7	+	Nicotiana tabacum	cis-acting regulatory element involved in auxin responsiveness	auxin response
MsNAC66	AuxRR-core	GGTCCAT	1169	7	-	Nicotiana tabacum	cis-acting regulatory element involved in auxin responsiveness	auxin response
MsNAC66	AuxRR-core	GGTCCAT	1251	7	+	Nicotiana tabacum	cis-acting regulatory element involved in auxin responsiveness	auxin response
MsNAC68	AuxRR-core	GGTCCAT	1447	7	-	Nicotiana tabacum	cis-acting regulatory element involved in auxin responsiveness	auxin response
MsNAC71	AuxRR-core	GGTCCAT	1548	7	+	Nicotiana tabacum	cis-acting regulatory element involved in auxin responsiveness	auxin response
MsNAC72	AuxRR-core	GGTCCAT	183	7	-	Nicotiana tabacum	cis-acting regulatory element involved in auxin responsiveness	auxin response
MsNAC73	AuxRR-core	GGTCCAT	757	7	-	Nicotiana tabacum	cis-acting regulatory element involved in auxin responsiveness	auxin response
MsNAC73	AuxRR-core	GGTCCAT	1112	7	-	Nicotiana tabacum	cis-acting regulatory element involved in auxin responsiveness	auxin response
MsNAC73	AuxRR-core	GGTCCAT	1549	7	+	Nicotiana tabacum	cis-acting regulatory element involved in auxin responsiveness	auxin response
MsNAC78	AuxRR-core	GGTCCAT	1434	7	-	Nicotiana tabacum	cis-acting regulatory element involved in auxin responsiveness	auxin response
MsNAC80	AuxRR-core	GGTCCAT	1627	7	-	Nicotiana tabacum	cis-acting regulatory element involved in auxin responsiveness	auxin response
MsNAC89	AuxRR-core	GGTCCAT	1528	7	+	Nicotiana tabacum	cis-acting regulatory element involved in auxin responsiveness	auxin response
MsNAC9	AuxRR-core	GGTCCAT	552	7	-	Nicotiana tabacum	cis-acting regulatory element involved in auxin responsiveness	auxin response
MsNAC9	AuxRR-core	GGTCCAT	832	7	-	Nicotiana tabacum	cis-acting regulatory element involved in auxin responsiveness	auxin response
MsNAC90	AuxRR-core	GGTCCAT	840	7	+	Nicotiana tabacum	cis-acting regulatory element involved in auxin responsiveness	auxin response
MsNAC90	AuxRR-core	GGTCCAT	1365	7	-	Nicotiana tabacum	cis-acting regulatory element involved in auxin responsiveness	auxin response
MsNAC91	AuxRR-core	GGTCCAT	532	7	+	Nicotiana tabacum	cis-acting regulatory element involved in auxin responsiveness	auxin response
MsNAC95	AuxRR-core	GGTCCAT	1988	7	-	Nicotiana tabacum	cis-acting regulatory element involved in auxin responsiveness	auxin response
MsNAC1	TGA-element	AACGAC	522	6	+	Brassica oleracea	auxin-responsive element	auxin response
MsNAC13	TGA-element	AACGAC	42	6	+	Brassica oleracea	auxin-responsive element	auxin response
MsNAC16	TGA-element	AACGAC	1124	6	-	Brassica oleracea	auxin-responsive element	auxin response
MsNAC18	TGA-element	AACGAC	1276	6	-	Brassica oleracea	auxin-responsive element	auxin response
MsNAC22	TGA-element	AACGAC	26	6	-	Brassica oleracea	auxin-responsive element	auxin response
MsNAC24	TGA-element	AACGAC	1644	6	+	Brassica oleracea	auxin-responsive element	auxin response
MsNAC24	TGA-element	AACGAC	1921	6	-	Brassica oleracea	auxin-responsive element	auxin response
MsNAC3	TGA-element	AACGAC	1320	6	-	Brassica oleracea	auxin-responsive element	auxin response
MsNAC37	TGA-element	AACGAC	62	6	+	Brassica oleracea	auxin-responsive element	auxin response
MsNAC39	TGA-element	AACGAC	1265	6	+	Brassica oleracea	auxin-responsive element	auxin response
MsNAC4	TGA-element	AACGAC	149	6	-	Brassica oleracea	auxin-responsive element	auxin response
MsNAC4	TGA-element	AACGAC	1913	6	-	Brassica oleracea	auxin-responsive element	auxin response
MsNAC43	TGA-element	AACGAC	3	6	-	Brassica oleracea	auxin-responsive element	auxin response
MsNAC43	TGA-element	AACGAC	1137	6	-	Brassica oleracea	auxin-responsive element	auxin response
MsNAC47	TGA-element	AACGAC	818	6	-	Brassica oleracea	auxin-responsive element	auxin response
MsNAC47	TGA-element	AACGAC	1164	6	-	Brassica oleracea	auxin-responsive element	auxin response
MsNAC47	TGA-element	AACGAC	1178	6	-	Brassica oleracea	auxin-responsive element	auxin response
MsNAC49	TGA-element	AACGAC	1600	6	+	Brassica oleracea	auxin-responsive element	auxin response
MsNAC5	TGA-element	AACGAC	218	6	+	Brassica oleracea	auxin-responsive element	auxin response
MsNAC5	TGA-element	AACGAC	1382	6	+	Brassica oleracea	auxin-responsive element	auxin response
MsNAC50	TGA-element	AACGAC	1460	6	-	Brassica oleracea	auxin-responsive element	auxin response
MsNAC54	TGA-element	AACGAC	398	6	-	Brassica oleracea	auxin-responsive element	auxin response
MsNAC54	TGA-element	AACGAC	856	6	-	Brassica oleracea	auxin-responsive element	auxin response
MsNAC56	TGA-element	AACGAC	1018	6	+	Brassica oleracea	auxin-responsive element	auxin response
MsNAC58	TGA-element	AACGAC	636	6	-	Brassica oleracea	auxin-responsive element	auxin response
MsNAC66	TGA-element	AACGAC	153	6	+	Brassica oleracea	auxin-responsive element	auxin response
MsNAC66	TGA-element	AACGAC	239	6	+	Brassica oleracea	auxin-responsive element	auxin response
MsNAC79	TGA-element	AACGAC	114	6	+	Brassica oleracea	auxin-responsive element	auxin response
MsNAC79	TGA-element	AACGAC	134	6	+	Brassica oleracea	auxin-responsive element	auxin response
MsNAC8	TGA-element	AACGAC	273	6	-	Brassica oleracea	auxin-responsive element	auxin response
MsNAC89	TGA-element	AACGAC	1058	6	-	Brassica oleracea	auxin-responsive element	auxin response
MsNAC89	TGA-element	AACGAC	1158	6	-	Brassica oleracea	auxin-responsive element	auxin response
MsNAC1	ABRE	ACGTG	690	5	+	Arabidopsis thaliana	cis-acting element involved in the abscisic acid responsiveness	abscisic acid response
MsNAC1	ABRE	GACACGTGGC	1506	9	+	Triticum aestivum	cis-acting element involved in the abscisic acid responsiveness	abscisic acid response
MsNAC1	ABRE	CACGTG	1508	6	-	Arabidopsis thaliana	cis-acting element involved in the abscisic acid responsiveness	abscisic acid response
MsNAC1	ABRE	ACGTG	1509	5	+	Arabidopsis thaliana	cis-acting element involved in the abscisic acid responsiveness	abscisic acid response
MsNAC1	ABRE	GCAACGTGTC	1538	9	+	Hordeum vulgare	cis-acting element involved in the abscisic acid responsiveness	abscisic acid response
MsNAC1	ABRE	ACGTG	1541	5	+	Arabidopsis thaliana	cis-acting element involved in the abscisic acid responsiveness	abscisic acid response
MsNAC1	ABRE	CACGTG	1713	6	-	Arabidopsis thaliana	cis-acting element involved in the abscisic acid responsiveness	abscisic acid response
MsNAC1	ABRE	ACGTG	1714	5	+	Arabidopsis thaliana	cis-acting element involved in the abscisic acid responsiveness	abscisic acid response
MsNAC1	ABRE	ACGTG	1967	5	-	Arabidopsis thaliana	cis-acting element involved in the abscisic acid responsiveness	abscisic acid response
MsNAC12	ABRE	CACGTG	124	6	+	Arabidopsis thaliana	cis-acting element involved in the abscisic acid responsiveness	abscisic acid response
MsNAC12	ABRE	ACGTG	125	5	+	Arabidopsis thaliana	cis-acting element involved in the abscisic acid responsiveness	abscisic acid response
MsNAC12	ABRE	GACACGTGGC	144	9	-	Triticum aestivum	cis-acting element involved in the abscisic acid responsiveness	abscisic acid response
MsNAC12	ABRE	CACGTG	146	6	+	Arabidopsis thaliana	cis-acting element involved in the abscisic acid responsiveness	abscisic acid response
MsNAC12	ABRE	ACGTG	147	5	+	Arabidopsis thaliana	cis-acting element involved in the abscisic acid responsiveness	abscisic acid response
MsNAC13	ABRE	ACGTG	146	5	-	Arabidopsis thaliana	cis-acting element involved in the abscisic acid responsiveness	abscisic acid response
MsNAC13	ABRE	ACGTG	993	5	-	Arabidopsis thaliana	cis-acting element involved in the abscisic acid responsiveness	abscisic acid response
MsNAC13	ABRE	CACGTG	1010	6	-	Arabidopsis thaliana	cis-acting element involved in the abscisic acid responsiveness	abscisic acid response
MsNAC13	ABRE	ACGTG	1011	5	+	Arabidopsis thaliana	cis-acting element involved in the abscisic acid responsiveness	abscisic acid response
MsNAC13	ABRE	TACGGTC	1138	7	-	Arabidopsis thaliana	cis-acting element involved in the abscisic acid responsiveness	abscisic acid response
MsNAC13	ABRE	CACGTG	1289	6	-	Arabidopsis thaliana	cis-acting element involved in the abscisic acid responsiveness	abscisic acid response
MsNAC13	ABRE	ACGTG	1290	5	+	Arabidopsis thaliana	cis-acting element involved in the abscisic acid responsiveness	abscisic acid response
MsNAC13	ABRE	GACACGTGGC	1488	9	-	Triticum aestivum	cis-acting element involved in the abscisic acid responsiveness	abscisic acid response
MsNAC13	ABRE	ACGTG	1490	5	-	Arabidopsis thaliana	cis-acting element involved in the abscisic acid responsiveness	abscisic acid response
MsNAC14	ABRE	CACGTG	1059	6	-	Arabidopsis thaliana	cis-acting element involved in the abscisic acid responsiveness	abscisic acid response
MsNAC14	ABRE	ACGTG	1060	5	+	Arabidopsis thaliana	cis-acting element involved in the abscisic acid responsiveness	abscisic acid response
MsNAC14	ABRE	ACGTG	1113	5	+	Arabidopsis thaliana	cis-acting element involved in the abscisic acid responsiveness	abscisic acid response
MsNAC14	ABRE	CACGTG	1521	6	-	Arabidopsis thaliana	cis-acting element involved in the abscisic acid responsiveness	abscisic acid response
MsNAC14	ABRE	ACGTG	1522	5	+	Arabidopsis thaliana	cis-acting element involved in the abscisic acid responsiveness	abscisic acid response
MsNAC14	ABRE	ACGTG	1546	5	-	Arabidopsis thaliana	cis-acting element involved in the abscisic acid responsiveness	abscisic acid response
MsNAC14	ABRE	CACGTG	1555	6	-	Arabidopsis thaliana	cis-acting element involved in the abscisic acid responsiveness	abscisic acid response
MsNAC14	ABRE	ACGTG	1556	5	+	Arabidopsis thaliana	cis-acting element involved in the abscisic acid responsiveness	abscisic acid response
MsNAC15	ABRE	CACGTG	446	6	+	Arabidopsis thaliana	cis-acting element involved in the abscisic acid responsiveness	abscisic acid response
MsNAC15	ABRE	ACGTG	447	5	+	Arabidopsis thaliana	cis-acting element involved in the abscisic acid responsiveness	abscisic acid response
MsNAC15	ABRE	ACGTG	699	5	-	Arabidopsis thaliana	cis-acting element involved in the abscisic acid responsiveness	abscisic acid response
MsNAC16	ABRE	CACGTG	399	6	+	Arabidopsis thaliana	cis-acting element involved in the abscisic acid responsiveness	abscisic acid response
MsNAC16	ABRE	ACGTG	400	5	+	Arabidopsis thaliana	cis-acting element involved in the abscisic acid responsiveness	abscisic acid response
MsNAC16	ABRE	ACGTG	494	5	-	Arabidopsis thaliana	cis-acting element involved in the abscisic acid responsiveness	abscisic acid response
MsNAC16	ABRE	ACGTG	903	5	+	Arabidopsis thaliana	cis-acting element involved in the abscisic acid responsiveness	abscisic acid response
MsNAC16	ABRE	ACGTG	1093	5	-	Arabidopsis thaliana	cis-acting element involved in the abscisic acid responsiveness	abscisic acid response
MsNAC16	ABRE	ACGTG	1121	5	-	Arabidopsis thaliana	cis-acting element involved in the abscisic acid responsiveness	abscisic acid response
MsNAC17	ABRE	ACGTG	261	5	-	Arabidopsis thaliana	cis-acting element involved in the abscisic acid responsiveness	abscisic acid response
MsNAC17	ABRE	ACGTG	270	5	+	Arabidopsis thaliana	cis-acting element involved in the abscisic acid responsiveness	abscisic acid response
MsNAC17	ABRE	ACGTG	279	5	+	Arabidopsis thaliana	cis-acting element involved in the abscisic acid responsiveness	abscisic acid response
MsNAC17	ABRE	ACGTG	367	5	+	Arabidopsis thaliana	cis-acting element involved in the abscisic acid responsiveness	abscisic acid response
MsNAC17	ABRE	GACACGTGGC	1903	9	-	Triticum aestivum	cis-acting element involved in the abscisic acid responsiveness	abscisic acid response
MsNAC17	ABRE	CACGTG	1905	6	-	Arabidopsis thaliana	cis-acting element involved in the abscisic acid responsiveness	abscisic acid response
MsNAC17	ABRE	ACGTG	1906	5	+	Arabidopsis thaliana	cis-acting element involved in the abscisic acid responsiveness	abscisic acid response
MsNAC18	ABRE	ACGTG	1160	5	-	Arabidopsis thaliana	cis-acting element involved in the abscisic acid responsiveness	abscisic acid response
MsNAC19	ABRE	CACGTG	32	6	+	Arabidopsis thaliana	cis-acting element involved in the abscisic acid responsiveness	abscisic acid response
MsNAC19	ABRE	ACGTG	33	5	+	Arabidopsis thaliana	cis-acting element involved in the abscisic acid responsiveness	abscisic acid response
MsNAC19	ABRE	TACGTGTC	1669	8	-	Oryza sativa	cis-acting element involved in the abscisic acid responsiveness	abscisic acid response
MsNAC19	ABRE	ACGTG	1671	5	-	Arabidopsis thaliana	cis-acting element involved in the abscisic acid responsiveness	abscisic acid response
MsNAC19	ABRE	ACGTG	1826	5	+	Arabidopsis thaliana	cis-acting element involved in the abscisic acid responsiveness	abscisic acid response
MsNAC19	ABRE	CACGTG	1884	6	-	Arabidopsis thaliana	cis-acting element involved in the abscisic acid responsiveness	abscisic acid response
MsNAC19	ABRE	ACGTG	1885	5	+	Arabidopsis thaliana	cis-acting element involved in the abscisic acid responsiveness	abscisic acid response
MsNAC2	ABRE	ACGTG	11	5	-	Arabidopsis thaliana	cis-acting element involved in the abscisic acid responsiveness	abscisic acid response
MsNAC2	ABRE	ACGTG	133	5	-	Arabidopsis thaliana	cis-acting element involved in the abscisic acid responsiveness	abscisic acid response
MsNAC2	ABRE	ACGTG	142	5	+	Arabidopsis thaliana	cis-acting element involved in the abscisic acid responsiveness	abscisic acid response
MsNAC2	ABRE	CACGTG	150	6	+	Arabidopsis thaliana	cis-acting element involved in the abscisic acid responsiveness	abscisic acid response
MsNAC2	ABRE	ACGTG	151	5	+	Arabidopsis thaliana	cis-acting element involved in the abscisic acid responsiveness	abscisic acid response
MsNAC2	ABRE	ACGTG	1751	5	-	Arabidopsis thaliana	cis-acting element involved in the abscisic acid responsiveness	abscisic acid response
MsNAC2	ABRE	GCCGCGTGGC	1795	10	-	Oryza sativa	cis-acting element involved in the abscisic acid responsiveness	abscisic acid response
MsNAC20	ABRE	CACGTG	331	6	+	Arabidopsis thaliana	cis-acting element involved in the abscisic acid responsiveness	abscisic acid response
MsNAC20	ABRE	ACGTG	332	5	+	Arabidopsis thaliana	cis-acting element involved in the abscisic acid responsiveness	abscisic acid response
MsNAC20	ABRE	ACGTG	469	5	+	Arabidopsis thaliana	cis-acting element involved in the abscisic acid responsiveness	abscisic acid response
MsNAC22	ABRE	CACGTG	196	6	+	Arabidopsis thaliana	cis-acting element involved in the abscisic acid responsiveness	abscisic acid response
MsNAC22	ABRE	ACGTG	197	5	+	Arabidopsis thaliana	cis-acting element involved in the abscisic acid responsiveness	abscisic acid response
MsNAC22	ABRE	CACGTG	1686	6	-	Arabidopsis thaliana	cis-acting element involved in the abscisic acid responsiveness	abscisic acid response
MsNAC22	ABRE	ACGTG	1687	5	+	Arabidopsis thaliana	cis-acting element involved in the abscisic acid responsiveness	abscisic acid response
MsNAC22	ABRE	CACGTG	1879	6	-	Arabidopsis thaliana	cis-acting element involved in the abscisic acid responsiveness	abscisic acid response
MsNAC22	ABRE	ACGTG	1880	5	+	Arabidopsis thaliana	cis-acting element involved in the abscisic acid responsiveness	abscisic acid response
MsNAC23	ABRE	ACGTG	67	5	-	Arabidopsis thaliana	cis-acting element involved in the abscisic acid responsiveness	abscisic acid response
MsNAC23	ABRE	ACGTG	215	5	-	Arabidopsis thaliana	cis-acting element involved in the abscisic acid responsiveness	abscisic acid response
MsNAC23	ABRE	ACGTG	363	5	-	Arabidopsis thaliana	cis-acting element involved in the abscisic acid responsiveness	abscisic acid response
MsNAC23	ABRE	ACGTG	511	5	-	Arabidopsis thaliana	cis-acting element involved in the abscisic acid responsiveness	abscisic acid response
MsNAC23	ABRE	ACGTG	659	5	-	Arabidopsis thaliana	cis-acting element involved in the abscisic acid responsiveness	abscisic acid response
MsNAC23	ABRE	ACGTG	807	5	-	Arabidopsis thaliana	cis-acting element involved in the abscisic acid responsiveness	abscisic acid response
MsNAC23	ABRE	ACGTG	955	5	-	Arabidopsis thaliana	cis-acting element involved in the abscisic acid responsiveness	abscisic acid response
MsNAC23	ABRE	ACGTG	1103	5	-	Arabidopsis thaliana	cis-acting element involved in the abscisic acid responsiveness	abscisic acid response
MsNAC23	ABRE	ACGTG	1251	5	-	Arabidopsis thaliana	cis-acting element involved in the abscisic acid responsiveness	abscisic acid response
MsNAC23	ABRE	ACGTG	1695	5	-	Arabidopsis thaliana	cis-acting element involved in the abscisic acid responsiveness	abscisic acid response
MsNAC23	ABRE	ACGTG	1843	5	-	Arabidopsis thaliana	cis-acting element involved in the abscisic acid responsiveness	abscisic acid response
MsNAC23	ABRE	ACGTG	1991	5	-	Arabidopsis thaliana	cis-acting element involved in the abscisic acid responsiveness	abscisic acid response
MsNAC24	ABRE	ACGTG	1582	5	-	Arabidopsis thaliana	cis-acting element involved in the abscisic acid responsiveness	abscisic acid response
MsNAC24	ABRE	GACACGTGGC	1950	9	-	Triticum aestivum	cis-acting element involved in the abscisic acid responsiveness	abscisic acid response
MsNAC25	ABRE	ACGTG	554	5	-	Arabidopsis thaliana	cis-acting element involved in the abscisic acid responsiveness	abscisic acid response
MsNAC25	ABRE	GACACGTGGC	567	9	-	Triticum aestivum	cis-acting element involved in the abscisic acid responsiveness	abscisic acid response
MsNAC25	ABRE	GACACGTGGC	690	9	+	Triticum aestivum	cis-acting element involved in the abscisic acid responsiveness	abscisic acid response
MsNAC25	ABRE	CACGTG	692	6	+	Arabidopsis thaliana	cis-acting element involved in the abscisic acid responsiveness	abscisic acid response
MsNAC25	ABRE	ACGTG	693	5	+	Arabidopsis thaliana	cis-acting element involved in the abscisic acid responsiveness	abscisic acid response
MsNAC25	ABRE	ACGTG	945	5	-	Arabidopsis thaliana	cis-acting element involved in the abscisic acid responsiveness	abscisic acid response
MsNAC25	ABRE	ACGTG	1188	5	+	Arabidopsis thaliana	cis-acting element involved in the abscisic acid responsiveness	abscisic acid response
MsNAC25	ABRE	TACGGTC	1636	7	+	Arabidopsis thaliana	cis-acting element involved in the abscisic acid responsiveness	abscisic acid response
MsNAC26	ABRE	ACGTG	1352	5	+	Arabidopsis thaliana	cis-acting element involved in the abscisic acid responsiveness	abscisic acid response
MsNAC26	ABRE	ACGTG	1714	5	+	Arabidopsis thaliana	cis-acting element involved in the abscisic acid responsiveness	abscisic acid response
MsNAC27	ABRE	ACGTG	1355	5	+	Arabidopsis thaliana	cis-acting element involved in the abscisic acid responsiveness	abscisic acid response
MsNAC27	ABRE	ACGTG	1589	5	-	Arabidopsis thaliana	cis-acting element involved in the abscisic acid responsiveness	abscisic acid response
MsNAC28	ABRE	ACGTG	29	5	+	Arabidopsis thaliana	cis-acting element involved in the abscisic acid responsiveness	abscisic acid response
MsNAC28	ABRE	GACACGTGGC	198	9	+	Triticum aestivum	cis-acting element involved in the abscisic acid responsiveness	abscisic acid response
MsNAC28	ABRE	CACGTG	200	6	+	Arabidopsis thaliana	cis-acting element involved in the abscisic acid responsiveness	abscisic acid response
[truncated: 354 more rows]

## Sheet: Table 7
TableS7 Orthologous NAC gene pairs between M. sinostellata and related species.
A. thaliana Gene ID	A. thaliana Gene ID	M. sinostellata Gene ID	M. sinostellata or Related Species Gene ID	Ks Value	Synteny Direction
AT2G33480.1	AT2G33710.2	evm.model.ctg97.13	evm.model.ctg97.89.2 (MsNAC95)	37	-
AT4G28300.1	AT4G28500.1	evm.model.ctg72.55	evm.model.ctg72.80 (MsNAC82)	25	+
AT4G28300.1	AT4G28500.1	evm.model.ctg86.56	evm.model.ctg86.80 (MsNAC90)	22	+
AT5G63780.1	AT5G64130.3	evm.model.ctg55.374 (MsNAC68)	evm.model.ctg55.485	59	-
evm.model.ctg167.8 (MsNAC16)	evm.model.ctg167.42	rna-XM_058251695.1	rna-XM_058251759.1	34	-

## Sheet: Table8
Table S8 Duplicated MsNAC gene pairs and their calculated Ka/Ks ratios.
Sequence	Genefamily_name	Method	Ka	Ks	Ka/Ks	P-Value(Fisher)
evm.model.ctg52.34-evm.model.ctg167.14	MsNAC65-MsNAC14	YN	0.39549	99	0.00399485	0
evm.model.ctg72.409-evm.model.ctg88.68	MsNAC80-MsNAC92	YN	0.119922	2.89876	0.04137	8.17673e-42
evm.model.ctg5.74-evm.model.ctg33.522	MsNAC72-MsNAC49	YN	0.183088	1.9276	0.0949823	2.79447e-40
evm.model.ctg55.403-evm.model.ctg102.5	MsNAC69-MsNAC1	YN	0.155987	1.55583	0.10026	1.18507e-23
evm.model.ctg162.147-evm.model.ctg204.116	MsNAC11-evm.model.ctg204.116	YN	0.209144	1.89427	0.110409	1.28082e-16
evm.model.ctg72.59-evm.model.ctg86.60	MsNAC81-MsNAC87	YN	0.142347	1.13617	0.125286	6.10232e-38
evm.model.ctg72.80-evm.model.ctg86.80	MsNAC82-MsNAC90	YN	0.161895	1.26128	0.128357	8.73104e-28
evm.model.ctg144.270-evm.model.ctg167.14	MsNAC9-MsNAC14	YN	0.212788	1.53327	0.138781	2.92525e-37
evm.model.ctg52.35.1-evm.model.ctg167.17	MsNAC66-MsNAC15	YN	0.30248	2.15431	0.140406	3.87607e-39
evm.model.ctg58.251-evm.model.ctg111.127	MsNAC75-MsNAC5	YN	0.240731	1.63448	0.147283	4.67942e-22
evm.model.ctg26.237-evm.model.ctg38.123	MsNAC44-MsNAC55	YN	0.166918	1.12622	0.148212	3.95073e-34
evm.model.ctg50.580-evm.model.ctg189.14	MsNAC62-MsNAC28	YN	0.192108	1.21091	0.158647	1.87557e-33
evm.model.ctg45.480-evm.model.ctg197.85	MsNAC61-MsNAC31	YN	0.172834	1.0627	0.162637	9.3594e-30
evm.model.ctg55.493-evm.model.ctg103.41	MsNAC71-MsNAC2	YN	0.181087	1.10672	0.163625	4.62452e-31
evm.model.ctg144.249.1-evm.model.ctg167.8	MsNAC8-MsNAC16	YN	0.168456	0.967947	0.174034	8.55245e-24
evm.model.ctg67.447-evm.model.ctg252.153	MsNAC78-MsNAC39	YN	0.166294	0.949421	0.175153	5.19317e-25
evm.model.ctg144.273-evm.model.ctg167.17	MsNAC10-MsNAC15	YN	0.17355	0.929576	0.186698	1.33307e-24
evm.model.ctg83.103-evm.model.ctg97.89.2	MsNAC86-MsNAC95	YN	0.191067	0.87123	0.219307	1.73677e-16
evm.model.ctg3.239-evm.model.ctg33.83	MsNAC48-evm.model.ctg33.83	YN	0.133499	0.592518	0.225307	3.37434e-12
evm.model.ctg25.139-evm.model.ctg41.33	MsNAC36-evm.model.ctg41.33	YN	0.153772	0.679345	0.226353	1.54631e-17
evm.model.ctg75.71-evm.model.ctg90.49_evm.model.ctg90.50	MsNAC84-MsNAC93	YN	0.243089	1.0588	0.229589	3.25342e-17
evm.model.ctg58.24-evm.model.ctg106.321	MsNAC74-MsNAC4	YN	0.266228	1.01383	0.262595	2.08572e-27
evm.model.ctg52.98-evm.model.ctg99.81	MsNAC67-MsNAC96	YN	0.243173	0.925323	0.262797	6.13172e-19
evm.model.ctg72.81-evm.model.ctg86.83	MsNAC83-MsNAC91	YN	0.411452	1.43642	0.286442	7.36165e-13
evm.model.ctg5.161-evm.model.ctg33.754_evm.model.ctg33.755	MsNAC64-MsNAC50	YN	0.650343	1.83604	0.354209	3.25483e-19
evm.model.ctg55.374-evm.model.ctg101.528	MsNAC68-evm.model.ctg101.528	YN	0.398782	1.04922	0.380076	3.80925e-11
evm.model.ctg3.57-evm.model.ctg31.58	MsNAC53-MsNAC47	YN	0.255837	0.602113	0.424898	5.28173e-08
